# Supplementary material for: A multi-stimuli responsive conductive sonometallogel: a mechanistic insight into the role of ultrasound in gelation
Source: Royal Society of Chemistry journal article supplement (doi:10.1039/c7ta00854f), 2017-01-01
Supplement: c7ta00854f1.log [file c7ta00854f1.log]

 Entering Gaussian System, Link 0=/opt/software/g09/g09
 Input=./37262.MD2AAS
 Output=./MD2AAS.log
 Initial command:
 /opt/software/g09/l1.exe /scratch/pritamm/gauss_scratch/Gau-18799.inp -scrdir=/scratch/pritamm/gauss_scratch/
 Entering Link 1 = /opt/software/g09/l1.exe PID=     18800.
  
 Copyright (c) 1988,1990,1992,1993,1995,1998,2003,2009,2010,
            Gaussian, Inc.  All Rights Reserved.
  
 This is part of the Gaussian(R) 09 program.  It is based on
 the Gaussian(R) 03 system (copyright 2003, Gaussian, Inc.),
 the Gaussian(R) 98 system (copyright 1998, Gaussian, Inc.),
 the Gaussian(R) 94 system (copyright 1995, Gaussian, Inc.),
 the Gaussian 92(TM) system (copyright 1992, Gaussian, Inc.),
 the Gaussian 90(TM) system (copyright 1990, Gaussian, Inc.),
 the Gaussian 88(TM) system (copyright 1988, Gaussian, Inc.),
 the Gaussian 86(TM) system (copyright 1986, Carnegie Mellon
 University), and the Gaussian 82(TM) system (copyright 1983,
 Carnegie Mellon University). Gaussian is a federally registered
 trademark of Gaussian, Inc.
  
 This software contains proprietary and confidential information,
 including trade secrets, belonging to Gaussian, Inc.
  
 This software is provided under written license and may be
 used, copied, transmitted, or stored only in accord with that
 written license.
  
 The following legend is applicable only to US Government
 contracts under FAR:
  
                    RESTRICTED RIGHTS LEGEND
  
 Use, reproduction and disclosure by the US Government is
 subject to restrictions as set forth in subparagraphs (a)
 and (c) of the Commercial Computer Software - Restricted
 Rights clause in FAR 52.227-19.
  
 Gaussian, Inc.
 340 Quinnipiac St., Bldg. 40, Wallingford CT 06492
  
  
 ---------------------------------------------------------------
 Warning -- This program may not be used in any manner that
 competes with the business of Gaussian, Inc. or will provide
 assistance to any competitor of Gaussian, Inc.  The licensee
 of this program is prohibited from giving any competitor of
 Gaussian, Inc. access to this program.  By using this program,
 the user acknowledges that Gaussian, Inc. is engaged in the
 business of creating and licensing software in the field of
 computational chemistry and represents and warrants to the
 licensee that it is not a competitor of Gaussian, Inc. and that
 it will not use this program in any manner prohibited above.
 ---------------------------------------------------------------
  

 Cite this work as:
 Gaussian 09, Revision B.01,
 M. J. Frisch, G. W. Trucks, H. B. Schlegel, G. E. Scuseria, 
 M. A. Robb, J. R. Cheeseman, G. Scalmani, V. Barone, B. Mennucci, 
 G. A. Petersson, H. Nakatsuji, M. Caricato, X. Li, H. P. Hratchian, 
 A. F. Izmaylov, J. Bloino, G. Zheng, J. L. Sonnenberg, M. Hada, 
 M. Ehara, K. Toyota, R. Fukuda, J. Hasegawa, M. Ishida, T. Nakajima, 
 Y. Honda, O. Kitao, H. Nakai, T. Vreven, J. A. Montgomery, Jr., 
 J. E. Peralta, F. Ogliaro, M. Bearpark, J. J. Heyd, E. Brothers, 
 K. N. Kudin, V. N. Staroverov, T. Keith, R. Kobayashi, J. Normand, 
 K. Raghavachari, A. Rendell, J. C. Burant, S. S. Iyengar, J. Tomasi, 
 M. Cossi, N. Rega, J. M. Millam, M. Klene, J. E. Knox, J. B. Cross, 
 V. Bakken, C. Adamo, J. Jaramillo, R. Gomperts, R. E. Stratmann, 
 O. Yazyev, A. J. Austin, R. Cammi, C. Pomelli, J. W. Ochterski, 
 R. L. Martin, K. Morokuma, V. G. Zakrzewski, G. A. Voth, 
 P. Salvador, J. J. Dannenberg, S. Dapprich, A. D. Daniels, 
 O. Farkas, J. B. Foresman, J. V. Ortiz, J. Cioslowski, 
 and D. J. Fox, Gaussian, Inc., Wallingford CT, 2010.
 
 ******************************************
 Gaussian 09:  AM64L-G09RevB.01 12-Aug-2010
                13-Oct-2016 
 ******************************************
 %NProcShared=20
 Will use up to   20 processors via shared memory.
 %LindaWorkers=hpc567:1,hpc573:1,hpc579:1
 SetLPE:  input flags=""
 SetLPE:    new flags=" -nodelist 'hpc567 hpc573 hpc579'"
 Will use up to    3 processors via Linda.
 %chk=MD1ASS.chk
 %mem=10GB
 ----------------------------------------------------------------------
 #p opt freq ub3lyp/genecp scrf=(solvent=water) pseudo=read geom=connec
 tivity
 ----------------------------------------------------------------------
 1/14=-1,18=20,19=15,26=3,38=1,57=2/1,3;
 2/9=110,12=2,17=6,18=5,40=1/2;
 3/5=7,11=2,16=1,17=8,25=1,30=1,70=2201,71=1,72=1,74=-5,116=2/1,2,3;
 4//1;
 5/5=2,38=5,53=1/2;
 6/7=2,8=2,9=2,10=2,28=1/1;
 7//1,2,3,16;
 1/14=-1,18=20,19=15/3(2);
 2/9=110/2;
 99//99;
 2/9=110/2;
 3/5=7,6=1,11=2,16=1,17=8,25=1,30=1,70=2205,71=1,72=1,74=-5,82=7,116=2/1,2,3;
 4/5=5,16=3/1;
 5/5=2,38=5,53=1/2;
 7//1,2,3,16;
 1/14=-1,18=20,19=15/3(-5);
 2/9=110/2;
 6/7=2,8=2,9=2,10=2,19=2,28=1/1;
 99/9=1/99;
 Leave Link    1 at Thu Oct 13 22:36:02 2016, MaxMem= 1342177280 cpu:      17.3
 (Enter /opt/software/g09/l101.exe)
 ----------------------------
 geometry optimisation MD2AAS
 ----------------------------
 Symbolic Z-matrix:
 Charge =  0 Multiplicity = 1
 O                     0.        0.        0. 
 C                     0.        0.        1.42847 
 C                     1.46164   0.        1.95231 
 C                    -0.66336   1.28555   1.99587 
 C                    -0.65773  -1.3034    1.95976 
 O                     1.69117  -0.09807   3.15559 
 C                    -2.00728   1.57999   1.35883 
 C                    -2.12055  -1.47537   1.56968 
 O                    -3.05037  -1.31849   2.34276 
 O                    -2.18634   1.4716    0.13634 
 N                    -3.026     2.00825   2.15262 
 N                     2.38847   0.13011   0.96219 
 N                     3.76296   0.16923   1.00145 
 C                     4.42491   0.30224  -0.09862 
 C                     5.88769   0.35673  -0.14172 
 C                     6.47361   0.50668  -1.41312 
 C                     7.85016   0.57462  -1.59944 
 C                     8.68917   0.49165  -0.4872 
 C                     8.14352   0.34282   0.78587 
 C                     6.75773   0.27421   0.97446 
 N                    -2.90446   2.10418   3.50545 
 C                    -3.96936   2.40151   4.15969 
 C                    -4.03604   2.54415   5.61009 
 C                    -2.94306   2.35161   6.49219 
 C                    -3.12757   2.50433   7.87118 
 C                    -4.37305   2.84525   8.39331 
 C                    -5.46103   3.03997   7.54006 
 C                    -5.2807    2.88768   6.17016 
 O                    -1.73373   2.0213    5.97306 
 N                    -2.28835  -1.84167   0.244 
 N                    -3.54376  -1.92541  -0.27037 
 C                    -4.55241  -1.64306   0.48155 
 C                    -5.90963  -1.72132  -0.02987 
 C                    -6.99002  -1.39138   0.81041 
 C                    -8.30223  -1.45874   0.36389 
 C                    -8.55361  -1.86599  -0.95384 
 C                    -7.50857  -2.19998  -1.80694 
 C                    -6.17828  -2.13453  -1.36514 
 O                    -5.20821  -2.47165  -2.23169 
 H                    -0.75029   0.58227  -0.27002 
 H                    -0.01731   2.13788   1.74876 
 H                    -0.73329   1.22991   3.0808 
 H                    -0.5977   -1.3198    3.04796 
 H                    -0.07166  -2.14322   1.56919 
 H                    -3.92716   2.13364   1.68948 
 H                     2.01172   0.19319   0.0254 
 H                     3.92367   0.38333  -1.06077 
 H                     8.26312   0.69095  -2.59619 
 H                     9.7677    0.54233  -0.60479 
 H                     8.79689   0.27808   1.65425 
 H                    -4.92085   2.56281   3.6339 
 H                    -2.28006   2.35206   8.53656 
 H                    -4.48978   2.95707   9.46714 
 H                    -6.43513   3.30421   7.93796 
 H                    -6.12304   3.03274   5.49849 
 H                    -1.10474   1.89223   6.69592 
 H                    -1.87801  -0.92644   0.42391 
 H                    -4.41953  -1.34046   1.52806 
 H                    -6.77693  -1.07844   1.83012 
 H                    -9.12158  -1.19967   1.02653 
 H                    -9.57605  -1.92287  -1.31696 
 H                    -7.68953  -2.5169   -2.82877 
 H                    -4.33195  -2.37251  -1.78376 
 O                     6.22094   0.12111   2.29101 
 H                     6.93941   0.04751   2.92346 
 H                     5.83503   0.57086  -2.26928 
 
 NAtoms=     66 NQM=     66 NQMF=      0 NMic=      0 NMicF=      0 NTot=     66.
                    Isotopes and Nuclear Properties:
 (Nuclear quadrupole moments (NQMom) in fm**2, nuclear magnetic moments (NMagM)
  in nuclear magnetons)

  Atom         1           2           3           4           5           6           7           8           9          10
 IAtWgt=          16          12          12          12          12          16          12          12          16          16
 AtmWgt=  15.9949146  12.0000000  12.0000000  12.0000000  12.0000000  15.9949146  12.0000000  12.0000000  15.9949146  15.9949146
 NucSpn=           0           0           0           0           0           0           0           0           0           0
 AtZEff=   0.0000000   0.0000000   0.0000000   0.0000000   0.0000000   0.0000000   0.0000000   0.0000000   0.0000000   0.0000000
 NQMom=    0.0000000   0.0000000   0.0000000   0.0000000   0.0000000   0.0000000   0.0000000   0.0000000   0.0000000   0.0000000
 NMagM=    0.0000000   0.0000000   0.0000000   0.0000000   0.0000000   0.0000000   0.0000000   0.0000000   0.0000000   0.0000000

  Atom        11          12          13          14          15          16          17          18          19          20
 IAtWgt=          14          14          14          12          12          12          12          12          12          12
 AtmWgt=  14.0030740  14.0030740  14.0030740  12.0000000  12.0000000  12.0000000  12.0000000  12.0000000  12.0000000  12.0000000
 NucSpn=           2           2           2           0           0           0           0           0           0           0
 AtZEff=   0.0000000   0.0000000   0.0000000   0.0000000   0.0000000   0.0000000   0.0000000   0.0000000   0.0000000   0.0000000
 NQMom=    2.0440000   2.0440000   2.0440000   0.0000000   0.0000000   0.0000000   0.0000000   0.0000000   0.0000000   0.0000000
 NMagM=    0.4037610   0.4037610   0.4037610   0.0000000   0.0000000   0.0000000   0.0000000   0.0000000   0.0000000   0.0000000

  Atom        21          22          23          24          25          26          27          28          29          30
 IAtWgt=          14          12          12          12          12          12          12          12          16          14
 AtmWgt=  14.0030740  12.0000000  12.0000000  12.0000000  12.0000000  12.0000000  12.0000000  12.0000000  15.9949146  14.0030740
 NucSpn=           2           0           0           0           0           0           0           0           0           2
 AtZEff=   0.0000000   0.0000000   0.0000000   0.0000000   0.0000000   0.0000000   0.0000000   0.0000000   0.0000000   0.0000000
 NQMom=    2.0440000   0.0000000   0.0000000   0.0000000   0.0000000   0.0000000   0.0000000   0.0000000   0.0000000   2.0440000
 NMagM=    0.4037610   0.0000000   0.0000000   0.0000000   0.0000000   0.0000000   0.0000000   0.0000000   0.0000000   0.4037610

  Atom        31          32          33          34          35          36          37          38          39          40
 IAtWgt=          14          12          12          12          12          12          12          12          16           1
 AtmWgt=  14.0030740  12.0000000  12.0000000  12.0000000  12.0000000  12.0000000  12.0000000  12.0000000  15.9949146   1.0078250
 NucSpn=           2           0           0           0           0           0           0           0           0           1
 AtZEff=   0.0000000   0.0000000   0.0000000   0.0000000   0.0000000   0.0000000   0.0000000   0.0000000   0.0000000   0.0000000
 NQMom=    2.0440000   0.0000000   0.0000000   0.0000000   0.0000000   0.0000000   0.0000000   0.0000000   0.0000000   0.0000000
 NMagM=    0.4037610   0.0000000   0.0000000   0.0000000   0.0000000   0.0000000   0.0000000   0.0000000   0.0000000   2.7928460

  Atom        41          42          43          44          45          46          47          48          49          50
 IAtWgt=           1           1           1           1           1           1           1           1           1           1
 AtmWgt=   1.0078250   1.0078250   1.0078250   1.0078250   1.0078250   1.0078250   1.0078250   1.0078250   1.0078250   1.0078250
 NucSpn=           1           1           1           1           1           1           1           1           1           1
 AtZEff=   0.0000000   0.0000000   0.0000000   0.0000000   0.0000000   0.0000000   0.0000000   0.0000000   0.0000000   0.0000000
 NQMom=    0.0000000   0.0000000   0.0000000   0.0000000   0.0000000   0.0000000   0.0000000   0.0000000   0.0000000   0.0000000
 NMagM=    2.7928460   2.7928460   2.7928460   2.7928460   2.7928460   2.7928460   2.7928460   2.7928460   2.7928460   2.7928460

  Atom        51          52          53          54          55          56          57          58          59          60
 IAtWgt=           1           1           1           1           1           1           1           1           1           1
 AtmWgt=   1.0078250   1.0078250   1.0078250   1.0078250   1.0078250   1.0078250   1.0078250   1.0078250   1.0078250   1.0078250
 NucSpn=           1           1           1           1           1           1           1           1           1           1
 AtZEff=   0.0000000   0.0000000   0.0000000   0.0000000   0.0000000   0.0000000   0.0000000   0.0000000   0.0000000   0.0000000
 NQMom=    0.0000000   0.0000000   0.0000000   0.0000000   0.0000000   0.0000000   0.0000000   0.0000000   0.0000000   0.0000000
 NMagM=    2.7928460   2.7928460   2.7928460   2.7928460   2.7928460   2.7928460   2.7928460   2.7928460   2.7928460   2.7928460

  Atom        61          62          63          64          65          66
 IAtWgt=           1           1           1          16           1           1
 AtmWgt=   1.0078250   1.0078250   1.0078250  15.9949146   1.0078250   1.0078250
 NucSpn=           1           1           1           0           1           1
 AtZEff=   0.0000000   0.0000000   0.0000000   0.0000000   0.0000000   0.0000000
 NQMom=    0.0000000   0.0000000   0.0000000   0.0000000   0.0000000   0.0000000
 NMagM=    2.7928460   2.7928460   2.7928460   0.0000000   2.7928460   2.7928460
 Leave Link  101 at Thu Oct 13 22:36:02 2016, MaxMem= 1342177280 cpu:       1.5
 (Enter /opt/software/g09/l103.exe)

 GradGradGradGradGradGradGradGradGradGradGradGradGradGradGradGradGradGrad
 Berny optimization.
 Initialization pass.
                           ----------------------------
                           !    Initial Parameters    !
                           ! (Angstroms and Degrees)  !
 --------------------------                            --------------------------
 ! Name  Definition              Value          Derivative Info.                !
 --------------------------------------------------------------------------------
 ! R1    R(1,2)                  1.4285         estimate D2E/DX2                !
 ! R2    R(1,40)                 0.9874         estimate D2E/DX2                !
 ! R3    R(2,3)                  1.5527         estimate D2E/DX2                !
 ! R4    R(2,4)                  1.5539         estimate D2E/DX2                !
 ! R5    R(2,5)                  1.5536         estimate D2E/DX2                !
 ! R6    R(3,6)                  1.2289         estimate D2E/DX2                !
 ! R7    R(3,12)                 1.3625         estimate D2E/DX2                !
 ! R8    R(4,7)                  1.5161         estimate D2E/DX2                !
 ! R9    R(4,41)                 1.0977         estimate D2E/DX2                !
 ! R10   R(4,42)                 1.0886         estimate D2E/DX2                !
 ! R11   R(5,8)                  1.5237         estimate D2E/DX2                !
 ! R12   R(5,43)                 1.09           estimate D2E/DX2                !
 ! R13   R(5,44)                 1.0961         estimate D2E/DX2                !
 ! R14   R(7,10)                 1.2403         estimate D2E/DX2                !
 ! R15   R(7,11)                 1.3606         estimate D2E/DX2                !
 ! R16   R(8,9)                  1.2194         estimate D2E/DX2                !
 ! R17   R(8,30)                 1.3856         estimate D2E/DX2                !
 ! R18   R(8,57)                 1.2934         estimate D2E/DX2                !
 ! R19   R(9,58)                 1.5934         estimate D2E/DX2                !
 ! R20   R(10,40)                1.7373         estimate D2E/DX2                !
 ! R21   R(11,21)                1.3617         estimate D2E/DX2                !
 ! R22   R(11,45)                1.0209         estimate D2E/DX2                !
 ! R23   R(12,13)                1.3756         estimate D2E/DX2                !
 ! R24   R(12,46)                1.0117         estimate D2E/DX2                !
 ! R25   R(13,14)                1.2907         estimate D2E/DX2                !
 ! R26   R(14,15)                1.4644         estimate D2E/DX2                !
 ! R27   R(14,47)                1.0879         estimate D2E/DX2                !
 ! R28   R(15,16)                1.4079         estimate D2E/DX2                !
 ! R29   R(15,20)                1.4176         estimate D2E/DX2                !
 ! R30   R(16,17)                1.3908         estimate D2E/DX2                !
 ! R31   R(16,66)                1.07           estimate D2E/DX2                !
 ! R32   R(17,18)                1.3957         estimate D2E/DX2                !
 ! R33   R(17,48)                1.0852         estimate D2E/DX2                !
 ! R34   R(18,19)                1.393          estimate D2E/DX2                !
 ! R35   R(18,49)                1.0861         estimate D2E/DX2                !
 ! R36   R(19,20)                1.4002         estimate D2E/DX2                !
 ! R37   R(19,50)                1.0887         estimate D2E/DX2                !
 ! R38   R(20,64)                1.43           estimate D2E/DX2                !
 ! R39   R(21,22)                1.2847         estimate D2E/DX2                !
 ! R40   R(22,23)                1.4589         estimate D2E/DX2                !
 ! R41   R(22,51)                1.099          estimate D2E/DX2                !
 ! R42   R(23,24)                1.4177         estimate D2E/DX2                !
 ! R43   R(23,28)                1.4074         estimate D2E/DX2                !
 ! R44   R(24,25)                1.3996         estimate D2E/DX2                !
 ! R45   R(24,29)                1.3569         estimate D2E/DX2                !
 ! R46   R(25,26)                1.3929         estimate D2E/DX2                !
 ! R47   R(25,52)                1.0882         estimate D2E/DX2                !
 ! R48   R(26,27)                1.3963         estimate D2E/DX2                !
 ! R49   R(26,53)                1.0859         estimate D2E/DX2                !
 ! R50   R(27,28)                1.3901         estimate D2E/DX2                !
 ! R51   R(27,54)                1.0849         estimate D2E/DX2                !
 ! R52   R(28,55)                1.0871         estimate D2E/DX2                !
 ! R53   R(29,56)                0.9669         estimate D2E/DX2                !
 ! R54   R(30,31)                1.3593         estimate D2E/DX2                !
 ! R55   R(30,57)                1.019          estimate D2E/DX2                !
 ! R56   R(31,32)                1.2894         estimate D2E/DX2                !
 ! R57   R(31,63)                1.7639         estimate D2E/DX2                !
 ! R58   R(32,33)                1.4525         estimate D2E/DX2                !
 ! R59   R(32,58)                1.0974         estimate D2E/DX2                !
 ! R60   R(33,34)                1.4079         estimate D2E/DX2                !
 ! R61   R(33,38)                1.4233         estimate D2E/DX2                !
 ! R62   R(34,35)                1.3877         estimate D2E/DX2                !
 ! R63   R(34,59)                1.0877         estimate D2E/DX2                !
 ! R64   R(35,36)                1.4019         estimate D2E/DX2                !
 ! R65   R(35,60)                1.0852         estimate D2E/DX2                !
 ! R66   R(36,37)                1.3898         estimate D2E/DX2                !
 ! R67   R(36,61)                1.0865         estimate D2E/DX2                !
 ! R68   R(37,38)                1.4033         estimate D2E/DX2                !
 ! R69   R(37,62)                1.085          estimate D2E/DX2                !
 ! R70   R(38,39)                1.3437         estimate D2E/DX2                !
 ! R71   R(39,63)                0.9891         estimate D2E/DX2                !
 ! R72   R(64,65)                0.96           estimate D2E/DX2                !
 ! A1    A(2,1,40)             105.8711         estimate D2E/DX2                !
 ! A2    A(1,2,3)              109.7175         estimate D2E/DX2                !
 ! A3    A(1,2,4)              111.4164         estimate D2E/DX2                !
 ! A4    A(1,2,5)              109.9972         estimate D2E/DX2                !
 ! A5    A(3,2,4)              106.1811         estimate D2E/DX2                !
 ! A6    A(3,2,5)              106.4486         estimate D2E/DX2                !
 ! A7    A(4,2,5)              112.8587         estimate D2E/DX2                !
 ! A8    A(2,3,6)              120.4094         estimate D2E/DX2                !
 ! A9    A(2,3,12)             113.2782         estimate D2E/DX2                !
 ! A10   A(6,3,12)             126.3087         estimate D2E/DX2                !
 ! A11   A(2,4,7)              112.6845         estimate D2E/DX2                !
 ! A12   A(2,4,41)             107.9948         estimate D2E/DX2                !
 ! A13   A(2,4,42)             110.4291         estimate D2E/DX2                !
 ! A14   A(7,4,41)             106.041          estimate D2E/DX2                !
 ! A15   A(7,4,42)             111.8227         estimate D2E/DX2                !
 ! A16   A(41,4,42)            107.569          estimate D2E/DX2                !
 ! A17   A(2,5,8)              114.4303         estimate D2E/DX2                !
 ! A18   A(2,5,43)             109.3127         estimate D2E/DX2                !
 ! A19   A(2,5,44)             107.1329         estimate D2E/DX2                !
 ! A20   A(8,5,43)             107.865          estimate D2E/DX2                !
 ! A21   A(8,5,44)             109.6115         estimate D2E/DX2                !
 ! A22   A(43,5,44)            108.3478         estimate D2E/DX2                !
 ! A23   A(4,7,10)             121.6779         estimate D2E/DX2                !
 ! A24   A(4,7,11)             118.6644         estimate D2E/DX2                !
 ! A25   A(10,7,11)            119.6332         estimate D2E/DX2                !
 ! A26   A(5,8,9)              123.7285         estimate D2E/DX2                !
 ! A27   A(5,8,30)             113.0207         estimate D2E/DX2                !
 ! A28   A(5,8,57)              89.9348         estimate D2E/DX2                !
 ! A29   A(9,8,30)             123.2484         estimate D2E/DX2                !
 ! A30   A(9,8,57)             130.5433         estimate D2E/DX2                !
 ! A31   A(7,11,21)            122.3409         estimate D2E/DX2                !
 ! A32   A(7,11,45)            115.7779         estimate D2E/DX2                !
 ! A33   A(21,11,45)           121.3883         estimate D2E/DX2                !
 ! A34   A(3,12,13)            131.429          estimate D2E/DX2                !
 ! A35   A(3,12,46)            115.1855         estimate D2E/DX2                !
 ! A36   A(13,12,46)           113.3748         estimate D2E/DX2                !
 ! A37   A(12,13,14)           119.4088         estimate D2E/DX2                !
 ! A38   A(13,14,15)           122.7643         estimate D2E/DX2                !
 ! A39   A(13,14,47)           121.6781         estimate D2E/DX2                !
 ! A40   A(15,14,47)           115.5575         estimate D2E/DX2                !
 ! A41   A(14,15,16)           116.5019         estimate D2E/DX2                !
 ! A42   A(14,15,20)           125.9943         estimate D2E/DX2                !
 ! A43   A(16,15,20)           117.5037         estimate D2E/DX2                !
 ! A44   A(15,16,17)           122.553          estimate D2E/DX2                !
 ! A45   A(15,16,66)           118.7235         estimate D2E/DX2                !
 ! A46   A(17,16,66)           118.7235         estimate D2E/DX2                !
 ! A47   A(16,17,18)           119.035          estimate D2E/DX2                !
 ! A48   A(16,17,48)           120.3277         estimate D2E/DX2                !
 ! A49   A(18,17,48)           120.6374         estimate D2E/DX2                !
 ! A50   A(17,18,19)           119.9454         estimate D2E/DX2                !
 ! A51   A(17,18,49)           120.5241         estimate D2E/DX2                !
 ! A52   A(19,18,49)           119.5306         estimate D2E/DX2                !
 ! A53   A(18,19,20)           121.0618         estimate D2E/DX2                !
 ! A54   A(18,19,50)           120.0159         estimate D2E/DX2                !
 ! A55   A(20,19,50)           118.9223         estimate D2E/DX2                !
 ! A56   A(15,20,19)           119.9012         estimate D2E/DX2                !
 ! A57   A(15,20,64)           120.0494         estimate D2E/DX2                !
 ! A58   A(19,20,64)           120.0494         estimate D2E/DX2                !
 ! A59   A(11,21,22)           116.6324         estimate D2E/DX2                !
 ! A60   A(21,22,23)           124.5268         estimate D2E/DX2                !
 ! A61   A(21,22,51)           120.5296         estimate D2E/DX2                !
 ! A62   A(23,22,51)           114.9425         estimate D2E/DX2                !
 ! A63   A(22,23,24)           124.7553         estimate D2E/DX2                !
 ! A64   A(22,23,28)           117.3805         estimate D2E/DX2                !
 ! A65   A(24,23,28)           117.8622         estimate D2E/DX2                !
 ! A66   A(23,24,25)           119.7749         estimate D2E/DX2                !
 ! A67   A(23,24,29)           118.8254         estimate D2E/DX2                !
 ! A68   A(25,24,29)           121.3997         estimate D2E/DX2                !
 ! A69   A(24,25,26)           120.9251         estimate D2E/DX2                !
 ! A70   A(24,25,52)           118.9796         estimate D2E/DX2                !
 ! A71   A(26,25,52)           120.0954         estimate D2E/DX2                !
 ! A72   A(25,26,27)           120.1188         estimate D2E/DX2                !
 ! A73   A(25,26,53)           119.4727         estimate D2E/DX2                !
 ! A74   A(27,26,53)           120.4084         estimate D2E/DX2                !
 ! A75   A(26,27,28)           119.0684         estimate D2E/DX2                !
 ! A76   A(26,27,54)           120.6269         estimate D2E/DX2                !
 ! A77   A(28,27,54)           120.3045         estimate D2E/DX2                !
 ! A78   A(23,28,27)           122.2506         estimate D2E/DX2                !
 ! A79   A(23,28,55)           118.1612         estimate D2E/DX2                !
 ! A80   A(27,28,55)           119.5878         estimate D2E/DX2                !
 ! A81   A(24,29,56)           109.0427         estimate D2E/DX2                !
 ! A82   A(8,30,31)            119.3541         estimate D2E/DX2                !
 ! A83   A(31,30,57)           119.6072         estimate D2E/DX2                !
 ! A84   A(30,31,32)           119.2309         estimate D2E/DX2                !
 ! A85   A(31,32,33)           120.92           estimate D2E/DX2                !
 ! A86   A(31,32,58)           121.4502         estimate D2E/DX2                !
 ! A87   A(33,32,58)           117.6292         estimate D2E/DX2                !
 ! A88   A(32,33,34)           119.6222         estimate D2E/DX2                !
 ! A89   A(32,33,38)           121.4886         estimate D2E/DX2                !
 ! A90   A(34,33,38)           118.8878         estimate D2E/DX2                !
 ! A91   A(33,34,35)           121.48           estimate D2E/DX2                !
 ! A92   A(33,34,59)           118.4637         estimate D2E/DX2                !
 ! A93   A(35,34,59)           120.0563         estimate D2E/DX2                !
 ! A94   A(34,35,36)           119.0839         estimate D2E/DX2                !
 ! A95   A(34,35,60)           120.3904         estimate D2E/DX2                !
 ! A96   A(36,35,60)           120.5257         estimate D2E/DX2                !
 ! A97   A(35,36,37)           120.7934         estimate D2E/DX2                !
 ! A98   A(35,36,61)           119.8735         estimate D2E/DX2                !
 ! A99   A(37,36,61)           119.333          estimate D2E/DX2                !
 ! A100  A(36,37,38)           120.556          estimate D2E/DX2                !
 ! A101  A(36,37,62)           121.5244         estimate D2E/DX2                !
 ! A102  A(38,37,62)           117.9196         estimate D2E/DX2                !
 ! A103  A(33,38,37)           119.1988         estimate D2E/DX2                !
 ! A104  A(33,38,39)           122.7897         estimate D2E/DX2                !
 ! A105  A(37,38,39)           118.0113         estimate D2E/DX2                !
 ! A106  A(38,39,63)           108.8071         estimate D2E/DX2                !
 ! A107  A(20,64,65)           109.5            estimate D2E/DX2                !
 ! D1    D(40,1,2,3)          -142.1864         estimate D2E/DX2                !
 ! D2    D(40,1,2,4)           -24.8921         estimate D2E/DX2                !
 ! D3    D(40,1,2,5)           101.0368         estimate D2E/DX2                !
 ! D4    D(1,2,3,6)           -174.6904         estimate D2E/DX2                !
 ! D5    D(1,2,3,12)             5.9671         estimate D2E/DX2                !
 ! D6    D(4,2,3,6)             64.7868         estimate D2E/DX2                !
 ! D7    D(4,2,3,12)          -114.5557         estimate D2E/DX2                !
 ! D8    D(5,2,3,6)            -55.7049         estimate D2E/DX2                !
 ! D9    D(5,2,3,12)           124.9526         estimate D2E/DX2                !
 ! D10   D(1,2,4,7)             49.2225         estimate D2E/DX2                !
 ! D11   D(1,2,4,41)           -67.564          estimate D2E/DX2                !
 ! D12   D(1,2,4,42)           175.0704         estimate D2E/DX2                !
 ! D13   D(3,2,4,7)            168.6398         estimate D2E/DX2                !
 ! D14   D(3,2,4,41)            51.8533         estimate D2E/DX2                !
 ! D15   D(3,2,4,42)           -65.5123         estimate D2E/DX2                !
 ! D16   D(5,2,4,7)            -75.1101         estimate D2E/DX2                !
 ! D17   D(5,2,4,41)           168.1034         estimate D2E/DX2                !
 ! D18   D(5,2,4,42)            50.7378         estimate D2E/DX2                !
 ! D19   D(1,2,5,8)            -62.3194         estimate D2E/DX2                !
 ! D20   D(1,2,5,43)           176.6011         estimate D2E/DX2                !
 ! D21   D(1,2,5,44)            59.4026         estimate D2E/DX2                !
 ! D22   D(3,2,5,8)            178.8781         estimate D2E/DX2                !
 ! D23   D(3,2,5,43)            57.7987         estimate D2E/DX2                !
 ! D24   D(3,2,5,44)           -59.3998         estimate D2E/DX2                !
 ! D25   D(4,2,5,8)             62.7874         estimate D2E/DX2                !
 ! D26   D(4,2,5,43)           -58.292          estimate D2E/DX2                !
 ! D27   D(4,2,5,44)          -175.4905         estimate D2E/DX2                !
 ! D28   D(2,3,12,13)         -179.6968         estimate D2E/DX2                !
 ! D29   D(2,3,12,46)           -0.9838         estimate D2E/DX2                !
 ! D30   D(6,3,12,13)            1.0069         estimate D2E/DX2                !
 ! D31   D(6,3,12,46)          179.7199         estimate D2E/DX2                !
 ! D32   D(2,4,7,10)           -43.1222         estimate D2E/DX2                !
 ! D33   D(2,4,7,11)           138.6843         estimate D2E/DX2                !
 ! D34   D(41,4,7,10)           74.8199         estimate D2E/DX2                !
 ! D35   D(41,4,7,11)         -103.3736         estimate D2E/DX2                !
 ! D36   D(42,4,7,10)         -168.2143         estimate D2E/DX2                !
 ! D37   D(42,4,7,11)           13.5922         estimate D2E/DX2                !
 ! D38   D(2,5,8,9)           -105.4767         estimate D2E/DX2                !
 ! D39   D(2,5,8,30)            75.0716         estimate D2E/DX2                !
 ! D40   D(2,5,8,57)            35.859          estimate D2E/DX2                !
 ! D41   D(43,5,8,9)            16.3981         estimate D2E/DX2                !
 ! D42   D(43,5,8,30)         -163.0537         estimate D2E/DX2                !
 ! D43   D(43,5,8,57)          157.7337         estimate D2E/DX2                !
 ! D44   D(44,5,8,9)           134.1694         estimate D2E/DX2                !
 ! D45   D(44,5,8,30)          -45.2824         estimate D2E/DX2                !
 ! D46   D(44,5,8,57)          -84.495          estimate D2E/DX2                !
 ! D47   D(4,7,11,21)           -4.0386         estimate D2E/DX2                !
 ! D48   D(4,7,11,45)         -176.0822         estimate D2E/DX2                !
 ! D49   D(10,7,11,21)         177.7301         estimate D2E/DX2                !
 ! D50   D(10,7,11,45)           5.6865         estimate D2E/DX2                !
 ! D51   D(5,8,30,31)         -174.7482         estimate D2E/DX2                !
 ! D52   D(9,8,30,31)            5.797          estimate D2E/DX2                !
 ! D53   D(7,11,21,22)        -173.7594         estimate D2E/DX2                !
 ! D54   D(45,11,21,22)         -2.1554         estimate D2E/DX2                !
 ! D55   D(3,12,13,14)         180.0            estimate D2E/DX2                !
 ! D56   D(46,12,13,14)          1.2688         estimate D2E/DX2                !
 ! D57   D(12,13,14,15)        179.8059         estimate D2E/DX2                !
 ! D58   D(12,13,14,47)         -0.0838         estimate D2E/DX2                !
 ! D59   D(13,14,15,16)       -179.8933         estimate D2E/DX2                !
 ! D60   D(13,14,15,20)          0.0216         estimate D2E/DX2                !
 ! D61   D(47,14,15,16)          0.0026         estimate D2E/DX2                !
 ! D62   D(47,14,15,20)        179.9175         estimate D2E/DX2                !
 ! D63   D(14,15,16,17)        179.9141         estimate D2E/DX2                !
 ! D64   D(14,15,16,66)         -0.0859         estimate D2E/DX2                !
 ! D65   D(20,15,16,17)         -0.0083         estimate D2E/DX2                !
 ! D66   D(20,15,16,66)        179.9917         estimate D2E/DX2                !
 ! D67   D(14,15,20,19)       -179.9004         estimate D2E/DX2                !
 ! D68   D(14,15,20,64)          0.0996         estimate D2E/DX2                !
 ! D69   D(16,15,20,19)          0.0138         estimate D2E/DX2                !
 ! D70   D(16,15,20,64)       -179.9862         estimate D2E/DX2                !
 ! D71   D(15,16,17,18)         -0.0038         estimate D2E/DX2                !
 ! D72   D(15,16,17,48)       -179.9737         estimate D2E/DX2                !
 ! D73   D(66,16,17,18)        179.9962         estimate D2E/DX2                !
 ! D74   D(66,16,17,48)          0.0263         estimate D2E/DX2                !
 ! D75   D(16,17,18,19)          0.0104         estimate D2E/DX2                !
 ! D76   D(16,17,18,49)       -179.9797         estimate D2E/DX2                !
 ! D77   D(48,17,18,19)        179.9803         estimate D2E/DX2                !
 ! D78   D(48,17,18,49)         -0.0098         estimate D2E/DX2                !
 ! D79   D(17,18,19,20)         -0.0049         estimate D2E/DX2                !
 ! D80   D(17,18,19,50)       -179.9942         estimate D2E/DX2                !
 ! D81   D(49,18,19,20)        179.9853         estimate D2E/DX2                !
 ! D82   D(49,18,19,50)         -0.004          estimate D2E/DX2                !
 ! D83   D(18,19,20,15)         -0.0075         estimate D2E/DX2                !
 ! D84   D(18,19,20,64)        179.9925         estimate D2E/DX2                !
 ! D85   D(50,19,20,15)        179.9819         estimate D2E/DX2                !
 ! D86   D(50,19,20,64)         -0.0181         estimate D2E/DX2                !
 ! D87   D(15,20,64,65)        177.8034         estimate D2E/DX2                !
 ! D88   D(19,20,64,65)         -2.1966         estimate D2E/DX2                !
 ! D89   D(11,21,22,23)        179.8054         estimate D2E/DX2                !
 ! D90   D(11,21,22,51)          0.1972         estimate D2E/DX2                !
 ! D91   D(21,22,23,24)         -1.1518         estimate D2E/DX2                !
 ! D92   D(21,22,23,28)        179.3754         estimate D2E/DX2                !
 ! D93   D(51,22,23,24)        178.4759         estimate D2E/DX2                !
 ! D94   D(51,22,23,28)         -0.9968         estimate D2E/DX2                !
 ! D95   D(22,23,24,25)       -179.4188         estimate D2E/DX2                !
 ! D96   D(22,23,24,29)          0.5986         estimate D2E/DX2                !
 ! D97   D(28,23,24,25)          0.0516         estimate D2E/DX2                !
 ! D98   D(28,23,24,29)       -179.931          estimate D2E/DX2                !
 ! D99   D(22,23,28,27)        179.5176         estimate D2E/DX2                !
 ! D100  D(22,23,28,55)         -0.2592         estimate D2E/DX2                !
 ! D101  D(24,23,28,27)          0.0076         estimate D2E/DX2                !
 ! D102  D(24,23,28,55)       -179.7692         estimate D2E/DX2                !
 ! D103  D(23,24,25,26)         -0.0618         estimate D2E/DX2                !
 ! D104  D(23,24,25,52)        179.9118         estimate D2E/DX2                !
 ! D105  D(29,24,25,26)        179.9203         estimate D2E/DX2                !
 ! D106  D(29,24,25,52)         -0.1061         estimate D2E/DX2                !
 ! D107  D(23,24,29,56)       -177.8632         estimate D2E/DX2                !
 ! D108  D(25,24,29,56)          2.1545         estimate D2E/DX2                !
 ! D109  D(24,25,26,27)          0.0116         estimate D2E/DX2                !
 ! D110  D(24,25,26,53)        179.9635         estimate D2E/DX2                !
 ! D111  D(52,25,26,27)       -179.9617         estimate D2E/DX2                !
 ! D112  D(52,25,26,53)         -0.0098         estimate D2E/DX2                !
 ! D113  D(25,26,27,28)          0.0473         estimate D2E/DX2                !
 ! D114  D(25,26,27,54)        179.9064         estimate D2E/DX2                !
 ! D115  D(53,26,27,28)       -179.9042         estimate D2E/DX2                !
 ! D116  D(53,26,27,54)         -0.0451         estimate D2E/DX2                !
 ! D117  D(26,27,28,23)         -0.0572         estimate D2E/DX2                !
 ! D118  D(26,27,28,55)        179.7165         estimate D2E/DX2                !
 ! D119  D(54,27,28,23)       -179.9167         estimate D2E/DX2                !
 ! D120  D(54,27,28,55)         -0.143          estimate D2E/DX2                !
 ! D121  D(8,30,31,32)           1.0            estimate D2E/DX2                !
 ! D122  D(57,30,31,32)        -72.6795         estimate D2E/DX2                !
 ! D123  D(30,31,32,33)       -179.9499         estimate D2E/DX2                !
 ! D124  D(30,31,32,58)         -0.2306         estimate D2E/DX2                !
 ! D125  D(31,32,33,34)       -179.2381         estimate D2E/DX2                !
 ! D126  D(31,32,33,38)          1.197          estimate D2E/DX2                !
 ! D127  D(58,32,33,34)          1.0322         estimate D2E/DX2                !
 ! D128  D(58,32,33,38)       -178.5327         estimate D2E/DX2                !
 ! D129  D(32,33,34,35)       -179.6878         estimate D2E/DX2                !
 ! D130  D(32,33,34,59)          0.3002         estimate D2E/DX2                !
 ! D131  D(38,33,34,35)         -0.1117         estimate D2E/DX2                !
 ! D132  D(38,33,34,59)        179.8763         estimate D2E/DX2                !
 ! D133  D(32,33,38,37)        179.6482         estimate D2E/DX2                !
 ! D134  D(32,33,38,39)         -0.1943         estimate D2E/DX2                !
 ! D135  D(34,33,38,37)          0.0802         estimate D2E/DX2                !
 ! D136  D(34,33,38,39)       -179.7622         estimate D2E/DX2                !
 ! D137  D(33,34,35,36)          0.0536         estimate D2E/DX2                !
 ! D138  D(33,34,35,60)       -179.9564         estimate D2E/DX2                !
 ! D139  D(59,34,35,36)       -179.9342         estimate D2E/DX2                !
 ! D140  D(59,34,35,60)          0.0558         estimate D2E/DX2                !
 ! D141  D(34,35,36,37)          0.0367         estimate D2E/DX2                !
 ! D142  D(34,35,36,61)       -179.9728         estimate D2E/DX2                !
 ! D143  D(60,35,36,37)       -179.9533         estimate D2E/DX2                !
 ! D144  D(60,35,36,61)          0.0371         estimate D2E/DX2                !
 ! D145  D(35,36,37,38)         -0.0666         estimate D2E/DX2                !
 ! D146  D(35,36,37,62)        179.9822         estimate D2E/DX2                !
 ! D147  D(61,36,37,38)        179.9429         estimate D2E/DX2                !
 ! D148  D(61,36,37,62)         -0.0082         estimate D2E/DX2                !
 ! D149  D(36,37,38,33)          0.0069         estimate D2E/DX2                !
 ! D150  D(36,37,38,39)        179.8569         estimate D2E/DX2                !
 ! D151  D(62,37,38,33)        179.9597         estimate D2E/DX2                !
 ! D152  D(62,37,38,39)         -0.1903         estimate D2E/DX2                !
 ! D153  D(33,38,39,63)         -0.4591         estimate D2E/DX2                !
 ! D154  D(37,38,39,63)        179.6967         estimate D2E/DX2                !
 --------------------------------------------------------------------------------
 Trust Radius=3.00D-01 FncErr=1.00D-07 GrdErr=1.00D-06
 Number of steps in this run=    343 maximum allowed number of steps=    396.
 GradGradGradGradGradGradGradGradGradGradGradGradGradGradGradGradGradGrad

 Leave Link  103 at Thu Oct 13 22:36:02 2016, MaxMem= 1342177280 cpu:       0.6
 (Enter /opt/software/g09/l202.exe)
 Stoichiometry    C27H26N6O7
 Framework group  C1[X(C27H26N6O7)]
 Deg. of freedom   192
 Full point group                 C1      NOp   1
 Largest Abelian subgroup         C1      NOp   1
 Largest concise Abelian subgroup C1      NOp   1
                         Standard orientation:                         
 ---------------------------------------------------------------------
 Center     Atomic      Atomic             Coordinates (Angstroms)
 Number     Number       Type             X           Y           Z
 ---------------------------------------------------------------------
      1          8           0       -1.324162   -1.513922    0.522798
      2          6           0       -1.088144   -0.275776   -0.149370
      3          6           0       -2.442602    0.371337   -0.546228
      4          6           0       -0.375124    0.746635    0.778479
      5          6           0       -0.316707   -0.528955   -1.473948
      6          8           0       -2.467429    1.397447   -1.221992
      7          6           0        0.836622    0.158566    1.474521
      8          6           0        1.065660   -1.142984   -1.290624
      9          8           0        2.105852   -0.520275   -1.421264
     10          8           0        0.814093   -0.976831    1.973197
     11          7           0        1.960550    0.917982    1.581107
     12          7           0       -3.523457   -0.301876   -0.061649
     13          7           0       -4.873116   -0.067490   -0.187232
     14          6           0       -5.711076   -0.869589    0.378880
     15          6           0       -7.161805   -0.687532    0.296433
     16          6           0       -7.953569   -1.640038    0.965828
     17          6           0       -9.343318   -1.587033    0.971424
     18          6           0       -9.984467   -0.552064    0.289040
     19          6           0       -9.232161    0.407747   -0.384298
     20          6           0       -7.832918    0.355166   -0.390611
     21          7           0        2.061650    2.152764    1.016096
     22          6           0        3.211589    2.722164    1.078359
     23          6           0        3.513115    4.039109    0.527738
     24          6           0        2.586510    4.855458   -0.168513
     25          6           0        2.992126    6.099787   -0.664575
     26          6           0        4.297096    6.551798   -0.483379
     27          6           0        5.223474    5.762164    0.200689
     28          6           0        4.823461    4.525364    0.693288
     29          8           0        1.317396    4.406377   -0.338111
     30          7           0        1.021956   -2.490363   -0.970571
     31          7           0        2.176915   -3.142291   -0.672767
     32          6           0        3.287944   -2.487994   -0.675386
     33          6           0        4.543617   -3.148173   -0.363702
     34          6           0        5.738681   -2.403886   -0.358811
     35          6           0        6.960412   -2.996635   -0.072741
     36          6           0        7.001530   -4.367847    0.216280
     37          6           0        5.839302   -5.129870    0.217506
     38          6           0        4.599025   -4.539742   -0.069869
     39          8           0        3.508576   -5.324829   -0.057344
     40          1           0       -0.644807   -1.567049    1.237310
     41          1           0       -1.075905    1.027678    1.575236
     42          1           0       -0.125417    1.651022    0.226392
     43          1           0       -0.195652    0.414300   -2.006552
     44          1           0       -0.936352   -1.193959   -2.086440
     45          1           0        2.769076    0.457824    2.001624
     46          1           0       -3.308515   -1.133275    0.473201
     47          1           0       -5.378072   -1.730755    0.954242
     48          1           0       -9.918279   -2.340493    1.499921
     49          1           0      -11.068571   -0.487157    0.277837
     50          1           0       -9.731081    1.215593   -0.916864
     51          1           0        4.058422    2.218319    1.565003
     52          1           0        2.270635    6.715229   -1.198304
     53          1           0        4.586580    7.520909   -0.878669
     54          1           0        6.242434    6.105461    0.345227
     55          1           0        5.539024    3.901683    1.223119
     56          1           0        0.820201    5.053934   -0.856068
     57          1           0        0.622408   -1.840085   -0.295374
     58          1           0        3.321676   -1.417848   -0.916308
     59          1           0        5.688627   -1.341396   -0.586308
     60          1           0        7.870685   -2.405913   -0.073224
     61          1           0        7.951074   -4.844993    0.442479
     62          1           0        5.857443   -6.191872    0.439214
     63          1           0        2.716015   -4.773170   -0.271380
     64          8           0       -7.082038    1.351784   -1.089060
     65          1           0       -7.683879    1.959469   -1.525071
     66          1           0       -7.467196   -2.435602    1.490633
 ---------------------------------------------------------------------
 Rotational constants (GHZ):      0.0944821      0.0391155      0.0289380
 Leave Link  202 at Thu Oct 13 22:36:03 2016, MaxMem= 1342177280 cpu:       1.3
 (Enter /opt/software/g09/l301.exe)
 General basis read from cards:  (5D, 7F)
 Centers:   2  3  4  5  7  8 14 15 16 17 18 19 20 22 23 24 25 26 27 28
 Centers:  32 33 34 35 36 37 38 40 41 42 43 44 45 46 47 48 49 50 51 52
 Centers:  53 54 55 56 57 58 59 60 61 62 63 65 66 11 12 13 21 30 31  1
 Centers:   6  9 10 29 39 64
 6-31G**
 ****
 Ernie: Thresh=  0.10000D-02 Tol=  0.10000D-05 Strict=F.
 ======================================================================================================
                                       Pseudopotential Parameters
 ======================================================================================================
  Center     Atomic      Valence      Angular      Power
  Number     Number     Electrons     Momentum     of R      Exponent        Coefficient   SO-Coeffient
 ======================================================================================================
    1          8
                                   No pseudopotential on this center.
    2          6
                                   No pseudopotential on this center.
    3          6
                                   No pseudopotential on this center.
    4          6
                                   No pseudopotential on this center.
    5          6
                                   No pseudopotential on this center.
    6          8
                                   No pseudopotential on this center.
    7          6
                                   No pseudopotential on this center.
    8          6
                                   No pseudopotential on this center.
    9          8
                                   No pseudopotential on this center.
   10          8
                                   No pseudopotential on this center.
   11          7
                                   No pseudopotential on this center.
   12          7
                                   No pseudopotential on this center.
   13          7
                                   No pseudopotential on this center.
   14          6
                                   No pseudopotential on this center.
   15          6
                                   No pseudopotential on this center.
   16          6
                                   No pseudopotential on this center.
   17          6
                                   No pseudopotential on this center.
   18          6
                                   No pseudopotential on this center.
   19          6
                                   No pseudopotential on this center.
   20          6
                                   No pseudopotential on this center.
   21          7
                                   No pseudopotential on this center.
   22          6
                                   No pseudopotential on this center.
   23          6
                                   No pseudopotential on this center.
   24          6
                                   No pseudopotential on this center.
   25          6
                                   No pseudopotential on this center.
   26          6
                                   No pseudopotential on this center.
   27          6
                                   No pseudopotential on this center.
   28          6
                                   No pseudopotential on this center.
   29          8
                                   No pseudopotential on this center.
   30          7
                                   No pseudopotential on this center.
   31          7
                                   No pseudopotential on this center.
   32          6
                                   No pseudopotential on this center.
   33          6
                                   No pseudopotential on this center.
   34          6
                                   No pseudopotential on this center.
   35          6
                                   No pseudopotential on this center.
   36          6
                                   No pseudopotential on this center.
   37          6
                                   No pseudopotential on this center.
   38          6
                                   No pseudopotential on this center.
   39          8
                                   No pseudopotential on this center.
   40          1
                                   No pseudopotential on this center.
   41          1
                                   No pseudopotential on this center.
   42          1
                                   No pseudopotential on this center.
   43          1
                                   No pseudopotential on this center.
   44          1
                                   No pseudopotential on this center.
   45          1
                                   No pseudopotential on this center.
   46          1
                                   No pseudopotential on this center.
   47          1
                                   No pseudopotential on this center.
   48          1
                                   No pseudopotential on this center.
   49          1
                                   No pseudopotential on this center.
   50          1
                                   No pseudopotential on this center.
   51          1
                                   No pseudopotential on this center.
   52          1
                                   No pseudopotential on this center.
   53          1
                                   No pseudopotential on this center.
   54          1
                                   No pseudopotential on this center.
   55          1
                                   No pseudopotential on this center.
   56          1
                                   No pseudopotential on this center.
   57          1
                                   No pseudopotential on this center.
   58          1
                                   No pseudopotential on this center.
   59          1
                                   No pseudopotential on this center.
   60          1
                                   No pseudopotential on this center.
   61          1
                                   No pseudopotential on this center.
   62          1
                                   No pseudopotential on this center.
   63          1
                                   No pseudopotential on this center.
   64          8
                                   No pseudopotential on this center.
   65          1
                                   No pseudopotential on this center.
   66          1
                                   No pseudopotential on this center.
 ======================================================================================================
 There are   690 symmetry adapted basis functions of A   symmetry.
 Integral buffers will be    131072 words long.
 Raffenetti 2 integral format.
 Two-electron integral symmetry is turned on.
   690 basis functions,  1302 primitive gaussians,   730 cartesian basis functions
   143 alpha electrons      143 beta electrons
       nuclear repulsion energy      4219.7958180725 Hartrees.
 IExCor=  402 DFT=T Ex+Corr=B3LYP ExCW=0 ScaHFX=  0.200000
 ScaDFX=  0.800000  0.720000  1.000000  0.810000 ScalE2=  1.000000  1.000000
 IRadAn=      0 IRanWt=     -1 IRanGd=            0 ICorTp=0
 NAtoms=   66 NActive=   66 NUniq=   66 SFac= 1.00D+00 NAtFMM=   50 NAOKFM=T Big=T
 ------------------------------------------------------------------------------
 Polarizable Continuum Model (PCM)
 =================================
 Model                : PCM.
 Atomic radii         : UFF (Universal Force Field).
 Polarization charges : Total charges.
 Charge compensation  : None.
 Solution method      : Matrix inversion.
 Cavity type          : Scaled VdW (van der Waals Surface) (Alpha=1.100).
 Cavity algorithm     : GePol (No added spheres)
                        Default sphere list used, NSphG=   66.
                        Lebedev-Laikov grids with approx.  5.0 points / Ang**2.
                        Smoothing algorithm: Karplus/York (Gamma=1.0000).
                        Polarization charges: spherical gaussians, with
                                              point-specific exponents (IZeta= 3).
                        Self-potential: point-specific (ISelfS= 7).
                        Self-field    : sphere-specific E.n sum rule (ISelfD= 2).
 1st derivatives      : Analytical E(r).r(x)/FMM algorithm (CHGder, D1EAlg=3).
                        Cavity 1st derivative terms included.
 Solvent              : Water, Eps=  78.355300 Eps(inf)=   1.777849
 ------------------------------------------------------------------------------
 GePol: Number of generator spheres                  =      66
 GePol: Total number of spheres                      =      66
 GePol: Number of exposed spheres                    =      66 (100.00%)
 GePol: Number of points                             =    4934
 GePol: Average weight of points                     =       0.13
 GePol: Minimum weight of points                     =   0.51D-11
 GePol: Maximum weight of points                     =    0.20577
 GePol: Number of points with low weight             =     325
 GePol: Fraction of low-weight points (<1% of avg)   =       6.59%
 GePol: Cavity surface area                          =    633.364 Ang**2
 GePol: Cavity volume                                =    705.177 Ang**3
 Leave Link  301 at Thu Oct 13 22:36:03 2016, MaxMem= 1342177280 cpu:       2.8
 (Enter /opt/software/g09/linda-exe/l302.exel)
 NPDir=0 NMtPBC=     1 NCelOv=     1 NCel=       1 NClECP=     1 NCelD=      1
         NCelK=      1 NCelE2=     1 NClLst=     1 CellRange=     0.0.
 One-electron integrals computed using PRISM.
   1 Symmetry operations used in ECPInt.
 ECPInt:  NShTT=   28441 NPrTT=  163533 LenC2=   16061 LenP2D=   49407.
 LDataN:  DoStor=T MaxTD1= 4 Len=   56
 NBasis=   690 RedAO= T  NBF=   690
 NBsUse=   690 1.00D-06 NBFU=   690
 Precomputing XC quadrature grid using
 IXCGrd= 2 IRadAn=           0 IRanWt=          -1 IRanGd=           0 AccXCQ= 0.00D+00.
 NRdTot=    4293 NPtTot=      549684 NUsed=      580606 NTot=      580638
 NSgBfM=   596   596   596   603   605 NAtAll=    66    66.
 Leave Link  302 at Thu Oct 13 22:36:08 2016, MaxMem= 1342177280 cpu:      90.9
 (Enter /opt/software/g09/l303.exe)
 DipDrv:  MaxL=1.
 Leave Link  303 at Thu Oct 13 22:36:09 2016, MaxMem= 1342177280 cpu:       5.6
 (Enter /opt/software/g09/linda-exe/l401.exel)
 Harris functional with IExCor=  402 diagonalized for initial guess.
 ExpMin= 1.61D-01 ExpMax= 5.48D+03 ExpMxC= 8.25D+02 IAcc=1 IRadAn=         1 AccDes= 0.00D+00
 HarFok:  IExCor=  402 AccDes= 0.00D+00 IRadAn=         1 IDoV= 1
 ScaDFX=  1.000000  1.000000  1.000000  1.000000
 FoFCou: FMM=F IPFlag=           0 FMFlag=      100000 FMFlg1=        2001
         NFxFlg=           0 DoJE=T BraDBF=F KetDBF=T FulRan=T
         Omega=  0.000000  0.000000  1.000000  0.000000  0.000000 ICntrl=     500 IOpCl=  0
         NMat0=    1 NMatS0=    1 NMatT0=    0 NMatD0=    1 NMtDS0=    0 NMtDT0=    0
         I1Cent=           4 NGrid=           0.
 Petite list used in FoFCou.
 Harris En= -1899.29040100369    
 Initial guess orbital symmetries:
 Alpha Orbitals:
       Occupied  (A) (A) (A) (A) (A) (A) (A) (A) (A) (A) (A) (A)
                 (A) (A) (A) (A) (A) (A) (A) (A) (A) (A) (A) (A)
                 (A) (A) (A) (A) (A) (A) (A) (A) (A) (A) (A) (A)
                 (A) (A) (A) (A) (A) (A) (A) (A) (A) (A) (A) (A)
                 (A) (A) (A) (A) (A) (A) (A) (A) (A) (A) (A) (A)
                 (A) (A) (A) (A) (A) (A) (A) (A) (A) (A) (A) (A)
                 (A) (A) (A) (A) (A) (A) (A) (A) (A) (A) (A) (A)
                 (A) (A) (A) (A) (A) (A) (A) (A) (A) (A) (A) (A)
                 (A) (A) (A) (A) (A) (A) (A) (A) (A) (A) (A) (A)
                 (A) (A) (A) (A) (A) (A) (A) (A) (A) (A) (A) (A)
                 (A) (A) (A) (A) (A) (A) (A) (A) (A) (A) (A) (A)
                 (A) (A) (A) (A) (A) (A) (A) (A) (A) (A) (A)
       Virtual   (A) (A) (A) (A) (A) (A) (A) (A) (A) (A) (A) (A)
                 (A) (A) (A) (A) (A) (A) (A) (A) (A) (A) (A) (A)
                 (A) (A) (A) (A) (A) (A) (A) (A) (A) (A) (A) (A)
                 (A) (A) (A) (A) (A) (A) (A) (A) (A) (A) (A) (A)
                 (A) (A) (A) (A) (A) (A) (A) (A) (A) (A) (A) (A)
                 (A) (A) (A) (A) (A) (A) (A) (A) (A) (A) (A) (A)
                 (A) (A) (A) (A) (A) (A) (A) (A) (A) (A) (A) (A)
                 (A) (A) (A) (A) (A) (A) (A) (A) (A) (A) (A) (A)
                 (A) (A) (A) (A) (A) (A) (A) (A) (A) (A) (A) (A)
                 (A) (A) (A) (A) (A) (A) (A) (A) (A) (A) (A) (A)
                 (A) (A) (A) (A) (A) (A) (A) (A) (A) (A) (A) (A)
                 (A) (A) (A) (A) (A) (A) (A) (A) (A) (A) (A) (A)
                 (A) (A) (A) (A) (A) (A) (A) (A) (A) (A) (A) (A)
                 (A) (A) (A) (A) (A) (A) (A) (A) (A) (A) (A) (A)
                 (A) (A) (A) (A) (A) (A) (A) (A) (A) (A) (A) (A)
                 (A) (A) (A) (A) (A) (A) (A) (A) (A) (A) (A) (A)
                 (A) (A) (A) (A) (A) (A) (A) (A) (A) (A) (A) (A)
                 (A) (A) (A) (A) (A) (A) (A) (A) (A) (A) (A) (A)
                 (A) (A) (A) (A) (A) (A) (A) (A) (A) (A) (A) (A)
                 (A) (A) (A) (A) (A) (A) (A) (A) (A) (A) (A) (A)
                 (A) (A) (A) (A) (A) (A) (A) (A) (A) (A) (A) (A)
                 (A) (A) (A) (A) (A) (A) (A) (A) (A) (A) (A) (A)
                 (A) (A) (A) (A) (A) (A) (A) (A) (A) (A) (A) (A)
                 (A) (A) (A) (A) (A) (A) (A) (A) (A) (A) (A) (A)
                 (A) (A) (A) (A) (A) (A) (A) (A) (A) (A) (A) (A)
                 (A) (A) (A) (A) (A) (A) (A) (A) (A) (A) (A) (A)
                 (A) (A) (A) (A) (A) (A) (A) (A) (A) (A) (A) (A)
                 (A) (A) (A) (A) (A) (A) (A) (A) (A) (A) (A) (A)
                 (A) (A) (A) (A) (A) (A) (A) (A) (A) (A) (A) (A)
                 (A) (A) (A) (A) (A) (A) (A) (A) (A) (A) (A) (A)
                 (A) (A) (A) (A) (A) (A) (A) (A) (A) (A) (A) (A)
                 (A) (A) (A) (A) (A) (A) (A) (A) (A) (A) (A) (A)
                 (A) (A) (A) (A) (A) (A) (A) (A) (A) (A) (A) (A)
                 (A) (A) (A) (A) (A) (A) (A) (A) (A) (A) (A) (A)
                 (A) (A) (A) (A) (A) (A) (A) (A) (A) (A) (A) (A)
                 (A) (A) (A) (A) (A) (A) (A) (A) (A) (A) (A) (A)
                 (A) (A) (A) (A) (A) (A) (A) (A) (A) (A) (A) (A)
                 (A) (A) (A) (A) (A) (A) (A) (A) (A) (A) (A) (A)
                 (A) (A) (A) (A) (A) (A) (A) (A) (A) (A) (A) (A)
                 (A) (A) (A) (A) (A) (A) (A) (A) (A) (A) (A) (A)
                 (A) (A) (A) (A) (A) (A) (A) (A) (A) (A) (A) (A)
                 (A) (A) (A) (A) (A) (A) (A) (A) (A) (A) (A) (A)
                 (A) (A) (A) (A) (A) (A) (A) (A) (A) (A) (A) (A)
                 (A) (A) (A) (A) (A) (A) (A) (A) (A) (A) (A) (A)
                 (A) (A) (A) (A) (A) (A) (A) (A) (A) (A) (A) (A)
                 (A) (A) (A) (A) (A) (A) (A)
 Beta  Orbitals:
       Occupied  (A) (A) (A) (A) (A) (A) (A) (A) (A) (A) (A) (A)
                 (A) (A) (A) (A) (A) (A) (A) (A) (A) (A) (A) (A)
                 (A) (A) (A) (A) (A) (A) (A) (A) (A) (A) (A) (A)
                 (A) (A) (A) (A) (A) (A) (A) (A) (A) (A) (A) (A)
                 (A) (A) (A) (A) (A) (A) (A) (A) (A) (A) (A) (A)
                 (A) (A) (A) (A) (A) (A) (A) (A) (A) (A) (A) (A)
                 (A) (A) (A) (A) (A) (A) (A) (A) (A) (A) (A) (A)
                 (A) (A) (A) (A) (A) (A) (A) (A) (A) (A) (A) (A)
                 (A) (A) (A) (A) (A) (A) (A) (A) (A) (A) (A) (A)
                 (A) (A) (A) (A) (A) (A) (A) (A) (A) (A) (A) (A)
                 (A) (A) (A) (A) (A) (A) (A) (A) (A) (A) (A) (A)
                 (A) (A) (A) (A) (A) (A) (A) (A) (A) (A) (A)
       Virtual   (A) (A) (A) (A) (A) (A) (A) (A) (A) (A) (A) (A)
                 (A) (A) (A) (A) (A) (A) (A) (A) (A) (A) (A) (A)
                 (A) (A) (A) (A) (A) (A) (A) (A) (A) (A) (A) (A)
                 (A) (A) (A) (A) (A) (A) (A) (A) (A) (A) (A) (A)
                 (A) (A) (A) (A) (A) (A) (A) (A) (A) (A) (A) (A)
                 (A) (A) (A) (A) (A) (A) (A) (A) (A) (A) (A) (A)
                 (A) (A) (A) (A) (A) (A) (A) (A) (A) (A) (A) (A)
                 (A) (A) (A) (A) (A) (A) (A) (A) (A) (A) (A) (A)
                 (A) (A) (A) (A) (A) (A) (A) (A) (A) (A) (A) (A)
                 (A) (A) (A) (A) (A) (A) (A) (A) (A) (A) (A) (A)
                 (A) (A) (A) (A) (A) (A) (A) (A) (A) (A) (A) (A)
                 (A) (A) (A) (A) (A) (A) (A) (A) (A) (A) (A) (A)
                 (A) (A) (A) (A) (A) (A) (A) (A) (A) (A) (A) (A)
                 (A) (A) (A) (A) (A) (A) (A) (A) (A) (A) (A) (A)
                 (A) (A) (A) (A) (A) (A) (A) (A) (A) (A) (A) (A)
                 (A) (A) (A) (A) (A) (A) (A) (A) (A) (A) (A) (A)
                 (A) (A) (A) (A) (A) (A) (A) (A) (A) (A) (A) (A)
                 (A) (A) (A) (A) (A) (A) (A) (A) (A) (A) (A) (A)
                 (A) (A) (A) (A) (A) (A) (A) (A) (A) (A) (A) (A)
                 (A) (A) (A) (A) (A) (A) (A) (A) (A) (A) (A) (A)
                 (A) (A) (A) (A) (A) (A) (A) (A) (A) (A) (A) (A)
                 (A) (A) (A) (A) (A) (A) (A) (A) (A) (A) (A) (A)
                 (A) (A) (A) (A) (A) (A) (A) (A) (A) (A) (A) (A)
                 (A) (A) (A) (A) (A) (A) (A) (A) (A) (A) (A) (A)
                 (A) (A) (A) (A) (A) (A) (A) (A) (A) (A) (A) (A)
                 (A) (A) (A) (A) (A) (A) (A) (A) (A) (A) (A) (A)
                 (A) (A) (A) (A) (A) (A) (A) (A) (A) (A) (A) (A)
                 (A) (A) (A) (A) (A) (A) (A) (A) (A) (A) (A) (A)
                 (A) (A) (A) (A) (A) (A) (A) (A) (A) (A) (A) (A)
                 (A) (A) (A) (A) (A) (A) (A) (A) (A) (A) (A) (A)
                 (A) (A) (A) (A) (A) (A) (A) (A) (A) (A) (A) (A)
                 (A) (A) (A) (A) (A) (A) (A) (A) (A) (A) (A) (A)
                 (A) (A) (A) (A) (A) (A) (A) (A) (A) (A) (A) (A)
                 (A) (A) (A) (A) (A) (A) (A) (A) (A) (A) (A) (A)
                 (A) (A) (A) (A) (A) (A) (A) (A) (A) (A) (A) (A)
                 (A) (A) (A) (A) (A) (A) (A) (A) (A) (A) (A) (A)
                 (A) (A) (A) (A) (A) (A) (A) (A) (A) (A) (A) (A)
                 (A) (A) (A) (A) (A) (A) (A) (A) (A) (A) (A) (A)
                 (A) (A) (A) (A) (A) (A) (A) (A) (A) (A) (A) (A)
                 (A) (A) (A) (A) (A) (A) (A) (A) (A) (A) (A) (A)
                 (A) (A) (A) (A) (A) (A) (A) (A) (A) (A) (A) (A)
                 (A) (A) (A) (A) (A) (A) (A) (A) (A) (A) (A) (A)
                 (A) (A) (A) (A) (A) (A) (A) (A) (A) (A) (A) (A)
                 (A) (A) (A) (A) (A) (A) (A) (A) (A) (A) (A) (A)
                 (A) (A) (A) (A) (A) (A) (A) (A) (A) (A) (A) (A)
                 (A) (A) (A) (A) (A) (A) (A)
 The electronic state of the initial guess is 1-A.
 Initial guess <Sx>= 0.0000 <Sy>= 0.0000 <Sz>= 0.0000 <S**2>= 0.0000 S= 0.0000
 Leave Link  401 at Thu Oct 13 22:36:15 2016, MaxMem= 1342177280 cpu:     109.1
 (Enter /opt/software/g09/linda-exe/l502.exel)
 UHF open shell SCF:
 Requested convergence on RMS density matrix=1.00D-08 within 128 cycles.
 Requested convergence on MAX density matrix=1.00D-06.
 Requested convergence on             energy=1.00D-06.
 No special actions if energy rises.
 Using DIIS extrapolation, IDIIS=  1040.
 Integral symmetry usage will be decided dynamically.
       579999 words used for storage of precomputed grid.
 IEnd=     2216885 IEndB=     2216885 NGot=  1342177280 MDV=  1340510666
 LenX=  1340510666 LenY=  1339977036
 Fock matrices will be formed incrementally for  20 cycles.

 Cycle   1  Pass 1  IDiag  1:
 FoFCou: FMM=T IPFlag=           0 FMFlag=      100000 FMFlg1=        2001
         NFxFlg=           0 DoJE=F BraDBF=F KetDBF=F FulRan=T
         Omega=  0.000000  0.000000  1.000000  0.000000  0.000000 ICntrl=       0 IOpCl=  1
         NMat0=    1 NMatS0=    1 NMatT0=    0 NMatD0=    1 NMtDS0=    0 NMtDT0=    0
         I1Cent=           0 NGrid=           0.
 Symmetry not used in FoFCou.
 FMM levels:  10  Number of levels for PrismC:   9
 E= -1898.70902597766    
 DIIS: error= 2.75D-02 at cycle   1 NSaved=   1.
 NSaved= 1 IEnMin= 1 EnMin= -1898.70902597766     IErMin= 1 ErrMin= 2.75D-02
 ErrMax= 2.75D-02 EMaxC= 1.00D-01 BMatC= 3.12D+00 BMatP= 3.12D+00
 IDIUse=3 WtCom= 7.25D-01 WtEn= 2.75D-01
 Coeff-Com:  0.100D+01
 Coeff-En:   0.100D+01
 Coeff:      0.100D+01
 Gap=     0.189 Goal=   None    Shift=    0.000
 Gap=     0.189 Goal=   None    Shift=    0.000
 GapD=    0.189 DampG=1.000 DampE=0.500 DampFc=0.5000 IDamp=-1.
 Damping current iteration by 5.00D-01
 RMSDP=2.99D-03 MaxDP=1.89D-01              OVMax= 2.25D-01

 Cycle   2  Pass 1  IDiag  1:
 RMSU=  1.05D-03    CP:  9.89D-01
 E= -1898.96379704090     Delta-E=       -0.254771063244 Rises=F Damp=T
 DIIS: error= 6.96D-03 at cycle   2 NSaved=   2.
 NSaved= 2 IEnMin= 2 EnMin= -1898.96379704090     IErMin= 2 ErrMin= 6.96D-03
 ErrMax= 6.96D-03 EMaxC= 1.00D-01 BMatC= 4.12D-01 BMatP= 3.12D+00
 IDIUse=3 WtCom= 9.30D-01 WtEn= 6.96D-02
 Coeff-Com:  0.181D+00 0.819D+00
 Coeff-En:   0.269D+00 0.731D+00
 Coeff:      0.187D+00 0.813D+00
 Gap=     0.159 Goal=   None    Shift=    0.000
 Gap=     0.159 Goal=   None    Shift=    0.000
 RMSDP=9.33D-04 MaxDP=6.36D-02 DE=-2.55D-01 OVMax= 1.67D-01

 Cycle   3  Pass 1  IDiag  1:
 RMSU=  6.30D-04    CP:  9.80D-01  8.29D-01
 E= -1899.36724740119     Delta-E=       -0.403450360292 Rises=F Damp=F
 DIIS: error= 8.65D-03 at cycle   3 NSaved=   3.
 NSaved= 3 IEnMin= 3 EnMin= -1899.36724740119     IErMin= 2 ErrMin= 6.96D-03
 ErrMax= 8.65D-03 EMaxC= 1.00D-01 BMatC= 4.35D-01 BMatP= 4.12D-01
 IDIUse=3 WtCom= 9.13D-01 WtEn= 8.65D-02
 Coeff-Com:  0.379D-01 0.502D+00 0.460D+00
 Coeff-En:   0.000D+00 0.000D+00 0.100D+01
 Coeff:      0.346D-01 0.458D+00 0.507D+00
 Gap=     0.162 Goal=   None    Shift=    0.000
 Gap=     0.162 Goal=   None    Shift=    0.000
 RMSDP=5.57D-04 MaxDP=5.28D-02 DE=-4.03D-01 OVMax= 5.74D-02

 Cycle   4  Pass 1  IDiag  1:
 RMSU=  2.29D-04    CP:  9.83D-01  9.22D-01  5.17D-01
 E= -1899.45135485641     Delta-E=       -0.084107455221 Rises=F Damp=F
 DIIS: error= 3.22D-03 at cycle   4 NSaved=   4.
 NSaved= 4 IEnMin= 4 EnMin= -1899.45135485641     IErMin= 4 ErrMin= 3.22D-03
 ErrMax= 3.22D-03 EMaxC= 1.00D-01 BMatC= 4.88D-02 BMatP= 4.12D-01
 IDIUse=3 WtCom= 9.68D-01 WtEn= 3.22D-02
 Coeff-Com:  0.536D-02 0.128D+00 0.280D+00 0.587D+00
 Coeff-En:   0.000D+00 0.000D+00 0.863D-01 0.914D+00
 Coeff:      0.519D-02 0.124D+00 0.274D+00 0.597D+00
 Gap=     0.158 Goal=   None    Shift=    0.000
 Gap=     0.158 Goal=   None    Shift=    0.000
 RMSDP=1.66D-04 MaxDP=1.46D-02 DE=-8.41D-02 OVMax= 1.80D-02

 Cycle   5  Pass 1  IDiag  1:
 RMSU=  6.75D-05    CP:  9.82D-01  8.90D-01  6.12D-01  7.12D-01
 E= -1899.46036420387     Delta-E=       -0.009009347459 Rises=F Damp=F
 DIIS: error= 8.50D-04 at cycle   5 NSaved=   5.
 NSaved= 5 IEnMin= 5 EnMin= -1899.46036420387     IErMin= 5 ErrMin= 8.50D-04
 ErrMax= 8.50D-04 EMaxC= 1.00D-01 BMatC= 4.17D-03 BMatP= 4.88D-02
 IDIUse=3 WtCom= 9.91D-01 WtEn= 8.50D-03
 Coeff-Com: -0.180D-03 0.213D-01 0.104D+00 0.338D+00 0.537D+00
 Coeff-En:   0.000D+00 0.000D+00 0.000D+00 0.263D-01 0.974D+00
 Coeff:     -0.179D-03 0.212D-01 0.103D+00 0.335D+00 0.540D+00
 Gap=     0.158 Goal=   None    Shift=    0.000
 Gap=     0.158 Goal=   None    Shift=    0.000
 RMSDP=5.50D-05 MaxDP=3.27D-03 DE=-9.01D-03 OVMax= 6.83D-03

 Cycle   6  Pass 1  IDiag  1:
 RMSU=  2.34D-05    CP:  9.82D-01  8.96D-01  6.13D-01  7.46D-01  5.65D-01
 E= -1899.46126045324     Delta-E=       -0.000896249368 Rises=F Damp=F
 DIIS: error= 2.43D-04 at cycle   6 NSaved=   6.
 NSaved= 6 IEnMin= 6 EnMin= -1899.46126045324     IErMin= 6 ErrMin= 2.43D-04
 ErrMax= 2.43D-04 EMaxC= 1.00D-01 BMatC= 3.60D-04 BMatP= 4.17D-03
 IDIUse=3 WtCom= 9.98D-01 WtEn= 2.43D-03
 Coeff-Com: -0.690D-03 0.212D-03 0.303D-01 0.124D+00 0.298D+00 0.548D+00
 Coeff-En:   0.000D+00 0.000D+00 0.000D+00 0.000D+00 0.222D-01 0.978D+00
 Coeff:     -0.688D-03 0.212D-03 0.302D-01 0.123D+00 0.297D+00 0.549D+00
 Gap=     0.158 Goal=   None    Shift=    0.000
 Gap=     0.158 Goal=   None    Shift=    0.000
 RMSDP=1.62D-05 MaxDP=1.02D-03 DE=-8.96D-04 OVMax= 2.56D-03

 Cycle   7  Pass 1  IDiag  1:
 RMSU=  6.97D-06    CP:  9.82D-01  8.96D-01  6.13D-01  7.53D-01  6.20D-01
                    CP:  6.56D-01
 E= -1899.46134158096     Delta-E=       -0.000081127724 Rises=F Damp=F
 DIIS: error= 7.46D-05 at cycle   7 NSaved=   7.
 NSaved= 7 IEnMin= 7 EnMin= -1899.46134158096     IErMin= 7 ErrMin= 7.46D-05
 ErrMax= 7.46D-05 EMaxC= 1.00D-01 BMatC= 3.55D-05 BMatP= 3.60D-04
 IDIUse=1 WtCom= 1.00D+00 WtEn= 0.00D+00
 Coeff-Com: -0.337D-03-0.150D-02 0.866D-02 0.416D-01 0.127D+00 0.314D+00
 Coeff-Com:  0.511D+00
 Coeff:     -0.337D-03-0.150D-02 0.866D-02 0.416D-01 0.127D+00 0.314D+00
 Coeff:      0.511D+00
 Gap=     0.158 Goal=   None    Shift=    0.000
 Gap=     0.158 Goal=   None    Shift=    0.000
 RMSDP=4.95D-06 MaxDP=4.68D-04 DE=-8.11D-05 OVMax= 6.88D-04

 Cycle   8  Pass 1  IDiag  1:
 RMSU=  1.96D-06    CP:  9.82D-01  8.96D-01  6.13D-01  7.53D-01  6.25D-01
                    CP:  6.92D-01  6.04D-01
 E= -1899.46134887121     Delta-E=       -0.000007290247 Rises=F Damp=F
 DIIS: error= 2.74D-05 at cycle   8 NSaved=   8.
 NSaved= 8 IEnMin= 8 EnMin= -1899.46134887121     IErMin= 8 ErrMin= 2.74D-05
 ErrMax= 2.74D-05 EMaxC= 1.00D-01 BMatC= 4.08D-06 BMatP= 3.55D-05
 IDIUse=1 WtCom= 1.00D+00 WtEn= 0.00D+00
 Coeff-Com: -0.135D-03-0.105D-02 0.240D-02 0.134D-01 0.508D-01 0.140D+00
 Coeff-Com:  0.309D+00 0.486D+00
 Coeff:     -0.135D-03-0.105D-02 0.240D-02 0.134D-01 0.508D-01 0.140D+00
 Coeff:      0.309D+00 0.486D+00
 Gap=     0.158 Goal=   None    Shift=    0.000
 Gap=     0.158 Goal=   None    Shift=    0.000
 RMSDP=1.45D-06 MaxDP=1.33D-04 DE=-7.29D-06 OVMax= 1.52D-04

 Cycle   9  Pass 1  IDiag  1:
 RMSU=  6.28D-07    CP:  9.82D-01  8.96D-01  6.13D-01  7.53D-01  6.25D-01
                    CP:  6.93D-01  6.48D-01  6.24D-01
 E= -1899.46134970727     Delta-E=       -0.000000836062 Rises=F Damp=F
 DIIS: error= 6.73D-06 at cycle   9 NSaved=   9.
 NSaved= 9 IEnMin= 9 EnMin= -1899.46134970727     IErMin= 9 ErrMin= 6.73D-06
 ErrMax= 6.73D-06 EMaxC= 1.00D-01 BMatC= 2.20D-07 BMatP= 4.08D-06
 IDIUse=1 WtCom= 1.00D+00 WtEn= 0.00D+00
 Coeff-Com: -0.848D-05-0.273D-03 0.134D-04 0.436D-03 0.672D-02 0.213D-01
 Coeff-Com:  0.696D-01 0.216D+00 0.687D+00
 Coeff:     -0.848D-05-0.273D-03 0.134D-04 0.436D-03 0.672D-02 0.213D-01
 Coeff:      0.696D-01 0.216D+00 0.687D+00
 Gap=     0.158 Goal=   None    Shift=    0.000
 Gap=     0.158 Goal=   None    Shift=    0.000
 RMSDP=4.25D-07 MaxDP=4.11D-05 DE=-8.36D-07 OVMax= 5.40D-05

 Cycle  10  Pass 1  IDiag  1:
 RMSU=  2.19D-07    CP:  9.82D-01  8.96D-01  6.14D-01  7.53D-01  6.26D-01
                    CP:  6.94D-01  6.55D-01  6.88D-01  7.89D-01
 E= -1899.46134974970     Delta-E=       -0.000000042431 Rises=F Damp=F
 DIIS: error= 2.57D-06 at cycle  10 NSaved=  10.
 NSaved=10 IEnMin=10 EnMin= -1899.46134974970     IErMin=10 ErrMin= 2.57D-06
 ErrMax= 2.57D-06 EMaxC= 1.00D-01 BMatC= 4.56D-08 BMatP= 2.20D-07
 IDIUse=1 WtCom= 1.00D+00 WtEn= 0.00D+00
 Coeff-Com:  0.452D-05-0.720D-04-0.153D-03-0.765D-03 0.130D-03 0.155D-02
 Coeff-Com:  0.162D-01 0.846D-01 0.403D+00 0.496D+00
 Coeff:      0.452D-05-0.720D-04-0.153D-03-0.765D-03 0.130D-03 0.155D-02
 Coeff:      0.162D-01 0.846D-01 0.403D+00 0.496D+00
 Gap=     0.158 Goal=   None    Shift=    0.000
 Gap=     0.158 Goal=   None    Shift=    0.000
 RMSDP=1.70D-07 MaxDP=1.55D-05 DE=-4.24D-08 OVMax= 1.98D-05

 Cycle  11  Pass 1  IDiag  1:
 RMSU=  7.50D-08    CP:  9.82D-01  8.96D-01  6.14D-01  7.53D-01  6.26D-01
                    CP:  6.94D-01  6.56D-01  6.91D-01  8.63D-01  6.42D-01
 E= -1899.46134975948     Delta-E=       -0.000000009780 Rises=F Damp=F
 DIIS: error= 6.86D-07 at cycle  11 NSaved=  11.
 NSaved=11 IEnMin=11 EnMin= -1899.46134975948     IErMin=11 ErrMin= 6.86D-07
 ErrMax= 6.86D-07 EMaxC= 1.00D-01 BMatC= 3.94D-09 BMatP= 4.56D-08
 IDIUse=1 WtCom= 1.00D+00 WtEn= 0.00D+00
 Coeff-Com:  0.286D-05 0.179D-05-0.921D-04-0.512D-03-0.985D-03-0.249D-02
 Coeff-Com: -0.210D-02 0.105D-01 0.111D+00 0.265D+00 0.619D+00
 Coeff:      0.286D-05 0.179D-05-0.921D-04-0.512D-03-0.985D-03-0.249D-02
 Coeff:     -0.210D-02 0.105D-01 0.111D+00 0.265D+00 0.619D+00
 Gap=     0.158 Goal=   None    Shift=    0.000
 Gap=     0.158 Goal=   None    Shift=    0.000
 RMSDP=5.48D-08 MaxDP=4.23D-06 DE=-9.78D-09 OVMax= 8.28D-06

 Cycle  12  Pass 1  IDiag  1:
 RMSU=  2.64D-08    CP:  9.82D-01  8.96D-01  6.14D-01  7.53D-01  6.26D-01
                    CP:  6.94D-01  6.57D-01  6.95D-01  8.75D-01  7.10D-01
                    CP:  7.35D-01
 E= -1899.46134976026     Delta-E=       -0.000000000773 Rises=F Damp=F
 DIIS: error= 2.46D-07 at cycle  12 NSaved=  12.
 NSaved=12 IEnMin=12 EnMin= -1899.46134976026     IErMin=12 ErrMin= 2.46D-07
 ErrMax= 2.46D-07 EMaxC= 1.00D-01 BMatC= 6.34D-10 BMatP= 3.94D-09
 IDIUse=1 WtCom= 1.00D+00 WtEn= 0.00D+00
 Coeff-Com:  0.918D-06 0.983D-05-0.351D-04-0.206D-03-0.556D-03-0.152D-02
 Coeff-Com: -0.274D-02-0.298D-02 0.211D-01 0.101D+00 0.360D+00 0.526D+00
 Coeff:      0.918D-06 0.983D-05-0.351D-04-0.206D-03-0.556D-03-0.152D-02
 Coeff:     -0.274D-02-0.298D-02 0.211D-01 0.101D+00 0.360D+00 0.526D+00
 Gap=     0.158 Goal=   None    Shift=    0.000
 Gap=     0.158 Goal=   None    Shift=    0.000
 RMSDP=2.18D-08 MaxDP=1.90D-06 DE=-7.73D-10 OVMax= 4.16D-06

 Cycle  13  Pass 1  IDiag  1:
 RMSU=  9.74D-09    CP:  9.82D-01  8.96D-01  6.14D-01  7.53D-01  6.26D-01
                    CP:  6.94D-01  6.56D-01  6.95D-01  8.78D-01  7.22D-01
                    CP:  7.91D-01  6.19D-01
 E= -1899.46134976042     Delta-E=       -0.000000000166 Rises=F Damp=F
 DIIS: error= 8.39D-08 at cycle  13 NSaved=  13.
 NSaved=13 IEnMin=13 EnMin= -1899.46134976042     IErMin=13 ErrMin= 8.39D-08
 ErrMax= 8.39D-08 EMaxC= 1.00D-01 BMatC= 5.17D-11 BMatP= 6.34D-10
 IDIUse=1 WtCom= 1.00D+00 WtEn= 0.00D+00
 Coeff-Com: -0.232D-07 0.473D-05-0.694D-05-0.409D-04-0.165D-03-0.457D-03
 Coeff-Com: -0.111D-02-0.298D-02-0.324D-02 0.170D-01 0.100D+00 0.269D+00
 Coeff-Com:  0.622D+00
 Coeff:     -0.232D-07 0.473D-05-0.694D-05-0.409D-04-0.165D-03-0.457D-03
 Coeff:     -0.111D-02-0.298D-02-0.324D-02 0.170D-01 0.100D+00 0.269D+00
 Coeff:      0.622D+00
 Gap=     0.158 Goal=   None    Shift=    0.000
 Gap=     0.158 Goal=   None    Shift=    0.000
 RMSDP=6.66D-09 MaxDP=5.27D-07 DE=-1.66D-10 OVMax= 1.29D-06

 Error on total polarization charges =  0.01279
 SCF Done:  E(UB3LYP) =  -1899.46134976     A.U. after   13 cycles
             Convg  =    0.6660D-08             -V/T =  2.0064
 <Sx>= 0.0000 <Sy>= 0.0000 <Sz>= 0.0000 <S**2>= 0.0000 S= 0.0000
 <L.S>= 0.000000000000E+00
 KE= 1.887312170697D+03 PE=-1.287359287214D+04 EE= 4.867023533615D+03
 Annihilation of the first spin contaminant:
 S**2 before annihilation     0.0000,   after     0.0000
 Leave Link  502 at Thu Oct 13 22:43:18 2016, MaxMem= 1342177280 cpu:    7971.4
 (Enter /opt/software/g09/l601.exe)
 Copying SCF densities to generalized density rwf, IOpCl= 1 IROHF=0.

 **********************************************************************

            Population analysis using the SCF density.

 **********************************************************************

 Orbital symmetries:
 Alpha Orbitals:
       Occupied  (A) (A) (A) (A) (A) (A) (A) (A) (A) (A) (A) (A)
                 (A) (A) (A) (A) (A) (A) (A) (A) (A) (A) (A) (A)
                 (A) (A) (A) (A) (A) (A) (A) (A) (A) (A) (A) (A)
                 (A) (A) (A) (A) (A) (A) (A) (A) (A) (A) (A) (A)
                 (A) (A) (A) (A) (A) (A) (A) (A) (A) (A) (A) (A)
                 (A) (A) (A) (A) (A) (A) (A) (A) (A) (A) (A) (A)
                 (A) (A) (A) (A) (A) (A) (A) (A) (A) (A) (A) (A)
                 (A) (A) (A) (A) (A) (A) (A) (A) (A) (A) (A) (A)
                 (A) (A) (A) (A) (A) (A) (A) (A) (A) (A) (A) (A)
                 (A) (A) (A) (A) (A) (A) (A) (A) (A) (A) (A) (A)
                 (A) (A) (A) (A) (A) (A) (A) (A) (A) (A) (A) (A)
                 (A) (A) (A) (A) (A) (A) (A) (A) (A) (A) (A)
       Virtual   (A) (A) (A) (A) (A) (A) (A) (A) (A) (A) (A) (A)
                 (A) (A) (A) (A) (A) (A) (A) (A) (A) (A) (A) (A)
                 (A) (A) (A) (A) (A) (A) (A) (A) (A) (A) (A) (A)
                 (A) (A) (A) (A) (A) (A) (A) (A) (A) (A) (A) (A)
                 (A) (A) (A) (A) (A) (A) (A) (A) (A) (A) (A) (A)
                 (A) (A) (A) (A) (A) (A) (A) (A) (A) (A) (A) (A)
                 (A) (A) (A) (A) (A) (A) (A) (A) (A) (A) (A) (A)
                 (A) (A) (A) (A) (A) (A) (A) (A) (A) (A) (A) (A)
                 (A) (A) (A) (A) (A) (A) (A) (A) (A) (A) (A) (A)
                 (A) (A) (A) (A) (A) (A) (A) (A) (A) (A) (A) (A)
                 (A) (A) (A) (A) (A) (A) (A) (A) (A) (A) (A) (A)
                 (A) (A) (A) (A) (A) (A) (A) (A) (A) (A) (A) (A)
                 (A) (A) (A) (A) (A) (A) (A) (A) (A) (A) (A) (A)
                 (A) (A) (A) (A) (A) (A) (A) (A) (A) (A) (A) (A)
                 (A) (A) (A) (A) (A) (A) (A) (A) (A) (A) (A) (A)
                 (A) (A) (A) (A) (A) (A) (A) (A) (A) (A) (A) (A)
                 (A) (A) (A) (A) (A) (A) (A) (A) (A) (A) (A) (A)
                 (A) (A) (A) (A) (A) (A) (A) (A) (A) (A) (A) (A)
                 (A) (A) (A) (A) (A) (A) (A) (A) (A) (A) (A) (A)
                 (A) (A) (A) (A) (A) (A) (A) (A) (A) (A) (A) (A)
                 (A) (A) (A) (A) (A) (A) (A) (A) (A) (A) (A) (A)
                 (A) (A) (A) (A) (A) (A) (A) (A) (A) (A) (A) (A)
                 (A) (A) (A) (A) (A) (A) (A) (A) (A) (A) (A) (A)
                 (A) (A) (A) (A) (A) (A) (A) (A) (A) (A) (A) (A)
                 (A) (A) (A) (A) (A) (A) (A) (A) (A) (A) (A) (A)
                 (A) (A) (A) (A) (A) (A) (A) (A) (A) (A) (A) (A)
                 (A) (A) (A) (A) (A) (A) (A) (A) (A) (A) (A) (A)
                 (A) (A) (A) (A) (A) (A) (A) (A) (A) (A) (A) (A)
                 (A) (A) (A) (A) (A) (A) (A) (A) (A) (A) (A) (A)
                 (A) (A) (A) (A) (A) (A) (A) (A) (A) (A) (A) (A)
                 (A) (A) (A) (A) (A) (A) (A) (A) (A) (A) (A) (A)
                 (A) (A) (A) (A) (A) (A) (A) (A) (A) (A) (A) (A)
                 (A) (A) (A) (A) (A) (A) (A) (A) (A) (A) (A) (A)
                 (A) (A) (A) (A) (A) (A) (A) (A) (A) (A) (A) (A)
                 (A) (A) (A) (A) (A) (A) (A) (A) (A) (A) (A) (A)
                 (A) (A) (A) (A) (A) (A) (A) (A) (A) (A) (A) (A)
                 (A) (A) (A) (A) (A) (A) (A) (A) (A) (A) (A) (A)
                 (A) (A) (A) (A) (A) (A) (A) (A) (A) (A) (A) (A)
                 (A) (A) (A) (A) (A) (A) (A) (A) (A) (A) (A) (A)
                 (A) (A) (A) (A) (A) (A) (A) (A) (A) (A) (A) (A)
                 (A) (A) (A) (A) (A) (A) (A) (A) (A) (A) (A) (A)
                 (A) (A) (A) (A) (A) (A) (A) (A) (A) (A) (A) (A)
                 (A) (A) (A) (A) (A) (A) (A) (A) (A) (A) (A) (A)
                 (A) (A) (A) (A) (A) (A) (A) (A) (A) (A) (A) (A)
                 (A) (A) (A) (A) (A) (A) (A) (A) (A) (A) (A) (A)
                 (A) (A) (A) (A) (A) (A) (A)
 Beta  Orbitals:
       Occupied  (A) (A) (A) (A) (A) (A) (A) (A) (A) (A) (A) (A)
                 (A) (A) (A) (A) (A) (A) (A) (A) (A) (A) (A) (A)
                 (A) (A) (A) (A) (A) (A) (A) (A) (A) (A) (A) (A)
                 (A) (A) (A) (A) (A) (A) (A) (A) (A) (A) (A) (A)
                 (A) (A) (A) (A) (A) (A) (A) (A) (A) (A) (A) (A)
                 (A) (A) (A) (A) (A) (A) (A) (A) (A) (A) (A) (A)
                 (A) (A) (A) (A) (A) (A) (A) (A) (A) (A) (A) (A)
                 (A) (A) (A) (A) (A) (A) (A) (A) (A) (A) (A) (A)
                 (A) (A) (A) (A) (A) (A) (A) (A) (A) (A) (A) (A)
                 (A) (A) (A) (A) (A) (A) (A) (A) (A) (A) (A) (A)
                 (A) (A) (A) (A) (A) (A) (A) (A) (A) (A) (A) (A)
                 (A) (A) (A) (A) (A) (A) (A) (A) (A) (A) (A)
       Virtual   (A) (A) (A) (A) (A) (A) (A) (A) (A) (A) (A) (A)
                 (A) (A) (A) (A) (A) (A) (A) (A) (A) (A) (A) (A)
                 (A) (A) (A) (A) (A) (A) (A) (A) (A) (A) (A) (A)
                 (A) (A) (A) (A) (A) (A) (A) (A) (A) (A) (A) (A)
                 (A) (A) (A) (A) (A) (A) (A) (A) (A) (A) (A) (A)
                 (A) (A) (A) (A) (A) (A) (A) (A) (A) (A) (A) (A)
                 (A) (A) (A) (A) (A) (A) (A) (A) (A) (A) (A) (A)
                 (A) (A) (A) (A) (A) (A) (A) (A) (A) (A) (A) (A)
                 (A) (A) (A) (A) (A) (A) (A) (A) (A) (A) (A) (A)
                 (A) (A) (A) (A) (A) (A) (A) (A) (A) (A) (A) (A)
                 (A) (A) (A) (A) (A) (A) (A) (A) (A) (A) (A) (A)
                 (A) (A) (A) (A) (A) (A) (A) (A) (A) (A) (A) (A)
                 (A) (A) (A) (A) (A) (A) (A) (A) (A) (A) (A) (A)
                 (A) (A) (A) (A) (A) (A) (A) (A) (A) (A) (A) (A)
                 (A) (A) (A) (A) (A) (A) (A) (A) (A) (A) (A) (A)
                 (A) (A) (A) (A) (A) (A) (A) (A) (A) (A) (A) (A)
                 (A) (A) (A) (A) (A) (A) (A) (A) (A) (A) (A) (A)
                 (A) (A) (A) (A) (A) (A) (A) (A) (A) (A) (A) (A)
                 (A) (A) (A) (A) (A) (A) (A) (A) (A) (A) (A) (A)
                 (A) (A) (A) (A) (A) (A) (A) (A) (A) (A) (A) (A)
                 (A) (A) (A) (A) (A) (A) (A) (A) (A) (A) (A) (A)
                 (A) (A) (A) (A) (A) (A) (A) (A) (A) (A) (A) (A)
                 (A) (A) (A) (A) (A) (A) (A) (A) (A) (A) (A) (A)
                 (A) (A) (A) (A) (A) (A) (A) (A) (A) (A) (A) (A)
                 (A) (A) (A) (A) (A) (A) (A) (A) (A) (A) (A) (A)
                 (A) (A) (A) (A) (A) (A) (A) (A) (A) (A) (A) (A)
                 (A) (A) (A) (A) (A) (A) (A) (A) (A) (A) (A) (A)
                 (A) (A) (A) (A) (A) (A) (A) (A) (A) (A) (A) (A)
                 (A) (A) (A) (A) (A) (A) (A) (A) (A) (A) (A) (A)
                 (A) (A) (A) (A) (A) (A) (A) (A) (A) (A) (A) (A)
                 (A) (A) (A) (A) (A) (A) (A) (A) (A) (A) (A) (A)
                 (A) (A) (A) (A) (A) (A) (A) (A) (A) (A) (A) (A)
                 (A) (A) (A) (A) (A) (A) (A) (A) (A) (A) (A) (A)
                 (A) (A) (A) (A) (A) (A) (A) (A) (A) (A) (A) (A)
                 (A) (A) (A) (A) (A) (A) (A) (A) (A) (A) (A) (A)
                 (A) (A) (A) (A) (A) (A) (A) (A) (A) (A) (A) (A)
                 (A) (A) (A) (A) (A) (A) (A) (A) (A) (A) (A) (A)
                 (A) (A) (A) (A) (A) (A) (A) (A) (A) (A) (A) (A)
                 (A) (A) (A) (A) (A) (A) (A) (A) (A) (A) (A) (A)
                 (A) (A) (A) (A) (A) (A) (A) (A) (A) (A) (A) (A)
                 (A) (A) (A) (A) (A) (A) (A) (A) (A) (A) (A) (A)
                 (A) (A) (A) (A) (A) (A) (A) (A) (A) (A) (A) (A)
                 (A) (A) (A) (A) (A) (A) (A) (A) (A) (A) (A) (A)
                 (A) (A) (A) (A) (A) (A) (A) (A) (A) (A) (A) (A)
                 (A) (A) (A) (A) (A) (A) (A) (A) (A) (A) (A) (A)
                 (A) (A) (A) (A) (A) (A) (A)
 The electronic state is 1-A.
 Alpha  occ. eigenvalues --  -19.18395 -19.17441 -19.16601 -19.16192 -19.15398
 Alpha  occ. eigenvalues --  -19.14386 -19.13090 -14.41473 -14.40082 -14.38977
 Alpha  occ. eigenvalues --  -14.38058 -14.37442 -14.37089 -10.32022 -10.31512
 Alpha  occ. eigenvalues --  -10.30383 -10.28134 -10.26269 -10.26186 -10.25588
 Alpha  occ. eigenvalues --  -10.24082 -10.23890 -10.22628 -10.21117 -10.20874
 Alpha  occ. eigenvalues --  -10.20821 -10.20541 -10.19823 -10.19775 -10.19755
 Alpha  occ. eigenvalues --  -10.19667 -10.19655 -10.19648 -10.19509 -10.19407
 Alpha  occ. eigenvalues --  -10.19195 -10.18825 -10.18686 -10.18448 -10.18404
 Alpha  occ. eigenvalues --   -1.10263  -1.08233  -1.07127  -1.06150  -1.05879
 Alpha  occ. eigenvalues --   -1.04098  -1.03924  -1.02192  -1.01772  -1.00363
 Alpha  occ. eigenvalues --   -0.89907  -0.87590  -0.87377  -0.85400  -0.85133
 Alpha  occ. eigenvalues --   -0.84967  -0.81213  -0.77328  -0.76991  -0.76723
 Alpha  occ. eigenvalues --   -0.74860  -0.74705  -0.74576  -0.74127  -0.69674
 Alpha  occ. eigenvalues --   -0.67635  -0.66649  -0.64842  -0.63586  -0.62840
 Alpha  occ. eigenvalues --   -0.61603  -0.61171  -0.60928  -0.59840  -0.59238
 Alpha  occ. eigenvalues --   -0.59209  -0.57397  -0.55576  -0.55204  -0.54214
 Alpha  occ. eigenvalues --   -0.53746  -0.53542  -0.53207  -0.52603  -0.51135
 Alpha  occ. eigenvalues --   -0.50213  -0.49937  -0.49352  -0.49090  -0.48329
 Alpha  occ. eigenvalues --   -0.47761  -0.46915  -0.46502  -0.46136  -0.45906
 Alpha  occ. eigenvalues --   -0.44882  -0.44839  -0.44608  -0.44460  -0.44255
 Alpha  occ. eigenvalues --   -0.43616  -0.43081  -0.42824  -0.42775  -0.42483
 Alpha  occ. eigenvalues --   -0.42153  -0.41846  -0.41279  -0.40756  -0.39994
 Alpha  occ. eigenvalues --   -0.39662  -0.39525  -0.39457  -0.37879  -0.37456
 Alpha  occ. eigenvalues --   -0.37061  -0.36905  -0.36557  -0.36336  -0.36184
 Alpha  occ. eigenvalues --   -0.35629  -0.35455  -0.35364  -0.34618  -0.34403
 Alpha  occ. eigenvalues --   -0.33921  -0.33601  -0.32307  -0.31092  -0.30644
 Alpha  occ. eigenvalues --   -0.29598  -0.29505  -0.29338  -0.28841  -0.27912
 Alpha  occ. eigenvalues --   -0.26265  -0.25190  -0.24529  -0.24473  -0.23522
 Alpha  occ. eigenvalues --   -0.22450  -0.22384  -0.22345
 Alpha virt. eigenvalues --   -0.06504  -0.05823  -0.05644  -0.01550  -0.00397
 Alpha virt. eigenvalues --   -0.00120   0.00209   0.00471   0.01671   0.04321
 Alpha virt. eigenvalues --    0.04765   0.05270   0.07954   0.08471   0.08585
 Alpha virt. eigenvalues --    0.08918   0.09291   0.09806   0.10004   0.10163
 Alpha virt. eigenvalues --    0.11321   0.12163   0.13107   0.13914   0.14115
 Alpha virt. eigenvalues --    0.14445   0.15149   0.15679   0.16085   0.16228
 Alpha virt. eigenvalues --    0.16488   0.16546   0.16786   0.17135   0.17249
 Alpha virt. eigenvalues --    0.17536   0.17726   0.18101   0.18429   0.18745
 Alpha virt. eigenvalues --    0.18959   0.19824   0.21242   0.21383   0.21763
 Alpha virt. eigenvalues --    0.22278   0.22896   0.24114   0.24296   0.24541
 Alpha virt. eigenvalues --    0.25455   0.26300   0.26540   0.26668   0.27054
 Alpha virt. eigenvalues --    0.28711   0.29509   0.29870   0.30680   0.31475
 Alpha virt. eigenvalues --    0.32565   0.32831   0.33161   0.33361   0.33875
 Alpha virt. eigenvalues --    0.34063   0.34401   0.35050   0.36257   0.37708
 Alpha virt. eigenvalues --    0.38836   0.39337   0.40273   0.40730   0.41345
 Alpha virt. eigenvalues --    0.41573   0.42287   0.47630   0.48970   0.49134
 Alpha virt. eigenvalues --    0.49682   0.50049   0.50188   0.50254   0.50397
 Alpha virt. eigenvalues --    0.51117   0.51706   0.51931   0.52837   0.52983
 Alpha virt. eigenvalues --    0.53730   0.53970   0.54674   0.54917   0.55288
 Alpha virt. eigenvalues --    0.55511   0.55675   0.55702   0.56417   0.56769
 Alpha virt. eigenvalues --    0.57178   0.57546   0.58050   0.58257   0.58318
 Alpha virt. eigenvalues --    0.58663   0.58824   0.58899   0.58965   0.59506
 Alpha virt. eigenvalues --    0.59834   0.60034   0.60158   0.60653   0.60774
 Alpha virt. eigenvalues --    0.60896   0.61217   0.61302   0.61450   0.61548
 Alpha virt. eigenvalues --    0.61680   0.61868   0.62029   0.62336   0.62560
 Alpha virt. eigenvalues --    0.62643   0.63418   0.64491   0.64651   0.64709
 Alpha virt. eigenvalues --    0.64783   0.65309   0.65551   0.65813   0.66770
 Alpha virt. eigenvalues --    0.67220   0.68260   0.68791   0.70111   0.70752
 Alpha virt. eigenvalues --    0.71197   0.72660   0.72932   0.73307   0.74472
 Alpha virt. eigenvalues --    0.75070   0.75421   0.76570   0.77132   0.77394
 Alpha virt. eigenvalues --    0.77667   0.77829   0.78026   0.79010   0.79461
 Alpha virt. eigenvalues --    0.79724   0.80180   0.80889   0.81243   0.81413
 Alpha virt. eigenvalues --    0.81703   0.81988   0.82152   0.82539   0.82592
 Alpha virt. eigenvalues --    0.82961   0.83127   0.83497   0.83892   0.84050
 Alpha virt. eigenvalues --    0.84947   0.85287   0.85416   0.85965   0.86143
 Alpha virt. eigenvalues --    0.86786   0.87546   0.88436   0.88614   0.88967
 Alpha virt. eigenvalues --    0.89075   0.89721   0.90478   0.91102   0.91795
 Alpha virt. eigenvalues --    0.92990   0.93657   0.94145   0.94780   0.95221
 Alpha virt. eigenvalues --    0.96108   0.96560   0.97279   0.97489   0.98242
 Alpha virt. eigenvalues --    0.98922   0.99665   1.00238   1.01122   1.01570
 Alpha virt. eigenvalues --    1.01807   1.02853   1.03298   1.04216   1.05028
 Alpha virt. eigenvalues --    1.05456   1.05930   1.06547   1.07341   1.07481
 Alpha virt. eigenvalues --    1.07984   1.08774   1.09442   1.09630   1.10263
 Alpha virt. eigenvalues --    1.10558   1.10995   1.11148   1.12286   1.12979
 Alpha virt. eigenvalues --    1.13515   1.15274   1.16997   1.17408   1.18089
 Alpha virt. eigenvalues --    1.19981   1.20061   1.21655   1.21833   1.23169
 Alpha virt. eigenvalues --    1.23175   1.23352   1.23821   1.23854   1.24546
 Alpha virt. eigenvalues --    1.25522   1.25614   1.26555   1.27088   1.27277
 Alpha virt. eigenvalues --    1.28106   1.28445   1.28659   1.29830   1.30454
 Alpha virt. eigenvalues --    1.31247   1.32631   1.32856   1.34006   1.34155
 Alpha virt. eigenvalues --    1.34359   1.34486   1.35046   1.36589   1.36838
 Alpha virt. eigenvalues --    1.36911   1.37355   1.37619   1.38228   1.38923
 Alpha virt. eigenvalues --    1.40066   1.40112   1.40258   1.40432   1.40515
 Alpha virt. eigenvalues --    1.40928   1.40995   1.41198   1.41587   1.42219
 Alpha virt. eigenvalues --    1.42386   1.43188   1.44268   1.44996   1.46499
 Alpha virt. eigenvalues --    1.46874   1.47655   1.49223   1.50846   1.53381
 Alpha virt. eigenvalues --    1.54197   1.54956   1.55882   1.57292   1.58677
 Alpha virt. eigenvalues --    1.59472   1.59966   1.60281   1.60962   1.61102
 Alpha virt. eigenvalues --    1.62153   1.63469   1.65960   1.67158   1.68753
 Alpha virt. eigenvalues --    1.69812   1.71256   1.71637   1.72863   1.73253
 Alpha virt. eigenvalues --    1.74100   1.74636   1.74799   1.75422   1.76727
 Alpha virt. eigenvalues --    1.76918   1.77140   1.77941   1.78128   1.78410
 Alpha virt. eigenvalues --    1.78767   1.79053   1.79448   1.79706   1.80249
 Alpha virt. eigenvalues --    1.80753   1.81096   1.81423   1.82112   1.83244
 Alpha virt. eigenvalues --    1.83780   1.84939   1.85490   1.85944   1.86248
 Alpha virt. eigenvalues --    1.86458   1.87301   1.88010   1.88516   1.89355
 Alpha virt. eigenvalues --    1.89525   1.90090   1.90516   1.90966   1.91086
 Alpha virt. eigenvalues --    1.91836   1.91999   1.92539   1.92747   1.93079
 Alpha virt. eigenvalues --    1.93609   1.93837   1.94301   1.94541   1.95782
 Alpha virt. eigenvalues --    1.97463   1.97781   1.98166   1.98905   1.99139
 Alpha virt. eigenvalues --    1.99267   1.99362   1.99961   2.00157   2.01157
 Alpha virt. eigenvalues --    2.01877   2.03242   2.03484   2.04284   2.04356
 Alpha virt. eigenvalues --    2.05005   2.05248   2.05399   2.07056   2.08080
 Alpha virt. eigenvalues --    2.08586   2.09622   2.10861   2.10876   2.12831
 Alpha virt. eigenvalues --    2.13281   2.13657   2.14953   2.17203   2.17585
 Alpha virt. eigenvalues --    2.18043   2.18909   2.19019   2.19870   2.21264
 Alpha virt. eigenvalues --    2.23815   2.23945   2.24313   2.24911   2.26085
 Alpha virt. eigenvalues --    2.26322   2.27038   2.27257   2.28337   2.28453
 Alpha virt. eigenvalues --    2.28644   2.28911   2.29493   2.30002   2.31498
 Alpha virt. eigenvalues --    2.31808   2.32776   2.33001   2.33284   2.33800
 Alpha virt. eigenvalues --    2.34834   2.35891   2.36750   2.36980   2.37204
 Alpha virt. eigenvalues --    2.37969   2.38392   2.38423   2.38861   2.39351
 Alpha virt. eigenvalues --    2.40712   2.40787   2.40926   2.41425   2.42050
 Alpha virt. eigenvalues --    2.42717   2.43488   2.43892   2.44155   2.44638
 Alpha virt. eigenvalues --    2.45129   2.45530   2.45827   2.46441   2.46946
 Alpha virt. eigenvalues --    2.47342   2.47625   2.48022   2.48559   2.49343
 Alpha virt. eigenvalues --    2.49858   2.50700   2.51582   2.51990   2.52458
 Alpha virt. eigenvalues --    2.53795   2.54023   2.55229   2.55376   2.55743
 Alpha virt. eigenvalues --    2.56271   2.57001   2.57299   2.57513   2.57935
 Alpha virt. eigenvalues --    2.58215   2.58318   2.58730   2.59328   2.60009
 Alpha virt. eigenvalues --    2.60212   2.60531   2.61400   2.61791   2.62817
 Alpha virt. eigenvalues --    2.63237   2.64230   2.65102   2.65595   2.66311
 Alpha virt. eigenvalues --    2.67274   2.67798   2.68737   2.69701   2.70592
 Alpha virt. eigenvalues --    2.70955   2.72049   2.72096   2.72499   2.73530
 Alpha virt. eigenvalues --    2.73729   2.73925   2.74109   2.74198   2.74721
 Alpha virt. eigenvalues --    2.74757   2.75909   2.77541   2.78060   2.78689
 Alpha virt. eigenvalues --    2.79532   2.81357   2.81556   2.83750   2.85586
 Alpha virt. eigenvalues --    2.86989   2.87212   2.87991   2.88260   2.89009
 Alpha virt. eigenvalues --    2.91098   2.91983   2.94277   2.96096   2.97120
 Alpha virt. eigenvalues --    2.98638   2.98852   2.99685   3.01078   3.02418
 Alpha virt. eigenvalues --    3.03346   3.05829   3.06341   3.07487   3.07906
 Alpha virt. eigenvalues --    3.10629   3.11419   3.12612   3.13950   3.16222
 Alpha virt. eigenvalues --    3.17074   3.18502   3.18592   3.18897   3.19412
 Alpha virt. eigenvalues --    3.20159   3.22460   3.23666   3.23787   3.23908
 Alpha virt. eigenvalues --    3.24657   3.30411   3.30853   3.32158   3.32779
 Alpha virt. eigenvalues --    3.36230   3.37352   3.38105   3.40960   3.46533
 Alpha virt. eigenvalues --    3.47314   3.47728   3.47941   3.48222   3.49595
 Alpha virt. eigenvalues --    3.50658   3.51130   3.53701   3.56005   3.57113
 Alpha virt. eigenvalues --    3.57773   3.58380   3.60377   3.63039   3.87986
 Alpha virt. eigenvalues --    3.88081   3.88741
  Beta  occ. eigenvalues --  -19.18395 -19.17441 -19.16601 -19.16192 -19.15398
  Beta  occ. eigenvalues --  -19.14386 -19.13090 -14.41473 -14.40082 -14.38977
  Beta  occ. eigenvalues --  -14.38058 -14.37442 -14.37089 -10.32022 -10.31512
  Beta  occ. eigenvalues --  -10.30383 -10.28134 -10.26269 -10.26186 -10.25588
  Beta  occ. eigenvalues --  -10.24082 -10.23890 -10.22628 -10.21117 -10.20874
  Beta  occ. eigenvalues --  -10.20821 -10.20541 -10.19823 -10.19775 -10.19755
  Beta  occ. eigenvalues --  -10.19667 -10.19655 -10.19648 -10.19509 -10.19407
  Beta  occ. eigenvalues --  -10.19195 -10.18825 -10.18686 -10.18448 -10.18404
  Beta  occ. eigenvalues --   -1.10263  -1.08233  -1.07127  -1.06150  -1.05879
  Beta  occ. eigenvalues --   -1.04098  -1.03924  -1.02192  -1.01772  -1.00363
  Beta  occ. eigenvalues --   -0.89907  -0.87590  -0.87377  -0.85400  -0.85133
  Beta  occ. eigenvalues --   -0.84967  -0.81213  -0.77328  -0.76991  -0.76723
  Beta  occ. eigenvalues --   -0.74860  -0.74705  -0.74576  -0.74127  -0.69674
  Beta  occ. eigenvalues --   -0.67635  -0.66649  -0.64842  -0.63586  -0.62840
  Beta  occ. eigenvalues --   -0.61603  -0.61171  -0.60928  -0.59840  -0.59238
  Beta  occ. eigenvalues --   -0.59209  -0.57397  -0.55576  -0.55204  -0.54214
  Beta  occ. eigenvalues --   -0.53746  -0.53542  -0.53207  -0.52603  -0.51135
  Beta  occ. eigenvalues --   -0.50213  -0.49937  -0.49352  -0.49090  -0.48329
  Beta  occ. eigenvalues --   -0.47761  -0.46915  -0.46502  -0.46136  -0.45906
  Beta  occ. eigenvalues --   -0.44882  -0.44839  -0.44608  -0.44460  -0.44255
  Beta  occ. eigenvalues --   -0.43616  -0.43081  -0.42824  -0.42775  -0.42483
  Beta  occ. eigenvalues --   -0.42153  -0.41846  -0.41279  -0.40756  -0.39994
  Beta  occ. eigenvalues --   -0.39662  -0.39525  -0.39457  -0.37879  -0.37456
  Beta  occ. eigenvalues --   -0.37061  -0.36905  -0.36557  -0.36336  -0.36184
  Beta  occ. eigenvalues --   -0.35629  -0.35455  -0.35364  -0.34618  -0.34403
  Beta  occ. eigenvalues --   -0.33921  -0.33601  -0.32307  -0.31092  -0.30644
  Beta  occ. eigenvalues --   -0.29598  -0.29505  -0.29338  -0.28841  -0.27912
  Beta  occ. eigenvalues --   -0.26265  -0.25190  -0.24529  -0.24473  -0.23522
  Beta  occ. eigenvalues --   -0.22450  -0.22384  -0.22345
  Beta virt. eigenvalues --   -0.06504  -0.05823  -0.05644  -0.01550  -0.00397
  Beta virt. eigenvalues --   -0.00120   0.00209   0.00471   0.01671   0.04321
  Beta virt. eigenvalues --    0.04765   0.05270   0.07954   0.08471   0.08585
  Beta virt. eigenvalues --    0.08918   0.09291   0.09806   0.10004   0.10163
  Beta virt. eigenvalues --    0.11321   0.12163   0.13107   0.13914   0.14115
  Beta virt. eigenvalues --    0.14445   0.15149   0.15679   0.16085   0.16228
  Beta virt. eigenvalues --    0.16488   0.16546   0.16786   0.17135   0.17249
  Beta virt. eigenvalues --    0.17536   0.17726   0.18101   0.18429   0.18745
  Beta virt. eigenvalues --    0.18959   0.19824   0.21242   0.21383   0.21763
  Beta virt. eigenvalues --    0.22278   0.22896   0.24114   0.24296   0.24541
  Beta virt. eigenvalues --    0.25455   0.26300   0.26540   0.26668   0.27054
  Beta virt. eigenvalues --    0.28711   0.29509   0.29870   0.30680   0.31475
  Beta virt. eigenvalues --    0.32565   0.32831   0.33161   0.33361   0.33875
  Beta virt. eigenvalues --    0.34063   0.34401   0.35050   0.36257   0.37708
  Beta virt. eigenvalues --    0.38836   0.39337   0.40273   0.40730   0.41345
  Beta virt. eigenvalues --    0.41573   0.42287   0.47630   0.48970   0.49134
  Beta virt. eigenvalues --    0.49682   0.50049   0.50188   0.50254   0.50397
  Beta virt. eigenvalues --    0.51117   0.51706   0.51931   0.52837   0.52983
  Beta virt. eigenvalues --    0.53730   0.53970   0.54674   0.54917   0.55288
  Beta virt. eigenvalues --    0.55511   0.55675   0.55702   0.56417   0.56769
  Beta virt. eigenvalues --    0.57178   0.57546   0.58050   0.58257   0.58318
  Beta virt. eigenvalues --    0.58663   0.58824   0.58899   0.58965   0.59506
  Beta virt. eigenvalues --    0.59834   0.60034   0.60158   0.60653   0.60774
  Beta virt. eigenvalues --    0.60896   0.61217   0.61302   0.61450   0.61548
  Beta virt. eigenvalues --    0.61680   0.61868   0.62029   0.62336   0.62560
  Beta virt. eigenvalues --    0.62643   0.63418   0.64491   0.64651   0.64709
  Beta virt. eigenvalues --    0.64783   0.65309   0.65551   0.65813   0.66770
  Beta virt. eigenvalues --    0.67220   0.68260   0.68791   0.70111   0.70752
  Beta virt. eigenvalues --    0.71197   0.72660   0.72932   0.73307   0.74472
  Beta virt. eigenvalues --    0.75070   0.75421   0.76570   0.77132   0.77394
  Beta virt. eigenvalues --    0.77667   0.77829   0.78026   0.79010   0.79461
  Beta virt. eigenvalues --    0.79724   0.80180   0.80889   0.81243   0.81413
  Beta virt. eigenvalues --    0.81703   0.81988   0.82152   0.82539   0.82592
  Beta virt. eigenvalues --    0.82961   0.83127   0.83497   0.83892   0.84050
  Beta virt. eigenvalues --    0.84947   0.85287   0.85416   0.85965   0.86143
  Beta virt. eigenvalues --    0.86786   0.87546   0.88436   0.88614   0.88967
  Beta virt. eigenvalues --    0.89075   0.89721   0.90478   0.91102   0.91795
  Beta virt. eigenvalues --    0.92990   0.93657   0.94145   0.94780   0.95221
  Beta virt. eigenvalues --    0.96108   0.96560   0.97279   0.97489   0.98242
  Beta virt. eigenvalues --    0.98922   0.99665   1.00238   1.01122   1.01570
  Beta virt. eigenvalues --    1.01807   1.02853   1.03298   1.04216   1.05028
  Beta virt. eigenvalues --    1.05456   1.05930   1.06547   1.07341   1.07481
  Beta virt. eigenvalues --    1.07984   1.08774   1.09442   1.09630   1.10263
  Beta virt. eigenvalues --    1.10558   1.10995   1.11148   1.12286   1.12979
  Beta virt. eigenvalues --    1.13515   1.15274   1.16997   1.17408   1.18089
  Beta virt. eigenvalues --    1.19981   1.20061   1.21655   1.21833   1.23169
  Beta virt. eigenvalues --    1.23175   1.23352   1.23821   1.23854   1.24546
  Beta virt. eigenvalues --    1.25522   1.25614   1.26555   1.27088   1.27277
  Beta virt. eigenvalues --    1.28106   1.28445   1.28659   1.29830   1.30454
  Beta virt. eigenvalues --    1.31247   1.32631   1.32856   1.34006   1.34155
  Beta virt. eigenvalues --    1.34359   1.34486   1.35046   1.36589   1.36838
  Beta virt. eigenvalues --    1.36911   1.37355   1.37619   1.38228   1.38923
  Beta virt. eigenvalues --    1.40066   1.40112   1.40258   1.40432   1.40515
  Beta virt. eigenvalues --    1.40928   1.40995   1.41198   1.41587   1.42219
  Beta virt. eigenvalues --    1.42386   1.43188   1.44268   1.44996   1.46499
  Beta virt. eigenvalues --    1.46874   1.47655   1.49223   1.50846   1.53381
  Beta virt. eigenvalues --    1.54197   1.54956   1.55882   1.57292   1.58677
  Beta virt. eigenvalues --    1.59472   1.59966   1.60281   1.60962   1.61102
  Beta virt. eigenvalues --    1.62153   1.63469   1.65960   1.67158   1.68753
  Beta virt. eigenvalues --    1.69812   1.71256   1.71637   1.72863   1.73253
  Beta virt. eigenvalues --    1.74100   1.74636   1.74799   1.75422   1.76727
  Beta virt. eigenvalues --    1.76918   1.77140   1.77941   1.78128   1.78410
  Beta virt. eigenvalues --    1.78767   1.79053   1.79448   1.79706   1.80249
  Beta virt. eigenvalues --    1.80753   1.81096   1.81423   1.82112   1.83244
  Beta virt. eigenvalues --    1.83780   1.84939   1.85490   1.85944   1.86248
  Beta virt. eigenvalues --    1.86458   1.87301   1.88010   1.88516   1.89355
  Beta virt. eigenvalues --    1.89525   1.90090   1.90516   1.90966   1.91086
  Beta virt. eigenvalues --    1.91836   1.91999   1.92539   1.92747   1.93079
  Beta virt. eigenvalues --    1.93609   1.93837   1.94301   1.94541   1.95782
  Beta virt. eigenvalues --    1.97463   1.97781   1.98166   1.98905   1.99139
  Beta virt. eigenvalues --    1.99267   1.99362   1.99961   2.00157   2.01157
  Beta virt. eigenvalues --    2.01877   2.03242   2.03484   2.04284   2.04356
  Beta virt. eigenvalues --    2.05005   2.05248   2.05399   2.07056   2.08080
  Beta virt. eigenvalues --    2.08586   2.09622   2.10861   2.10876   2.12831
  Beta virt. eigenvalues --    2.13281   2.13657   2.14953   2.17203   2.17585
  Beta virt. eigenvalues --    2.18043   2.18909   2.19019   2.19870   2.21264
  Beta virt. eigenvalues --    2.23815   2.23945   2.24313   2.24911   2.26085
  Beta virt. eigenvalues --    2.26322   2.27038   2.27257   2.28337   2.28453
  Beta virt. eigenvalues --    2.28644   2.28911   2.29493   2.30002   2.31498
  Beta virt. eigenvalues --    2.31808   2.32776   2.33001   2.33284   2.33800
  Beta virt. eigenvalues --    2.34834   2.35891   2.36750   2.36980   2.37204
  Beta virt. eigenvalues --    2.37969   2.38392   2.38423   2.38861   2.39351
  Beta virt. eigenvalues --    2.40712   2.40787   2.40926   2.41425   2.42050
  Beta virt. eigenvalues --    2.42717   2.43488   2.43892   2.44155   2.44638
  Beta virt. eigenvalues --    2.45129   2.45530   2.45827   2.46441   2.46946
  Beta virt. eigenvalues --    2.47342   2.47625   2.48022   2.48559   2.49343
  Beta virt. eigenvalues --    2.49858   2.50700   2.51582   2.51990   2.52458
  Beta virt. eigenvalues --    2.53795   2.54023   2.55229   2.55376   2.55743
  Beta virt. eigenvalues --    2.56271   2.57001   2.57299   2.57513   2.57935
  Beta virt. eigenvalues --    2.58215   2.58318   2.58730   2.59328   2.60009
  Beta virt. eigenvalues --    2.60212   2.60531   2.61400   2.61791   2.62817
  Beta virt. eigenvalues --    2.63237   2.64230   2.65102   2.65595   2.66311
  Beta virt. eigenvalues --    2.67274   2.67798   2.68737   2.69701   2.70592
  Beta virt. eigenvalues --    2.70955   2.72049   2.72096   2.72499   2.73530
  Beta virt. eigenvalues --    2.73729   2.73925   2.74109   2.74198   2.74721
  Beta virt. eigenvalues --    2.74757   2.75909   2.77541   2.78060   2.78689
  Beta virt. eigenvalues --    2.79532   2.81357   2.81556   2.83750   2.85586
  Beta virt. eigenvalues --    2.86989   2.87212   2.87991   2.88260   2.89009
  Beta virt. eigenvalues --    2.91098   2.91983   2.94277   2.96096   2.97120
  Beta virt. eigenvalues --    2.98638   2.98852   2.99685   3.01078   3.02418
  Beta virt. eigenvalues --    3.03346   3.05829   3.06341   3.07487   3.07906
  Beta virt. eigenvalues --    3.10629   3.11419   3.12612   3.13950   3.16222
  Beta virt. eigenvalues --    3.17074   3.18502   3.18592   3.18897   3.19412
  Beta virt. eigenvalues --    3.20159   3.22460   3.23666   3.23787   3.23908
  Beta virt. eigenvalues --    3.24657   3.30411   3.30853   3.32158   3.32779
  Beta virt. eigenvalues --    3.36230   3.37352   3.38105   3.40960   3.46533
  Beta virt. eigenvalues --    3.47314   3.47728   3.47941   3.48222   3.49595
  Beta virt. eigenvalues --    3.50658   3.51130   3.53701   3.56005   3.57113
  Beta virt. eigenvalues --    3.57773   3.58380   3.60377   3.63039   3.87986
  Beta virt. eigenvalues --    3.88081   3.88741
          Condensed to atoms (all electrons):
 Mulliken atomic charges:
              1
     1  O   -0.587207
     2  C    0.159585
     3  C    0.523499
     4  C   -0.262538
     5  C   -0.219806
     6  O   -0.506614
     7  C    0.529041
     8  C    0.359695
     9  O   -0.467121
    10  O   -0.529121
    11  N   -0.328073
    12  N   -0.358423
    13  N   -0.231162
    14  C    0.041714
    15  C    0.098323
    16  C   -0.150625
    17  C   -0.105373
    18  C   -0.093979
    19  C   -0.140921
    20  C    0.263241
    21  N   -0.224819
    22  C    0.052724
    23  C    0.088680
    24  C    0.270440
    25  C   -0.150425
    26  C   -0.091843
    27  C   -0.110413
    28  C   -0.149271
    29  O   -0.518741
    30  N   -0.278579
    31  N   -0.401410
    32  C    0.109781
    33  C    0.033701
    34  C   -0.140543
    35  C   -0.116199
    36  C   -0.089863
    37  C   -0.130398
    38  C    0.286115
    39  O   -0.552671
    40  H    0.352398
    41  H    0.173876
    42  H    0.173109
    43  H    0.158365
    44  H    0.157984
    45  H    0.291741
    46  H    0.296493
    47  H    0.112137
    48  H    0.109155
    49  H    0.115235
    50  H    0.116163
    51  H    0.115639
    52  H    0.114985
    53  H    0.114698
    54  H    0.107562
    55  H    0.113013
    56  H    0.345291
    57  H    0.268415
    58  H    0.210884
    59  H    0.111368
    60  H    0.103910
    61  H    0.110554
    62  H    0.103419
    63  H    0.345439
    64  O   -0.554227
    65  H    0.338619
    66  H    0.113371
 Sum of Mulliken atomic charges =   0.00000
 Mulliken charges with hydrogens summed into heavy atoms:
              1
     1  O   -0.234809
     2  C    0.159585
     3  C    0.523499
     4  C    0.084448
     5  C    0.096543
     6  O   -0.506614
     7  C    0.529041
     8  C    0.359695
     9  O   -0.467121
    10  O   -0.529121
    11  N   -0.036332
    12  N   -0.061930
    13  N   -0.231162
    14  C    0.153851
    15  C    0.098323
    16  C   -0.037254
    17  C    0.003782
    18  C    0.021256
    19  C   -0.024759
    20  C    0.263241
    21  N   -0.224819
    22  C    0.168364
    23  C    0.088680
    24  C    0.270440
    25  C   -0.035440
    26  C    0.022856
    27  C   -0.002851
    28  C   -0.036258
    29  O   -0.173450
    30  N   -0.010164
    31  N   -0.401410
    32  C    0.320665
    33  C    0.033701
    34  C   -0.029175
    35  C   -0.012289
    36  C    0.020691
    37  C   -0.026979
    38  C    0.286115
    39  O   -0.207232
    64  O   -0.215607
 Sum of Mulliken charges with hydrogens summed into heavy atoms =   0.00000
          Atomic-Atomic Spin Densities.
              1          2          3          4          5          6
     1  O    0.000000   0.000000   0.000000   0.000000   0.000000   0.000000
     2  C    0.000000   0.000000   0.000000   0.000000   0.000000   0.000000
     3  C    0.000000   0.000000   0.000000   0.000000   0.000000   0.000000
     4  C    0.000000   0.000000   0.000000   0.000000   0.000000   0.000000
     5  C    0.000000   0.000000   0.000000   0.000000   0.000000   0.000000
     6  O    0.000000   0.000000   0.000000   0.000000   0.000000   0.000000
     7  C    0.000000   0.000000   0.000000   0.000000   0.000000   0.000000
     8  C    0.000000   0.000000   0.000000   0.000000   0.000000   0.000000
     9  O    0.000000   0.000000   0.000000   0.000000   0.000000   0.000000
    10  O    0.000000   0.000000   0.000000   0.000000   0.000000   0.000000
    11  N    0.000000   0.000000   0.000000   0.000000   0.000000   0.000000
    12  N    0.000000   0.000000   0.000000   0.000000   0.000000   0.000000
    13  N    0.000000   0.000000   0.000000   0.000000   0.000000   0.000000
    14  C    0.000000   0.000000   0.000000   0.000000   0.000000   0.000000
    15  C    0.000000   0.000000   0.000000   0.000000   0.000000   0.000000
    16  C    0.000000   0.000000   0.000000   0.000000   0.000000   0.000000
    17  C    0.000000   0.000000   0.000000   0.000000   0.000000   0.000000
    18  C    0.000000   0.000000   0.000000   0.000000   0.000000   0.000000
    19  C    0.000000   0.000000   0.000000   0.000000   0.000000   0.000000
    20  C    0.000000   0.000000   0.000000   0.000000   0.000000   0.000000
    21  N    0.000000   0.000000   0.000000   0.000000   0.000000   0.000000
    22  C    0.000000   0.000000   0.000000   0.000000   0.000000   0.000000
    23  C    0.000000   0.000000   0.000000   0.000000   0.000000   0.000000
    24  C    0.000000   0.000000   0.000000   0.000000   0.000000   0.000000
    25  C    0.000000   0.000000   0.000000   0.000000   0.000000   0.000000
    26  C    0.000000   0.000000   0.000000   0.000000   0.000000   0.000000
    27  C    0.000000   0.000000   0.000000   0.000000   0.000000   0.000000
    28  C    0.000000   0.000000   0.000000   0.000000   0.000000   0.000000
    29  O    0.000000   0.000000   0.000000   0.000000   0.000000   0.000000
    30  N    0.000000   0.000000   0.000000   0.000000   0.000000   0.000000
    31  N    0.000000   0.000000   0.000000   0.000000   0.000000   0.000000
    32  C    0.000000   0.000000   0.000000   0.000000   0.000000   0.000000
    33  C    0.000000   0.000000   0.000000   0.000000   0.000000   0.000000
    34  C    0.000000   0.000000   0.000000   0.000000   0.000000   0.000000
    35  C    0.000000   0.000000   0.000000   0.000000   0.000000   0.000000
    36  C    0.000000   0.000000   0.000000   0.000000   0.000000   0.000000
    37  C    0.000000   0.000000   0.000000   0.000000   0.000000   0.000000
    38  C    0.000000   0.000000   0.000000   0.000000   0.000000   0.000000
    39  O    0.000000   0.000000   0.000000   0.000000   0.000000   0.000000
    40  H    0.000000   0.000000   0.000000   0.000000   0.000000   0.000000
    41  H    0.000000   0.000000   0.000000   0.000000   0.000000   0.000000
    42  H    0.000000   0.000000   0.000000   0.000000   0.000000   0.000000
    43  H    0.000000   0.000000   0.000000   0.000000   0.000000   0.000000
    44  H    0.000000   0.000000   0.000000   0.000000   0.000000   0.000000
    45  H    0.000000   0.000000   0.000000   0.000000   0.000000   0.000000
    46  H    0.000000   0.000000   0.000000   0.000000   0.000000   0.000000
    47  H    0.000000   0.000000   0.000000   0.000000   0.000000   0.000000
    48  H    0.000000   0.000000   0.000000   0.000000   0.000000   0.000000
    49  H    0.000000   0.000000   0.000000   0.000000   0.000000   0.000000
    50  H    0.000000   0.000000   0.000000   0.000000   0.000000   0.000000
    51  H    0.000000   0.000000   0.000000   0.000000   0.000000   0.000000
    52  H    0.000000   0.000000   0.000000   0.000000   0.000000   0.000000
    53  H    0.000000   0.000000   0.000000   0.000000   0.000000   0.000000
    54  H    0.000000   0.000000   0.000000   0.000000   0.000000   0.000000
    55  H    0.000000   0.000000   0.000000   0.000000   0.000000   0.000000
    56  H    0.000000   0.000000   0.000000   0.000000   0.000000   0.000000
    57  H    0.000000   0.000000   0.000000   0.000000   0.000000   0.000000
    58  H    0.000000   0.000000   0.000000   0.000000   0.000000   0.000000
    59  H    0.000000   0.000000   0.000000   0.000000   0.000000   0.000000
    60  H    0.000000   0.000000   0.000000   0.000000   0.000000   0.000000
    61  H    0.000000   0.000000   0.000000   0.000000   0.000000   0.000000
    62  H    0.000000   0.000000   0.000000   0.000000   0.000000   0.000000
    63  H    0.000000   0.000000   0.000000   0.000000   0.000000   0.000000
    64  O    0.000000   0.000000   0.000000   0.000000   0.000000   0.000000
    65  H    0.000000   0.000000   0.000000   0.000000   0.000000   0.000000
    66  H    0.000000   0.000000   0.000000   0.000000   0.000000   0.000000
              7          8          9         10         11         12
     1  O    0.000000   0.000000   0.000000   0.000000   0.000000   0.000000
     2  C    0.000000   0.000000   0.000000   0.000000   0.000000   0.000000
     3  C    0.000000   0.000000   0.000000   0.000000   0.000000   0.000000
     4  C    0.000000   0.000000   0.000000   0.000000   0.000000   0.000000
     5  C    0.000000   0.000000   0.000000   0.000000   0.000000   0.000000
     6  O    0.000000   0.000000   0.000000   0.000000   0.000000   0.000000
     7  C    0.000000   0.000000   0.000000   0.000000   0.000000   0.000000
     8  C    0.000000   0.000000   0.000000   0.000000   0.000000   0.000000
     9  O    0.000000   0.000000   0.000000   0.000000   0.000000   0.000000
    10  O    0.000000   0.000000   0.000000   0.000000   0.000000   0.000000
    11  N    0.000000   0.000000   0.000000   0.000000   0.000000   0.000000
    12  N    0.000000   0.000000   0.000000   0.000000   0.000000   0.000000
    13  N    0.000000   0.000000   0.000000   0.000000   0.000000   0.000000
    14  C    0.000000   0.000000   0.000000   0.000000   0.000000   0.000000
    15  C    0.000000   0.000000   0.000000   0.000000   0.000000   0.000000
    16  C    0.000000   0.000000   0.000000   0.000000   0.000000   0.000000
    17  C    0.000000   0.000000   0.000000   0.000000   0.000000   0.000000
    18  C    0.000000   0.000000   0.000000   0.000000   0.000000   0.000000
    19  C    0.000000   0.000000   0.000000   0.000000   0.000000   0.000000
    20  C    0.000000   0.000000   0.000000   0.000000   0.000000   0.000000
    21  N    0.000000   0.000000   0.000000   0.000000   0.000000   0.000000
    22  C    0.000000   0.000000   0.000000   0.000000   0.000000   0.000000
    23  C    0.000000   0.000000   0.000000   0.000000   0.000000   0.000000
    24  C    0.000000   0.000000   0.000000   0.000000   0.000000   0.000000
    25  C    0.000000   0.000000   0.000000   0.000000   0.000000   0.000000
    26  C    0.000000   0.000000   0.000000   0.000000   0.000000   0.000000
    27  C    0.000000   0.000000   0.000000   0.000000   0.000000   0.000000
    28  C    0.000000   0.000000   0.000000   0.000000   0.000000   0.000000
    29  O    0.000000   0.000000   0.000000   0.000000   0.000000   0.000000
    30  N    0.000000   0.000000   0.000000   0.000000   0.000000   0.000000
    31  N    0.000000   0.000000   0.000000   0.000000   0.000000   0.000000
    32  C    0.000000   0.000000   0.000000   0.000000   0.000000   0.000000
    33  C    0.000000   0.000000   0.000000   0.000000   0.000000   0.000000
    34  C    0.000000   0.000000   0.000000   0.000000   0.000000   0.000000
    35  C    0.000000   0.000000   0.000000   0.000000   0.000000   0.000000
    36  C    0.000000   0.000000   0.000000   0.000000   0.000000   0.000000
    37  C    0.000000   0.000000   0.000000   0.000000   0.000000   0.000000
    38  C    0.000000   0.000000   0.000000   0.000000   0.000000   0.000000
    39  O    0.000000   0.000000   0.000000   0.000000   0.000000   0.000000
    40  H    0.000000   0.000000   0.000000   0.000000   0.000000   0.000000
    41  H    0.000000   0.000000   0.000000   0.000000   0.000000   0.000000
    42  H    0.000000   0.000000   0.000000   0.000000   0.000000   0.000000
    43  H    0.000000   0.000000   0.000000   0.000000   0.000000   0.000000
    44  H    0.000000   0.000000   0.000000   0.000000   0.000000   0.000000
    45  H    0.000000   0.000000   0.000000   0.000000   0.000000   0.000000
    46  H    0.000000   0.000000   0.000000   0.000000   0.000000   0.000000
    47  H    0.000000   0.000000   0.000000   0.000000   0.000000   0.000000
    48  H    0.000000   0.000000   0.000000   0.000000   0.000000   0.000000
    49  H    0.000000   0.000000   0.000000   0.000000   0.000000   0.000000
    50  H    0.000000   0.000000   0.000000   0.000000   0.000000   0.000000
    51  H    0.000000   0.000000   0.000000   0.000000   0.000000   0.000000
    52  H    0.000000   0.000000   0.000000   0.000000   0.000000   0.000000
    53  H    0.000000   0.000000   0.000000   0.000000   0.000000   0.000000
    54  H    0.000000   0.000000   0.000000   0.000000   0.000000   0.000000
    55  H    0.000000   0.000000   0.000000   0.000000   0.000000   0.000000
    56  H    0.000000   0.000000   0.000000   0.000000   0.000000   0.000000
    57  H    0.000000   0.000000   0.000000   0.000000   0.000000   0.000000
    58  H    0.000000   0.000000   0.000000   0.000000   0.000000   0.000000
    59  H    0.000000   0.000000   0.000000   0.000000   0.000000   0.000000
    60  H    0.000000   0.000000   0.000000   0.000000   0.000000   0.000000
    61  H    0.000000   0.000000   0.000000   0.000000   0.000000   0.000000
    62  H    0.000000   0.000000   0.000000   0.000000   0.000000   0.000000
    63  H    0.000000   0.000000   0.000000   0.000000   0.000000   0.000000
    64  O    0.000000   0.000000   0.000000   0.000000   0.000000   0.000000
    65  H    0.000000   0.000000   0.000000   0.000000   0.000000   0.000000
    66  H    0.000000   0.000000   0.000000   0.000000   0.000000   0.000000
             13         14         15         16         17         18
     1  O    0.000000   0.000000   0.000000   0.000000   0.000000   0.000000
     2  C    0.000000   0.000000   0.000000   0.000000   0.000000   0.000000
     3  C    0.000000   0.000000   0.000000   0.000000   0.000000   0.000000
     4  C    0.000000   0.000000   0.000000   0.000000   0.000000   0.000000
     5  C    0.000000   0.000000   0.000000   0.000000   0.000000   0.000000
     6  O    0.000000   0.000000   0.000000   0.000000   0.000000   0.000000
     7  C    0.000000   0.000000   0.000000   0.000000   0.000000   0.000000
     8  C    0.000000   0.000000   0.000000   0.000000   0.000000   0.000000
     9  O    0.000000   0.000000   0.000000   0.000000   0.000000   0.000000
    10  O    0.000000   0.000000   0.000000   0.000000   0.000000   0.000000
    11  N    0.000000   0.000000   0.000000   0.000000   0.000000   0.000000
    12  N    0.000000   0.000000   0.000000   0.000000   0.000000   0.000000
    13  N    0.000000   0.000000   0.000000   0.000000   0.000000   0.000000
    14  C    0.000000   0.000000   0.000000   0.000000   0.000000   0.000000
    15  C    0.000000   0.000000   0.000000   0.000000   0.000000   0.000000
    16  C    0.000000   0.000000   0.000000   0.000000   0.000000   0.000000
    17  C    0.000000   0.000000   0.000000   0.000000   0.000000   0.000000
    18  C    0.000000   0.000000   0.000000   0.000000   0.000000   0.000000
    19  C    0.000000   0.000000   0.000000   0.000000   0.000000   0.000000
    20  C    0.000000   0.000000   0.000000   0.000000   0.000000   0.000000
    21  N    0.000000   0.000000   0.000000   0.000000   0.000000   0.000000
    22  C    0.000000   0.000000   0.000000   0.000000   0.000000   0.000000
    23  C    0.000000   0.000000   0.000000   0.000000   0.000000   0.000000
    24  C    0.000000   0.000000   0.000000   0.000000   0.000000   0.000000
    25  C    0.000000   0.000000   0.000000   0.000000   0.000000   0.000000
    26  C    0.000000   0.000000   0.000000   0.000000   0.000000   0.000000
    27  C    0.000000   0.000000   0.000000   0.000000   0.000000   0.000000
    28  C    0.000000   0.000000   0.000000   0.000000   0.000000   0.000000
    29  O    0.000000   0.000000   0.000000   0.000000   0.000000   0.000000
    30  N    0.000000   0.000000   0.000000   0.000000   0.000000   0.000000
    31  N    0.000000   0.000000   0.000000   0.000000   0.000000   0.000000
    32  C    0.000000   0.000000   0.000000   0.000000   0.000000   0.000000
    33  C    0.000000   0.000000   0.000000   0.000000   0.000000   0.000000
    34  C    0.000000   0.000000   0.000000   0.000000   0.000000   0.000000
    35  C    0.000000   0.000000   0.000000   0.000000   0.000000   0.000000
    36  C    0.000000   0.000000   0.000000   0.000000   0.000000   0.000000
    37  C    0.000000   0.000000   0.000000   0.000000   0.000000   0.000000
    38  C    0.000000   0.000000   0.000000   0.000000   0.000000   0.000000
    39  O    0.000000   0.000000   0.000000   0.000000   0.000000   0.000000
    40  H    0.000000   0.000000   0.000000   0.000000   0.000000   0.000000
    41  H    0.000000   0.000000   0.000000   0.000000   0.000000   0.000000
    42  H    0.000000   0.000000   0.000000   0.000000   0.000000   0.000000
    43  H    0.000000   0.000000   0.000000   0.000000   0.000000   0.000000
    44  H    0.000000   0.000000   0.000000   0.000000   0.000000   0.000000
    45  H    0.000000   0.000000   0.000000   0.000000   0.000000   0.000000
    46  H    0.000000   0.000000   0.000000   0.000000   0.000000   0.000000
    47  H    0.000000   0.000000   0.000000   0.000000   0.000000   0.000000
    48  H    0.000000   0.000000   0.000000   0.000000   0.000000   0.000000
    49  H    0.000000   0.000000   0.000000   0.000000   0.000000   0.000000
    50  H    0.000000   0.000000   0.000000   0.000000   0.000000   0.000000
    51  H    0.000000   0.000000   0.000000   0.000000   0.000000   0.000000
    52  H    0.000000   0.000000   0.000000   0.000000   0.000000   0.000000
    53  H    0.000000   0.000000   0.000000   0.000000   0.000000   0.000000
    54  H    0.000000   0.000000   0.000000   0.000000   0.000000   0.000000
    55  H    0.000000   0.000000   0.000000   0.000000   0.000000   0.000000
    56  H    0.000000   0.000000   0.000000   0.000000   0.000000   0.000000
    57  H    0.000000   0.000000   0.000000   0.000000   0.000000   0.000000
    58  H    0.000000   0.000000   0.000000   0.000000   0.000000   0.000000
    59  H    0.000000   0.000000   0.000000   0.000000   0.000000   0.000000
    60  H    0.000000   0.000000   0.000000   0.000000   0.000000   0.000000
    61  H    0.000000   0.000000   0.000000   0.000000   0.000000   0.000000
    62  H    0.000000   0.000000   0.000000   0.000000   0.000000   0.000000
    63  H    0.000000   0.000000   0.000000   0.000000   0.000000   0.000000
    64  O    0.000000   0.000000   0.000000   0.000000   0.000000   0.000000
    65  H    0.000000   0.000000   0.000000   0.000000   0.000000   0.000000
    66  H    0.000000   0.000000   0.000000   0.000000   0.000000   0.000000
             19         20         21         22         23         24
     1  O    0.000000   0.000000   0.000000   0.000000   0.000000   0.000000
     2  C    0.000000   0.000000   0.000000   0.000000   0.000000   0.000000
     3  C    0.000000   0.000000   0.000000   0.000000   0.000000   0.000000
     4  C    0.000000   0.000000   0.000000   0.000000   0.000000   0.000000
     5  C    0.000000   0.000000   0.000000   0.000000   0.000000   0.000000
     6  O    0.000000   0.000000   0.000000   0.000000   0.000000   0.000000
     7  C    0.000000   0.000000   0.000000   0.000000   0.000000   0.000000
     8  C    0.000000   0.000000   0.000000   0.000000   0.000000   0.000000
     9  O    0.000000   0.000000   0.000000   0.000000   0.000000   0.000000
    10  O    0.000000   0.000000   0.000000   0.000000   0.000000   0.000000
    11  N    0.000000   0.000000   0.000000   0.000000   0.000000   0.000000
    12  N    0.000000   0.000000   0.000000   0.000000   0.000000   0.000000
    13  N    0.000000   0.000000   0.000000   0.000000   0.000000   0.000000
    14  C    0.000000   0.000000   0.000000   0.000000   0.000000   0.000000
    15  C    0.000000   0.000000   0.000000   0.000000   0.000000   0.000000
    16  C    0.000000   0.000000   0.000000   0.000000   0.000000   0.000000
    17  C    0.000000   0.000000   0.000000   0.000000   0.000000   0.000000
    18  C    0.000000   0.000000   0.000000   0.000000   0.000000   0.000000
    19  C    0.000000   0.000000   0.000000   0.000000   0.000000   0.000000
    20  C    0.000000   0.000000   0.000000   0.000000   0.000000   0.000000
    21  N    0.000000   0.000000   0.000000   0.000000   0.000000   0.000000
    22  C    0.000000   0.000000   0.000000   0.000000   0.000000   0.000000
    23  C    0.000000   0.000000   0.000000   0.000000   0.000000   0.000000
    24  C    0.000000   0.000000   0.000000   0.000000   0.000000   0.000000
    25  C    0.000000   0.000000   0.000000   0.000000   0.000000   0.000000
    26  C    0.000000   0.000000   0.000000   0.000000   0.000000   0.000000
    27  C    0.000000   0.000000   0.000000   0.000000   0.000000   0.000000
    28  C    0.000000   0.000000   0.000000   0.000000   0.000000   0.000000
    29  O    0.000000   0.000000   0.000000   0.000000   0.000000   0.000000
    30  N    0.000000   0.000000   0.000000   0.000000   0.000000   0.000000
    31  N    0.000000   0.000000   0.000000   0.000000   0.000000   0.000000
    32  C    0.000000   0.000000   0.000000   0.000000   0.000000   0.000000
    33  C    0.000000   0.000000   0.000000   0.000000   0.000000   0.000000
    34  C    0.000000   0.000000   0.000000   0.000000   0.000000   0.000000
    35  C    0.000000   0.000000   0.000000   0.000000   0.000000   0.000000
    36  C    0.000000   0.000000   0.000000   0.000000   0.000000   0.000000
    37  C    0.000000   0.000000   0.000000   0.000000   0.000000   0.000000
    38  C    0.000000   0.000000   0.000000   0.000000   0.000000   0.000000
    39  O    0.000000   0.000000   0.000000   0.000000   0.000000   0.000000
    40  H    0.000000   0.000000   0.000000   0.000000   0.000000   0.000000
    41  H    0.000000   0.000000   0.000000   0.000000   0.000000   0.000000
    42  H    0.000000   0.000000   0.000000   0.000000   0.000000   0.000000
    43  H    0.000000   0.000000   0.000000   0.000000   0.000000   0.000000
    44  H    0.000000   0.000000   0.000000   0.000000   0.000000   0.000000
    45  H    0.000000   0.000000   0.000000   0.000000   0.000000   0.000000
    46  H    0.000000   0.000000   0.000000   0.000000   0.000000   0.000000
    47  H    0.000000   0.000000   0.000000   0.000000   0.000000   0.000000
    48  H    0.000000   0.000000   0.000000   0.000000   0.000000   0.000000
    49  H    0.000000   0.000000   0.000000   0.000000   0.000000   0.000000
    50  H    0.000000   0.000000   0.000000   0.000000   0.000000   0.000000
    51  H    0.000000   0.000000   0.000000   0.000000   0.000000   0.000000
    52  H    0.000000   0.000000   0.000000   0.000000   0.000000   0.000000
    53  H    0.000000   0.000000   0.000000   0.000000   0.000000   0.000000
    54  H    0.000000   0.000000   0.000000   0.000000   0.000000   0.000000
    55  H    0.000000   0.000000   0.000000   0.000000   0.000000   0.000000
    56  H    0.000000   0.000000   0.000000   0.000000   0.000000   0.000000
    57  H    0.000000   0.000000   0.000000   0.000000   0.000000   0.000000
    58  H    0.000000   0.000000   0.000000   0.000000   0.000000   0.000000
    59  H    0.000000   0.000000   0.000000   0.000000   0.000000   0.000000
    60  H    0.000000   0.000000   0.000000   0.000000   0.000000   0.000000
    61  H    0.000000   0.000000   0.000000   0.000000   0.000000   0.000000
    62  H    0.000000   0.000000   0.000000   0.000000   0.000000   0.000000
    63  H    0.000000   0.000000   0.000000   0.000000   0.000000   0.000000
    64  O    0.000000   0.000000   0.000000   0.000000   0.000000   0.000000
    65  H    0.000000   0.000000   0.000000   0.000000   0.000000   0.000000
    66  H    0.000000   0.000000   0.000000   0.000000   0.000000   0.000000
             25         26         27         28         29         30
     1  O    0.000000   0.000000   0.000000   0.000000   0.000000   0.000000
     2  C    0.000000   0.000000   0.000000   0.000000   0.000000   0.000000
     3  C    0.000000   0.000000   0.000000   0.000000   0.000000   0.000000
     4  C    0.000000   0.000000   0.000000   0.000000   0.000000   0.000000
     5  C    0.000000   0.000000   0.000000   0.000000   0.000000   0.000000
     6  O    0.000000   0.000000   0.000000   0.000000   0.000000   0.000000
     7  C    0.000000   0.000000   0.000000   0.000000   0.000000   0.000000
     8  C    0.000000   0.000000   0.000000   0.000000   0.000000   0.000000
     9  O    0.000000   0.000000   0.000000   0.000000   0.000000   0.000000
    10  O    0.000000   0.000000   0.000000   0.000000   0.000000   0.000000
    11  N    0.000000   0.000000   0.000000   0.000000   0.000000   0.000000
    12  N    0.000000   0.000000   0.000000   0.000000   0.000000   0.000000
    13  N    0.000000   0.000000   0.000000   0.000000   0.000000   0.000000
    14  C    0.000000   0.000000   0.000000   0.000000   0.000000   0.000000
    15  C    0.000000   0.000000   0.000000   0.000000   0.000000   0.000000
    16  C    0.000000   0.000000   0.000000   0.000000   0.000000   0.000000
    17  C    0.000000   0.000000   0.000000   0.000000   0.000000   0.000000
    18  C    0.000000   0.000000   0.000000   0.000000   0.000000   0.000000
    19  C    0.000000   0.000000   0.000000   0.000000   0.000000   0.000000
    20  C    0.000000   0.000000   0.000000   0.000000   0.000000   0.000000
    21  N    0.000000   0.000000   0.000000   0.000000   0.000000   0.000000
    22  C    0.000000   0.000000   0.000000   0.000000   0.000000   0.000000
    23  C    0.000000   0.000000   0.000000   0.000000   0.000000   0.000000
    24  C    0.000000   0.000000   0.000000   0.000000   0.000000   0.000000
    25  C    0.000000   0.000000   0.000000   0.000000   0.000000   0.000000
    26  C    0.000000   0.000000   0.000000   0.000000   0.000000   0.000000
    27  C    0.000000   0.000000   0.000000   0.000000   0.000000   0.000000
    28  C    0.000000   0.000000   0.000000   0.000000   0.000000   0.000000
    29  O    0.000000   0.000000   0.000000   0.000000   0.000000   0.000000
    30  N    0.000000   0.000000   0.000000   0.000000   0.000000   0.000000
    31  N    0.000000   0.000000   0.000000   0.000000   0.000000   0.000000
    32  C    0.000000   0.000000   0.000000   0.000000   0.000000   0.000000
    33  C    0.000000   0.000000   0.000000   0.000000   0.000000   0.000000
    34  C    0.000000   0.000000   0.000000   0.000000   0.000000   0.000000
    35  C    0.000000   0.000000   0.000000   0.000000   0.000000   0.000000
    36  C    0.000000   0.000000   0.000000   0.000000   0.000000   0.000000
    37  C    0.000000   0.000000   0.000000   0.000000   0.000000   0.000000
    38  C    0.000000   0.000000   0.000000   0.000000   0.000000   0.000000
    39  O    0.000000   0.000000   0.000000   0.000000   0.000000   0.000000
    40  H    0.000000   0.000000   0.000000   0.000000   0.000000   0.000000
    41  H    0.000000   0.000000   0.000000   0.000000   0.000000   0.000000
    42  H    0.000000   0.000000   0.000000   0.000000   0.000000   0.000000
    43  H    0.000000   0.000000   0.000000   0.000000   0.000000   0.000000
    44  H    0.000000   0.000000   0.000000   0.000000   0.000000   0.000000
    45  H    0.000000   0.000000   0.000000   0.000000   0.000000   0.000000
    46  H    0.000000   0.000000   0.000000   0.000000   0.000000   0.000000
    47  H    0.000000   0.000000   0.000000   0.000000   0.000000   0.000000
    48  H    0.000000   0.000000   0.000000   0.000000   0.000000   0.000000
    49  H    0.000000   0.000000   0.000000   0.000000   0.000000   0.000000
    50  H    0.000000   0.000000   0.000000   0.000000   0.000000   0.000000
    51  H    0.000000   0.000000   0.000000   0.000000   0.000000   0.000000
    52  H    0.000000   0.000000   0.000000   0.000000   0.000000   0.000000
    53  H    0.000000   0.000000   0.000000   0.000000   0.000000   0.000000
    54  H    0.000000   0.000000   0.000000   0.000000   0.000000   0.000000
    55  H    0.000000   0.000000   0.000000   0.000000   0.000000   0.000000
    56  H    0.000000   0.000000   0.000000   0.000000   0.000000   0.000000
    57  H    0.000000   0.000000   0.000000   0.000000   0.000000   0.000000
    58  H    0.000000   0.000000   0.000000   0.000000   0.000000   0.000000
    59  H    0.000000   0.000000   0.000000   0.000000   0.000000   0.000000
    60  H    0.000000   0.000000   0.000000   0.000000   0.000000   0.000000
    61  H    0.000000   0.000000   0.000000   0.000000   0.000000   0.000000
    62  H    0.000000   0.000000   0.000000   0.000000   0.000000   0.000000
    63  H    0.000000   0.000000   0.000000   0.000000   0.000000   0.000000
    64  O    0.000000   0.000000   0.000000   0.000000   0.000000   0.000000
    65  H    0.000000   0.000000   0.000000   0.000000   0.000000   0.000000
    66  H    0.000000   0.000000   0.000000   0.000000   0.000000   0.000000
             31         32         33         34         35         36
     1  O    0.000000   0.000000   0.000000   0.000000   0.000000   0.000000
     2  C    0.000000   0.000000   0.000000   0.000000   0.000000   0.000000
     3  C    0.000000   0.000000   0.000000   0.000000   0.000000   0.000000
     4  C    0.000000   0.000000   0.000000   0.000000   0.000000   0.000000
     5  C    0.000000   0.000000   0.000000   0.000000   0.000000   0.000000
     6  O    0.000000   0.000000   0.000000   0.000000   0.000000   0.000000
     7  C    0.000000   0.000000   0.000000   0.000000   0.000000   0.000000
     8  C    0.000000   0.000000   0.000000   0.000000   0.000000   0.000000
     9  O    0.000000   0.000000   0.000000   0.000000   0.000000   0.000000
    10  O    0.000000   0.000000   0.000000   0.000000   0.000000   0.000000
    11  N    0.000000   0.000000   0.000000   0.000000   0.000000   0.000000
    12  N    0.000000   0.000000   0.000000   0.000000   0.000000   0.000000
    13  N    0.000000   0.000000   0.000000   0.000000   0.000000   0.000000
    14  C    0.000000   0.000000   0.000000   0.000000   0.000000   0.000000
    15  C    0.000000   0.000000   0.000000   0.000000   0.000000   0.000000
    16  C    0.000000   0.000000   0.000000   0.000000   0.000000   0.000000
    17  C    0.000000   0.000000   0.000000   0.000000   0.000000   0.000000
    18  C    0.000000   0.000000   0.000000   0.000000   0.000000   0.000000
    19  C    0.000000   0.000000   0.000000   0.000000   0.000000   0.000000
    20  C    0.000000   0.000000   0.000000   0.000000   0.000000   0.000000
    21  N    0.000000   0.000000   0.000000   0.000000   0.000000   0.000000
    22  C    0.000000   0.000000   0.000000   0.000000   0.000000   0.000000
    23  C    0.000000   0.000000   0.000000   0.000000   0.000000   0.000000
    24  C    0.000000   0.000000   0.000000   0.000000   0.000000   0.000000
    25  C    0.000000   0.000000   0.000000   0.000000   0.000000   0.000000
    26  C    0.000000   0.000000   0.000000   0.000000   0.000000   0.000000
    27  C    0.000000   0.000000   0.000000   0.000000   0.000000   0.000000
    28  C    0.000000   0.000000   0.000000   0.000000   0.000000   0.000000
    29  O    0.000000   0.000000   0.000000   0.000000   0.000000   0.000000
    30  N    0.000000   0.000000   0.000000   0.000000   0.000000   0.000000
    31  N    0.000000   0.000000   0.000000   0.000000   0.000000   0.000000
    32  C    0.000000   0.000000   0.000000   0.000000   0.000000   0.000000
    33  C    0.000000   0.000000   0.000000   0.000000   0.000000   0.000000
    34  C    0.000000   0.000000   0.000000   0.000000   0.000000   0.000000
    35  C    0.000000   0.000000   0.000000   0.000000   0.000000   0.000000
    36  C    0.000000   0.000000   0.000000   0.000000   0.000000   0.000000
    37  C    0.000000   0.000000   0.000000   0.000000   0.000000   0.000000
    38  C    0.000000   0.000000   0.000000   0.000000   0.000000   0.000000
    39  O    0.000000   0.000000   0.000000   0.000000   0.000000   0.000000
    40  H    0.000000   0.000000   0.000000   0.000000   0.000000   0.000000
    41  H    0.000000   0.000000   0.000000   0.000000   0.000000   0.000000
    42  H    0.000000   0.000000   0.000000   0.000000   0.000000   0.000000
    43  H    0.000000   0.000000   0.000000   0.000000   0.000000   0.000000
    44  H    0.000000   0.000000   0.000000   0.000000   0.000000   0.000000
    45  H    0.000000   0.000000   0.000000   0.000000   0.000000   0.000000
    46  H    0.000000   0.000000   0.000000   0.000000   0.000000   0.000000
    47  H    0.000000   0.000000   0.000000   0.000000   0.000000   0.000000
    48  H    0.000000   0.000000   0.000000   0.000000   0.000000   0.000000
    49  H    0.000000   0.000000   0.000000   0.000000   0.000000   0.000000
    50  H    0.000000   0.000000   0.000000   0.000000   0.000000   0.000000
    51  H    0.000000   0.000000   0.000000   0.000000   0.000000   0.000000
    52  H    0.000000   0.000000   0.000000   0.000000   0.000000   0.000000
    53  H    0.000000   0.000000   0.000000   0.000000   0.000000   0.000000
    54  H    0.000000   0.000000   0.000000   0.000000   0.000000   0.000000
    55  H    0.000000   0.000000   0.000000   0.000000   0.000000   0.000000
    56  H    0.000000   0.000000   0.000000   0.000000   0.000000   0.000000
    57  H    0.000000   0.000000   0.000000   0.000000   0.000000   0.000000
    58  H    0.000000   0.000000   0.000000   0.000000   0.000000   0.000000
    59  H    0.000000   0.000000   0.000000   0.000000   0.000000   0.000000
    60  H    0.000000   0.000000   0.000000   0.000000   0.000000   0.000000
    61  H    0.000000   0.000000   0.000000   0.000000   0.000000   0.000000
    62  H    0.000000   0.000000   0.000000   0.000000   0.000000   0.000000
    63  H    0.000000   0.000000   0.000000   0.000000   0.000000   0.000000
    64  O    0.000000   0.000000   0.000000   0.000000   0.000000   0.000000
    65  H    0.000000   0.000000   0.000000   0.000000   0.000000   0.000000
    66  H    0.000000   0.000000   0.000000   0.000000   0.000000   0.000000
             37         38         39         40         41         42
     1  O    0.000000   0.000000   0.000000   0.000000   0.000000   0.000000
     2  C    0.000000   0.000000   0.000000   0.000000   0.000000   0.000000
     3  C    0.000000   0.000000   0.000000   0.000000   0.000000   0.000000
     4  C    0.000000   0.000000   0.000000   0.000000   0.000000   0.000000
     5  C    0.000000   0.000000   0.000000   0.000000   0.000000   0.000000
     6  O    0.000000   0.000000   0.000000   0.000000   0.000000   0.000000
     7  C    0.000000   0.000000   0.000000   0.000000   0.000000   0.000000
     8  C    0.000000   0.000000   0.000000   0.000000   0.000000   0.000000
     9  O    0.000000   0.000000   0.000000   0.000000   0.000000   0.000000
    10  O    0.000000   0.000000   0.000000   0.000000   0.000000   0.000000
    11  N    0.000000   0.000000   0.000000   0.000000   0.000000   0.000000
    12  N    0.000000   0.000000   0.000000   0.000000   0.000000   0.000000
    13  N    0.000000   0.000000   0.000000   0.000000   0.000000   0.000000
    14  C    0.000000   0.000000   0.000000   0.000000   0.000000   0.000000
    15  C    0.000000   0.000000   0.000000   0.000000   0.000000   0.000000
    16  C    0.000000   0.000000   0.000000   0.000000   0.000000   0.000000
    17  C    0.000000   0.000000   0.000000   0.000000   0.000000   0.000000
    18  C    0.000000   0.000000   0.000000   0.000000   0.000000   0.000000
    19  C    0.000000   0.000000   0.000000   0.000000   0.000000   0.000000
    20  C    0.000000   0.000000   0.000000   0.000000   0.000000   0.000000
    21  N    0.000000   0.000000   0.000000   0.000000   0.000000   0.000000
    22  C    0.000000   0.000000   0.000000   0.000000   0.000000   0.000000
    23  C    0.000000   0.000000   0.000000   0.000000   0.000000   0.000000
    24  C    0.000000   0.000000   0.000000   0.000000   0.000000   0.000000
    25  C    0.000000   0.000000   0.000000   0.000000   0.000000   0.000000
    26  C    0.000000   0.000000   0.000000   0.000000   0.000000   0.000000
    27  C    0.000000   0.000000   0.000000   0.000000   0.000000   0.000000
    28  C    0.000000   0.000000   0.000000   0.000000   0.000000   0.000000
    29  O    0.000000   0.000000   0.000000   0.000000   0.000000   0.000000
    30  N    0.000000   0.000000   0.000000   0.000000   0.000000   0.000000
    31  N    0.000000   0.000000   0.000000   0.000000   0.000000   0.000000
    32  C    0.000000   0.000000   0.000000   0.000000   0.000000   0.000000
    33  C    0.000000   0.000000   0.000000   0.000000   0.000000   0.000000
    34  C    0.000000   0.000000   0.000000   0.000000   0.000000   0.000000
    35  C    0.000000   0.000000   0.000000   0.000000   0.000000   0.000000
    36  C    0.000000   0.000000   0.000000   0.000000   0.000000   0.000000
    37  C    0.000000   0.000000   0.000000   0.000000   0.000000   0.000000
    38  C    0.000000   0.000000   0.000000   0.000000   0.000000   0.000000
    39  O    0.000000   0.000000   0.000000   0.000000   0.000000   0.000000
    40  H    0.000000   0.000000   0.000000   0.000000   0.000000   0.000000
    41  H    0.000000   0.000000   0.000000   0.000000   0.000000   0.000000
    42  H    0.000000   0.000000   0.000000   0.000000   0.000000   0.000000
    43  H    0.000000   0.000000   0.000000   0.000000   0.000000   0.000000
    44  H    0.000000   0.000000   0.000000   0.000000   0.000000   0.000000
    45  H    0.000000   0.000000   0.000000   0.000000   0.000000   0.000000
    46  H    0.000000   0.000000   0.000000   0.000000   0.000000   0.000000
    47  H    0.000000   0.000000   0.000000   0.000000   0.000000   0.000000
    48  H    0.000000   0.000000   0.000000   0.000000   0.000000   0.000000
    49  H    0.000000   0.000000   0.000000   0.000000   0.000000   0.000000
    50  H    0.000000   0.000000   0.000000   0.000000   0.000000   0.000000
    51  H    0.000000   0.000000   0.000000   0.000000   0.000000   0.000000
    52  H    0.000000   0.000000   0.000000   0.000000   0.000000   0.000000
    53  H    0.000000   0.000000   0.000000   0.000000   0.000000   0.000000
    54  H    0.000000   0.000000   0.000000   0.000000   0.000000   0.000000
    55  H    0.000000   0.000000   0.000000   0.000000   0.000000   0.000000
    56  H    0.000000   0.000000   0.000000   0.000000   0.000000   0.000000
    57  H    0.000000   0.000000   0.000000   0.000000   0.000000   0.000000
    58  H    0.000000   0.000000   0.000000   0.000000   0.000000   0.000000
    59  H    0.000000   0.000000   0.000000   0.000000   0.000000   0.000000
    60  H    0.000000   0.000000   0.000000   0.000000   0.000000   0.000000
    61  H    0.000000   0.000000   0.000000   0.000000   0.000000   0.000000
    62  H    0.000000   0.000000   0.000000   0.000000   0.000000   0.000000
    63  H    0.000000   0.000000   0.000000   0.000000   0.000000   0.000000
    64  O    0.000000   0.000000   0.000000   0.000000   0.000000   0.000000
    65  H    0.000000   0.000000   0.000000   0.000000   0.000000   0.000000
    66  H    0.000000   0.000000   0.000000   0.000000   0.000000   0.000000
             43         44         45         46         47         48
     1  O    0.000000   0.000000   0.000000   0.000000   0.000000   0.000000
     2  C    0.000000   0.000000   0.000000   0.000000   0.000000   0.000000
     3  C    0.000000   0.000000   0.000000   0.000000   0.000000   0.000000
     4  C    0.000000   0.000000   0.000000   0.000000   0.000000   0.000000
     5  C    0.000000   0.000000   0.000000   0.000000   0.000000   0.000000
     6  O    0.000000   0.000000   0.000000   0.000000   0.000000   0.000000
     7  C    0.000000   0.000000   0.000000   0.000000   0.000000   0.000000
     8  C    0.000000   0.000000   0.000000   0.000000   0.000000   0.000000
     9  O    0.000000   0.000000   0.000000   0.000000   0.000000   0.000000
    10  O    0.000000   0.000000   0.000000   0.000000   0.000000   0.000000
    11  N    0.000000   0.000000   0.000000   0.000000   0.000000   0.000000
    12  N    0.000000   0.000000   0.000000   0.000000   0.000000   0.000000
    13  N    0.000000   0.000000   0.000000   0.000000   0.000000   0.000000
    14  C    0.000000   0.000000   0.000000   0.000000   0.000000   0.000000
    15  C    0.000000   0.000000   0.000000   0.000000   0.000000   0.000000
    16  C    0.000000   0.000000   0.000000   0.000000   0.000000   0.000000
    17  C    0.000000   0.000000   0.000000   0.000000   0.000000   0.000000
    18  C    0.000000   0.000000   0.000000   0.000000   0.000000   0.000000
    19  C    0.000000   0.000000   0.000000   0.000000   0.000000   0.000000
    20  C    0.000000   0.000000   0.000000   0.000000   0.000000   0.000000
    21  N    0.000000   0.000000   0.000000   0.000000   0.000000   0.000000
    22  C    0.000000   0.000000   0.000000   0.000000   0.000000   0.000000
    23  C    0.000000   0.000000   0.000000   0.000000   0.000000   0.000000
    24  C    0.000000   0.000000   0.000000   0.000000   0.000000   0.000000
    25  C    0.000000   0.000000   0.000000   0.000000   0.000000   0.000000
    26  C    0.000000   0.000000   0.000000   0.000000   0.000000   0.000000
    27  C    0.000000   0.000000   0.000000   0.000000   0.000000   0.000000
    28  C    0.000000   0.000000   0.000000   0.000000   0.000000   0.000000
    29  O    0.000000   0.000000   0.000000   0.000000   0.000000   0.000000
    30  N    0.000000   0.000000   0.000000   0.000000   0.000000   0.000000
    31  N    0.000000   0.000000   0.000000   0.000000   0.000000   0.000000
    32  C    0.000000   0.000000   0.000000   0.000000   0.000000   0.000000
    33  C    0.000000   0.000000   0.000000   0.000000   0.000000   0.000000
    34  C    0.000000   0.000000   0.000000   0.000000   0.000000   0.000000
    35  C    0.000000   0.000000   0.000000   0.000000   0.000000   0.000000
    36  C    0.000000   0.000000   0.000000   0.000000   0.000000   0.000000
    37  C    0.000000   0.000000   0.000000   0.000000   0.000000   0.000000
    38  C    0.000000   0.000000   0.000000   0.000000   0.000000   0.000000
    39  O    0.000000   0.000000   0.000000   0.000000   0.000000   0.000000
    40  H    0.000000   0.000000   0.000000   0.000000   0.000000   0.000000
    41  H    0.000000   0.000000   0.000000   0.000000   0.000000   0.000000
    42  H    0.000000   0.000000   0.000000   0.000000   0.000000   0.000000
    43  H    0.000000   0.000000   0.000000   0.000000   0.000000   0.000000
    44  H    0.000000   0.000000   0.000000   0.000000   0.000000   0.000000
    45  H    0.000000   0.000000   0.000000   0.000000   0.000000   0.000000
    46  H    0.000000   0.000000   0.000000   0.000000   0.000000   0.000000
    47  H    0.000000   0.000000   0.000000   0.000000   0.000000   0.000000
    48  H    0.000000   0.000000   0.000000   0.000000   0.000000   0.000000
    49  H    0.000000   0.000000   0.000000   0.000000   0.000000   0.000000
    50  H    0.000000   0.000000   0.000000   0.000000   0.000000   0.000000
    51  H    0.000000   0.000000   0.000000   0.000000   0.000000   0.000000
    52  H    0.000000   0.000000   0.000000   0.000000   0.000000   0.000000
    53  H    0.000000   0.000000   0.000000   0.000000   0.000000   0.000000
    54  H    0.000000   0.000000   0.000000   0.000000   0.000000   0.000000
    55  H    0.000000   0.000000   0.000000   0.000000   0.000000   0.000000
    56  H    0.000000   0.000000   0.000000   0.000000   0.000000   0.000000
    57  H    0.000000   0.000000   0.000000   0.000000   0.000000   0.000000
    58  H    0.000000   0.000000   0.000000   0.000000   0.000000   0.000000
    59  H    0.000000   0.000000   0.000000   0.000000   0.000000   0.000000
    60  H    0.000000   0.000000   0.000000   0.000000   0.000000   0.000000
    61  H    0.000000   0.000000   0.000000   0.000000   0.000000   0.000000
    62  H    0.000000   0.000000   0.000000   0.000000   0.000000   0.000000
    63  H    0.000000   0.000000   0.000000   0.000000   0.000000   0.000000
    64  O    0.000000   0.000000   0.000000   0.000000   0.000000   0.000000
    65  H    0.000000   0.000000   0.000000   0.000000   0.000000   0.000000
    66  H    0.000000   0.000000   0.000000   0.000000   0.000000   0.000000
             49         50         51         52         53         54
     1  O    0.000000   0.000000   0.000000   0.000000   0.000000   0.000000
     2  C    0.000000   0.000000   0.000000   0.000000   0.000000   0.000000
     3  C    0.000000   0.000000   0.000000   0.000000   0.000000   0.000000
     4  C    0.000000   0.000000   0.000000   0.000000   0.000000   0.000000
     5  C    0.000000   0.000000   0.000000   0.000000   0.000000   0.000000
     6  O    0.000000   0.000000   0.000000   0.000000   0.000000   0.000000
     7  C    0.000000   0.000000   0.000000   0.000000   0.000000   0.000000
     8  C    0.000000   0.000000   0.000000   0.000000   0.000000   0.000000
     9  O    0.000000   0.000000   0.000000   0.000000   0.000000   0.000000
    10  O    0.000000   0.000000   0.000000   0.000000   0.000000   0.000000
    11  N    0.000000   0.000000   0.000000   0.000000   0.000000   0.000000
    12  N    0.000000   0.000000   0.000000   0.000000   0.000000   0.000000
    13  N    0.000000   0.000000   0.000000   0.000000   0.000000   0.000000
    14  C    0.000000   0.000000   0.000000   0.000000   0.000000   0.000000
    15  C    0.000000   0.000000   0.000000   0.000000   0.000000   0.000000
    16  C    0.000000   0.000000   0.000000   0.000000   0.000000   0.000000
    17  C    0.000000   0.000000   0.000000   0.000000   0.000000   0.000000
    18  C    0.000000   0.000000   0.000000   0.000000   0.000000   0.000000
    19  C    0.000000   0.000000   0.000000   0.000000   0.000000   0.000000
    20  C    0.000000   0.000000   0.000000   0.000000   0.000000   0.000000
    21  N    0.000000   0.000000   0.000000   0.000000   0.000000   0.000000
    22  C    0.000000   0.000000   0.000000   0.000000   0.000000   0.000000
    23  C    0.000000   0.000000   0.000000   0.000000   0.000000   0.000000
    24  C    0.000000   0.000000   0.000000   0.000000   0.000000   0.000000
    25  C    0.000000   0.000000   0.000000   0.000000   0.000000   0.000000
    26  C    0.000000   0.000000   0.000000   0.000000   0.000000   0.000000
    27  C    0.000000   0.000000   0.000000   0.000000   0.000000   0.000000
    28  C    0.000000   0.000000   0.000000   0.000000   0.000000   0.000000
    29  O    0.000000   0.000000   0.000000   0.000000   0.000000   0.000000
    30  N    0.000000   0.000000   0.000000   0.000000   0.000000   0.000000
    31  N    0.000000   0.000000   0.000000   0.000000   0.000000   0.000000
    32  C    0.000000   0.000000   0.000000   0.000000   0.000000   0.000000
    33  C    0.000000   0.000000   0.000000   0.000000   0.000000   0.000000
    34  C    0.000000   0.000000   0.000000   0.000000   0.000000   0.000000
    35  C    0.000000   0.000000   0.000000   0.000000   0.000000   0.000000
    36  C    0.000000   0.000000   0.000000   0.000000   0.000000   0.000000
    37  C    0.000000   0.000000   0.000000   0.000000   0.000000   0.000000
    38  C    0.000000   0.000000   0.000000   0.000000   0.000000   0.000000
    39  O    0.000000   0.000000   0.000000   0.000000   0.000000   0.000000
    40  H    0.000000   0.000000   0.000000   0.000000   0.000000   0.000000
    41  H    0.000000   0.000000   0.000000   0.000000   0.000000   0.000000
    42  H    0.000000   0.000000   0.000000   0.000000   0.000000   0.000000
    43  H    0.000000   0.000000   0.000000   0.000000   0.000000   0.000000
    44  H    0.000000   0.000000   0.000000   0.000000   0.000000   0.000000
    45  H    0.000000   0.000000   0.000000   0.000000   0.000000   0.000000
    46  H    0.000000   0.000000   0.000000   0.000000   0.000000   0.000000
    47  H    0.000000   0.000000   0.000000   0.000000   0.000000   0.000000
    48  H    0.000000   0.000000   0.000000   0.000000   0.000000   0.000000
    49  H    0.000000   0.000000   0.000000   0.000000   0.000000   0.000000
    50  H    0.000000   0.000000   0.000000   0.000000   0.000000   0.000000
    51  H    0.000000   0.000000   0.000000   0.000000   0.000000   0.000000
    52  H    0.000000   0.000000   0.000000   0.000000   0.000000   0.000000
    53  H    0.000000   0.000000   0.000000   0.000000   0.000000   0.000000
    54  H    0.000000   0.000000   0.000000   0.000000   0.000000   0.000000
    55  H    0.000000   0.000000   0.000000   0.000000   0.000000   0.000000
    56  H    0.000000   0.000000   0.000000   0.000000   0.000000   0.000000
    57  H    0.000000   0.000000   0.000000   0.000000   0.000000   0.000000
    58  H    0.000000   0.000000   0.000000   0.000000   0.000000   0.000000
    59  H    0.000000   0.000000   0.000000   0.000000   0.000000   0.000000
    60  H    0.000000   0.000000   0.000000   0.000000   0.000000   0.000000
    61  H    0.000000   0.000000   0.000000   0.000000   0.000000   0.000000
    62  H    0.000000   0.000000   0.000000   0.000000   0.000000   0.000000
    63  H    0.000000   0.000000   0.000000   0.000000   0.000000   0.000000
    64  O    0.000000   0.000000   0.000000   0.000000   0.000000   0.000000
    65  H    0.000000   0.000000   0.000000   0.000000   0.000000   0.000000
    66  H    0.000000   0.000000   0.000000   0.000000   0.000000   0.000000
             55         56         57         58         59         60
     1  O    0.000000   0.000000   0.000000   0.000000   0.000000   0.000000
     2  C    0.000000   0.000000   0.000000   0.000000   0.000000   0.000000
     3  C    0.000000   0.000000   0.000000   0.000000   0.000000   0.000000
     4  C    0.000000   0.000000   0.000000   0.000000   0.000000   0.000000
     5  C    0.000000   0.000000   0.000000   0.000000   0.000000   0.000000
     6  O    0.000000   0.000000   0.000000   0.000000   0.000000   0.000000
     7  C    0.000000   0.000000   0.000000   0.000000   0.000000   0.000000
     8  C    0.000000   0.000000   0.000000   0.000000   0.000000   0.000000
     9  O    0.000000   0.000000   0.000000   0.000000   0.000000   0.000000
    10  O    0.000000   0.000000   0.000000   0.000000   0.000000   0.000000
    11  N    0.000000   0.000000   0.000000   0.000000   0.000000   0.000000
    12  N    0.000000   0.000000   0.000000   0.000000   0.000000   0.000000
    13  N    0.000000   0.000000   0.000000   0.000000   0.000000   0.000000
    14  C    0.000000   0.000000   0.000000   0.000000   0.000000   0.000000
    15  C    0.000000   0.000000   0.000000   0.000000   0.000000   0.000000
    16  C    0.000000   0.000000   0.000000   0.000000   0.000000   0.000000
    17  C    0.000000   0.000000   0.000000   0.000000   0.000000   0.000000
    18  C    0.000000   0.000000   0.000000   0.000000   0.000000   0.000000
    19  C    0.000000   0.000000   0.000000   0.000000   0.000000   0.000000
    20  C    0.000000   0.000000   0.000000   0.000000   0.000000   0.000000
    21  N    0.000000   0.000000   0.000000   0.000000   0.000000   0.000000
    22  C    0.000000   0.000000   0.000000   0.000000   0.000000   0.000000
    23  C    0.000000   0.000000   0.000000   0.000000   0.000000   0.000000
    24  C    0.000000   0.000000   0.000000   0.000000   0.000000   0.000000
    25  C    0.000000   0.000000   0.000000   0.000000   0.000000   0.000000
    26  C    0.000000   0.000000   0.000000   0.000000   0.000000   0.000000
    27  C    0.000000   0.000000   0.000000   0.000000   0.000000   0.000000
    28  C    0.000000   0.000000   0.000000   0.000000   0.000000   0.000000
    29  O    0.000000   0.000000   0.000000   0.000000   0.000000   0.000000
    30  N    0.000000   0.000000   0.000000   0.000000   0.000000   0.000000
    31  N    0.000000   0.000000   0.000000   0.000000   0.000000   0.000000
    32  C    0.000000   0.000000   0.000000   0.000000   0.000000   0.000000
    33  C    0.000000   0.000000   0.000000   0.000000   0.000000   0.000000
    34  C    0.000000   0.000000   0.000000   0.000000   0.000000   0.000000
    35  C    0.000000   0.000000   0.000000   0.000000   0.000000   0.000000
    36  C    0.000000   0.000000   0.000000   0.000000   0.000000   0.000000
    37  C    0.000000   0.000000   0.000000   0.000000   0.000000   0.000000
    38  C    0.000000   0.000000   0.000000   0.000000   0.000000   0.000000
    39  O    0.000000   0.000000   0.000000   0.000000   0.000000   0.000000
    40  H    0.000000   0.000000   0.000000   0.000000   0.000000   0.000000
    41  H    0.000000   0.000000   0.000000   0.000000   0.000000   0.000000
    42  H    0.000000   0.000000   0.000000   0.000000   0.000000   0.000000
    43  H    0.000000   0.000000   0.000000   0.000000   0.000000   0.000000
    44  H    0.000000   0.000000   0.000000   0.000000   0.000000   0.000000
    45  H    0.000000   0.000000   0.000000   0.000000   0.000000   0.000000
    46  H    0.000000   0.000000   0.000000   0.000000   0.000000   0.000000
    47  H    0.000000   0.000000   0.000000   0.000000   0.000000   0.000000
    48  H    0.000000   0.000000   0.000000   0.000000   0.000000   0.000000
    49  H    0.000000   0.000000   0.000000   0.000000   0.000000   0.000000
    50  H    0.000000   0.000000   0.000000   0.000000   0.000000   0.000000
    51  H    0.000000   0.000000   0.000000   0.000000   0.000000   0.000000
    52  H    0.000000   0.000000   0.000000   0.000000   0.000000   0.000000
    53  H    0.000000   0.000000   0.000000   0.000000   0.000000   0.000000
    54  H    0.000000   0.000000   0.000000   0.000000   0.000000   0.000000
    55  H    0.000000   0.000000   0.000000   0.000000   0.000000   0.000000
    56  H    0.000000   0.000000   0.000000   0.000000   0.000000   0.000000
    57  H    0.000000   0.000000   0.000000   0.000000   0.000000   0.000000
    58  H    0.000000   0.000000   0.000000   0.000000   0.000000   0.000000
    59  H    0.000000   0.000000   0.000000   0.000000   0.000000   0.000000
    60  H    0.000000   0.000000   0.000000   0.000000   0.000000   0.000000
    61  H    0.000000   0.000000   0.000000   0.000000   0.000000   0.000000
    62  H    0.000000   0.000000   0.000000   0.000000   0.000000   0.000000
    63  H    0.000000   0.000000   0.000000   0.000000   0.000000   0.000000
    64  O    0.000000   0.000000   0.000000   0.000000   0.000000   0.000000
    65  H    0.000000   0.000000   0.000000   0.000000   0.000000   0.000000
    66  H    0.000000   0.000000   0.000000   0.000000   0.000000   0.000000
             61         62         63         64         65         66
     1  O    0.000000   0.000000   0.000000   0.000000   0.000000   0.000000
     2  C    0.000000   0.000000   0.000000   0.000000   0.000000   0.000000
     3  C    0.000000   0.000000   0.000000   0.000000   0.000000   0.000000
     4  C    0.000000   0.000000   0.000000   0.000000   0.000000   0.000000
     5  C    0.000000   0.000000   0.000000   0.000000   0.000000   0.000000
     6  O    0.000000   0.000000   0.000000   0.000000   0.000000   0.000000
     7  C    0.000000   0.000000   0.000000   0.000000   0.000000   0.000000
     8  C    0.000000   0.000000   0.000000   0.000000   0.000000   0.000000
     9  O    0.000000   0.000000   0.000000   0.000000   0.000000   0.000000
    10  O    0.000000   0.000000   0.000000   0.000000   0.000000   0.000000
    11  N    0.000000   0.000000   0.000000   0.000000   0.000000   0.000000
    12  N    0.000000   0.000000   0.000000   0.000000   0.000000   0.000000
    13  N    0.000000   0.000000   0.000000   0.000000   0.000000   0.000000
    14  C    0.000000   0.000000   0.000000   0.000000   0.000000   0.000000
    15  C    0.000000   0.000000   0.000000   0.000000   0.000000   0.000000
    16  C    0.000000   0.000000   0.000000   0.000000   0.000000   0.000000
    17  C    0.000000   0.000000   0.000000   0.000000   0.000000   0.000000
    18  C    0.000000   0.000000   0.000000   0.000000   0.000000   0.000000
    19  C    0.000000   0.000000   0.000000   0.000000   0.000000   0.000000
    20  C    0.000000   0.000000   0.000000   0.000000   0.000000   0.000000
    21  N    0.000000   0.000000   0.000000   0.000000   0.000000   0.000000
    22  C    0.000000   0.000000   0.000000   0.000000   0.000000   0.000000
    23  C    0.000000   0.000000   0.000000   0.000000   0.000000   0.000000
    24  C    0.000000   0.000000   0.000000   0.000000   0.000000   0.000000
    25  C    0.000000   0.000000   0.000000   0.000000   0.000000   0.000000
    26  C    0.000000   0.000000   0.000000   0.000000   0.000000   0.000000
    27  C    0.000000   0.000000   0.000000   0.000000   0.000000   0.000000
    28  C    0.000000   0.000000   0.000000   0.000000   0.000000   0.000000
    29  O    0.000000   0.000000   0.000000   0.000000   0.000000   0.000000
    30  N    0.000000   0.000000   0.000000   0.000000   0.000000   0.000000
    31  N    0.000000   0.000000   0.000000   0.000000   0.000000   0.000000
    32  C    0.000000   0.000000   0.000000   0.000000   0.000000   0.000000
    33  C    0.000000   0.000000   0.000000   0.000000   0.000000   0.000000
    34  C    0.000000   0.000000   0.000000   0.000000   0.000000   0.000000
    35  C    0.000000   0.000000   0.000000   0.000000   0.000000   0.000000
    36  C    0.000000   0.000000   0.000000   0.000000   0.000000   0.000000
    37  C    0.000000   0.000000   0.000000   0.000000   0.000000   0.000000
    38  C    0.000000   0.000000   0.000000   0.000000   0.000000   0.000000
    39  O    0.000000   0.000000   0.000000   0.000000   0.000000   0.000000
    40  H    0.000000   0.000000   0.000000   0.000000   0.000000   0.000000
    41  H    0.000000   0.000000   0.000000   0.000000   0.000000   0.000000
    42  H    0.000000   0.000000   0.000000   0.000000   0.000000   0.000000
    43  H    0.000000   0.000000   0.000000   0.000000   0.000000   0.000000
    44  H    0.000000   0.000000   0.000000   0.000000   0.000000   0.000000
    45  H    0.000000   0.000000   0.000000   0.000000   0.000000   0.000000
    46  H    0.000000   0.000000   0.000000   0.000000   0.000000   0.000000
    47  H    0.000000   0.000000   0.000000   0.000000   0.000000   0.000000
    48  H    0.000000   0.000000   0.000000   0.000000   0.000000   0.000000
    49  H    0.000000   0.000000   0.000000   0.000000   0.000000   0.000000
    50  H    0.000000   0.000000   0.000000   0.000000   0.000000   0.000000
    51  H    0.000000   0.000000   0.000000   0.000000   0.000000   0.000000
    52  H    0.000000   0.000000   0.000000   0.000000   0.000000   0.000000
    53  H    0.000000   0.000000   0.000000   0.000000   0.000000   0.000000
    54  H    0.000000   0.000000   0.000000   0.000000   0.000000   0.000000
    55  H    0.000000   0.000000   0.000000   0.000000   0.000000   0.000000
    56  H    0.000000   0.000000   0.000000   0.000000   0.000000   0.000000
    57  H    0.000000   0.000000   0.000000   0.000000   0.000000   0.000000
    58  H    0.000000   0.000000   0.000000   0.000000   0.000000   0.000000
    59  H    0.000000   0.000000   0.000000   0.000000   0.000000   0.000000
    60  H    0.000000   0.000000   0.000000   0.000000   0.000000   0.000000
    61  H    0.000000   0.000000   0.000000   0.000000   0.000000   0.000000
    62  H    0.000000   0.000000   0.000000   0.000000   0.000000   0.000000
    63  H    0.000000   0.000000   0.000000   0.000000   0.000000   0.000000
    64  O    0.000000   0.000000   0.000000   0.000000   0.000000   0.000000
    65  H    0.000000   0.000000   0.000000   0.000000   0.000000   0.000000
    66  H    0.000000   0.000000   0.000000   0.000000   0.000000   0.000000
 Mulliken atomic spin densities:
              1
     1  O    0.000000
     2  C    0.000000
     3  C    0.000000
     4  C    0.000000
     5  C    0.000000
     6  O    0.000000
     7  C    0.000000
     8  C    0.000000
     9  O    0.000000
    10  O    0.000000
    11  N    0.000000
    12  N    0.000000
    13  N    0.000000
    14  C    0.000000
    15  C    0.000000
    16  C    0.000000
    17  C    0.000000
    18  C    0.000000
    19  C    0.000000
    20  C    0.000000
    21  N    0.000000
    22  C    0.000000
    23  C    0.000000
    24  C    0.000000
    25  C    0.000000
    26  C    0.000000
    27  C    0.000000
    28  C    0.000000
    29  O    0.000000
    30  N    0.000000
    31  N    0.000000
    32  C    0.000000
    33  C    0.000000
    34  C    0.000000
    35  C    0.000000
    36  C    0.000000
    37  C    0.000000
    38  C    0.000000
    39  O    0.000000
    40  H    0.000000
    41  H    0.000000
    42  H    0.000000
    43  H    0.000000
    44  H    0.000000
    45  H    0.000000
    46  H    0.000000
    47  H    0.000000
    48  H    0.000000
    49  H    0.000000
    50  H    0.000000
    51  H    0.000000
    52  H    0.000000
    53  H    0.000000
    54  H    0.000000
    55  H    0.000000
    56  H    0.000000
    57  H    0.000000
    58  H    0.000000
    59  H    0.000000
    60  H    0.000000
    61  H    0.000000
    62  H    0.000000
    63  H    0.000000
    64  O    0.000000
    65  H    0.000000
    66  H    0.000000
 Sum of Mulliken atomic spin densities =   0.00000
 Electronic spatial extent (au):  <R**2>=          34370.6047
 Charge=              0.0000 electrons
 Dipole moment (field-independent basis, Debye):
    X=             -0.1226    Y=              6.6992    Z=              2.9960  Tot=              7.3396
 Quadrupole moment (field-independent basis, Debye-Ang):
   XX=           -139.2099   YY=           -213.7746   ZZ=           -227.5544
   XY=             29.2078   XZ=              2.9556   YZ=             -9.5895
 Traceless Quadrupole moment (field-independent basis, Debye-Ang):
   XX=             54.3030   YY=            -20.2616   ZZ=            -34.0414
   XY=             29.2078   XZ=              2.9556   YZ=             -9.5895
 Octapole moment (field-independent basis, Debye-Ang**2):
  XXX=           -436.5214  YYY=            340.6968  ZZZ=             -8.2291  XYY=              2.8828
  XXY=             56.4418  XXZ=             52.5915  XZZ=            -25.6055  YZZ=             14.9615
  YYZ=            -46.7804  XYZ=             37.6527
 Hexadecapole moment (field-independent basis, Debye-Ang**3):
 XXXX=         -23131.4414 YYYY=         -11611.9114 ZZZZ=          -1193.6924 XXXY=           -221.0109
 XXXZ=            527.1861 YYYX=            723.0134 YYYZ=           -579.6280 ZZZX=             93.4504
 ZZZY=            -19.8415 XXYY=          -6553.6171 XXZZ=          -5641.2090 YYZZ=          -2346.1136
 XXYZ=           -497.3015 YYXZ=            -27.1021 ZZXY=             15.2983
 N-N= 4.219795818072D+03 E-N=-1.931038925212D+04  KE= 2.830968256045D+03
                          Isotropic Fermi Contact Couplings
        Atom                 a.u.       MegaHertz       Gauss      10(-4) cm-1
     1  O(17)              0.00000       0.00000       0.00000       0.00000
     2  C(13)              0.00000       0.00000       0.00000       0.00000
     3  C(13)              0.00000       0.00000       0.00000       0.00000
     4  C(13)              0.00000       0.00000       0.00000       0.00000
     5  C(13)              0.00000       0.00000       0.00000       0.00000
     6  O(17)              0.00000       0.00000       0.00000       0.00000
     7  C(13)              0.00000       0.00000       0.00000       0.00000
     8  C(13)              0.00000       0.00000       0.00000       0.00000
     9  O(17)              0.00000       0.00000       0.00000       0.00000
    10  O(17)              0.00000       0.00000       0.00000       0.00000
    11  N(14)              0.00000       0.00000       0.00000       0.00000
    12  N(14)              0.00000       0.00000       0.00000       0.00000
    13  N(14)              0.00000       0.00000       0.00000       0.00000
    14  C(13)              0.00000       0.00000       0.00000       0.00000
    15  C(13)              0.00000       0.00000       0.00000       0.00000
    16  C(13)              0.00000       0.00000       0.00000       0.00000
    17  C(13)              0.00000       0.00000       0.00000       0.00000
    18  C(13)              0.00000       0.00000       0.00000       0.00000
    19  C(13)              0.00000       0.00000       0.00000       0.00000
    20  C(13)              0.00000       0.00000       0.00000       0.00000
    21  N(14)              0.00000       0.00000       0.00000       0.00000
    22  C(13)              0.00000       0.00000       0.00000       0.00000
    23  C(13)              0.00000       0.00000       0.00000       0.00000
    24  C(13)              0.00000       0.00000       0.00000       0.00000
    25  C(13)              0.00000       0.00000       0.00000       0.00000
    26  C(13)              0.00000       0.00000       0.00000       0.00000
    27  C(13)              0.00000       0.00000       0.00000       0.00000
    28  C(13)              0.00000       0.00000       0.00000       0.00000
    29  O(17)              0.00000       0.00000       0.00000       0.00000
    30  N(14)              0.00000       0.00000       0.00000       0.00000
    31  N(14)              0.00000       0.00000       0.00000       0.00000
    32  C(13)              0.00000       0.00000       0.00000       0.00000
    33  C(13)              0.00000       0.00000       0.00000       0.00000
    34  C(13)              0.00000       0.00000       0.00000       0.00000
    35  C(13)              0.00000       0.00000       0.00000       0.00000
    36  C(13)              0.00000       0.00000       0.00000       0.00000
    37  C(13)              0.00000       0.00000       0.00000       0.00000
    38  C(13)              0.00000       0.00000       0.00000       0.00000
    39  O(17)              0.00000       0.00000       0.00000       0.00000
    40  H(1)               0.00000       0.00000       0.00000       0.00000
    41  H(1)               0.00000       0.00000       0.00000       0.00000
    42  H(1)               0.00000       0.00000       0.00000       0.00000
    43  H(1)               0.00000       0.00000       0.00000       0.00000
    44  H(1)               0.00000       0.00000       0.00000       0.00000
    45  H(1)               0.00000       0.00000       0.00000       0.00000
    46  H(1)               0.00000       0.00000       0.00000       0.00000
    47  H(1)               0.00000       0.00000       0.00000       0.00000
    48  H(1)               0.00000       0.00000       0.00000       0.00000
    49  H(1)               0.00000       0.00000       0.00000       0.00000
    50  H(1)               0.00000       0.00000       0.00000       0.00000
    51  H(1)               0.00000       0.00000       0.00000       0.00000
    52  H(1)               0.00000       0.00000       0.00000       0.00000
    53  H(1)               0.00000       0.00000       0.00000       0.00000
    54  H(1)               0.00000       0.00000       0.00000       0.00000
    55  H(1)               0.00000       0.00000       0.00000       0.00000
    56  H(1)               0.00000       0.00000       0.00000       0.00000
    57  H(1)               0.00000       0.00000       0.00000       0.00000
    58  H(1)               0.00000       0.00000       0.00000       0.00000
    59  H(1)               0.00000       0.00000       0.00000       0.00000
    60  H(1)               0.00000       0.00000       0.00000       0.00000
    61  H(1)               0.00000       0.00000       0.00000       0.00000
    62  H(1)               0.00000       0.00000       0.00000       0.00000
    63  H(1)               0.00000       0.00000       0.00000       0.00000
    64  O(17)              0.00000       0.00000       0.00000       0.00000
    65  H(1)               0.00000       0.00000       0.00000       0.00000
    66  H(1)               0.00000       0.00000       0.00000       0.00000
 --------------------------------------------------------
       Center         ----  Spin Dipole Couplings  ----
                      3XX-RR        3YY-RR        3ZZ-RR
 --------------------------------------------------------
     1   Atom        0.000000      0.000000      0.000000
     2   Atom        0.000000      0.000000      0.000000
     3   Atom        0.000000      0.000000      0.000000
     4   Atom        0.000000      0.000000      0.000000
     5   Atom        0.000000      0.000000      0.000000
     6   Atom        0.000000      0.000000      0.000000
     7   Atom        0.000000      0.000000      0.000000
     8   Atom        0.000000      0.000000      0.000000
     9   Atom        0.000000      0.000000      0.000000
    10   Atom        0.000000      0.000000      0.000000
    11   Atom        0.000000      0.000000      0.000000
    12   Atom        0.000000      0.000000      0.000000
    13   Atom        0.000000      0.000000      0.000000
    14   Atom        0.000000      0.000000      0.000000
    15   Atom        0.000000      0.000000      0.000000
    16   Atom        0.000000      0.000000      0.000000
    17   Atom        0.000000      0.000000      0.000000
    18   Atom        0.000000      0.000000      0.000000
    19   Atom        0.000000      0.000000      0.000000
    20   Atom        0.000000      0.000000      0.000000
    21   Atom        0.000000      0.000000      0.000000
    22   Atom        0.000000      0.000000      0.000000
    23   Atom        0.000000      0.000000      0.000000
    24   Atom        0.000000      0.000000      0.000000
    25   Atom        0.000000      0.000000      0.000000
    26   Atom        0.000000      0.000000      0.000000
    27   Atom        0.000000      0.000000      0.000000
    28   Atom        0.000000      0.000000      0.000000
    29   Atom        0.000000      0.000000      0.000000
    30   Atom        0.000000      0.000000      0.000000
    31   Atom        0.000000      0.000000      0.000000
    32   Atom        0.000000      0.000000      0.000000
    33   Atom        0.000000      0.000000      0.000000
    34   Atom        0.000000      0.000000      0.000000
    35   Atom        0.000000      0.000000      0.000000
    36   Atom        0.000000      0.000000      0.000000
    37   Atom        0.000000      0.000000      0.000000
    38   Atom        0.000000      0.000000      0.000000
    39   Atom        0.000000      0.000000      0.000000
    40   Atom        0.000000      0.000000      0.000000
    41   Atom        0.000000      0.000000      0.000000
    42   Atom        0.000000      0.000000      0.000000
    43   Atom        0.000000      0.000000      0.000000
    44   Atom        0.000000      0.000000      0.000000
    45   Atom        0.000000      0.000000      0.000000
    46   Atom        0.000000      0.000000      0.000000
    47   Atom        0.000000      0.000000      0.000000
    48   Atom        0.000000      0.000000      0.000000
    49   Atom        0.000000      0.000000      0.000000
    50   Atom        0.000000      0.000000      0.000000
    51   Atom        0.000000      0.000000      0.000000
    52   Atom        0.000000      0.000000      0.000000
    53   Atom        0.000000      0.000000      0.000000
    54   Atom        0.000000      0.000000      0.000000
    55   Atom        0.000000      0.000000      0.000000
    56   Atom        0.000000      0.000000      0.000000
    57   Atom        0.000000      0.000000      0.000000
    58   Atom        0.000000      0.000000      0.000000
    59   Atom        0.000000      0.000000      0.000000
    60   Atom        0.000000      0.000000      0.000000
    61   Atom        0.000000      0.000000      0.000000
    62   Atom        0.000000      0.000000      0.000000
    63   Atom        0.000000      0.000000      0.000000
    64   Atom        0.000000      0.000000      0.000000
    65   Atom        0.000000      0.000000      0.000000
    66   Atom        0.000000      0.000000      0.000000
 --------------------------------------------------------
                        XY            XZ            YZ
 --------------------------------------------------------
     1   Atom        0.000000      0.000000      0.000000
     2   Atom        0.000000      0.000000      0.000000
     3   Atom        0.000000      0.000000      0.000000
     4   Atom        0.000000      0.000000      0.000000
     5   Atom        0.000000      0.000000      0.000000
     6   Atom        0.000000      0.000000      0.000000
     7   Atom        0.000000      0.000000      0.000000
     8   Atom        0.000000      0.000000      0.000000
     9   Atom        0.000000      0.000000      0.000000
    10   Atom        0.000000      0.000000      0.000000
    11   Atom        0.000000      0.000000      0.000000
    12   Atom        0.000000      0.000000      0.000000
    13   Atom        0.000000      0.000000      0.000000
    14   Atom        0.000000      0.000000      0.000000
    15   Atom        0.000000      0.000000      0.000000
    16   Atom        0.000000      0.000000      0.000000
    17   Atom        0.000000      0.000000      0.000000
    18   Atom        0.000000      0.000000      0.000000
    19   Atom        0.000000      0.000000      0.000000
    20   Atom        0.000000      0.000000      0.000000
    21   Atom        0.000000      0.000000      0.000000
    22   Atom        0.000000      0.000000      0.000000
    23   Atom        0.000000      0.000000      0.000000
    24   Atom        0.000000      0.000000      0.000000
    25   Atom        0.000000      0.000000      0.000000
    26   Atom        0.000000      0.000000      0.000000
    27   Atom        0.000000      0.000000      0.000000
    28   Atom        0.000000      0.000000      0.000000
    29   Atom        0.000000      0.000000      0.000000
    30   Atom        0.000000      0.000000      0.000000
    31   Atom        0.000000      0.000000      0.000000
    32   Atom        0.000000      0.000000      0.000000
    33   Atom        0.000000      0.000000      0.000000
    34   Atom        0.000000      0.000000      0.000000
    35   Atom        0.000000      0.000000      0.000000
    36   Atom        0.000000      0.000000      0.000000
    37   Atom        0.000000      0.000000      0.000000
    38   Atom        0.000000      0.000000      0.000000
    39   Atom        0.000000      0.000000      0.000000
    40   Atom        0.000000      0.000000      0.000000
    41   Atom        0.000000      0.000000      0.000000
    42   Atom        0.000000      0.000000      0.000000
    43   Atom        0.000000      0.000000      0.000000
    44   Atom        0.000000      0.000000      0.000000
    45   Atom        0.000000      0.000000      0.000000
    46   Atom        0.000000      0.000000      0.000000
    47   Atom        0.000000      0.000000      0.000000
    48   Atom        0.000000      0.000000      0.000000
    49   Atom        0.000000      0.000000      0.000000
    50   Atom        0.000000      0.000000      0.000000
    51   Atom        0.000000      0.000000      0.000000
    52   Atom        0.000000      0.000000      0.000000
    53   Atom        0.000000      0.000000      0.000000
    54   Atom        0.000000      0.000000      0.000000
    55   Atom        0.000000      0.000000      0.000000
    56   Atom        0.000000      0.000000      0.000000
    57   Atom        0.000000      0.000000      0.000000
    58   Atom        0.000000      0.000000      0.000000
    59   Atom        0.000000      0.000000      0.000000
    60   Atom        0.000000      0.000000      0.000000
    61   Atom        0.000000      0.000000      0.000000
    62   Atom        0.000000      0.000000      0.000000
    63   Atom        0.000000      0.000000      0.000000
    64   Atom        0.000000      0.000000      0.000000
    65   Atom        0.000000      0.000000      0.000000
    66   Atom        0.000000      0.000000      0.000000
 --------------------------------------------------------


 ---------------------------------------------------------------------------------
              Anisotropic Spin Dipole Couplings in Principal Axis System
 ---------------------------------------------------------------------------------

       Atom             a.u.   MegaHertz   Gauss  10(-4) cm-1        Axes

              Baa     0.0000     0.000     0.000     0.000  1.0000  0.0000  0.0000
     1 O(17)  Bbb     0.0000     0.000     0.000     0.000  0.0000  1.0000  0.0000
              Bcc     0.0000     0.000     0.000     0.000  0.0000  0.0000  1.0000
 
              Baa     0.0000     0.000     0.000     0.000  1.0000  0.0000  0.0000
     2 C(13)  Bbb     0.0000     0.000     0.000     0.000  0.0000  1.0000  0.0000
              Bcc     0.0000     0.000     0.000     0.000  0.0000  0.0000  1.0000
 
              Baa     0.0000     0.000     0.000     0.000  1.0000  0.0000  0.0000
     3 C(13)  Bbb     0.0000     0.000     0.000     0.000  0.0000  1.0000  0.0000
              Bcc     0.0000     0.000     0.000     0.000  0.0000  0.0000  1.0000
 
              Baa     0.0000     0.000     0.000     0.000  1.0000  0.0000  0.0000
     4 C(13)  Bbb     0.0000     0.000     0.000     0.000  0.0000  1.0000  0.0000
              Bcc     0.0000     0.000     0.000     0.000  0.0000  0.0000  1.0000
 
              Baa     0.0000     0.000     0.000     0.000  1.0000  0.0000  0.0000
     5 C(13)  Bbb     0.0000     0.000     0.000     0.000  0.0000  1.0000  0.0000
              Bcc     0.0000     0.000     0.000     0.000  0.0000  0.0000  1.0000
 
              Baa     0.0000     0.000     0.000     0.000  1.0000  0.0000  0.0000
     6 O(17)  Bbb     0.0000     0.000     0.000     0.000  0.0000  1.0000  0.0000
              Bcc     0.0000     0.000     0.000     0.000  0.0000  0.0000  1.0000
 
              Baa     0.0000     0.000     0.000     0.000  1.0000  0.0000  0.0000
     7 C(13)  Bbb     0.0000     0.000     0.000     0.000  0.0000  1.0000  0.0000
              Bcc     0.0000     0.000     0.000     0.000  0.0000  0.0000  1.0000
 
              Baa     0.0000     0.000     0.000     0.000  1.0000  0.0000  0.0000
     8 C(13)  Bbb     0.0000     0.000     0.000     0.000  0.0000  1.0000  0.0000
              Bcc     0.0000     0.000     0.000     0.000  0.0000  0.0000  1.0000
 
              Baa     0.0000     0.000     0.000     0.000  1.0000  0.0000  0.0000
     9 O(17)  Bbb     0.0000     0.000     0.000     0.000  0.0000  1.0000  0.0000
              Bcc     0.0000     0.000     0.000     0.000  0.0000  0.0000  1.0000
 
              Baa     0.0000     0.000     0.000     0.000  1.0000  0.0000  0.0000
    10 O(17)  Bbb     0.0000     0.000     0.000     0.000  0.0000  1.0000  0.0000
              Bcc     0.0000     0.000     0.000     0.000  0.0000  0.0000  1.0000
 
              Baa     0.0000     0.000     0.000     0.000  1.0000  0.0000  0.0000
    11 N(14)  Bbb     0.0000     0.000     0.000     0.000  0.0000  1.0000  0.0000
              Bcc     0.0000     0.000     0.000     0.000  0.0000  0.0000  1.0000
 
              Baa     0.0000     0.000     0.000     0.000  1.0000  0.0000  0.0000
    12 N(14)  Bbb     0.0000     0.000     0.000     0.000  0.0000  1.0000  0.0000
              Bcc     0.0000     0.000     0.000     0.000  0.0000  0.0000  1.0000
 
              Baa     0.0000     0.000     0.000     0.000  1.0000  0.0000  0.0000
    13 N(14)  Bbb     0.0000     0.000     0.000     0.000  0.0000  1.0000  0.0000
              Bcc     0.0000     0.000     0.000     0.000  0.0000  0.0000  1.0000
 
              Baa     0.0000     0.000     0.000     0.000  1.0000  0.0000  0.0000
    14 C(13)  Bbb     0.0000     0.000     0.000     0.000  0.0000  1.0000  0.0000
              Bcc     0.0000     0.000     0.000     0.000  0.0000  0.0000  1.0000
 
              Baa     0.0000     0.000     0.000     0.000  1.0000  0.0000  0.0000
    15 C(13)  Bbb     0.0000     0.000     0.000     0.000  0.0000  1.0000  0.0000
              Bcc     0.0000     0.000     0.000     0.000  0.0000  0.0000  1.0000
 
              Baa     0.0000     0.000     0.000     0.000  1.0000  0.0000  0.0000
    16 C(13)  Bbb     0.0000     0.000     0.000     0.000  0.0000  1.0000  0.0000
              Bcc     0.0000     0.000     0.000     0.000  0.0000  0.0000  1.0000
 
              Baa     0.0000     0.000     0.000     0.000  1.0000  0.0000  0.0000
    17 C(13)  Bbb     0.0000     0.000     0.000     0.000  0.0000  1.0000  0.0000
              Bcc     0.0000     0.000     0.000     0.000  0.0000  0.0000  1.0000
 
              Baa     0.0000     0.000     0.000     0.000  1.0000  0.0000  0.0000
    18 C(13)  Bbb     0.0000     0.000     0.000     0.000  0.0000  1.0000  0.0000
              Bcc     0.0000     0.000     0.000     0.000  0.0000  0.0000  1.0000
 
              Baa     0.0000     0.000     0.000     0.000  1.0000  0.0000  0.0000
    19 C(13)  Bbb     0.0000     0.000     0.000     0.000  0.0000  1.0000  0.0000
              Bcc     0.0000     0.000     0.000     0.000  0.0000  0.0000  1.0000
 
              Baa     0.0000     0.000     0.000     0.000  1.0000  0.0000  0.0000
    20 C(13)  Bbb     0.0000     0.000     0.000     0.000  0.0000  1.0000  0.0000
              Bcc     0.0000     0.000     0.000     0.000  0.0000  0.0000  1.0000
 
              Baa     0.0000     0.000     0.000     0.000  1.0000  0.0000  0.0000
    21 N(14)  Bbb     0.0000     0.000     0.000     0.000  0.0000  1.0000  0.0000
              Bcc     0.0000     0.000     0.000     0.000  0.0000  0.0000  1.0000
 
              Baa     0.0000     0.000     0.000     0.000  1.0000  0.0000  0.0000
    22 C(13)  Bbb     0.0000     0.000     0.000     0.000  0.0000  1.0000  0.0000
              Bcc     0.0000     0.000     0.000     0.000  0.0000  0.0000  1.0000
 
              Baa     0.0000     0.000     0.000     0.000  1.0000  0.0000  0.0000
    23 C(13)  Bbb     0.0000     0.000     0.000     0.000  0.0000  1.0000  0.0000
              Bcc     0.0000     0.000     0.000     0.000  0.0000  0.0000  1.0000
 
              Baa     0.0000     0.000     0.000     0.000  1.0000  0.0000  0.0000
    24 C(13)  Bbb     0.0000     0.000     0.000     0.000  0.0000  1.0000  0.0000
              Bcc     0.0000     0.000     0.000     0.000  0.0000  0.0000  1.0000
 
              Baa     0.0000     0.000     0.000     0.000  1.0000  0.0000  0.0000
    25 C(13)  Bbb     0.0000     0.000     0.000     0.000  0.0000  1.0000  0.0000
              Bcc     0.0000     0.000     0.000     0.000  0.0000  0.0000  1.0000
 
              Baa     0.0000     0.000     0.000     0.000  1.0000  0.0000  0.0000
    26 C(13)  Bbb     0.0000     0.000     0.000     0.000  0.0000  1.0000  0.0000
              Bcc     0.0000     0.000     0.000     0.000  0.0000  0.0000  1.0000
 
              Baa     0.0000     0.000     0.000     0.000  1.0000  0.0000  0.0000
    27 C(13)  Bbb     0.0000     0.000     0.000     0.000  0.0000  1.0000  0.0000
              Bcc     0.0000     0.000     0.000     0.000  0.0000  0.0000  1.0000
 
              Baa     0.0000     0.000     0.000     0.000  1.0000  0.0000  0.0000
    28 C(13)  Bbb     0.0000     0.000     0.000     0.000  0.0000  1.0000  0.0000
              Bcc     0.0000     0.000     0.000     0.000  0.0000  0.0000  1.0000
 
              Baa     0.0000     0.000     0.000     0.000  1.0000  0.0000  0.0000
    29 O(17)  Bbb     0.0000     0.000     0.000     0.000  0.0000  1.0000  0.0000
              Bcc     0.0000     0.000     0.000     0.000  0.0000  0.0000  1.0000
 
              Baa     0.0000     0.000     0.000     0.000  1.0000  0.0000  0.0000
    30 N(14)  Bbb     0.0000     0.000     0.000     0.000  0.0000  1.0000  0.0000
              Bcc     0.0000     0.000     0.000     0.000  0.0000  0.0000  1.0000
 
              Baa     0.0000     0.000     0.000     0.000  1.0000  0.0000  0.0000
    31 N(14)  Bbb     0.0000     0.000     0.000     0.000  0.0000  1.0000  0.0000
              Bcc     0.0000     0.000     0.000     0.000  0.0000  0.0000  1.0000
 
              Baa     0.0000     0.000     0.000     0.000  1.0000  0.0000  0.0000
    32 C(13)  Bbb     0.0000     0.000     0.000     0.000  0.0000  1.0000  0.0000
              Bcc     0.0000     0.000     0.000     0.000  0.0000  0.0000  1.0000
 
              Baa     0.0000     0.000     0.000     0.000  1.0000  0.0000  0.0000
    33 C(13)  Bbb     0.0000     0.000     0.000     0.000  0.0000  1.0000  0.0000
              Bcc     0.0000     0.000     0.000     0.000  0.0000  0.0000  1.0000
 
              Baa     0.0000     0.000     0.000     0.000  1.0000  0.0000  0.0000
    34 C(13)  Bbb     0.0000     0.000     0.000     0.000  0.0000  1.0000  0.0000
              Bcc     0.0000     0.000     0.000     0.000  0.0000  0.0000  1.0000
 
              Baa     0.0000     0.000     0.000     0.000  1.0000  0.0000  0.0000
    35 C(13)  Bbb     0.0000     0.000     0.000     0.000  0.0000  1.0000  0.0000
              Bcc     0.0000     0.000     0.000     0.000  0.0000  0.0000  1.0000
 
              Baa     0.0000     0.000     0.000     0.000  1.0000  0.0000  0.0000
    36 C(13)  Bbb     0.0000     0.000     0.000     0.000  0.0000  1.0000  0.0000
              Bcc     0.0000     0.000     0.000     0.000  0.0000  0.0000  1.0000
 
              Baa     0.0000     0.000     0.000     0.000  1.0000  0.0000  0.0000
    37 C(13)  Bbb     0.0000     0.000     0.000     0.000  0.0000  1.0000  0.0000
              Bcc     0.0000     0.000     0.000     0.000  0.0000  0.0000  1.0000
 
              Baa     0.0000     0.000     0.000     0.000  1.0000  0.0000  0.0000
    38 C(13)  Bbb     0.0000     0.000     0.000     0.000  0.0000  1.0000  0.0000
              Bcc     0.0000     0.000     0.000     0.000  0.0000  0.0000  1.0000
 
              Baa     0.0000     0.000     0.000     0.000  1.0000  0.0000  0.0000
    39 O(17)  Bbb     0.0000     0.000     0.000     0.000  0.0000  1.0000  0.0000
              Bcc     0.0000     0.000     0.000     0.000  0.0000  0.0000  1.0000
 
              Baa     0.0000     0.000     0.000     0.000  1.0000  0.0000  0.0000
    40 H(1)   Bbb     0.0000     0.000     0.000     0.000  0.0000  1.0000  0.0000
              Bcc     0.0000     0.000     0.000     0.000  0.0000  0.0000  1.0000
 
              Baa     0.0000     0.000     0.000     0.000  1.0000  0.0000  0.0000
    41 H(1)   Bbb     0.0000     0.000     0.000     0.000  0.0000  1.0000  0.0000
              Bcc     0.0000     0.000     0.000     0.000  0.0000  0.0000  1.0000
 
              Baa     0.0000     0.000     0.000     0.000  1.0000  0.0000  0.0000
    42 H(1)   Bbb     0.0000     0.000     0.000     0.000  0.0000  1.0000  0.0000
              Bcc     0.0000     0.000     0.000     0.000  0.0000  0.0000  1.0000
 
              Baa     0.0000     0.000     0.000     0.000  1.0000  0.0000  0.0000
    43 H(1)   Bbb     0.0000     0.000     0.000     0.000  0.0000  1.0000  0.0000
              Bcc     0.0000     0.000     0.000     0.000  0.0000  0.0000  1.0000
 
              Baa     0.0000     0.000     0.000     0.000  1.0000  0.0000  0.0000
    44 H(1)   Bbb     0.0000     0.000     0.000     0.000  0.0000  1.0000  0.0000
              Bcc     0.0000     0.000     0.000     0.000  0.0000  0.0000  1.0000
 
              Baa     0.0000     0.000     0.000     0.000  1.0000  0.0000  0.0000
    45 H(1)   Bbb     0.0000     0.000     0.000     0.000  0.0000  1.0000  0.0000
              Bcc     0.0000     0.000     0.000     0.000  0.0000  0.0000  1.0000
 
              Baa     0.0000     0.000     0.000     0.000  1.0000  0.0000  0.0000
    46 H(1)   Bbb     0.0000     0.000     0.000     0.000  0.0000  1.0000  0.0000
              Bcc     0.0000     0.000     0.000     0.000  0.0000  0.0000  1.0000
 
              Baa     0.0000     0.000     0.000     0.000  1.0000  0.0000  0.0000
    47 H(1)   Bbb     0.0000     0.000     0.000     0.000  0.0000  1.0000  0.0000
              Bcc     0.0000     0.000     0.000     0.000  0.0000  0.0000  1.0000
 
              Baa     0.0000     0.000     0.000     0.000  1.0000  0.0000  0.0000
    48 H(1)   Bbb     0.0000     0.000     0.000     0.000  0.0000  1.0000  0.0000
              Bcc     0.0000     0.000     0.000     0.000  0.0000  0.0000  1.0000
 
              Baa     0.0000     0.000     0.000     0.000  1.0000  0.0000  0.0000
    49 H(1)   Bbb     0.0000     0.000     0.000     0.000  0.0000  1.0000  0.0000
              Bcc     0.0000     0.000     0.000     0.000  0.0000  0.0000  1.0000
 
              Baa     0.0000     0.000     0.000     0.000  1.0000  0.0000  0.0000
    50 H(1)   Bbb     0.0000     0.000     0.000     0.000  0.0000  1.0000  0.0000
              Bcc     0.0000     0.000     0.000     0.000  0.0000  0.0000  1.0000
 
              Baa     0.0000     0.000     0.000     0.000  1.0000  0.0000  0.0000
    51 H(1)   Bbb     0.0000     0.000     0.000     0.000  0.0000  1.0000  0.0000
              Bcc     0.0000     0.000     0.000     0.000  0.0000  0.0000  1.0000
 
              Baa     0.0000     0.000     0.000     0.000  1.0000  0.0000  0.0000
    52 H(1)   Bbb     0.0000     0.000     0.000     0.000  0.0000  1.0000  0.0000
              Bcc     0.0000     0.000     0.000     0.000  0.0000  0.0000  1.0000
 
              Baa     0.0000     0.000     0.000     0.000  1.0000  0.0000  0.0000
    53 H(1)   Bbb     0.0000     0.000     0.000     0.000  0.0000  1.0000  0.0000
              Bcc     0.0000     0.000     0.000     0.000  0.0000  0.0000  1.0000
 
              Baa     0.0000     0.000     0.000     0.000  1.0000  0.0000  0.0000
    54 H(1)   Bbb     0.0000     0.000     0.000     0.000  0.0000  1.0000  0.0000
              Bcc     0.0000     0.000     0.000     0.000  0.0000  0.0000  1.0000
 
              Baa     0.0000     0.000     0.000     0.000  1.0000  0.0000  0.0000
    55 H(1)   Bbb     0.0000     0.000     0.000     0.000  0.0000  1.0000  0.0000
              Bcc     0.0000     0.000     0.000     0.000  0.0000  0.0000  1.0000
 
              Baa     0.0000     0.000     0.000     0.000  1.0000  0.0000  0.0000
    56 H(1)   Bbb     0.0000     0.000     0.000     0.000  0.0000  1.0000  0.0000
              Bcc     0.0000     0.000     0.000     0.000  0.0000  0.0000  1.0000
 
              Baa     0.0000     0.000     0.000     0.000  1.0000  0.0000  0.0000
    57 H(1)   Bbb     0.0000     0.000     0.000     0.000  0.0000  1.0000  0.0000
              Bcc     0.0000     0.000     0.000     0.000  0.0000  0.0000  1.0000
 
              Baa     0.0000     0.000     0.000     0.000  1.0000  0.0000  0.0000
    58 H(1)   Bbb     0.0000     0.000     0.000     0.000  0.0000  1.0000  0.0000
              Bcc     0.0000     0.000     0.000     0.000  0.0000  0.0000  1.0000
 
              Baa     0.0000     0.000     0.000     0.000  1.0000  0.0000  0.0000
    59 H(1)   Bbb     0.0000     0.000     0.000     0.000  0.0000  1.0000  0.0000
              Bcc     0.0000     0.000     0.000     0.000  0.0000  0.0000  1.0000
 
              Baa     0.0000     0.000     0.000     0.000  1.0000  0.0000  0.0000
    60 H(1)   Bbb     0.0000     0.000     0.000     0.000  0.0000  1.0000  0.0000
              Bcc     0.0000     0.000     0.000     0.000  0.0000  0.0000  1.0000
 
              Baa     0.0000     0.000     0.000     0.000  1.0000  0.0000  0.0000
    61 H(1)   Bbb     0.0000     0.000     0.000     0.000  0.0000  1.0000  0.0000
              Bcc     0.0000     0.000     0.000     0.000  0.0000  0.0000  1.0000
 
              Baa     0.0000     0.000     0.000     0.000  1.0000  0.0000  0.0000
    62 H(1)   Bbb     0.0000     0.000     0.000     0.000  0.0000  1.0000  0.0000
              Bcc     0.0000     0.000     0.000     0.000  0.0000  0.0000  1.0000
 
              Baa     0.0000     0.000     0.000     0.000  1.0000  0.0000  0.0000
    63 H(1)   Bbb     0.0000     0.000     0.000     0.000  0.0000  1.0000  0.0000
              Bcc     0.0000     0.000     0.000     0.000  0.0000  0.0000  1.0000
 
              Baa     0.0000     0.000     0.000     0.000  1.0000  0.0000  0.0000
    64 O(17)  Bbb     0.0000     0.000     0.000     0.000  0.0000  1.0000  0.0000
              Bcc     0.0000     0.000     0.000     0.000  0.0000  0.0000  1.0000
 
              Baa     0.0000     0.000     0.000     0.000  1.0000  0.0000  0.0000
    65 H(1)   Bbb     0.0000     0.000     0.000     0.000  0.0000  1.0000  0.0000
              Bcc     0.0000     0.000     0.000     0.000  0.0000  0.0000  1.0000
 
              Baa     0.0000     0.000     0.000     0.000  1.0000  0.0000  0.0000
    66 H(1)   Bbb     0.0000     0.000     0.000     0.000  0.0000  1.0000  0.0000
              Bcc     0.0000     0.000     0.000     0.000  0.0000  0.0000  1.0000
 

 ---------------------------------------------------------------------------------

 No NMR shielding tensors so no spin-rotation constants.
 Leave Link  601 at Thu Oct 13 22:43:20 2016, MaxMem= 1342177280 cpu:      26.0
 (Enter /opt/software/g09/linda-exe/l701.exel)
 Compute integral first derivatives.
 ... and contract with generalized density number  0.
   1 Symmetry operations used in ECPInt.
 ECPInt:  NShTT=   28441 NPrTT=  163533 LenC2=   16061 LenP2D=   49407.
 LDataN:  DoStor=T MaxTD1= 5 Len=  102
 D1PCM: PCM CHGder 1st derivatives, ID1Alg=3 FixD1E=F DoIter=F DoCFld=F I1PDM=0.
 GePol: Maximum number of non-zero 1st derivatives   =     197
 Leave Link  701 at Thu Oct 13 22:43:31 2016, MaxMem= 1342177280 cpu:     200.8
 (Enter /opt/software/g09/l702.exe)
 L702 exits ... SP integral derivatives will be done elsewhere.
 Leave Link  702 at Thu Oct 13 22:43:31 2016, MaxMem= 1342177280 cpu:       0.3
 (Enter /opt/software/g09/linda-exe/l703.exel)
 Compute integral first derivatives, UseDBF=F ICtDFT=           0.
 Integral derivatives from FoFDir, PRISM(SPDF).
 Calling FoFJK, ICntrl=      2127 FMM=T ISym2X=0 I1Cent= 0 IOpClX= 1 NMat=1 NMatS=1 NMatT=0.
 FoFCou: FMM=T IPFlag=           0 FMFlag=      100000 FMFlg1=        2001
         NFxFlg=           0 DoJE=F BraDBF=F KetDBF=F FulRan=T
         Omega=  0.000000  0.000000  1.000000  0.000000  0.000000 ICntrl=    2127 IOpCl=  1
         NMat0=    1 NMatS0=    1 NMatT0=    0 NMatD0=    1 NMtDS0=    0 NMtDT0=    0
         I1Cent=           0 NGrid=           0.
 Symmetry not used in FoFCou.
 FMM levels:  10  Number of levels for PrismC:   9
 Leave Link  703 at Thu Oct 13 22:43:54 2016, MaxMem= 1342177280 cpu:     424.9
 (Enter /opt/software/g09/l716.exe)
 Dipole        =-4.82377373D-02 2.63567332D+00 1.17870532D+00
 ***** Axes restored to original set *****
 -------------------------------------------------------------------
 Center     Atomic                   Forces (Hartrees/Bohr)
 Number     Number              X              Y              Z
 -------------------------------------------------------------------
      1        8          -0.003376633    0.001722419    0.004764661
      2        6           0.006315795    0.003686783   -0.001954598
      3        6           0.013990106   -0.000890053    0.010112281
      4        6           0.001264232    0.000989450    0.000311279
      5        6           0.008518492   -0.001083796    0.003473413
      6        8           0.001137314    0.000170414   -0.003250595
      7        6          -0.002924840    0.005861530    0.013422346
      8        6          -0.006049489   -0.050443575    0.067032188
      9        8           0.020088836    0.010872752    0.049274303
     10        8          -0.001518937   -0.004394405   -0.007798814
     11        7           0.002441686   -0.003140825   -0.006309089
     12        7           0.008830685    0.003168173   -0.035942065
     13        7          -0.001119918   -0.002315615    0.029288734
     14        6          -0.007950439   -0.001681572    0.013880960
     15        6          -0.002801269   -0.000335189    0.003286306
     16        6           0.008596766   -0.000206463    0.005681336
     17        6          -0.000340204   -0.000047625    0.000602565
     18        6           0.000659937   -0.000005349   -0.000033932
     19        6          -0.001577487   -0.000607644    0.004713491
     20        6          -0.008966925   -0.004418586    0.037347301
     21        7           0.003777613   -0.000624860    0.002261217
     22        6          -0.004477635    0.000995589    0.000255558
     23        6           0.001455189   -0.000406430   -0.000474910
     24        6          -0.000227408    0.000147769    0.000087429
     25        6           0.001571199   -0.000335255    0.001387066
     26        6           0.000587075   -0.000146878    0.000356096
     27        6          -0.000981779    0.000169206   -0.000603396
     28        6          -0.002173224    0.000306708   -0.000615322
     29        8          -0.000458328   -0.000389570   -0.000121304
     30        7           0.028346975   -0.029045607    0.012104250
     31        7          -0.018336698    0.003523390   -0.021523139
     32        6          -0.040506222    0.005277428    0.005041833
     33        6           0.004570259   -0.005359092   -0.009472560
     34        6          -0.000060602    0.000482262    0.001919338
     35        6          -0.000004074    0.000557134    0.000951294
     36        6          -0.000499919   -0.000167672   -0.000410399
     37        6           0.000951424   -0.000599268   -0.002416466
     38        6          -0.005141328    0.001094888    0.002570388
     39        8          -0.000131181   -0.001349960   -0.004371202
     40        1           0.003651517    0.002002924   -0.002593279
     41        1          -0.000560190   -0.000179176   -0.000118712
     42        1          -0.000474231    0.000066030   -0.000521422
     43        1          -0.001104204    0.000702133   -0.000111326
     44        1          -0.002773467    0.000783595   -0.000344075
     45        1          -0.000502640    0.001821550    0.000203101
     46        1          -0.011672910    0.000279570   -0.003727764
     47        1          -0.003415789    0.000429047   -0.005729824
     48        1          -0.000336605   -0.000042987    0.000076986
     49        1          -0.000269288   -0.000038951    0.000253367
     50        1          -0.000637453    0.000082660   -0.001012406
     51        1           0.001059057    0.000209507    0.000505067
     52        1          -0.000385786    0.000048159   -0.000420880
     53        1           0.000150163   -0.000028109   -0.000110433
     54        1           0.000001552    0.000042331   -0.000139166
     55        1           0.000124811    0.000078861    0.000098639
     56        1           0.001191900    0.000217753    0.001199658
     57        1           0.018381977    0.058645436   -0.092927658
     58        1          -0.011710755   -0.003235430   -0.019715996
     59        1           0.000266865   -0.000217751   -0.000474599
     60        1           0.000055679   -0.000027758   -0.000171019
     61        1           0.000159299   -0.000069723   -0.000033724
     62        1          -0.000927553   -0.000066690   -0.000270375
     63        1           0.001316070    0.001624844    0.004870615
     64        8           0.003652313    0.005102072   -0.046605751
     65        1           0.009702026    0.000183582    0.001506598
     66        1          -0.008421402    0.000555914   -0.008513463
 -------------------------------------------------------------------
 Cartesian Forces:  Max     0.092927658 RMS     0.013344691
 Leave Link  716 at Thu Oct 13 22:43:54 2016, MaxMem= 1342177280 cpu:       1.2
 (Enter /opt/software/g09/l103.exe)

 GradGradGradGradGradGradGradGradGradGradGradGradGradGradGradGradGradGrad
 Berny optimization.
 Internal  Forces:  Max     0.088135975 RMS     0.008390801
 Search for a local minimum.
 Step number   1 out of a maximum of  343
 All quantities printed in internal units (Hartrees-Bohrs-Radians)
 RMS Force = .83908D-02 SwitMx=.10000D-02 MixMth= 1
 Mixed Optimization -- RFO/linear search
 Second derivative matrix not updated -- first step.
 ITU=  0
     Eigenvalues ---    0.00230   0.00230   0.00424   0.00453   0.00615
     Eigenvalues ---    0.01078   0.01218   0.01236   0.01295   0.01309
     Eigenvalues ---    0.01326   0.01395   0.01618   0.01707   0.01736
     Eigenvalues ---    0.01742   0.01802   0.01858   0.01863   0.01887
     Eigenvalues ---    0.01920   0.01923   0.01937   0.01940   0.01990
     Eigenvalues ---    0.02003   0.02012   0.02014   0.02033   0.02088
     Eigenvalues ---    0.02093   0.02098   0.02099   0.02108   0.02116
     Eigenvalues ---    0.02118   0.02129   0.02130   0.02134   0.02147
     Eigenvalues ---    0.02159   0.02160   0.02163   0.02166   0.02166
     Eigenvalues ---    0.02184   0.02186   0.02188   0.02189   0.02213
     Eigenvalues ---    0.02262   0.02436   0.03137   0.03160   0.03217
     Eigenvalues ---    0.03425   0.03760   0.04064   0.04832   0.05141
     Eigenvalues ---    0.05791   0.06032   0.07171   0.07257   0.08540
     Eigenvalues ---    0.08693   0.09366   0.09584   0.11867   0.12355
     Eigenvalues ---    0.12860   0.15942   0.15999   0.16000   0.16000
     Eigenvalues ---    0.16000   0.16000   0.16000   0.16000   0.16000
     Eigenvalues ---    0.16000   0.16000   0.16000   0.16000   0.16000
     Eigenvalues ---    0.16000   0.16000   0.16000   0.16000   0.16134
     Eigenvalues ---    0.16210   0.16458   0.16652   0.16843   0.17578
     Eigenvalues ---    0.22000   0.22000   0.22000   0.22000   0.22000
     Eigenvalues ---    0.22001   0.22018   0.22025   0.22345   0.22485
     Eigenvalues ---    0.22485   0.22494   0.22820   0.23660   0.24196
     Eigenvalues ---    0.24321   0.24467   0.24468   0.24471   0.24998
     Eigenvalues ---    0.24998   0.24999   0.25000   0.25000   0.25000
     Eigenvalues ---    0.25000   0.25000   0.25000   0.25000   0.27113
     Eigenvalues ---    0.27346   0.27425   0.30016   0.30497   0.33793
     Eigenvalues ---    0.33855   0.33940   0.34122   0.34815   0.34969
     Eigenvalues ---    0.34974   0.35021   0.35056   0.35077   0.35153
     Eigenvalues ---    0.35221   0.35267   0.35288   0.35377   0.35379
     Eigenvalues ---    0.35391   0.35408   0.36415   0.36736   0.37100
     Eigenvalues ---    0.37230   0.37274   0.38929   0.40648   0.40667
     Eigenvalues ---    0.40989   0.41150   0.41488   0.41539   0.41573
     Eigenvalues ---    0.43577   0.43734   0.44190   0.44325   0.44359
     Eigenvalues ---    0.44942   0.45508   0.45528   0.45693   0.46248
     Eigenvalues ---    0.46299   0.46474   0.46881   0.46953   0.47243
     Eigenvalues ---    0.48921   0.49076   0.49915   0.52433   0.52454
     Eigenvalues ---    0.52611   0.52822   0.53586   0.54024   0.55473
     Eigenvalues ---    0.56284   0.69830   0.70018   0.71628   0.86855
     Eigenvalues ---    0.91549   0.95482
 RFO step:  Lambda=-7.97526822D-02 EMin= 2.30000000D-03
 Linear search not attempted -- first point.
 Maximum step size (   0.300) exceeded in Quadratic search.
    -- Step size scaled by   0.571
 Iteration  1 RMS(Cart)=  0.09105215 RMS(Int)=  0.00105626
 Iteration  2 RMS(Cart)=  0.00351196 RMS(Int)=  0.00029484
 Iteration  3 RMS(Cart)=  0.00002091 RMS(Int)=  0.00029482
 Iteration  4 RMS(Cart)=  0.00000005 RMS(Int)=  0.00029482
 Variable       Old X    -DE/DX   Delta X   Delta X   Delta X     New X
                                 (Linear)    (Quad)   (Total)
    R1        2.69941  -0.00238   0.00000  -0.00283  -0.00285   2.69656
    R2        1.86583  -0.00011   0.00000   0.00012   0.00017   1.86600
    R3        2.93413  -0.00025   0.00000  -0.00041  -0.00041   2.93373
    R4        2.93646   0.00181   0.00000   0.00255   0.00250   2.93896
    R5        2.93591   0.00702   0.00000   0.01134   0.01134   2.94725
    R6        2.32227  -0.00298   0.00000  -0.00171  -0.00171   2.32056
    R7        2.57467  -0.00732   0.00000  -0.00691  -0.00691   2.56775
    R8        2.86506  -0.00080   0.00000  -0.00147  -0.00151   2.86355
    R9        2.07431  -0.00044   0.00000  -0.00060  -0.00060   2.07371
   R10        2.05717  -0.00049   0.00000  -0.00065  -0.00065   2.05652
   R11        2.87933   0.01189   0.00000   0.01785   0.01785   2.89718
   R12        2.05976  -0.00018   0.00000  -0.00024  -0.00024   2.05951
   R13        2.07124  -0.00196   0.00000  -0.00266  -0.00266   2.06859
   R14        2.34380   0.00843   0.00000   0.00509   0.00510   2.34890
   R15        2.57120  -0.00412   0.00000  -0.00387  -0.00387   2.56733
   R16        2.30425   0.03103   0.00000   0.01684   0.01689   2.32114
   R17        2.61833   0.02191   0.00000   0.01856   0.01781   2.63614
   R18        2.44422   0.08814   0.00000   0.19939   0.19903   2.64324
   R19        3.01104   0.04164   0.00000   0.13366   0.13386   3.14490
   R20        3.28306   0.00089   0.00000   0.00447   0.00452   3.28758
   R21        2.57318   0.00379   0.00000   0.00357   0.00357   2.57675
   R22        1.92927   0.00057   0.00000   0.00063   0.00063   1.92990
   R23        2.59951  -0.01233   0.00000  -0.01215  -0.01215   2.58736
   R24        1.91179   0.00782   0.00000   0.00831   0.00831   1.92010
   R25        2.43915  -0.01094   0.00000  -0.00802  -0.00802   2.43113
   R26        2.76737  -0.00066   0.00000  -0.00084  -0.00084   2.76653
   R27        2.05584   0.00667   0.00000   0.00885   0.00885   2.06469
   R28        2.66059   0.00142   0.00000   0.00156   0.00156   2.66215
   R29        2.67891  -0.00285   0.00000  -0.00333  -0.00333   2.67558
   R30        2.62818   0.00020   0.00000   0.00033   0.00033   2.62851
   R31        2.02201   0.01187   0.00000   0.01498   0.01498   2.03699
   R32        2.63743   0.00137   0.00000   0.00156   0.00156   2.63898
   R33        2.05067  -0.00020   0.00000  -0.00027  -0.00027   2.05041
   R34        2.63248   0.00034   0.00000   0.00034   0.00034   2.63282
   R35        2.05244  -0.00030   0.00000  -0.00039  -0.00039   2.05205
   R36        2.64608  -0.00333   0.00000  -0.00367  -0.00367   2.64241
   R37        2.05725  -0.00120   0.00000  -0.00159  -0.00159   2.05566
   R38        2.70231  -0.04710   0.00000  -0.05488  -0.05488   2.64742
   R39        2.42773   0.00303   0.00000   0.00217   0.00217   2.42990
   R40        2.75696   0.00058   0.00000   0.00074   0.00074   2.75770
   R41        2.07681  -0.00113   0.00000  -0.00154  -0.00154   2.07527
   R42        2.67901   0.00203   0.00000   0.00232   0.00232   2.68132
   R43        2.65966   0.00143   0.00000   0.00159   0.00159   2.66125
   R44        2.64491   0.00042   0.00000   0.00045   0.00045   2.64536
   R45        2.56411   0.00029   0.00000   0.00027   0.00027   2.56437
   R46        2.63215   0.00030   0.00000   0.00028   0.00028   2.63243
   R47        2.05641  -0.00056   0.00000  -0.00075  -0.00075   2.05566
   R48        2.63862   0.00141   0.00000   0.00145   0.00145   2.64007
   R49        2.05210  -0.00013   0.00000  -0.00017  -0.00017   2.05193
   R50        2.62688  -0.00010   0.00000  -0.00011  -0.00011   2.62677
   R51        2.05018  -0.00004   0.00000  -0.00006  -0.00006   2.05012
   R52        2.05427  -0.00015   0.00000  -0.00020  -0.00020   2.05407
   R53        1.82709   0.00164   0.00000   0.00151   0.00151   1.82861
   R54        2.56866   0.03990   0.00000   0.03851   0.03832   2.60698
   R55        1.92566   0.02259   0.00000   0.02302   0.02435   1.95001
   R56        2.43657   0.01152   0.00000   0.00876   0.00870   2.44528
   R57        3.33338  -0.00102   0.00000  -0.00409  -0.00406   3.32932
   R58        2.74479   0.00303   0.00000   0.00379   0.00376   2.74855
   R59        2.07388   0.00368   0.00000   0.00392   0.00405   2.07792
   R60        2.66053   0.00066   0.00000   0.00069   0.00069   2.66122
   R61        2.68971   0.00001   0.00000   0.00001  -0.00003   2.68967
   R62        2.62244   0.00066   0.00000   0.00067   0.00067   2.62312
   R63        2.05550  -0.00045   0.00000  -0.00060  -0.00060   2.05490
   R64        2.64929   0.00168   0.00000   0.00183   0.00184   2.65113
   R65        2.05064  -0.00015   0.00000  -0.00020  -0.00020   2.05044
   R66        2.62628   0.00063   0.00000   0.00068   0.00069   2.62697
   R67        2.05317  -0.00013   0.00000  -0.00018  -0.00018   2.05300
   R68        2.65177   0.00036   0.00000   0.00039   0.00039   2.65215
   R69        2.05045   0.00043   0.00000   0.00056   0.00056   2.05101
   R70        2.53927   0.00076   0.00000   0.00068   0.00067   2.53994
   R71        1.86910   0.00271   0.00000   0.00266   0.00269   1.87180
   R72        1.81414   0.00824   0.00000   0.00741   0.00741   1.82154
    A1        1.84780   0.00468   0.00000   0.01056   0.01050   1.85830
    A2        1.91493   0.00071   0.00000   0.00158   0.00161   1.91654
    A3        1.94458  -0.00175   0.00000  -0.00378  -0.00386   1.94072
    A4        1.91981   0.00239   0.00000   0.00828   0.00830   1.92811
    A5        1.85321  -0.00024   0.00000  -0.00295  -0.00293   1.85028
    A6        1.85788  -0.00271   0.00000  -0.00756  -0.00757   1.85031
    A7        1.96976   0.00146   0.00000   0.00379   0.00379   1.97355
    A8        2.10154   0.00141   0.00000   0.00244   0.00244   2.10398
    A9        1.97708   0.00117   0.00000   0.00203   0.00203   1.97910
   A10        2.20450  -0.00258   0.00000  -0.00447  -0.00447   2.20003
   A11        1.96671   0.00141   0.00000   0.00137   0.00123   1.96794
   A12        1.88487  -0.00162   0.00000  -0.00405  -0.00402   1.88085
   A13        1.92735   0.00124   0.00000   0.00451   0.00456   1.93191
   A14        1.85076   0.00050   0.00000   0.00154   0.00156   1.85233
   A15        1.95167  -0.00191   0.00000  -0.00409  -0.00403   1.94764
   A16        1.87743   0.00028   0.00000   0.00048   0.00047   1.87790
   A17        1.99718   0.01768   0.00000   0.03446   0.03448   2.03167
   A18        1.90787  -0.00830   0.00000  -0.01982  -0.01969   1.88817
   A19        1.86982  -0.00110   0.00000   0.00501   0.00501   1.87483
   A20        1.88260  -0.00444   0.00000  -0.00980  -0.00967   1.87293
   A21        1.91308  -0.00750   0.00000  -0.01429  -0.01457   1.89851
   A22        1.89103   0.00319   0.00000   0.00330   0.00320   1.89423
   A23        2.12368  -0.00231   0.00000  -0.00467  -0.00476   2.11892
   A24        2.07109   0.00094   0.00000   0.00200   0.00204   2.07313
   A25        2.08799   0.00139   0.00000   0.00278   0.00282   2.09081
   A26        2.15947  -0.01566   0.00000  -0.02883  -0.02852   2.13095
   A27        1.97258   0.00246   0.00000   0.00295   0.00356   1.97614
   A28        1.56966   0.01227   0.00000   0.02843   0.02813   1.59779
   A29        2.15109   0.01319   0.00000   0.02585   0.02494   2.17603
   A30        2.27841   0.00042   0.00000   0.00157   0.00296   2.28137
   A31        2.13525   0.00041   0.00000   0.00091   0.00090   2.13616
   A32        2.02071   0.00075   0.00000   0.00206   0.00205   2.02276
   A33        2.11863  -0.00100   0.00000  -0.00211  -0.00212   2.11651
   A34        2.29387  -0.03452   0.00000  -0.06569  -0.06569   2.22817
   A35        2.01037   0.00824   0.00000   0.01139   0.01139   2.02176
   A36        1.97876   0.02628   0.00000   0.05431   0.05431   2.03307
   A37        2.08408  -0.03072   0.00000  -0.05314  -0.05314   2.03094
   A38        2.14264   0.00788   0.00000   0.01500   0.01500   2.15764
   A39        2.12368  -0.00434   0.00000  -0.00845  -0.00845   2.11524
   A40        2.01686  -0.00354   0.00000  -0.00656  -0.00656   2.01030
   A41        2.03334  -0.00129   0.00000  -0.00217  -0.00217   2.03117
   A42        2.19902   0.00251   0.00000   0.00441   0.00440   2.20342
   A43        2.05083  -0.00121   0.00000  -0.00224  -0.00223   2.04859
   A44        2.13895  -0.00107   0.00000  -0.00171  -0.00171   2.13724
   A45        2.07212  -0.00115   0.00000  -0.00316  -0.00316   2.06896
   A46        2.07212   0.00222   0.00000   0.00487   0.00487   2.07699
   A47        2.07755   0.00043   0.00000   0.00136   0.00136   2.07891
   A48        2.10011  -0.00051   0.00000  -0.00137  -0.00137   2.09874
   A49        2.10552   0.00007   0.00000   0.00001   0.00001   2.10553
   A50        2.09344  -0.00021   0.00000  -0.00013  -0.00013   2.09331
   A51        2.10354   0.00033   0.00000   0.00060   0.00061   2.10415
   A52        2.08620  -0.00012   0.00000  -0.00048  -0.00048   2.08573
   A53        2.11293  -0.00174   0.00000  -0.00349  -0.00349   2.10944
   A54        2.09467   0.00076   0.00000   0.00150   0.00150   2.09617
   A55        2.07559   0.00097   0.00000   0.00199   0.00199   2.07758
   A56        2.09267   0.00380   0.00000   0.00621   0.00621   2.09888
   A57        2.09526  -0.00336   0.00000  -0.00564  -0.00564   2.08962
   A58        2.09526  -0.00044   0.00000  -0.00057  -0.00057   2.09468
   A59        2.03562  -0.00364   0.00000  -0.00630  -0.00630   2.02932
   A60        2.17340   0.00222   0.00000   0.00423   0.00423   2.17764
   A61        2.10364  -0.00111   0.00000  -0.00211  -0.00211   2.10153
   A62        2.00613  -0.00111   0.00000  -0.00211  -0.00211   2.00401
   A63        2.17739   0.00303   0.00000   0.00518   0.00518   2.18257
   A64        2.04868  -0.00297   0.00000  -0.00520  -0.00520   2.04347
   A65        2.05708  -0.00005   0.00000   0.00003   0.00003   2.05711
   A66        2.09047   0.00005   0.00000   0.00016   0.00016   2.09063
   A67        2.07389   0.00161   0.00000   0.00275   0.00275   2.07664
   A68        2.11882  -0.00166   0.00000  -0.00291  -0.00291   2.11591
   A69        2.11054  -0.00034   0.00000  -0.00069  -0.00069   2.10986
   A70        2.07658   0.00007   0.00000   0.00010   0.00010   2.07669
   A71        2.09606   0.00027   0.00000   0.00058   0.00058   2.09664
   A72        2.09647   0.00052   0.00000   0.00087   0.00087   2.09734
   A73        2.08519  -0.00040   0.00000  -0.00078  -0.00078   2.08442
   A74        2.10152  -0.00012   0.00000  -0.00009  -0.00009   2.10143
   A75        2.07814   0.00009   0.00000   0.00010   0.00010   2.07823
   A76        2.10534   0.00008   0.00000   0.00026   0.00026   2.10560
   A77        2.09971  -0.00018   0.00000  -0.00036  -0.00036   2.09935
   A78        2.13368  -0.00027   0.00000  -0.00047  -0.00047   2.13320
   A79        2.06230   0.00016   0.00000   0.00029   0.00029   2.06259
   A80        2.08720   0.00012   0.00000   0.00019   0.00019   2.08739
   A81        1.90315   0.00003   0.00000   0.00007   0.00007   1.90322
   A82        2.08312   0.00516   0.00000   0.02617   0.02640   2.10952
   A83        2.08754  -0.01967   0.00000  -0.03992  -0.04233   2.04521
   A84        2.08097  -0.00321   0.00000   0.00354   0.00279   2.08376
   A85        2.11045   0.00453   0.00000   0.00728   0.00730   2.11775
   A86        2.11971  -0.02708   0.00000  -0.06005  -0.06024   2.05947
   A87        2.05302   0.02253   0.00000   0.05271   0.05282   2.10583
   A88        2.08780  -0.00218   0.00000  -0.00382  -0.00375   2.08405
   A89        2.12038   0.00328   0.00000   0.00582   0.00573   2.12611
   A90        2.07498  -0.00109   0.00000  -0.00199  -0.00197   2.07301
   A91        2.12023  -0.00027   0.00000  -0.00053  -0.00055   2.11968
   A92        2.06758  -0.00024   0.00000  -0.00063  -0.00062   2.06696
   A93        2.09538   0.00051   0.00000   0.00116   0.00117   2.09655
   A94        2.07841   0.00046   0.00000   0.00097   0.00097   2.07938
   A95        2.10121  -0.00014   0.00000  -0.00026  -0.00026   2.10095
   A96        2.10357  -0.00033   0.00000  -0.00071  -0.00071   2.10286
   A97        2.10824   0.00026   0.00000   0.00065   0.00066   2.10890
   A98        2.09219  -0.00002   0.00000  -0.00008  -0.00008   2.09211
   A99        2.08275  -0.00023   0.00000  -0.00057  -0.00057   2.08218
   A100       2.10410  -0.00194   0.00000  -0.00355  -0.00357   2.10053
   A101       2.12100   0.00008   0.00000  -0.00035  -0.00034   2.12066
   A102       2.05809   0.00186   0.00000   0.00390   0.00391   2.06199
   A103       2.08041   0.00259   0.00000   0.00445   0.00446   2.08487
   A104       2.14308  -0.00474   0.00000  -0.00811  -0.00818   2.13491
   A105       2.05969   0.00215   0.00000   0.00366   0.00372   2.06341
   A106       1.89904  -0.00627   0.00000  -0.01485  -0.01489   1.88415
   A107       1.91114  -0.00967   0.00000  -0.02302  -0.02302   1.88812
    D1       -2.48162   0.00204   0.00000   0.01411   0.01411  -2.46751
    D2       -0.43445   0.00113   0.00000   0.00917   0.00917  -0.42528
    D3        1.76343   0.00352   0.00000   0.01752   0.01750   1.78092
    D4       -3.04892  -0.00111   0.00000  -0.00348  -0.00351  -3.05243
    D5        0.10415  -0.00109   0.00000  -0.00337  -0.00339   0.10075
    D6        1.13074   0.00073   0.00000   0.00191   0.00195   1.13269
    D7       -1.99937   0.00076   0.00000   0.00202   0.00206  -1.99732
    D8       -0.97223   0.00055   0.00000   0.00289   0.00287  -0.96936
    D9        2.18083   0.00058   0.00000   0.00300   0.00299   2.18382
   D10        0.85909   0.00221   0.00000   0.01025   0.01020   0.86929
   D11       -1.17921   0.00181   0.00000   0.01013   0.01012  -1.16910
   D12        3.05555   0.00173   0.00000   0.00941   0.00938   3.06493
   D13        2.94332   0.00195   0.00000   0.00824   0.00823   2.95155
   D14        0.90501   0.00155   0.00000   0.00813   0.00814   0.91315
   D15       -1.14340   0.00147   0.00000   0.00741   0.00740  -1.13600
   D16       -1.31092  -0.00070   0.00000  -0.00069  -0.00071  -1.31163
   D17        2.93396  -0.00110   0.00000  -0.00080  -0.00079   2.93317
   D18        0.88554  -0.00118   0.00000  -0.00152  -0.00153   0.88401
   D19       -1.08768   0.00048   0.00000   0.00090   0.00077  -1.08691
   D20        3.08227   0.00031   0.00000   0.00474   0.00478   3.08706
   D21        1.03677   0.00151   0.00000   0.00850   0.00860   1.04537
   D22        3.12201  -0.00008   0.00000  -0.00106  -0.00119   3.12082
   D23        1.00878  -0.00025   0.00000   0.00278   0.00282   1.01160
   D24       -1.03672   0.00095   0.00000   0.00654   0.00664  -1.03008
   D25        1.09585   0.00110   0.00000   0.00512   0.00498   1.10083
   D26       -1.01739   0.00093   0.00000   0.00896   0.00899  -1.00840
   D27       -3.06289   0.00213   0.00000   0.01273   0.01281  -3.05008
   D28       -3.13630  -0.00018   0.00000  -0.00109  -0.00109  -3.13739
   D29       -0.01717   0.00004   0.00000   0.00023   0.00023  -0.01694
   D30        0.01757  -0.00018   0.00000  -0.00102  -0.00103   0.01655
   D31        3.13670   0.00004   0.00000   0.00029   0.00029   3.13699
   D32       -0.75262   0.00256   0.00000   0.01475   0.01476  -0.73786
   D33        2.42050   0.00191   0.00000   0.01066   0.01067   2.43117
   D34        1.30585   0.00168   0.00000   0.01155   0.01154   1.31739
   D35       -1.80421   0.00103   0.00000   0.00745   0.00744  -1.79677
   D36       -2.93589   0.00131   0.00000   0.01089   0.01091  -2.92499
   D37        0.23723   0.00066   0.00000   0.00680   0.00681   0.24404
   D38       -1.84092   0.00452   0.00000   0.02268   0.02239  -1.81852
   D39        1.31025   0.00501   0.00000   0.02550   0.02438   1.33463
   D40        0.62586   0.00519   0.00000   0.03132   0.03259   0.65844
   D41        0.28620   0.00231   0.00000   0.01287   0.01260   0.29880
   D42       -2.84582   0.00280   0.00000   0.01569   0.01458  -2.83124
   D43        2.75297   0.00298   0.00000   0.02151   0.02279   2.77576
   D44        2.34170  -0.00055   0.00000   0.00332   0.00316   2.34486
   D45       -0.79033  -0.00006   0.00000   0.00614   0.00515  -0.78518
   D46       -1.47472   0.00012   0.00000   0.01196   0.01335  -1.46136
   D47       -0.07049   0.00009   0.00000   0.00093   0.00094  -0.06955
   D48       -3.07321  -0.00108   0.00000  -0.00582  -0.00581  -3.07903
   D49        3.10197  -0.00048   0.00000  -0.00294  -0.00294   3.09903
   D50        0.09925  -0.00165   0.00000  -0.00969  -0.00970   0.08955
   D51       -3.04993  -0.00154   0.00000  -0.00975  -0.01070  -3.06063
   D52        0.10118  -0.00087   0.00000  -0.00661  -0.00832   0.09286
   D53       -3.03267  -0.00127   0.00000  -0.00711  -0.00710  -3.03978
   D54       -0.03762   0.00011   0.00000   0.00036   0.00035  -0.03727
   D55        3.14159  -0.00032   0.00000  -0.00162  -0.00162   3.13997
   D56        0.02214  -0.00037   0.00000  -0.00251  -0.00250   0.01964
   D57        3.13821   0.00016   0.00000   0.00090   0.00090   3.13911
   D58       -0.00146  -0.00004   0.00000  -0.00024  -0.00024  -0.00170
   D59       -3.13973  -0.00018   0.00000  -0.00105  -0.00106  -3.14079
   D60        0.00038  -0.00015   0.00000  -0.00090  -0.00090  -0.00052
   D61        0.00005   0.00001   0.00000   0.00002   0.00002   0.00006
   D62        3.14015   0.00003   0.00000   0.00017   0.00017   3.14033
   D63        3.14009   0.00006   0.00000   0.00032   0.00032   3.14041
   D64       -0.00150   0.00002   0.00000   0.00010   0.00010  -0.00140
   D65       -0.00014   0.00003   0.00000   0.00017   0.00017   0.00003
   D66        3.14145  -0.00001   0.00000  -0.00005  -0.00005   3.14140
   D67       -3.13985  -0.00004   0.00000  -0.00021  -0.00021  -3.14006
   D68        0.00174  -0.00012   0.00000  -0.00068  -0.00067   0.00106
   D69        0.00024  -0.00001   0.00000  -0.00005  -0.00005   0.00019
   D70       -3.14135  -0.00009   0.00000  -0.00052  -0.00052   3.14132
   D71       -0.00007  -0.00002   0.00000  -0.00011  -0.00011  -0.00017
   D72       -3.14113  -0.00003   0.00000  -0.00019  -0.00019  -3.14132
   D73        3.14153   0.00002   0.00000   0.00012   0.00012  -3.14154
   D74        0.00046   0.00001   0.00000   0.00003   0.00003   0.00049
   D75        0.00018  -0.00001   0.00000  -0.00008  -0.00008   0.00010
   D76       -3.14124   0.00000   0.00000   0.00001   0.00001  -3.14122
   D77        3.14125   0.00000   0.00000   0.00000   0.00000   3.14125
   D78       -0.00017   0.00002   0.00000   0.00010   0.00010  -0.00007
   D79       -0.00009   0.00003   0.00000   0.00020   0.00020   0.00011
   D80       -3.14149   0.00003   0.00000   0.00017   0.00017  -3.14132
   D81        3.14134   0.00002   0.00000   0.00010   0.00010   3.14144
   D82       -0.00007   0.00001   0.00000   0.00008   0.00008   0.00001
   D83       -0.00013  -0.00002   0.00000  -0.00013  -0.00013  -0.00026
   D84        3.14146   0.00006   0.00000   0.00034   0.00034  -3.14139
   D85        3.14128  -0.00002   0.00000  -0.00010  -0.00010   3.14117
   D86       -0.00032   0.00006   0.00000   0.00036   0.00036   0.00005
   D87        3.10326   0.00034   0.00000   0.00210   0.00210   3.10535
   D88       -0.03834   0.00026   0.00000   0.00163   0.00163  -0.03670
   D89        3.13820  -0.00022   0.00000  -0.00103  -0.00103   3.13717
   D90        0.00344  -0.00047   0.00000  -0.00247  -0.00247   0.00097
   D91       -0.02010  -0.00008   0.00000  -0.00048  -0.00048  -0.02058
   D92        3.13069  -0.00016   0.00000  -0.00089  -0.00089   3.12980
   D93        3.11499   0.00016   0.00000   0.00089   0.00089   3.11589
   D94       -0.01740   0.00008   0.00000   0.00048   0.00048  -0.01692
   D95       -3.13145  -0.00007   0.00000  -0.00045  -0.00045  -3.13189
   D96        0.01045  -0.00003   0.00000  -0.00020  -0.00020   0.01024
   D97        0.00090  -0.00001   0.00000  -0.00005  -0.00005   0.00085
   D98       -3.14039   0.00003   0.00000   0.00019   0.00019  -3.14020
   D99        3.13317   0.00009   0.00000   0.00046   0.00046   3.13363
   D100      -0.00452   0.00001   0.00000   0.00000   0.00000  -0.00452
   D101       0.00013   0.00001   0.00000   0.00004   0.00004   0.00018
   D102      -3.13756  -0.00008   0.00000  -0.00041  -0.00041  -3.13798
   D103      -0.00108   0.00001   0.00000   0.00007   0.00007  -0.00101
   D104       3.14005   0.00001   0.00000   0.00007   0.00007   3.14013
   D105       3.14020  -0.00003   0.00000  -0.00018  -0.00018   3.14003
   D106      -0.00185  -0.00003   0.00000  -0.00017  -0.00017  -0.00202
   D107      -3.10430  -0.00041   0.00000  -0.00231  -0.00231  -3.10661
   D108       0.03760  -0.00037   0.00000  -0.00207  -0.00207   0.03554
   D109       0.00020  -0.00001   0.00000  -0.00008  -0.00008   0.00012
   D110       3.14096   0.00002   0.00000   0.00010   0.00010   3.14105
   D111      -3.14092  -0.00001   0.00000  -0.00008  -0.00008  -3.14101
   D112      -0.00017   0.00002   0.00000   0.00009   0.00009  -0.00008
   D113       0.00083   0.00001   0.00000   0.00007   0.00007   0.00089
   D114       3.13996   0.00005   0.00000   0.00030   0.00030   3.14026
   D115      -3.13992  -0.00002   0.00000  -0.00011  -0.00011  -3.14003
   D116      -0.00079   0.00002   0.00000   0.00013   0.00013  -0.00066
   D117      -0.00100  -0.00001   0.00000  -0.00005  -0.00005  -0.00105
   D118       3.13665   0.00008   0.00000   0.00041   0.00041   3.13706
   D119      -3.14014  -0.00005   0.00000  -0.00029  -0.00029  -3.14042
   D120      -0.00250   0.00003   0.00000   0.00018   0.00018  -0.00232
   D121       0.01745   0.01461   0.00000   0.03340   0.03205   0.04951
   D122      -1.26850  -0.02316   0.00000  -0.08051  -0.07925  -1.34775
   D123      -3.14072   0.00121   0.00000   0.00737   0.00707  -3.13365
   D124      -0.00402  -0.00112   0.00000  -0.00588  -0.00562  -0.00965
   D125      -3.12830  -0.00132   0.00000  -0.00732  -0.00746  -3.13575
   D126       0.02089  -0.00150   0.00000  -0.00840  -0.00855   0.01234
   D127       0.01801   0.00106   0.00000   0.00574   0.00588   0.02390
   D128      -3.11598   0.00088   0.00000   0.00465   0.00479  -3.11119
   D129      -3.13614  -0.00019   0.00000  -0.00107  -0.00107  -3.13721
   D130       0.00524  -0.00015   0.00000  -0.00083  -0.00083   0.00441
   D131      -0.00195   0.00000   0.00000   0.00002   0.00002  -0.00192
   D132       3.13943   0.00005   0.00000   0.00027   0.00026   3.13970
   D133       3.13545   0.00014   0.00000   0.00087   0.00087   3.13632
   D134      -0.00339   0.00001   0.00000   0.00010   0.00011  -0.00328
   D135       0.00140  -0.00003   0.00000  -0.00020  -0.00020   0.00120
   D136      -3.13744  -0.00017   0.00000  -0.00097  -0.00097  -3.13841
   D137       0.00094   0.00005   0.00000   0.00030   0.00030   0.00124
   D138      -3.14083   0.00002   0.00000   0.00012   0.00012  -3.14071
   D139      -3.14044   0.00001   0.00000   0.00006   0.00006  -3.14039
   D140       0.00097  -0.00002   0.00000  -0.00013  -0.00013   0.00085
   D141       0.00064  -0.00008   0.00000  -0.00045  -0.00045   0.00019
   D142      -3.14112  -0.00004   0.00000  -0.00024  -0.00024  -3.14136
   D143      -3.14078  -0.00005   0.00000  -0.00026  -0.00026  -3.14104
   D144       0.00065  -0.00001   0.00000  -0.00005  -0.00005   0.00059
   D145      -0.00116   0.00005   0.00000   0.00027   0.00027  -0.00090
   D146       3.14128   0.00005   0.00000   0.00031   0.00031  -3.14159
   D147       3.14060   0.00001   0.00000   0.00006   0.00006   3.14066
   D148      -0.00014   0.00002   0.00000   0.00010   0.00010  -0.00004
   D149       0.00012   0.00001   0.00000   0.00006   0.00006   0.00018
   D150       3.13910   0.00013   0.00000   0.00077   0.00077   3.13987
   D151       3.14089   0.00000   0.00000   0.00002   0.00002   3.14091
   D152      -0.00332   0.00012   0.00000   0.00073   0.00073  -0.00259
   D153      -0.00801  -0.00002   0.00000  -0.00010  -0.00010  -0.00811
   D154       3.13630  -0.00015   0.00000  -0.00086  -0.00085   3.13544
         Item               Value     Threshold  Converged?
 Maximum Force            0.088136     0.000450     NO 
 RMS     Force            0.008391     0.000300     NO 
 Maximum Displacement     0.380212     0.001800     NO 
 RMS     Displacement     0.092174     0.001200     NO 
 Predicted change in Energy=-3.662667D-02
 GradGradGradGradGradGradGradGradGradGradGradGradGradGradGradGradGradGrad

 Leave Link  103 at Thu Oct 13 22:44:02 2016, MaxMem= 1342177280 cpu:     141.9
 (Enter /opt/software/g09/l202.exe)
 Stoichiometry    C27H26N6O7
 Framework group  C1[X(C27H26N6O7)]
 Deg. of freedom   192
 Full point group                 C1      NOp   1
 Largest Abelian subgroup         C1      NOp   1
 Largest concise Abelian subgroup C1      NOp   1
                         Standard orientation:                         
 ---------------------------------------------------------------------
 Center     Atomic      Atomic             Coordinates (Angstroms)
 Number     Number       Type             X           Y           Z
 ---------------------------------------------------------------------
      1          8           0       -1.307410   -1.521646    0.649007
      2          6           0       -1.095249   -0.312132   -0.077822
      3          6           0       -2.459994    0.286805   -0.512426
      4          6           0       -0.417038    0.767475    0.812803
      5          6           0       -0.311561   -0.597935   -1.395608
      6          8           0       -2.504598    1.281217   -1.231527
      7          6           0        0.807771    0.245458    1.536371
      8          6           0        1.099831   -1.175491   -1.237937
      9          8           0        2.106881   -0.491495   -1.401351
     10          8           0        0.817015   -0.879057    2.065894
     11          7           0        1.902572    1.044496    1.629488
     12          7           0       -3.528695   -0.385220   -0.009847
     13          7           0       -4.856060   -0.114213   -0.208083
     14          6           0       -5.692590   -0.898544    0.375118
     15          6           0       -7.145850   -0.753322    0.274170
     16          6           0       -7.919555   -1.697929    0.976789
     17          6           0       -9.310330   -1.677362    0.969545
     18          6           0       -9.971395   -0.686208    0.240992
     19          6           0       -9.237066    0.263969   -0.465418
     20          6           0       -7.838972    0.241422   -0.457073
     21          7           0        1.968232    2.266606    1.028304
     22          6           0        3.099804    2.873653    1.095025
     23          6           0        3.377321    4.183035    0.513572
     24          6           0        2.448340    4.959689   -0.226067
     25          6           0        2.836920    6.200176   -0.745512
     26          6           0        4.126820    6.686738   -0.545703
     27          6           0        5.055290    5.937075    0.180749
     28          6           0        4.672656    4.704377    0.696713
     29          8           0        1.193161    4.479758   -0.414914
     30          7           0        1.105916   -2.531789   -0.911741
     31          7           0        2.287930   -3.188967   -0.639481
     32          6           0        3.397758   -2.523648   -0.634070
     33          6           0        4.669196   -3.175528   -0.362076
     34          6           0        5.851733   -2.410815   -0.359465
     35          6           0        7.088278   -2.990157   -0.110226
     36          6           0        7.158457   -4.368274    0.142845
     37          6           0        6.009969   -5.151491    0.145793
     38          6           0        4.756188   -4.572641   -0.104534
     39          8           0        3.674259   -5.370046   -0.093310
     40          1           0       -0.643780   -1.529024    1.380166
     41          1           0       -1.132618    1.055414    1.593341
     42          1           0       -0.188983    1.658271    0.230747
     43          1           0       -0.219300    0.338031   -1.946266
     44          1           0       -0.912523   -1.293495   -1.989996
     45          1           0        2.721639    0.628594    2.075726
     46          1           0       -3.312382   -1.193437    0.566695
     47          1           0       -5.350502   -1.733372    0.991389
     48          1           0       -9.870903   -2.422754    1.524011
     49          1           0      -11.056400   -0.647917    0.219332
     50          1           0       -9.749268    1.037364   -1.033608
     51          1           0        3.949787    2.409732    1.613020
     52          1           0        2.114661    6.784190   -1.311724
     53          1           0        4.403070    7.651807   -0.959668
     54          1           0        6.062259    6.308058    0.339948
     55          1           0        5.389474    4.112093    1.259628
     56          1           0        0.694776    5.104846   -0.960110
     57          1           0        0.697608   -1.962697   -0.153958
     58          1           0        3.355914   -1.448052   -0.858659
     59          1           0        5.778958   -1.344289   -0.558662
     60          1           0        7.988370   -2.384223   -0.111665
     61          1           0        8.120068   -4.833958    0.339586
     62          1           0        6.051596   -6.218469    0.340222
     63          1           0        2.879564   -4.809068   -0.280062
     64          8           0       -7.118212    1.205724   -1.173526
     65          1           0       -7.748394    1.773758   -1.631073
     66          1           0       -7.411118   -2.463798    1.539699
 ---------------------------------------------------------------------
 Rotational constants (GHZ):      0.0913301      0.0389477      0.0285924
 Leave Link  202 at Thu Oct 13 22:44:02 2016, MaxMem= 1342177280 cpu:       0.9
 (Enter /opt/software/g09/l301.exe)
 Basis read from rwf:  (5D, 7F)
 Pseudo-potential data read from rwf file.
 There are   690 symmetry adapted basis functions of A   symmetry.
 Integral buffers will be    131072 words long.
 Raffenetti 2 integral format.
 Two-electron integral symmetry is turned on.
   690 basis functions,  1302 primitive gaussians,   730 cartesian basis functions
   143 alpha electrons      143 beta electrons
       nuclear repulsion energy      4195.9906862510 Hartrees.
 IExCor=  402 DFT=T Ex+Corr=B3LYP ExCW=0 ScaHFX=  0.200000
 ScaDFX=  0.800000  0.720000  1.000000  0.810000 ScalE2=  1.000000  1.000000
 IRadAn=      0 IRanWt=     -1 IRanGd=            0 ICorTp=0
 NAtoms=   66 NActive=   66 NUniq=   66 SFac= 1.00D+00 NAtFMM=   50 NAOKFM=T Big=T
 No density basis found on file   724.
 ------------------------------------------------------------------------------
 Polarizable Continuum Model (PCM)
 =================================
 Model                : PCM.
 Atomic radii         : UFF (Universal Force Field).
 Polarization charges : Total charges.
 Charge compensation  : None.
 Solution method      : Matrix inversion.
 Cavity type          : Scaled VdW (van der Waals Surface) (Alpha=1.100).
 Cavity algorithm     : GePol (No added spheres)
                        Default sphere list used, NSphG=   66.
                        Lebedev-Laikov grids with approx.  5.0 points / Ang**2.
                        Smoothing algorithm: Karplus/York (Gamma=1.0000).
                        Polarization charges: spherical gaussians, with
                                              point-specific exponents (IZeta= 3).
                        Self-potential: point-specific (ISelfS= 7).
                        Self-field    : sphere-specific E.n sum rule (ISelfD= 2).
 1st derivatives      : Analytical E(r).r(x)/FMM algorithm (CHGder, D1EAlg=3).
                        Cavity 1st derivative terms included.
 Solvent              : Water, Eps=  78.355300 Eps(inf)=   1.777849
 ------------------------------------------------------------------------------
 GePol: Number of generator spheres                  =      66
 GePol: Total number of spheres                      =      66
 GePol: Number of exposed spheres                    =      66 (100.00%)
 GePol: Number of points                             =    4954
 GePol: Average weight of points                     =       0.13
 GePol: Minimum weight of points                     =   0.11D-11
 GePol: Maximum weight of points                     =    0.20577
 GePol: Number of points with low weight             =     309
 GePol: Fraction of low-weight points (<1% of avg)   =       6.24%
 GePol: Cavity surface area                          =    636.113 Ang**2
 GePol: Cavity volume                                =    707.327 Ang**3
 Leave Link  301 at Thu Oct 13 22:44:02 2016, MaxMem= 1342177280 cpu:       1.9
 (Enter /opt/software/g09/linda-exe/l302.exel)
 NPDir=0 NMtPBC=     1 NCelOv=     1 NCel=       1 NClECP=     1 NCelD=      1
         NCelK=      1 NCelE2=     1 NClLst=     1 CellRange=     0.0.
 One-electron integrals computed using PRISM.
   1 Symmetry operations used in ECPInt.
 ECPInt:  NShTT=   28441 NPrTT=  163533 LenC2=   15929 LenP2D=   48996.
 LDataN:  DoStor=T MaxTD1= 4 Len=   56
 NBasis=   690 RedAO= T  NBF=   690
 NBsUse=   690 1.00D-06 NBFU=   690
 Precomputing XC quadrature grid using
 IXCGrd= 2 IRadAn=           0 IRanWt=          -1 IRanGd=           0 AccXCQ= 0.00D+00.
 NRdTot=    4292 NPtTot=      549684 NUsed=      580599 NTot=      580631
 NSgBfM=   601   608   608   611   611 NAtAll=    66    66.
 Leave Link  302 at Thu Oct 13 22:44:07 2016, MaxMem= 1342177280 cpu:      89.8
 (Enter /opt/software/g09/l303.exe)
 DipDrv:  MaxL=1.
 Leave Link  303 at Thu Oct 13 22:44:08 2016, MaxMem= 1342177280 cpu:       3.9
 (Enter /opt/software/g09/linda-exe/l401.exel)
 Initial guess read from the read-write file.
 B after Tr=     0.000000    0.000000    0.000000
         Rot=    1.000000    0.000000    0.000000    0.000000 Ang=   0.00 deg.
 Guess basis will be translated and rotated to current coordinates.
 Initial guess orbital symmetries:
 Alpha Orbitals:
       Occupied  (A) (A) (A) (A) (A) (A) (A) (A) (A) (A) (A) (A)
                 (A) (A) (A) (A) (A) (A) (A) (A) (A) (A) (A) (A)
                 (A) (A) (A) (A) (A) (A) (A) (A) (A) (A) (A) (A)
                 (A) (A) (A) (A) (A) (A) (A) (A) (A) (A) (A) (A)
                 (A) (A) (A) (A) (A) (A) (A) (A) (A) (A) (A) (A)
                 (A) (A) (A) (A) (A) (A) (A) (A) (A) (A) (A) (A)
                 (A) (A) (A) (A) (A) (A) (A) (A) (A) (A) (A) (A)
                 (A) (A) (A) (A) (A) (A) (A) (A) (A) (A) (A) (A)
                 (A) (A) (A) (A) (A) (A) (A) (A) (A) (A) (A) (A)
                 (A) (A) (A) (A) (A) (A) (A) (A) (A) (A) (A) (A)
                 (A) (A) (A) (A) (A) (A) (A) (A) (A) (A) (A) (A)
                 (A) (A) (A) (A) (A) (A) (A) (A) (A) (A) (A)
       Virtual   (A) (A) (A) (A) (A) (A) (A) (A) (A) (A) (A) (A)
                 (A) (A) (A) (A) (A) (A) (A) (A) (A) (A) (A) (A)
                 (A) (A) (A) (A) (A) (A) (A) (A) (A) (A) (A) (A)
                 (A) (A) (A) (A) (A) (A) (A) (A) (A) (A) (A) (A)
                 (A) (A) (A) (A) (A) (A) (A) (A) (A) (A) (A) (A)
                 (A) (A) (A) (A) (A) (A) (A) (A) (A) (A) (A) (A)
                 (A) (A) (A) (A) (A) (A) (A) (A) (A) (A) (A) (A)
                 (A) (A) (A) (A) (A) (A) (A) (A) (A) (A) (A) (A)
                 (A) (A) (A) (A) (A) (A) (A) (A) (A) (A) (A) (A)
                 (A) (A) (A) (A) (A) (A) (A) (A) (A) (A) (A) (A)
                 (A) (A) (A) (A) (A) (A) (A) (A) (A) (A) (A) (A)
                 (A) (A) (A) (A) (A) (A) (A) (A) (A) (A) (A) (A)
                 (A) (A) (A) (A) (A) (A) (A) (A) (A) (A) (A) (A)
                 (A) (A) (A) (A) (A) (A) (A) (A) (A) (A) (A) (A)
                 (A) (A) (A) (A) (A) (A) (A) (A) (A) (A) (A) (A)
                 (A) (A) (A) (A) (A) (A) (A) (A) (A) (A) (A) (A)
                 (A) (A) (A) (A) (A) (A) (A) (A) (A) (A) (A) (A)
                 (A) (A) (A) (A) (A) (A) (A) (A) (A) (A) (A) (A)
                 (A) (A) (A) (A) (A) (A) (A) (A) (A) (A) (A) (A)
                 (A) (A) (A) (A) (A) (A) (A) (A) (A) (A) (A) (A)
                 (A) (A) (A) (A) (A) (A) (A) (A) (A) (A) (A) (A)
                 (A) (A) (A) (A) (A) (A) (A) (A) (A) (A) (A) (A)
                 (A) (A) (A) (A) (A) (A) (A) (A) (A) (A) (A) (A)
                 (A) (A) (A) (A) (A) (A) (A) (A) (A) (A) (A) (A)
                 (A) (A) (A) (A) (A) (A) (A) (A) (A) (A) (A) (A)
                 (A) (A) (A) (A) (A) (A) (A) (A) (A) (A) (A) (A)
                 (A) (A) (A) (A) (A) (A) (A) (A) (A) (A) (A) (A)
                 (A) (A) (A) (A) (A) (A) (A) (A) (A) (A) (A) (A)
                 (A) (A) (A) (A) (A) (A) (A) (A) (A) (A) (A) (A)
                 (A) (A) (A) (A) (A) (A) (A) (A) (A) (A) (A) (A)
                 (A) (A) (A) (A) (A) (A) (A) (A) (A) (A) (A) (A)
                 (A) (A) (A) (A) (A) (A) (A) (A) (A) (A) (A) (A)
                 (A) (A) (A) (A) (A) (A) (A) (A) (A) (A) (A) (A)
                 (A) (A) (A) (A) (A) (A) (A) (A) (A) (A) (A) (A)
                 (A) (A) (A) (A) (A) (A) (A) (A) (A) (A) (A) (A)
                 (A) (A) (A) (A) (A) (A) (A) (A) (A) (A) (A) (A)
                 (A) (A) (A) (A) (A) (A) (A) (A) (A) (A) (A) (A)
                 (A) (A) (A) (A) (A) (A) (A) (A) (A) (A) (A) (A)
                 (A) (A) (A) (A) (A) (A) (A) (A) (A) (A) (A) (A)
                 (A) (A) (A) (A) (A) (A) (A) (A) (A) (A) (A) (A)
                 (A) (A) (A) (A) (A) (A) (A) (A) (A) (A) (A) (A)
                 (A) (A) (A) (A) (A) (A) (A) (A) (A) (A) (A) (A)
                 (A) (A) (A) (A) (A) (A) (A) (A) (A) (A) (A) (A)
                 (A) (A) (A) (A) (A) (A) (A) (A) (A) (A) (A) (A)
                 (A) (A) (A) (A) (A) (A) (A) (A) (A) (A) (A) (A)
                 (A) (A) (A) (A) (A) (A) (A)
 Beta  Orbitals:
       Occupied  (A) (A) (A) (A) (A) (A) (A) (A) (A) (A) (A) (A)
                 (A) (A) (A) (A) (A) (A) (A) (A) (A) (A) (A) (A)
                 (A) (A) (A) (A) (A) (A) (A) (A) (A) (A) (A) (A)
                 (A) (A) (A) (A) (A) (A) (A) (A) (A) (A) (A) (A)
                 (A) (A) (A) (A) (A) (A) (A) (A) (A) (A) (A) (A)
                 (A) (A) (A) (A) (A) (A) (A) (A) (A) (A) (A) (A)
                 (A) (A) (A) (A) (A) (A) (A) (A) (A) (A) (A) (A)
                 (A) (A) (A) (A) (A) (A) (A) (A) (A) (A) (A) (A)
                 (A) (A) (A) (A) (A) (A) (A) (A) (A) (A) (A) (A)
                 (A) (A) (A) (A) (A) (A) (A) (A) (A) (A) (A) (A)
                 (A) (A) (A) (A) (A) (A) (A) (A) (A) (A) (A) (A)
                 (A) (A) (A) (A) (A) (A) (A) (A) (A) (A) (A)
       Virtual   (A) (A) (A) (A) (A) (A) (A) (A) (A) (A) (A) (A)
                 (A) (A) (A) (A) (A) (A) (A) (A) (A) (A) (A) (A)
                 (A) (A) (A) (A) (A) (A) (A) (A) (A) (A) (A) (A)
                 (A) (A) (A) (A) (A) (A) (A) (A) (A) (A) (A) (A)
                 (A) (A) (A) (A) (A) (A) (A) (A) (A) (A) (A) (A)
                 (A) (A) (A) (A) (A) (A) (A) (A) (A) (A) (A) (A)
                 (A) (A) (A) (A) (A) (A) (A) (A) (A) (A) (A) (A)
                 (A) (A) (A) (A) (A) (A) (A) (A) (A) (A) (A) (A)
                 (A) (A) (A) (A) (A) (A) (A) (A) (A) (A) (A) (A)
                 (A) (A) (A) (A) (A) (A) (A) (A) (A) (A) (A) (A)
                 (A) (A) (A) (A) (A) (A) (A) (A) (A) (A) (A) (A)
                 (A) (A) (A) (A) (A) (A) (A) (A) (A) (A) (A) (A)
                 (A) (A) (A) (A) (A) (A) (A) (A) (A) (A) (A) (A)
                 (A) (A) (A) (A) (A) (A) (A) (A) (A) (A) (A) (A)
                 (A) (A) (A) (A) (A) (A) (A) (A) (A) (A) (A) (A)
                 (A) (A) (A) (A) (A) (A) (A) (A) (A) (A) (A) (A)
                 (A) (A) (A) (A) (A) (A) (A) (A) (A) (A) (A) (A)
                 (A) (A) (A) (A) (A) (A) (A) (A) (A) (A) (A) (A)
                 (A) (A) (A) (A) (A) (A) (A) (A) (A) (A) (A) (A)
                 (A) (A) (A) (A) (A) (A) (A) (A) (A) (A) (A) (A)
                 (A) (A) (A) (A) (A) (A) (A) (A) (A) (A) (A) (A)
                 (A) (A) (A) (A) (A) (A) (A) (A) (A) (A) (A) (A)
                 (A) (A) (A) (A) (A) (A) (A) (A) (A) (A) (A) (A)
                 (A) (A) (A) (A) (A) (A) (A) (A) (A) (A) (A) (A)
                 (A) (A) (A) (A) (A) (A) (A) (A) (A) (A) (A) (A)
                 (A) (A) (A) (A) (A) (A) (A) (A) (A) (A) (A) (A)
                 (A) (A) (A) (A) (A) (A) (A) (A) (A) (A) (A) (A)
                 (A) (A) (A) (A) (A) (A) (A) (A) (A) (A) (A) (A)
                 (A) (A) (A) (A) (A) (A) (A) (A) (A) (A) (A) (A)
                 (A) (A) (A) (A) (A) (A) (A) (A) (A) (A) (A) (A)
                 (A) (A) (A) (A) (A) (A) (A) (A) (A) (A) (A) (A)
                 (A) (A) (A) (A) (A) (A) (A) (A) (A) (A) (A) (A)
                 (A) (A) (A) (A) (A) (A) (A) (A) (A) (A) (A) (A)
                 (A) (A) (A) (A) (A) (A) (A) (A) (A) (A) (A) (A)
                 (A) (A) (A) (A) (A) (A) (A) (A) (A) (A) (A) (A)
                 (A) (A) (A) (A) (A) (A) (A) (A) (A) (A) (A) (A)
                 (A) (A) (A) (A) (A) (A) (A) (A) (A) (A) (A) (A)
                 (A) (A) (A) (A) (A) (A) (A) (A) (A) (A) (A) (A)
                 (A) (A) (A) (A) (A) (A) (A) (A) (A) (A) (A) (A)
                 (A) (A) (A) (A) (A) (A) (A) (A) (A) (A) (A) (A)
                 (A) (A) (A) (A) (A) (A) (A) (A) (A) (A) (A) (A)
                 (A) (A) (A) (A) (A) (A) (A) (A) (A) (A) (A) (A)
                 (A) (A) (A) (A) (A) (A) (A) (A) (A) (A) (A) (A)
                 (A) (A) (A) (A) (A) (A) (A) (A) (A) (A) (A) (A)
                 (A) (A) (A) (A) (A) (A) (A) (A) (A) (A) (A) (A)
                 (A) (A) (A) (A) (A) (A) (A)
 The electronic state of the initial guess is 1-A.
 Initial guess <Sx>= 0.0000 <Sy>= 0.0000 <Sz>= 0.0000 <S**2>= 0.0000 S= 0.0000
 Generating alternative initial guess.
 Harris functional with IExCor=  402 diagonalized for initial guess.
 ExpMin= 1.61D-01 ExpMax= 5.48D+03 ExpMxC= 8.25D+02 IAcc=1 IRadAn=         1 AccDes= 0.00D+00
 HarFok:  IExCor=  402 AccDes= 0.00D+00 IRadAn=         1 IDoV= 1
 ScaDFX=  1.000000  1.000000  1.000000  1.000000
 FoFCou: FMM=F IPFlag=           0 FMFlag=      100000 FMFlg1=        2001
         NFxFlg=           0 DoJE=T BraDBF=F KetDBF=T FulRan=T
         Omega=  0.000000  0.000000  1.000000  0.000000  0.000000 ICntrl=     500 IOpCl=  0
         NMat0=    1 NMatS0=    1 NMatT0=    0 NMatD0=    1 NMtDS0=    0 NMtDT0=    0
         I1Cent=           4 NGrid=           0.
 Petite list used in FoFCou.
 Harris En= -1899.32563163753    
 Leave Link  401 at Thu Oct 13 22:44:20 2016, MaxMem= 1342177280 cpu:     206.1
 (Enter /opt/software/g09/linda-exe/l502.exel)
 UHF open shell SCF:
 Requested convergence on RMS density matrix=1.00D-08 within 128 cycles.
 Requested convergence on MAX density matrix=1.00D-06.
 Requested convergence on             energy=1.00D-06.
 No special actions if energy rises.
 Using DIIS extrapolation, IDIIS=  1040.
 Integral symmetry usage will be decided dynamically.
       579992 words used for storage of precomputed grid.
 IEnd=     2216878 IEndB=     2216878 NGot=  1342177280 MDV=  1340510673
 LenX=  1340510673 LenY=  1339977043
 Fock matrices will be formed incrementally for  20 cycles.

 Cycle   1  Pass 1  IDiag  1:
 FoFCou: FMM=T IPFlag=           0 FMFlag=      100000 FMFlg1=        2001
         NFxFlg=           0 DoJE=F BraDBF=F KetDBF=F FulRan=T
         Omega=  0.000000  0.000000  1.000000  0.000000  0.000000 ICntrl=       0 IOpCl=  1
         NMat0=    1 NMatS0=    1 NMatT0=    0 NMatD0=    1 NMtDS0=    0 NMtDT0=    0
         I1Cent=           0 NGrid=           0.
 Symmetry not used in FoFCou.
 FMM levels:  10  Number of levels for PrismC:   9
 E= -1899.47218622526    
 DIIS: error= 2.73D-03 at cycle   1 NSaved=   1.
 NSaved= 1 IEnMin= 1 EnMin= -1899.47218622526     IErMin= 1 ErrMin= 2.73D-03
 ErrMax= 2.73D-03 EMaxC= 1.00D-01 BMatC= 6.57D-02 BMatP= 6.57D-02
 IDIUse=3 WtCom= 9.73D-01 WtEn= 2.73D-02
 Coeff-Com:  0.100D+01
 Coeff-En:   0.100D+01
 Coeff:      0.100D+01
 Gap=     0.187 Goal=   None    Shift=    0.000
 Gap=     0.187 Goal=   None    Shift=    0.000
 GapD=    0.187 DampG=1.000 DampE=1.000 DampFc=1.0000 IDamp=-1.
 RMSDP=3.10D-04 MaxDP=1.36D-02              OVMax= 2.24D-02

 Cycle   2  Pass 1  IDiag  1:
 RMSU=  2.19D-04    CP:  9.99D-01
 E= -1899.49792006712     Delta-E=       -0.025733841867 Rises=F Damp=F
 DIIS: error= 4.67D-04 at cycle   2 NSaved=   2.
 NSaved= 2 IEnMin= 2 EnMin= -1899.49792006712     IErMin= 2 ErrMin= 4.67D-04
 ErrMax= 4.67D-04 EMaxC= 1.00D-01 BMatC= 2.45D-03 BMatP= 6.57D-02
 IDIUse=3 WtCom= 9.95D-01 WtEn= 4.67D-03
 Coeff-Com: -0.944D-02 0.101D+01
 Coeff-En:   0.000D+00 0.100D+01
 Coeff:     -0.939D-02 0.101D+01
 Gap=     0.157 Goal=   None    Shift=    0.000
 Gap=     0.157 Goal=   None    Shift=    0.000
 RMSDP=8.92D-05 MaxDP=7.03D-03 DE=-2.57D-02 OVMax= 8.88D-03

 Cycle   3  Pass 1  IDiag  1:
 RMSU=  6.30D-05    CP:  9.99D-01  1.02D+00
 E= -1899.49743215649     Delta-E=        0.000487910630 Rises=F Damp=F
 DIIS: error= 8.51D-04 at cycle   3 NSaved=   3.
 NSaved= 3 IEnMin= 2 EnMin= -1899.49792006712     IErMin= 2 ErrMin= 4.67D-04
 ErrMax= 8.51D-04 EMaxC= 1.00D-01 BMatC= 5.32D-03 BMatP= 2.45D-03
 IDIUse=3 WtCom= 2.55D-01 WtEn= 7.45D-01
 Coeff-Com: -0.407D-01 0.630D+00 0.411D+00
 Coeff-En:   0.000D+00 0.629D+00 0.371D+00
 Coeff:     -0.104D-01 0.629D+00 0.381D+00
 Gap=     0.158 Goal=   None    Shift=    0.000
 Gap=     0.158 Goal=   None    Shift=    0.000
 RMSDP=5.38D-05 MaxDP=4.97D-03 DE= 4.88D-04 OVMax= 7.08D-03

 Cycle   4  Pass 1  IDiag  1:
 RMSU=  1.37D-05    CP:  9.99D-01  1.06D+00  4.54D-01
 E= -1899.49863446957     Delta-E=       -0.001202313074 Rises=F Damp=F
 DIIS: error= 1.33D-04 at cycle   4 NSaved=   4.
 NSaved= 4 IEnMin= 4 EnMin= -1899.49863446957     IErMin= 4 ErrMin= 1.33D-04
 ErrMax= 1.33D-04 EMaxC= 1.00D-01 BMatC= 8.82D-05 BMatP= 2.45D-03
 IDIUse=3 WtCom= 9.99D-01 WtEn= 1.33D-03
 Coeff-Com: -0.189D-01 0.239D+00 0.179D+00 0.601D+00
 Coeff-En:   0.000D+00 0.000D+00 0.000D+00 0.100D+01
 Coeff:     -0.188D-01 0.238D+00 0.179D+00 0.602D+00
 Gap=     0.158 Goal=   None    Shift=    0.000
 Gap=     0.158 Goal=   None    Shift=    0.000
 RMSDP=1.01D-05 MaxDP=9.09D-04 DE=-1.20D-03 OVMax= 1.55D-03

 Cycle   5  Pass 1  IDiag  1:
 RMSU=  6.11D-06    CP:  9.99D-01  1.06D+00  4.61D-01  7.62D-01
 E= -1899.49864953355     Delta-E=       -0.000015063980 Rises=F Damp=F
 DIIS: error= 7.60D-05 at cycle   5 NSaved=   5.
 NSaved= 5 IEnMin= 5 EnMin= -1899.49864953355     IErMin= 5 ErrMin= 7.60D-05
 ErrMax= 7.60D-05 EMaxC= 1.00D-01 BMatC= 3.12D-05 BMatP= 8.82D-05
 IDIUse=1 WtCom= 1.00D+00 WtEn= 0.00D+00
 Coeff-Com: -0.378D-02 0.276D-01 0.342D-01 0.380D+00 0.562D+00
 Coeff:     -0.378D-02 0.276D-01 0.342D-01 0.380D+00 0.562D+00
 Gap=     0.158 Goal=   None    Shift=    0.000
 Gap=     0.158 Goal=   None    Shift=    0.000
 RMSDP=4.28D-06 MaxDP=3.77D-04 DE=-1.51D-05 OVMax= 5.70D-04

 Cycle   6  Pass 1  IDiag  1:
 RMSU=  1.80D-06    CP:  9.99D-01  1.06D+00  4.71D-01  8.66D-01  6.96D-01
 E= -1899.49865621961     Delta-E=       -0.000006686062 Rises=F Damp=F
 DIIS: error= 1.83D-05 at cycle   6 NSaved=   6.
 NSaved= 6 IEnMin= 6 EnMin= -1899.49865621961     IErMin= 6 ErrMin= 1.83D-05
 ErrMax= 1.83D-05 EMaxC= 1.00D-01 BMatC= 2.44D-06 BMatP= 3.12D-05
 IDIUse=1 WtCom= 1.00D+00 WtEn= 0.00D+00
 Coeff-Com: -0.127D-03-0.100D-01 0.517D-04 0.146D+00 0.301D+00 0.562D+00
 Coeff:     -0.127D-03-0.100D-01 0.517D-04 0.146D+00 0.301D+00 0.562D+00
 Gap=     0.158 Goal=   None    Shift=    0.000
 Gap=     0.158 Goal=   None    Shift=    0.000
 RMSDP=1.37D-06 MaxDP=9.67D-05 DE=-6.69D-06 OVMax= 1.41D-04

 Cycle   7  Pass 1  IDiag  1:
 RMSU=  6.19D-07    CP:  9.99D-01  1.06D+00  4.74D-01  8.80D-01  7.24D-01
                    CP:  6.26D-01
 E= -1899.49865670412     Delta-E=       -0.000000484509 Rises=F Damp=F
 DIIS: error= 7.90D-06 at cycle   7 NSaved=   7.
 NSaved= 7 IEnMin= 7 EnMin= -1899.49865670412     IErMin= 7 ErrMin= 7.90D-06
 ErrMax= 7.90D-06 EMaxC= 1.00D-01 BMatC= 3.38D-07 BMatP= 2.44D-06
 IDIUse=1 WtCom= 1.00D+00 WtEn= 0.00D+00
 Coeff-Com:  0.372D-03-0.944D-02-0.432D-02 0.371D-01 0.102D+00 0.321D+00
 Coeff-Com:  0.553D+00
 Coeff:      0.372D-03-0.944D-02-0.432D-02 0.371D-01 0.102D+00 0.321D+00
 Coeff:      0.553D+00
 Gap=     0.158 Goal=   None    Shift=    0.000
 Gap=     0.158 Goal=   None    Shift=    0.000
 RMSDP=4.56D-07 MaxDP=4.09D-05 DE=-4.85D-07 OVMax= 4.88D-05

 Cycle   8  Pass 1  IDiag  1:
 RMSU=  2.15D-07    CP:  9.99D-01  1.06D+00  4.74D-01  8.83D-01  7.29D-01
                    CP:  6.90D-01  6.70D-01
 E= -1899.49865677023     Delta-E=       -0.000000066109 Rises=F Damp=F
 DIIS: error= 3.49D-06 at cycle   8 NSaved=   8.
 NSaved= 8 IEnMin= 8 EnMin= -1899.49865677023     IErMin= 8 ErrMin= 3.49D-06
 ErrMax= 3.49D-06 EMaxC= 1.00D-01 BMatC= 4.19D-08 BMatP= 3.38D-07
 IDIUse=1 WtCom= 1.00D+00 WtEn= 0.00D+00
 Coeff-Com:  0.232D-03-0.474D-02-0.261D-02 0.798D-02 0.313D-01 0.137D+00
 Coeff-Com:  0.328D+00 0.502D+00
 Coeff:      0.232D-03-0.474D-02-0.261D-02 0.798D-02 0.313D-01 0.137D+00
 Coeff:      0.328D+00 0.502D+00
 Gap=     0.158 Goal=   None    Shift=    0.000
 Gap=     0.158 Goal=   None    Shift=    0.000
 RMSDP=1.56D-07 MaxDP=1.66D-05 DE=-6.61D-08 OVMax= 2.01D-05

 Cycle   9  Pass 1  IDiag  1:
 RMSU=  7.42D-08    CP:  9.99D-01  1.06D+00  4.74D-01  8.84D-01  7.33D-01
                    CP:  6.94D-01  7.10D-01  6.57D-01
 E= -1899.49865677865     Delta-E=       -0.000000008420 Rises=F Damp=F
 DIIS: error= 7.90D-07 at cycle   9 NSaved=   9.
 NSaved= 9 IEnMin= 9 EnMin= -1899.49865677865     IErMin= 9 ErrMin= 7.90D-07
 ErrMax= 7.90D-07 EMaxC= 1.00D-01 BMatC= 2.72D-09 BMatP= 4.19D-08
 IDIUse=1 WtCom= 1.00D+00 WtEn= 0.00D+00
 Coeff-Com:  0.601D-04-0.975D-03-0.636D-03-0.117D-02 0.798D-03 0.223D-01
 Coeff-Com:  0.823D-01 0.241D+00 0.656D+00
 Coeff:      0.601D-04-0.975D-03-0.636D-03-0.117D-02 0.798D-03 0.223D-01
 Coeff:      0.823D-01 0.241D+00 0.656D+00
 Gap=     0.158 Goal=   None    Shift=    0.000
 Gap=     0.158 Goal=   None    Shift=    0.000
 RMSDP=4.90D-08 MaxDP=4.17D-06 DE=-8.42D-09 OVMax= 6.49D-06

 Cycle  10  Pass 1  IDiag  1:
 RMSU=  2.53D-08    CP:  9.99D-01  1.06D+00  4.74D-01  8.84D-01  7.33D-01
                    CP:  6.97D-01  7.19D-01  7.16D-01  7.65D-01
 E= -1899.49865677923     Delta-E=       -0.000000000582 Rises=F Damp=F
 DIIS: error= 2.32D-07 at cycle  10 NSaved=  10.
 NSaved=10 IEnMin=10 EnMin= -1899.49865677923     IErMin=10 ErrMin= 2.32D-07
 ErrMax= 2.32D-07 EMaxC= 1.00D-01 BMatC= 4.08D-10 BMatP= 2.72D-09
 IDIUse=1 WtCom= 1.00D+00 WtEn= 0.00D+00
 Coeff-Com:  0.891D-05-0.297D-04-0.612D-04-0.130D-02-0.262D-02-0.208D-02
 Coeff-Com:  0.101D-01 0.743D-01 0.348D+00 0.574D+00
 Coeff:      0.891D-05-0.297D-04-0.612D-04-0.130D-02-0.262D-02-0.208D-02
 Coeff:      0.101D-01 0.743D-01 0.348D+00 0.574D+00
 Gap=     0.158 Goal=   None    Shift=    0.000
 Gap=     0.158 Goal=   None    Shift=    0.000
 RMSDP=1.79D-08 MaxDP=1.30D-06 DE=-5.82D-10 OVMax= 2.73D-06

 Cycle  11  Pass 1  IDiag  1:
 RMSU=  7.97D-09    CP:  9.99D-01  1.06D+00  4.74D-01  8.84D-01  7.33D-01
                    CP:  6.98D-01  7.22D-01  7.23D-01  8.32D-01  6.92D-01
 E= -1899.49865677932     Delta-E=       -0.000000000093 Rises=F Damp=F
 DIIS: error= 9.80D-08 at cycle  11 NSaved=  11.
 NSaved=11 IEnMin=11 EnMin= -1899.49865677932     IErMin=11 ErrMin= 9.80D-08
 ErrMax= 9.80D-08 EMaxC= 1.00D-01 BMatC= 5.01D-11 BMatP= 4.08D-10
 IDIUse=1 WtCom= 1.00D+00 WtEn= 0.00D+00
 Coeff-Com: -0.184D-05 0.967D-04 0.416D-04-0.600D-03-0.157D-02-0.379D-02
 Coeff-Com: -0.369D-02 0.140D-01 0.119D+00 0.319D+00 0.558D+00
 Coeff:     -0.184D-05 0.967D-04 0.416D-04-0.600D-03-0.157D-02-0.379D-02
 Coeff:     -0.369D-02 0.140D-01 0.119D+00 0.319D+00 0.558D+00
 Gap=     0.158 Goal=   None    Shift=    0.000
 Gap=     0.158 Goal=   None    Shift=    0.000
 RMSDP=5.94D-09 MaxDP=4.22D-07 DE=-9.28D-11 OVMax= 7.79D-07

 Error on total polarization charges =  0.01281
 SCF Done:  E(UB3LYP) =  -1899.49865678     A.U. after   11 cycles
             Convg  =    0.5940D-08             -V/T =  2.0066
 <Sx>= 0.0000 <Sy>= 0.0000 <Sz>= 0.0000 <S**2>= 0.0000 S= 0.0000
 <L.S>= 0.000000000000E+00
 KE= 1.887103139717D+03 PE=-1.282597423654D+04 EE= 4.843381753791D+03
 Annihilation of the first spin contaminant:
 S**2 before annihilation     0.0000,   after     0.0000
 Leave Link  502 at Thu Oct 13 22:50:37 2016, MaxMem= 1342177280 cpu:    7069.1
 (Enter /opt/software/g09/linda-exe/l701.exel)
 Compute integral first derivatives.
 ... and contract with generalized density number  0.
   1 Symmetry operations used in ECPInt.
 ECPInt:  NShTT=   28441 NPrTT=  163533 LenC2=   15929 LenP2D=   48996.
 LDataN:  DoStor=T MaxTD1= 5 Len=  102
 D1PCM: PCM CHGder 1st derivatives, ID1Alg=3 FixD1E=F DoIter=F DoCFld=F I1PDM=0.
 GePol: Maximum number of non-zero 1st derivatives   =     197
 Leave Link  701 at Thu Oct 13 22:50:48 2016, MaxMem= 1342177280 cpu:     209.3
 (Enter /opt/software/g09/l702.exe)
 L702 exits ... SP integral derivatives will be done elsewhere.
 Leave Link  702 at Thu Oct 13 22:50:49 2016, MaxMem= 1342177280 cpu:       0.3
 (Enter /opt/software/g09/linda-exe/l703.exel)
 Compute integral first derivatives, UseDBF=F ICtDFT=           0.
 Integral derivatives from FoFDir, PRISM(SPDF).
 Calling FoFJK, ICntrl=      2127 FMM=T ISym2X=0 I1Cent= 0 IOpClX= 1 NMat=1 NMatS=1 NMatT=0.
 FoFCou: FMM=T IPFlag=           0 FMFlag=      100000 FMFlg1=        2001
         NFxFlg=           0 DoJE=F BraDBF=F KetDBF=F FulRan=T
         Omega=  0.000000  0.000000  1.000000  0.000000  0.000000 ICntrl=    2127 IOpCl=  1
         NMat0=    1 NMatS0=    1 NMatT0=    0 NMatD0=    1 NMtDS0=    0 NMtDT0=    0
         I1Cent=           0 NGrid=           0.
 Symmetry not used in FoFCou.
 FMM levels:  10  Number of levels for PrismC:   9
 Leave Link  703 at Thu Oct 13 22:51:11 2016, MaxMem= 1342177280 cpu:     423.7
 (Enter /opt/software/g09/l716.exe)
 Dipole        =-1.14033896D-01 2.69621748D+00 1.25641859D+00
 ***** Axes restored to original set *****
 -------------------------------------------------------------------
 Center     Atomic                   Forces (Hartrees/Bohr)
 Number     Number              X              Y              Z
 -------------------------------------------------------------------
      1        8          -0.002810619   -0.000183989    0.002772985
      2        6           0.001295707    0.002219543   -0.001157395
      3        6           0.007422564   -0.001276661    0.006529613
      4        6           0.000762170    0.000003145    0.000392094
      5        6           0.003349251   -0.000027907    0.000130781
      6        8           0.001259784    0.000096808   -0.001092862
      7        6          -0.001342177    0.003184437    0.008691287
      8        6          -0.009069374   -0.034673751    0.060618585
      9        8           0.019823065    0.004829618    0.024652800
     10        8          -0.002009905   -0.003116568   -0.004683062
     11        7           0.001514423   -0.002759321   -0.005497885
     12        7           0.001913157    0.002270540   -0.021644280
     13        7          -0.003458358   -0.001837628    0.018232473
     14        6           0.001810790   -0.000887061    0.006416038
     15        6          -0.002174741    0.000181617   -0.000821401
     16        6           0.005216594   -0.000136528    0.002269085
     17        6          -0.000418449    0.000000584    0.000162917
     18        6           0.000263421   -0.000041036    0.000161623
     19        6           0.000359208   -0.000200187    0.000889682
     20        6          -0.007942573   -0.003785275    0.026120630
     21        7           0.002309706   -0.000427545    0.002467840
     22        6          -0.002719306    0.000826017    0.000459214
     23        6           0.001512954   -0.000431440   -0.000327175
     24        6          -0.000419199    0.000225839   -0.000126428
     25        6           0.000648868   -0.000198950    0.000884790
     26        6           0.000342097   -0.000123452    0.000119439
     27        6          -0.000516015    0.000089474   -0.000371204
     28        6          -0.001415342    0.000205469   -0.000228569
     29        8          -0.000356403   -0.000386159   -0.000466908
     30        7           0.025090642   -0.002257625    0.018839809
     31        7          -0.016602437    0.002288618   -0.017383694
     32        6          -0.017731517    0.003103005    0.006862376
     33        6           0.004168475   -0.003289993   -0.004703471
     34        6          -0.000279144    0.000552251    0.001656982
     35        6           0.000140787    0.000305925    0.000341293
     36        6          -0.000243991   -0.000015434    0.000078605
     37        6           0.000949956   -0.000322150   -0.001155658
     38        6          -0.003363284    0.000877776    0.002020950
     39        8           0.000795297   -0.000654008   -0.002341141
     40        1           0.002803836    0.000837511   -0.000452034
     41        1          -0.000469262    0.000192222    0.000009891
     42        1           0.000084126   -0.000195263   -0.000234869
     43        1          -0.001153931   -0.000439750    0.000038540
     44        1          -0.001113687    0.000655279   -0.000561860
     45        1          -0.000093800    0.001612353    0.000239068
     46        1          -0.006666096    0.000289399   -0.001414767
     47        1          -0.001576262    0.000319029   -0.002808926
     48        1          -0.000141116   -0.000028709    0.000028428
     49        1          -0.000133960   -0.000009889    0.000034891
     50        1          -0.000249112    0.000049322   -0.000470548
     51        1           0.000668194    0.000189021    0.000373973
     52        1          -0.000203412    0.000021874   -0.000245180
     53        1           0.000071542   -0.000007957   -0.000052991
     54        1           0.000020755    0.000034880   -0.000060089
     55        1           0.000114958    0.000061477    0.000092339
     56        1           0.000596666    0.000289887    0.000559159
     57        1           0.009175024    0.029785457   -0.080847928
     58        1          -0.015607674   -0.002601104   -0.014373897
     59        1           0.000128712   -0.000174199   -0.000352046
     60        1           0.000035734   -0.000031386   -0.000128549
     61        1           0.000089552   -0.000030484    0.000019318
     62        1          -0.000518795   -0.000009472    0.000023183
     63        1           0.002400988    0.000679573    0.002524082
     64        8           0.004052079    0.003777438   -0.029391598
     65        1           0.004083273    0.000036636    0.001917848
     66        1          -0.004474406    0.000468861   -0.004236194
 -------------------------------------------------------------------
 Cartesian Forces:  Max     0.080847928 RMS     0.009797940
 Leave Link  716 at Thu Oct 13 22:51:11 2016, MaxMem= 1342177280 cpu:       0.4
 (Enter /opt/software/g09/l103.exe)

 GradGradGradGradGradGradGradGradGradGradGradGradGradGradGradGradGradGrad
 Berny optimization.
 Using GEDIIS/GDIIS optimizer.
 Internal  Forces:  Max     0.070270756 RMS     0.005452141
 Search for a local minimum.
 Step number   2 out of a maximum of  343
 All quantities printed in internal units (Hartrees-Bohrs-Radians)
 RMS Force = .54521D-02 SwitMx=.10000D-02 MixMth= 1
 Mixed Optimization -- RFO/linear search
 Update second derivatives using D2CorX and points    1    2
 DE= -3.73D-02 DEPred=-3.66D-02 R= 1.02D+00
 SS=  1.41D+00  RLast= 3.22D-01 DXNew= 5.0454D-01 9.6495D-01
 Trust test= 1.02D+00 RLast= 3.22D-01 DXMaxT set to 5.05D-01
 ITU=  1  0
 Use linear search instead of GDIIS.
 Linear search step of   0.600 exceeds DXMaxT=   0.505 but not scaled.
 Quartic linear search produced a step of  2.00000.
 Iteration  1 RMS(Cart)=  0.17798443 RMS(Int)=  0.01084767
 Iteration  2 RMS(Cart)=  0.02257418 RMS(Int)=  0.00161359
 Iteration  3 RMS(Cart)=  0.00103748 RMS(Int)=  0.00157162
 Iteration  4 RMS(Cart)=  0.00001995 RMS(Int)=  0.00157162
 Iteration  5 RMS(Cart)=  0.00000013 RMS(Int)=  0.00157162
 Variable       Old X    -DE/DX   Delta X   Delta X   Delta X     New X
                                 (Linear)    (Quad)   (Total)
    R1        2.69656  -0.00242  -0.00570   0.00000  -0.00578   2.69078
    R2        1.86600  -0.00101   0.00034   0.00000   0.00063   1.86663
    R3        2.93373  -0.00049  -0.00082   0.00000  -0.00082   2.93291
    R4        2.93896   0.00014   0.00500   0.00000   0.00471   2.94367
    R5        2.94725  -0.00026   0.02269   0.00000   0.02269   2.96994
    R6        2.32056  -0.00084  -0.00342   0.00000  -0.00342   2.31714
    R7        2.56775  -0.00316  -0.01383   0.00000  -0.01383   2.55392
    R8        2.86355  -0.00013  -0.00302   0.00000  -0.00328   2.86027
    R9        2.07371  -0.00014  -0.00120   0.00000  -0.00120   2.07251
   R10        2.05652  -0.00022  -0.00131   0.00000  -0.00131   2.05521
   R11        2.89718   0.00166   0.03571   0.00000   0.03571   2.93288
   R12        2.05951  -0.00003  -0.00049   0.00000  -0.00049   2.05903
   R13        2.06859  -0.00088  -0.00531   0.00000  -0.00531   2.06327
   R14        2.34890   0.00523   0.01020   0.00000   0.01027   2.35917
   R15        2.56733  -0.00308  -0.00774   0.00000  -0.00774   2.55960
   R16        2.32114   0.00945   0.03377   0.00000   0.03385   2.35499
   R17        2.63614   0.00543   0.03563   0.00000   0.03366   2.66980
   R18        2.64324   0.07027   0.39805   0.00000   0.39464   3.03788
   R19        3.14490   0.02728   0.26772   0.00000   0.26840   3.41330
   R20        3.28758   0.00051   0.00905   0.00000   0.00939   3.29698
   R21        2.57675   0.00314   0.00713   0.00000   0.00713   2.58388
   R22        1.92990   0.00023   0.00126   0.00000   0.00126   1.93116
   R23        2.58736  -0.00302  -0.02430   0.00000  -0.02430   2.56306
   R24        1.92010   0.00374   0.01662   0.00000   0.01662   1.93672
   R25        2.43113  -0.00096  -0.01605   0.00000  -0.01605   2.41508
   R26        2.76653  -0.00145  -0.00169   0.00000  -0.00169   2.76484
   R27        2.06469   0.00323   0.01770   0.00000   0.01770   2.08239
   R28        2.66215   0.00120   0.00313   0.00000   0.00313   2.66528
   R29        2.67558  -0.00118  -0.00666   0.00000  -0.00665   2.66893
   R30        2.62851  -0.00023   0.00066   0.00000   0.00065   2.62916
   R31        2.03699   0.00610   0.02997   0.00000   0.02997   2.06696
   R32        2.63898   0.00089   0.00311   0.00000   0.00310   2.64209
   R33        2.05041  -0.00008  -0.00053   0.00000  -0.00053   2.04987
   R34        2.63282   0.00039   0.00068   0.00000   0.00068   2.63351
   R35        2.05205  -0.00014  -0.00078   0.00000  -0.00078   2.05126
   R36        2.64241  -0.00021  -0.00735   0.00000  -0.00734   2.63507
   R37        2.05566  -0.00053  -0.00318   0.00000  -0.00318   2.05248
   R38        2.64742  -0.02876  -0.10977   0.00000  -0.10977   2.53766
   R39        2.42990   0.00187   0.00435   0.00000   0.00435   2.43425
   R40        2.75770  -0.00026   0.00147   0.00000   0.00147   2.75917
   R41        2.07527  -0.00072  -0.00309   0.00000  -0.00309   2.07219
   R42        2.68132   0.00020   0.00463   0.00000   0.00463   2.68596
   R43        2.66125   0.00095   0.00318   0.00000   0.00318   2.66443
   R44        2.64536   0.00032   0.00090   0.00000   0.00090   2.64627
   R45        2.56437   0.00020   0.00053   0.00000   0.00053   2.56490
   R46        2.63243   0.00014   0.00056   0.00000   0.00056   2.63299
   R47        2.05566  -0.00031  -0.00149   0.00000  -0.00149   2.05417
   R48        2.64007   0.00076   0.00289   0.00000   0.00289   2.64296
   R49        2.05193  -0.00006  -0.00034   0.00000  -0.00034   2.05160
   R50        2.62677  -0.00012  -0.00022   0.00000  -0.00022   2.62654
   R51        2.05012  -0.00003  -0.00011   0.00000  -0.00011   2.05001
   R52        2.05407  -0.00013  -0.00040   0.00000  -0.00040   2.05368
   R53        1.82861   0.00076   0.00303   0.00000   0.00303   1.83163
   R54        2.60698   0.02538   0.07664   0.00000   0.07598   2.68296
   R55        1.95001   0.00576   0.04869   0.00000   0.05584   2.00585
   R56        2.44528   0.00716   0.01740   0.00000   0.01722   2.46250
   R57        3.32932  -0.00217  -0.00811   0.00000  -0.00791   3.32141
   R58        2.74855  -0.00153   0.00752   0.00000   0.00737   2.75592
   R59        2.07792   0.00100   0.00809   0.00000   0.00862   2.08654
   R60        2.66122   0.00067   0.00137   0.00000   0.00134   2.66256
   R61        2.68967   0.00030  -0.00007   0.00000  -0.00031   2.68936
   R62        2.62312  -0.00011   0.00135   0.00000   0.00137   2.62448
   R63        2.05490  -0.00036  -0.00120   0.00000  -0.00120   2.05370
   R64        2.65113   0.00052   0.00368   0.00000   0.00373   2.65486
   R65        2.05044  -0.00011  -0.00040   0.00000  -0.00040   2.05004
   R66        2.62697   0.00053   0.00137   0.00000   0.00141   2.62838
   R67        2.05300  -0.00009  -0.00036   0.00000  -0.00036   2.05264
   R68        2.65215  -0.00006   0.00078   0.00000   0.00076   2.65291
   R69        2.05101   0.00007   0.00112   0.00000   0.00112   2.05213
   R70        2.53994   0.00280   0.00134   0.00000   0.00129   2.54123
   R71        1.87180   0.00156   0.00539   0.00000   0.00556   1.87735
   R72        1.82154   0.00434   0.01482   0.00000   0.01482   1.83636
    A1        1.85830   0.00124   0.02101   0.00000   0.02067   1.87897
    A2        1.91654   0.00021   0.00322   0.00000   0.00343   1.91997
    A3        1.94072  -0.00008  -0.00773   0.00000  -0.00820   1.93252
    A4        1.92811   0.00042   0.01659   0.00000   0.01667   1.94478
    A5        1.85028   0.00011  -0.00587   0.00000  -0.00576   1.84452
    A6        1.85031  -0.00046  -0.01513   0.00000  -0.01520   1.83512
    A7        1.97355  -0.00021   0.00758   0.00000   0.00761   1.98116
    A8        2.10398   0.00143   0.00489   0.00000   0.00489   2.10887
    A9        1.97910   0.00049   0.00405   0.00000   0.00405   1.98315
   A10        2.20003  -0.00192  -0.00894   0.00000  -0.00894   2.19109
   A11        1.96794  -0.00019   0.00246   0.00000   0.00160   1.96954
   A12        1.88085  -0.00069  -0.00803   0.00000  -0.00784   1.87301
   A13        1.93191   0.00096   0.00912   0.00000   0.00942   1.94133
   A14        1.85233   0.00087   0.00313   0.00000   0.00327   1.85559
   A15        1.94764  -0.00093  -0.00806   0.00000  -0.00770   1.93994
   A16        1.87790   0.00000   0.00094   0.00000   0.00086   1.87876
   A17        2.03167   0.00299   0.06896   0.00000   0.06904   2.10071
   A18        1.88817  -0.00207  -0.03939   0.00000  -0.03859   1.84959
   A19        1.87483   0.00122   0.01002   0.00000   0.00995   1.88479
   A20        1.87293  -0.00077  -0.01934   0.00000  -0.01853   1.85440
   A21        1.89851  -0.00219  -0.02914   0.00000  -0.03077   1.86774
   A22        1.89423   0.00076   0.00640   0.00000   0.00582   1.90005
   A23        2.11892  -0.00051  -0.00952   0.00000  -0.01006   2.10886
   A24        2.07313   0.00069   0.00408   0.00000   0.00433   2.07746
   A25        2.09081  -0.00017   0.00564   0.00000   0.00589   2.09671
   A26        2.13095  -0.00639  -0.05704   0.00000  -0.05576   2.07519
   A27        1.97614   0.00059   0.00712   0.00000   0.01102   1.98716
   A28        1.59779   0.00687   0.05626   0.00000   0.05435   1.65213
   A29        2.17603   0.00581   0.04988   0.00000   0.04474   2.22078
   A30        2.28137   0.00214   0.00592   0.00000   0.01409   2.29546
   A31        2.13616   0.00038   0.00181   0.00000   0.00176   2.13792
   A32        2.02276   0.00054   0.00411   0.00000   0.00407   2.02682
   A33        2.11651  -0.00078  -0.00424   0.00000  -0.00428   2.11223
   A34        2.22817  -0.02252  -0.13139   0.00000  -0.13138   2.09679
   A35        2.02176   0.00579   0.02278   0.00000   0.02278   2.04454
   A36        2.03307   0.01673   0.10862   0.00000   0.10862   2.14170
   A37        2.03094  -0.00990  -0.10628   0.00000  -0.10628   1.92465
   A38        2.15764   0.00496   0.03000   0.00000   0.03000   2.18765
   A39        2.11524  -0.00260  -0.01689   0.00000  -0.01689   2.09835
   A40        2.01030  -0.00236  -0.01311   0.00000  -0.01311   1.99719
   A41        2.03117   0.00086  -0.00434   0.00000  -0.00434   2.02683
   A42        2.20342  -0.00120   0.00881   0.00000   0.00880   2.21222
   A43        2.04859   0.00034  -0.00447   0.00000  -0.00446   2.04413
   A44        2.13724  -0.00075  -0.00343   0.00000  -0.00344   2.13380
   A45        2.06896  -0.00066  -0.00631   0.00000  -0.00631   2.06265
   A46        2.07699   0.00140   0.00974   0.00000   0.00974   2.08673
   A47        2.07891   0.00014   0.00272   0.00000   0.00270   2.08161
   A48        2.09874  -0.00019  -0.00274   0.00000  -0.00273   2.09601
   A49        2.10553   0.00005   0.00003   0.00000   0.00004   2.10557
   A50        2.09331   0.00024  -0.00026   0.00000  -0.00027   2.09304
   A51        2.10415  -0.00010   0.00121   0.00000   0.00122   2.10536
   A52        2.08573  -0.00014  -0.00095   0.00000  -0.00095   2.08478
   A53        2.10944  -0.00073  -0.00698   0.00000  -0.00697   2.10246
   A54        2.09617   0.00028   0.00300   0.00000   0.00299   2.09916
   A55        2.07758   0.00045   0.00399   0.00000   0.00398   2.08156
   A56        2.09888   0.00076   0.01242   0.00000   0.01244   2.11133
   A57        2.08962  -0.00313  -0.01128   0.00000  -0.01129   2.07833
   A58        2.09468   0.00237  -0.00115   0.00000  -0.00116   2.09353
   A59        2.02932  -0.00181  -0.01260   0.00000  -0.01260   2.01672
   A60        2.17764   0.00061   0.00847   0.00000   0.00846   2.18610
   A61        2.10153  -0.00024  -0.00422   0.00000  -0.00422   2.09730
   A62        2.00401  -0.00037  -0.00423   0.00000  -0.00423   1.99978
   A63        2.18257   0.00097   0.01036   0.00000   0.01036   2.19293
   A64        2.04347  -0.00115  -0.01041   0.00000  -0.01041   2.03306
   A65        2.05711   0.00017   0.00005   0.00000   0.00005   2.05717
   A66        2.09063   0.00009   0.00033   0.00000   0.00033   2.09096
   A67        2.07664   0.00020   0.00550   0.00000   0.00550   2.08214
   A68        2.11591  -0.00028  -0.00583   0.00000  -0.00583   2.11009
   A69        2.10986  -0.00026  -0.00137   0.00000  -0.00137   2.10848
   A70        2.07669   0.00006   0.00020   0.00000   0.00020   2.07689
   A71        2.09664   0.00020   0.00117   0.00000   0.00117   2.09781
   A72        2.09734   0.00028   0.00174   0.00000   0.00174   2.09908
   A73        2.08442  -0.00021  -0.00155   0.00000  -0.00155   2.08286
   A74        2.10143  -0.00008  -0.00019   0.00000  -0.00019   2.10124
   A75        2.07823   0.00000   0.00019   0.00000   0.00019   2.07842
   A76        2.10560   0.00005   0.00052   0.00000   0.00052   2.10612
   A77        2.09935  -0.00005  -0.00071   0.00000  -0.00071   2.09864
   A78        2.13320  -0.00028  -0.00095   0.00000  -0.00094   2.13226
   A79        2.06259   0.00016   0.00057   0.00000   0.00057   2.06316
   A80        2.08739   0.00012   0.00038   0.00000   0.00038   2.08776
   A81        1.90322  -0.00001   0.00014   0.00000   0.00014   1.90337
   A82        2.10952  -0.00296   0.05280   0.00000   0.05247   2.16200
   A83        2.04521  -0.01657  -0.08466   0.00000  -0.09618   1.94903
   A84        2.08376   0.00123   0.00558   0.00000   0.00312   2.08688
   A85        2.11775  -0.00241   0.01460   0.00000   0.01445   2.13220
   A86        2.05947  -0.00644  -0.12048   0.00000  -0.12101   1.93845
   A87        2.10583   0.00882   0.10563   0.00000   0.10592   2.21175
   A88        2.08405  -0.00191  -0.00750   0.00000  -0.00713   2.07692
   A89        2.12611   0.00177   0.01146   0.00000   0.01098   2.13709
   A90        2.07301   0.00014  -0.00395   0.00000  -0.00384   2.06917
   A91        2.11968  -0.00035  -0.00109   0.00000  -0.00119   2.11849
   A92        2.06696  -0.00004  -0.00124   0.00000  -0.00119   2.06577
   A93        2.09655   0.00039   0.00233   0.00000   0.00238   2.09893
   A94        2.07938   0.00007   0.00195   0.00000   0.00194   2.08132
   A95        2.10095   0.00004  -0.00052   0.00000  -0.00052   2.10043
   A96        2.10286  -0.00011  -0.00142   0.00000  -0.00142   2.10144
   A97        2.10890   0.00036   0.00131   0.00000   0.00132   2.11021
   A98        2.09211  -0.00016  -0.00016   0.00000  -0.00016   2.09194
   A99        2.08218  -0.00020  -0.00115   0.00000  -0.00115   2.08103
   A100       2.10053  -0.00056  -0.00713   0.00000  -0.00720   2.09333
   A101       2.12066  -0.00024  -0.00068   0.00000  -0.00065   2.12001
   A102       2.06199   0.00081   0.00781   0.00000   0.00785   2.06984
   A103       2.08487   0.00034   0.00892   0.00000   0.00898   2.09385
   A104       2.13491  -0.00039  -0.01636   0.00000  -0.01673   2.11817
   A105       2.06341   0.00005   0.00744   0.00000   0.00775   2.07116
   A106       1.88415   0.00016  -0.02979   0.00000  -0.02997   1.85417
   A107       1.88812  -0.00217  -0.04604   0.00000  -0.04604   1.84208
    D1       -2.46751   0.00126   0.02823   0.00000   0.02823  -2.43927
    D2       -0.42528   0.00148   0.01834   0.00000   0.01835  -0.40693
    D3        1.78092   0.00146   0.03499   0.00000   0.03486   1.81578
    D4       -3.05243  -0.00005  -0.00701   0.00000  -0.00717  -3.05959
    D5        0.10075   0.00000  -0.00679   0.00000  -0.00694   0.09381
    D6        1.13269  -0.00013   0.00389   0.00000   0.00412   1.13680
    D7       -1.99732  -0.00008   0.00412   0.00000   0.00434  -1.99298
    D8       -0.96936   0.00029   0.00575   0.00000   0.00568  -0.96368
    D9        2.18382   0.00034   0.00597   0.00000   0.00590   2.18973
   D10        0.86929   0.00132   0.02040   0.00000   0.02011   0.88940
   D11       -1.16910   0.00081   0.02023   0.00000   0.02015  -1.14895
   D12        3.06493   0.00069   0.01876   0.00000   0.01856   3.08349
   D13        2.95155   0.00159   0.01645   0.00000   0.01635   2.96789
   D14        0.91315   0.00108   0.01629   0.00000   0.01639   0.92954
   D15       -1.13600   0.00096   0.01481   0.00000   0.01480  -1.12120
   D16       -1.31163   0.00099  -0.00141   0.00000  -0.00155  -1.31317
   D17        2.93317   0.00048  -0.00158   0.00000  -0.00151   2.93166
   D18        0.88401   0.00036  -0.00306   0.00000  -0.00310   0.88092
   D19       -1.08691   0.00049   0.00154   0.00000   0.00079  -1.08612
   D20        3.08706   0.00107   0.00957   0.00000   0.00983   3.09688
   D21        1.04537   0.00061   0.01720   0.00000   0.01780   1.06317
   D22        3.12082   0.00029  -0.00238   0.00000  -0.00316   3.11766
   D23        1.01160   0.00087   0.00564   0.00000   0.00588   1.01748
   D24       -1.03008   0.00041   0.01328   0.00000   0.01385  -1.01623
   D25        1.10083   0.00055   0.00996   0.00000   0.00912   1.10995
   D26       -1.00840   0.00113   0.01798   0.00000   0.01817  -0.99023
   D27       -3.05008   0.00067   0.02562   0.00000   0.02614  -3.02394
   D28       -3.13739  -0.00013  -0.00218   0.00000  -0.00219  -3.13958
   D29       -0.01694   0.00005   0.00046   0.00000   0.00047  -0.01647
   D30        0.01655  -0.00011  -0.00205   0.00000  -0.00207   0.01448
   D31        3.13699   0.00008   0.00058   0.00000   0.00059   3.13759
   D32       -0.73786   0.00177   0.02953   0.00000   0.02958  -0.70828
   D33        2.43117   0.00128   0.02134   0.00000   0.02141   2.45258
   D34        1.31739   0.00137   0.02307   0.00000   0.02297   1.34036
   D35       -1.79677   0.00087   0.01488   0.00000   0.01481  -1.78196
   D36       -2.92499   0.00139   0.02181   0.00000   0.02187  -2.90312
   D37        0.24404   0.00089   0.01362   0.00000   0.01371   0.25774
   D38       -1.81852   0.00178   0.04479   0.00000   0.04310  -1.77542
   D39        1.33463  -0.00001   0.04876   0.00000   0.04264   1.37727
   D40        0.65844   0.00671   0.06517   0.00000   0.07208   0.73052
   D41        0.29880   0.00048   0.02519   0.00000   0.02358   0.32238
   D42       -2.83124  -0.00130   0.02916   0.00000   0.02312  -2.80812
   D43        2.77576   0.00542   0.04558   0.00000   0.05256   2.82832
   D44        2.34486  -0.00019   0.00632   0.00000   0.00546   2.35032
   D45       -0.78518  -0.00198   0.01029   0.00000   0.00500  -0.78018
   D46       -1.46136   0.00474   0.02671   0.00000   0.03443  -1.42693
   D47       -0.06955   0.00017   0.00188   0.00000   0.00194  -0.06760
   D48       -3.07903  -0.00097  -0.01163   0.00000  -0.01161  -3.09064
   D49        3.09903  -0.00031  -0.00589   0.00000  -0.00591   3.09312
   D50        0.08955  -0.00145  -0.01940   0.00000  -0.01946   0.07009
   D51       -3.06063  -0.00099  -0.02141   0.00000  -0.02614  -3.08677
   D52        0.09286  -0.00273  -0.01663   0.00000  -0.02584   0.06702
   D53       -3.03978  -0.00111  -0.01421   0.00000  -0.01418  -3.05395
   D54       -0.03727   0.00019   0.00070   0.00000   0.00067  -0.03660
   D55        3.13997  -0.00010  -0.00325   0.00000  -0.00327   3.13670
   D56        0.01964  -0.00017  -0.00501   0.00000  -0.00498   0.01466
   D57        3.13911   0.00027   0.00180   0.00000   0.00179   3.14090
   D58       -0.00170   0.00016  -0.00048   0.00000  -0.00047  -0.00218
   D59       -3.14079  -0.00001  -0.00211   0.00000  -0.00211   3.14029
   D60       -0.00052   0.00002  -0.00180   0.00000  -0.00180  -0.00232
   D61        0.00006   0.00010   0.00004   0.00000   0.00004   0.00010
   D62        3.14033   0.00012   0.00035   0.00000   0.00035   3.14068
   D63        3.14041   0.00002   0.00064   0.00000   0.00064   3.14105
   D64       -0.00140   0.00001   0.00019   0.00000   0.00020  -0.00121
   D65        0.00003   0.00000   0.00035   0.00000   0.00035   0.00037
   D66        3.14140  -0.00001  -0.00010   0.00000  -0.00010   3.14130
   D67       -3.14006  -0.00002  -0.00042   0.00000  -0.00042  -3.14049
   D68        0.00106  -0.00005  -0.00135   0.00000  -0.00135  -0.00029
   D69        0.00019   0.00001  -0.00011   0.00000  -0.00010   0.00008
   D70        3.14132  -0.00003  -0.00103   0.00000  -0.00103   3.14028
   D71       -0.00017   0.00000  -0.00022   0.00000  -0.00022  -0.00039
   D72       -3.14132  -0.00001  -0.00038   0.00000  -0.00038   3.14148
   D73       -3.14154   0.00001   0.00023   0.00000   0.00023  -3.14131
   D74        0.00049  -0.00001   0.00007   0.00000   0.00007   0.00056
   D75        0.00010  -0.00001  -0.00016   0.00000  -0.00016  -0.00006
   D76       -3.14122   0.00000   0.00003   0.00000   0.00003  -3.14119
   D77        3.14125   0.00001   0.00001   0.00000   0.00001   3.14126
   D78       -0.00007   0.00001   0.00019   0.00000   0.00019   0.00012
   D79        0.00011   0.00002   0.00039   0.00000   0.00039   0.00050
   D80       -3.14132   0.00001   0.00034   0.00000   0.00034  -3.14098
   D81        3.14144   0.00001   0.00021   0.00000   0.00021  -3.14154
   D82        0.00001   0.00000   0.00016   0.00000   0.00016   0.00017
   D83       -0.00026  -0.00002  -0.00026   0.00000  -0.00026  -0.00052
   D84       -3.14139   0.00002   0.00067   0.00000   0.00068  -3.14071
   D85        3.14117  -0.00001  -0.00021   0.00000  -0.00021   3.14096
   D86        0.00005   0.00003   0.00072   0.00000   0.00073   0.00078
   D87        3.10535   0.00034   0.00419   0.00000   0.00419   3.10954
   D88       -0.03670   0.00030   0.00327   0.00000   0.00327  -0.03343
   D89        3.13717  -0.00018  -0.00205   0.00000  -0.00206   3.13511
   D90        0.00097  -0.00030  -0.00494   0.00000  -0.00494  -0.00397
   D91       -0.02058   0.00004  -0.00095   0.00000  -0.00095  -0.02153
   D92        3.12980   0.00000  -0.00179   0.00000  -0.00179   3.12801
   D93        3.11589   0.00016   0.00179   0.00000   0.00179   3.11767
   D94       -0.01692   0.00012   0.00095   0.00000   0.00095  -0.01597
   D95       -3.13189  -0.00003  -0.00089   0.00000  -0.00090  -3.13279
   D96        0.01024   0.00001  -0.00041   0.00000  -0.00041   0.00983
   D97        0.00085   0.00001  -0.00010   0.00000  -0.00010   0.00075
   D98       -3.14020   0.00005   0.00038   0.00000   0.00039  -3.13981
   D99        3.13363   0.00003   0.00092   0.00000   0.00091   3.13455
   D100      -0.00452  -0.00002   0.00000   0.00000   0.00000  -0.00452
   D101       0.00018  -0.00001   0.00009   0.00000   0.00009   0.00026
   D102      -3.13798  -0.00006  -0.00083   0.00000  -0.00083  -3.13880
   D103      -0.00101   0.00001   0.00014   0.00000   0.00014  -0.00087
   D104       3.14013   0.00000   0.00015   0.00000   0.00015   3.14027
   D105       3.14003  -0.00004  -0.00035   0.00000  -0.00035   3.13967
   D106      -0.00202  -0.00004  -0.00035   0.00000  -0.00035  -0.00237
   D107      -3.10661  -0.00039  -0.00462   0.00000  -0.00463  -3.11124
   D108       0.03554  -0.00035  -0.00413   0.00000  -0.00413   0.03141
   D109       0.00012  -0.00002  -0.00016   0.00000  -0.00016  -0.00004
   D110       3.14105   0.00001   0.00019   0.00000   0.00019   3.14125
   D111      -3.14101  -0.00002  -0.00016   0.00000  -0.00016  -3.14117
   D112      -0.00008   0.00001   0.00019   0.00000   0.00019   0.00011
   D113       0.00089   0.00002   0.00014   0.00000   0.00014   0.00103
   D114       3.14026   0.00005   0.00061   0.00000   0.00061   3.14087
   D115      -3.14003  -0.00001  -0.00022   0.00000  -0.00022  -3.14025
   D116      -0.00066   0.00002   0.00025   0.00000   0.00025  -0.00041
   D117      -0.00105   0.00000  -0.00010   0.00000  -0.00011  -0.00115
   D118       3.13706   0.00005   0.00082   0.00000   0.00082   3.13788
   D119      -3.14042  -0.00003  -0.00057   0.00000  -0.00057  -3.14100
   D120      -0.00232   0.00002   0.00036   0.00000   0.00036  -0.00196
   D121       0.04951   0.01219   0.06411   0.00000   0.05642   0.10593
   D122      -1.34775  -0.02189  -0.15850   0.00000  -0.15123  -1.49898
   D123      -3.13365   0.00031   0.01415   0.00000   0.01241  -3.12123
   D124      -0.00965  -0.00142  -0.01125   0.00000  -0.00971  -0.01936
   D125      -3.13575  -0.00097  -0.01492   0.00000  -0.01566   3.13177
   D126       0.01234  -0.00113  -0.01710   0.00000  -0.01785  -0.00550
   D127       0.02390   0.00096   0.01177   0.00000   0.01252   0.03642
   D128      -3.11119   0.00080   0.00959   0.00000   0.01034  -3.10085
   D129      -3.13721  -0.00016  -0.00213   0.00000  -0.00211  -3.13932
   D130       0.00441  -0.00013  -0.00165   0.00000  -0.00164   0.00278
   D131      -0.00192   0.00000   0.00005   0.00000   0.00005  -0.00188
   D132       3.13970   0.00003   0.00053   0.00000   0.00052   3.14022
   D133       3.13632   0.00013   0.00174   0.00000   0.00176   3.13808
   D134      -0.00328   0.00009   0.00022   0.00000   0.00024  -0.00304
   D135       0.00120  -0.00002  -0.00041   0.00000  -0.00041   0.00079
   D136      -3.13841  -0.00006  -0.00193   0.00000  -0.00192  -3.14033
   D137       0.00124   0.00004   0.00060   0.00000   0.00060   0.00184
   D138      -3.14071   0.00001   0.00023   0.00000   0.00023  -3.14048
   D139      -3.14039   0.00000   0.00012   0.00000   0.00012  -3.14026
   D140       0.00085  -0.00002  -0.00025   0.00000  -0.00025   0.00060
   D141       0.00019  -0.00005  -0.00089   0.00000  -0.00090  -0.00070
   D142      -3.14136  -0.00003  -0.00048   0.00000  -0.00048   3.14135
   D143      -3.14104  -0.00003  -0.00052   0.00000  -0.00052  -3.14156
   D144       0.00059  -0.00001  -0.00011   0.00000  -0.00010   0.00049
   D145      -0.00090   0.00003   0.00054   0.00000   0.00054  -0.00036
   D146      -3.14159   0.00001   0.00062   0.00000   0.00063  -3.14096
   D147       3.14066   0.00002   0.00012   0.00000   0.00012   3.14078
   D148      -0.00004   0.00000   0.00021   0.00000   0.00021   0.00017
   D149       0.00018   0.00000   0.00012   0.00000   0.00012   0.00030
   D150       3.13987   0.00004   0.00155   0.00000   0.00157   3.14144
   D151       3.14091   0.00002   0.00004   0.00000   0.00003   3.14094
   D152      -0.00259   0.00006   0.00146   0.00000   0.00148  -0.00112
   D153      -0.00811   0.00014  -0.00020   0.00000  -0.00020  -0.00831
   D154       3.13544   0.00010  -0.00171   0.00000  -0.00170   3.13375
         Item               Value     Threshold  Converged?
 Maximum Force            0.070271     0.000450     NO 
 RMS     Force            0.005452     0.000300     NO 
 Maximum Displacement     0.756610     0.001800     NO 
 RMS     Displacement     0.183474     0.001200     NO 
 Predicted change in Energy=-2.664179D-02
 GradGradGradGradGradGradGradGradGradGradGradGradGradGradGradGradGradGrad

 Leave Link  103 at Thu Oct 13 22:51:20 2016, MaxMem= 1342177280 cpu:     143.9
 (Enter /opt/software/g09/l202.exe)
 Stoichiometry    C27H26N6O7
 Framework group  C1[X(C27H26N6O7)]
 Deg. of freedom   192
 Full point group                 C1      NOp   1
 Largest Abelian subgroup         C1      NOp   1
 Largest concise Abelian subgroup C1      NOp   1
                         Standard orientation:                         
 ---------------------------------------------------------------------
 Center     Atomic      Atomic             Coordinates (Angstroms)
 Number     Number       Type             X           Y           Z
 ---------------------------------------------------------------------
      1          8           0       -1.279579   -1.518094    0.907310
      2          6           0       -1.109259   -0.375035    0.075507
      3          6           0       -2.488859    0.122053   -0.432825
      4          6           0       -0.506559    0.811241    0.885443
      5          6           0       -0.295413   -0.725620   -1.222472
      6          8           0       -2.567281    1.046195   -1.234896
      7          6           0        0.735865    0.423997    1.658342
      8          6           0        1.167246   -1.233996   -1.117921
      9          8           0        2.099020   -0.439243   -1.348564
     10          8           0        0.805821   -0.673735    2.248800
     11          7           0        1.769470    1.297092    1.721441
     12          7           0       -3.535568   -0.544951    0.101966
     13          7           0       -4.803540   -0.219308   -0.252708
     14          6           0       -5.640271   -0.968098    0.357618
     15          6           0       -7.095188   -0.899666    0.219187
     16          6           0       -7.836156   -1.823241    0.985487
     17          6           0       -9.226258   -1.869877    0.951870
     18          6           0       -9.920637   -0.973837    0.133501
     19          6           0       -9.218678   -0.048058   -0.636098
     20          6           0       -7.825376   -0.008056   -0.597241
     21          7           0        1.767489    2.487578    1.048882
     22          6           0        2.858323    3.168803    1.122013
     23          6           0        3.090090    4.460103    0.481161
     24          6           0        2.162227    5.155110   -0.341192
     25          6           0        2.517973    6.386760   -0.904616
     26          6           0        3.773309    6.943396   -0.668759
     27          6           0        4.700112    6.275850    0.138384
     28          6           0        4.350955    5.052581    0.698334
     29          8           0        0.939076    4.612218   -0.567912
     30          7           0        1.274164   -2.599637   -0.772098
     31          7           0        2.508594   -3.267041   -0.556527
     32          6           0        3.618208   -2.583811   -0.560111
     33          6           0        4.919129   -3.214797   -0.369590
     34          6           0        6.077648   -2.413404   -0.397561
     35          6           0        7.341376   -2.962790   -0.224430
     36          6           0        7.465924   -4.347045   -0.019379
     37          6           0        6.343851   -5.168299    0.012758
     38          6           0        5.065378   -4.614920   -0.160738
     39          8           0        3.998267   -5.432476   -0.125208
     40          1           0       -0.653509   -1.432151    1.666492
     41          1           0       -1.252993    1.109759    1.631452
     42          1           0       -0.318640    1.670047    0.245171
     43          1           0       -0.258241    0.191312   -1.809891
     44          1           0       -0.856452   -1.478962   -1.779084
     45          1           0        2.603278    0.972492    2.215134
     46          1           0       -3.321335   -1.301281    0.759558
     47          1           0       -5.284755   -1.744266    1.054380
     48          1           0       -9.760895   -2.595078    1.555959
     49          1           0      -11.005141   -0.990540    0.090609
     50          1           0       -9.752350    0.651030   -1.273391
     51          1           0        3.708959    2.786734    1.698964
     52          1           0        1.798691    6.906429   -1.532459
     53          1           0        4.024174    7.899451   -1.117845
     54          1           0        5.679561    6.702906    0.325817
     55          1           0        5.065686    4.524714    1.324083
     56          1           0        0.441480    5.191474   -1.164841
     57          1           0        0.879148   -2.204870    0.130563
     58          1           0        3.425830   -1.515512   -0.762281
     59          1           0        5.962399   -1.344821   -0.558558
     60          1           0        8.222104   -2.329838   -0.248035
     61          1           0        8.449554   -4.787212    0.116921
     62          1           0        6.429505   -6.239201    0.171181
     63          1           0        3.201159   -4.854744   -0.258604
     64          8           0       -7.159386    0.888956   -1.342309
     65          1           0       -7.840657    1.371534   -1.839608
     66          1           0       -7.288068   -2.522174    1.623819
 ---------------------------------------------------------------------
 Rotational constants (GHZ):      0.0856267      0.0386867      0.0279823
 Leave Link  202 at Thu Oct 13 22:51:20 2016, MaxMem= 1342177280 cpu:       0.5
 (Enter /opt/software/g09/l301.exe)
 Basis read from rwf:  (5D, 7F)
 Pseudo-potential data read from rwf file.
 There are   690 symmetry adapted basis functions of A   symmetry.
 Integral buffers will be    131072 words long.
 Raffenetti 2 integral format.
 Two-electron integral symmetry is turned on.
   690 basis functions,  1302 primitive gaussians,   730 cartesian basis functions
   143 alpha electrons      143 beta electrons
       nuclear repulsion energy      4154.1647780121 Hartrees.
 IExCor=  402 DFT=T Ex+Corr=B3LYP ExCW=0 ScaHFX=  0.200000
 ScaDFX=  0.800000  0.720000  1.000000  0.810000 ScalE2=  1.000000  1.000000
 IRadAn=      0 IRanWt=     -1 IRanGd=            0 ICorTp=0
 NAtoms=   66 NActive=   66 NUniq=   66 SFac= 1.00D+00 NAtFMM=   50 NAOKFM=T Big=T
 No density basis found on file   724.
 ------------------------------------------------------------------------------
 Polarizable Continuum Model (PCM)
 =================================
 Model                : PCM.
 Atomic radii         : UFF (Universal Force Field).
 Polarization charges : Total charges.
 Charge compensation  : None.
 Solution method      : Matrix inversion.
 Cavity type          : Scaled VdW (van der Waals Surface) (Alpha=1.100).
 Cavity algorithm     : GePol (No added spheres)
                        Default sphere list used, NSphG=   66.
                        Lebedev-Laikov grids with approx.  5.0 points / Ang**2.
                        Smoothing algorithm: Karplus/York (Gamma=1.0000).
                        Polarization charges: spherical gaussians, with
                                              point-specific exponents (IZeta= 3).
                        Self-potential: point-specific (ISelfS= 7).
                        Self-field    : sphere-specific E.n sum rule (ISelfD= 2).
 1st derivatives      : Analytical E(r).r(x)/FMM algorithm (CHGder, D1EAlg=3).
                        Cavity 1st derivative terms included.
 Solvent              : Water, Eps=  78.355300 Eps(inf)=   1.777849
 ------------------------------------------------------------------------------
 GePol: Number of generator spheres                  =      66
 GePol: Total number of spheres                      =      66
 GePol: Number of exposed spheres                    =      66 (100.00%)
 GePol: Number of points                             =    4947
 GePol: Average weight of points                     =       0.13
 GePol: Minimum weight of points                     =   0.44D-10
 GePol: Maximum weight of points                     =    0.20577
 GePol: Number of points with low weight             =     313
 GePol: Fraction of low-weight points (<1% of avg)   =       6.33%
 GePol: Cavity surface area                          =    639.385 Ang**2
 GePol: Cavity volume                                =    710.113 Ang**3
 Leave Link  301 at Thu Oct 13 22:51:20 2016, MaxMem= 1342177280 cpu:       1.9
 (Enter /opt/software/g09/linda-exe/l302.exel)
 NPDir=0 NMtPBC=     1 NCelOv=     1 NCel=       1 NClECP=     1 NCelD=      1
         NCelK=      1 NCelE2=     1 NClLst=     1 CellRange=     0.0.
 One-electron integrals computed using PRISM.
   1 Symmetry operations used in ECPInt.
 ECPInt:  NShTT=   28441 NPrTT=  163533 LenC2=   15716 LenP2D=   48198.
 LDataN:  DoStor=T MaxTD1= 4 Len=   56
 NBasis=   690 RedAO= T  NBF=   690
 NBsUse=   690 1.00D-06 NBFU=   690
 Precomputing XC quadrature grid using
 IXCGrd= 2 IRadAn=           0 IRanWt=          -1 IRanGd=           0 AccXCQ= 0.00D+00.
 NRdTot=    4292 NPtTot=      549392 NUsed=      580307 NTot=      580339
 NSgBfM=   596   600   606   607   607 NAtAll=    66    66.
 Leave Link  302 at Thu Oct 13 22:51:25 2016, MaxMem= 1342177280 cpu:      89.0
 (Enter /opt/software/g09/l303.exe)
 DipDrv:  MaxL=1.
 Leave Link  303 at Thu Oct 13 22:51:25 2016, MaxMem= 1342177280 cpu:       3.8
 (Enter /opt/software/g09/linda-exe/l401.exel)
 Initial guess read from the read-write file.
 B after Tr=     0.000000    0.000000    0.000000
         Rot=    1.000000    0.000000    0.000000    0.000000 Ang=   0.00 deg.
 Guess basis will be translated and rotated to current coordinates.
 Initial guess orbital symmetries:
 Alpha Orbitals:
       Occupied  (A) (A) (A) (A) (A) (A) (A) (A) (A) (A) (A) (A)
                 (A) (A) (A) (A) (A) (A) (A) (A) (A) (A) (A) (A)
                 (A) (A) (A) (A) (A) (A) (A) (A) (A) (A) (A) (A)
                 (A) (A) (A) (A) (A) (A) (A) (A) (A) (A) (A) (A)
                 (A) (A) (A) (A) (A) (A) (A) (A) (A) (A) (A) (A)
                 (A) (A) (A) (A) (A) (A) (A) (A) (A) (A) (A) (A)
                 (A) (A) (A) (A) (A) (A) (A) (A) (A) (A) (A) (A)
                 (A) (A) (A) (A) (A) (A) (A) (A) (A) (A) (A) (A)
                 (A) (A) (A) (A) (A) (A) (A) (A) (A) (A) (A) (A)
                 (A) (A) (A) (A) (A) (A) (A) (A) (A) (A) (A) (A)
                 (A) (A) (A) (A) (A) (A) (A) (A) (A) (A) (A) (A)
                 (A) (A) (A) (A) (A) (A) (A) (A) (A) (A) (A)
       Virtual   (A) (A) (A) (A) (A) (A) (A) (A) (A) (A) (A) (A)
                 (A) (A) (A) (A) (A) (A) (A) (A) (A) (A) (A) (A)
                 (A) (A) (A) (A) (A) (A) (A) (A) (A) (A) (A) (A)
                 (A) (A) (A) (A) (A) (A) (A) (A) (A) (A) (A) (A)
                 (A) (A) (A) (A) (A) (A) (A) (A) (A) (A) (A) (A)
                 (A) (A) (A) (A) (A) (A) (A) (A) (A) (A) (A) (A)
                 (A) (A) (A) (A) (A) (A) (A) (A) (A) (A) (A) (A)
                 (A) (A) (A) (A) (A) (A) (A) (A) (A) (A) (A) (A)
                 (A) (A) (A) (A) (A) (A) (A) (A) (A) (A) (A) (A)
                 (A) (A) (A) (A) (A) (A) (A) (A) (A) (A) (A) (A)
                 (A) (A) (A) (A) (A) (A) (A) (A) (A) (A) (A) (A)
                 (A) (A) (A) (A) (A) (A) (A) (A) (A) (A) (A) (A)
                 (A) (A) (A) (A) (A) (A) (A) (A) (A) (A) (A) (A)
                 (A) (A) (A) (A) (A) (A) (A) (A) (A) (A) (A) (A)
                 (A) (A) (A) (A) (A) (A) (A) (A) (A) (A) (A) (A)
                 (A) (A) (A) (A) (A) (A) (A) (A) (A) (A) (A) (A)
                 (A) (A) (A) (A) (A) (A) (A) (A) (A) (A) (A) (A)
                 (A) (A) (A) (A) (A) (A) (A) (A) (A) (A) (A) (A)
                 (A) (A) (A) (A) (A) (A) (A) (A) (A) (A) (A) (A)
                 (A) (A) (A) (A) (A) (A) (A) (A) (A) (A) (A) (A)
                 (A) (A) (A) (A) (A) (A) (A) (A) (A) (A) (A) (A)
                 (A) (A) (A) (A) (A) (A) (A) (A) (A) (A) (A) (A)
                 (A) (A) (A) (A) (A) (A) (A) (A) (A) (A) (A) (A)
                 (A) (A) (A) (A) (A) (A) (A) (A) (A) (A) (A) (A)
                 (A) (A) (A) (A) (A) (A) (A) (A) (A) (A) (A) (A)
                 (A) (A) (A) (A) (A) (A) (A) (A) (A) (A) (A) (A)
                 (A) (A) (A) (A) (A) (A) (A) (A) (A) (A) (A) (A)
                 (A) (A) (A) (A) (A) (A) (A) (A) (A) (A) (A) (A)
                 (A) (A) (A) (A) (A) (A) (A) (A) (A) (A) (A) (A)
                 (A) (A) (A) (A) (A) (A) (A) (A) (A) (A) (A) (A)
                 (A) (A) (A) (A) (A) (A) (A) (A) (A) (A) (A) (A)
                 (A) (A) (A) (A) (A) (A) (A) (A) (A) (A) (A) (A)
                 (A) (A) (A) (A) (A) (A) (A) (A) (A) (A) (A) (A)
                 (A) (A) (A) (A) (A) (A) (A) (A) (A) (A) (A) (A)
                 (A) (A) (A) (A) (A) (A) (A) (A) (A) (A) (A) (A)
                 (A) (A) (A) (A) (A) (A) (A) (A) (A) (A) (A) (A)
                 (A) (A) (A) (A) (A) (A) (A) (A) (A) (A) (A) (A)
                 (A) (A) (A) (A) (A) (A) (A) (A) (A) (A) (A) (A)
                 (A) (A) (A) (A) (A) (A) (A) (A) (A) (A) (A) (A)
                 (A) (A) (A) (A) (A) (A) (A) (A) (A) (A) (A) (A)
                 (A) (A) (A) (A) (A) (A) (A) (A) (A) (A) (A) (A)
                 (A) (A) (A) (A) (A) (A) (A) (A) (A) (A) (A) (A)
                 (A) (A) (A) (A) (A) (A) (A) (A) (A) (A) (A) (A)
                 (A) (A) (A) (A) (A) (A) (A) (A) (A) (A) (A) (A)
                 (A) (A) (A) (A) (A) (A) (A) (A) (A) (A) (A) (A)
                 (A) (A) (A) (A) (A) (A) (A)
 Beta  Orbitals:
       Occupied  (A) (A) (A) (A) (A) (A) (A) (A) (A) (A) (A) (A)
                 (A) (A) (A) (A) (A) (A) (A) (A) (A) (A) (A) (A)
                 (A) (A) (A) (A) (A) (A) (A) (A) (A) (A) (A) (A)
                 (A) (A) (A) (A) (A) (A) (A) (A) (A) (A) (A) (A)
                 (A) (A) (A) (A) (A) (A) (A) (A) (A) (A) (A) (A)
                 (A) (A) (A) (A) (A) (A) (A) (A) (A) (A) (A) (A)
                 (A) (A) (A) (A) (A) (A) (A) (A) (A) (A) (A) (A)
                 (A) (A) (A) (A) (A) (A) (A) (A) (A) (A) (A) (A)
                 (A) (A) (A) (A) (A) (A) (A) (A) (A) (A) (A) (A)
                 (A) (A) (A) (A) (A) (A) (A) (A) (A) (A) (A) (A)
                 (A) (A) (A) (A) (A) (A) (A) (A) (A) (A) (A) (A)
                 (A) (A) (A) (A) (A) (A) (A) (A) (A) (A) (A)
       Virtual   (A) (A) (A) (A) (A) (A) (A) (A) (A) (A) (A) (A)
                 (A) (A) (A) (A) (A) (A) (A) (A) (A) (A) (A) (A)
                 (A) (A) (A) (A) (A) (A) (A) (A) (A) (A) (A) (A)
                 (A) (A) (A) (A) (A) (A) (A) (A) (A) (A) (A) (A)
                 (A) (A) (A) (A) (A) (A) (A) (A) (A) (A) (A) (A)
                 (A) (A) (A) (A) (A) (A) (A) (A) (A) (A) (A) (A)
                 (A) (A) (A) (A) (A) (A) (A) (A) (A) (A) (A) (A)
                 (A) (A) (A) (A) (A) (A) (A) (A) (A) (A) (A) (A)
                 (A) (A) (A) (A) (A) (A) (A) (A) (A) (A) (A) (A)
                 (A) (A) (A) (A) (A) (A) (A) (A) (A) (A) (A) (A)
                 (A) (A) (A) (A) (A) (A) (A) (A) (A) (A) (A) (A)
                 (A) (A) (A) (A) (A) (A) (A) (A) (A) (A) (A) (A)
                 (A) (A) (A) (A) (A) (A) (A) (A) (A) (A) (A) (A)
                 (A) (A) (A) (A) (A) (A) (A) (A) (A) (A) (A) (A)
                 (A) (A) (A) (A) (A) (A) (A) (A) (A) (A) (A) (A)
                 (A) (A) (A) (A) (A) (A) (A) (A) (A) (A) (A) (A)
                 (A) (A) (A) (A) (A) (A) (A) (A) (A) (A) (A) (A)
                 (A) (A) (A) (A) (A) (A) (A) (A) (A) (A) (A) (A)
                 (A) (A) (A) (A) (A) (A) (A) (A) (A) (A) (A) (A)
                 (A) (A) (A) (A) (A) (A) (A) (A) (A) (A) (A) (A)
                 (A) (A) (A) (A) (A) (A) (A) (A) (A) (A) (A) (A)
                 (A) (A) (A) (A) (A) (A) (A) (A) (A) (A) (A) (A)
                 (A) (A) (A) (A) (A) (A) (A) (A) (A) (A) (A) (A)
                 (A) (A) (A) (A) (A) (A) (A) (A) (A) (A) (A) (A)
                 (A) (A) (A) (A) (A) (A) (A) (A) (A) (A) (A) (A)
                 (A) (A) (A) (A) (A) (A) (A) (A) (A) (A) (A) (A)
                 (A) (A) (A) (A) (A) (A) (A) (A) (A) (A) (A) (A)
                 (A) (A) (A) (A) (A) (A) (A) (A) (A) (A) (A) (A)
                 (A) (A) (A) (A) (A) (A) (A) (A) (A) (A) (A) (A)
                 (A) (A) (A) (A) (A) (A) (A) (A) (A) (A) (A) (A)
                 (A) (A) (A) (A) (A) (A) (A) (A) (A) (A) (A) (A)
                 (A) (A) (A) (A) (A) (A) (A) (A) (A) (A) (A) (A)
                 (A) (A) (A) (A) (A) (A) (A) (A) (A) (A) (A) (A)
                 (A) (A) (A) (A) (A) (A) (A) (A) (A) (A) (A) (A)
                 (A) (A) (A) (A) (A) (A) (A) (A) (A) (A) (A) (A)
                 (A) (A) (A) (A) (A) (A) (A) (A) (A) (A) (A) (A)
                 (A) (A) (A) (A) (A) (A) (A) (A) (A) (A) (A) (A)
                 (A) (A) (A) (A) (A) (A) (A) (A) (A) (A) (A) (A)
                 (A) (A) (A) (A) (A) (A) (A) (A) (A) (A) (A) (A)
                 (A) (A) (A) (A) (A) (A) (A) (A) (A) (A) (A) (A)
                 (A) (A) (A) (A) (A) (A) (A) (A) (A) (A) (A) (A)
                 (A) (A) (A) (A) (A) (A) (A) (A) (A) (A) (A) (A)
                 (A) (A) (A) (A) (A) (A) (A) (A) (A) (A) (A) (A)
                 (A) (A) (A) (A) (A) (A) (A) (A) (A) (A) (A) (A)
                 (A) (A) (A) (A) (A) (A) (A) (A) (A) (A) (A) (A)
                 (A) (A) (A) (A) (A) (A) (A)
 The electronic state of the initial guess is 1-A.
 Initial guess <Sx>= 0.0000 <Sy>= 0.0000 <Sz>= 0.0000 <S**2>= 0.0000 S= 0.0000
 Generating alternative initial guess.
 Harris functional with IExCor=  402 diagonalized for initial guess.
 ExpMin= 1.61D-01 ExpMax= 5.48D+03 ExpMxC= 8.25D+02 IAcc=1 IRadAn=         1 AccDes= 0.00D+00
 HarFok:  IExCor=  402 AccDes= 0.00D+00 IRadAn=         1 IDoV= 1
 ScaDFX=  1.000000  1.000000  1.000000  1.000000
 FoFCou: FMM=F IPFlag=           0 FMFlag=      100000 FMFlg1=        2001
         NFxFlg=           0 DoJE=T BraDBF=F KetDBF=T FulRan=T
         Omega=  0.000000  0.000000  1.000000  0.000000  0.000000 ICntrl=     500 IOpCl=  0
         NMat0=    1 NMatS0=    1 NMatT0=    0 NMatD0=    1 NMtDS0=    0 NMtDT0=    0
         I1Cent=           4 NGrid=           0.
 Petite list used in FoFCou.
 Harris En= -1899.35304933571    
 Leave Link  401 at Thu Oct 13 22:51:38 2016, MaxMem= 1342177280 cpu:     225.1
 (Enter /opt/software/g09/linda-exe/l502.exel)
 UHF open shell SCF:
 Requested convergence on RMS density matrix=1.00D-08 within 128 cycles.
 Requested convergence on MAX density matrix=1.00D-06.
 Requested convergence on             energy=1.00D-06.
 No special actions if energy rises.
 Using DIIS extrapolation, IDIIS=  1040.
 Integral symmetry usage will be decided dynamically.
       579700 words used for storage of precomputed grid.
 IEnd=     2216586 IEndB=     2216586 NGot=  1342177280 MDV=  1340510965
 LenX=  1340510965 LenY=  1339977335
 Fock matrices will be formed incrementally for  20 cycles.

 Cycle   1  Pass 1  IDiag  1:
 FoFCou: FMM=T IPFlag=           0 FMFlag=      100000 FMFlg1=        2001
         NFxFlg=           0 DoJE=F BraDBF=F KetDBF=F FulRan=T
         Omega=  0.000000  0.000000  1.000000  0.000000  0.000000 ICntrl=       0 IOpCl=  1
         NMat0=    1 NMatS0=    1 NMatT0=    0 NMatD0=    1 NMtDS0=    0 NMtDT0=    0
         I1Cent=           0 NGrid=           0.
 Symmetry not used in FoFCou.
 FMM levels:  10  Number of levels for PrismC:   9
 E= -1899.42696729161    
 DIIS: error= 6.09D-03 at cycle   1 NSaved=   1.
 NSaved= 1 IEnMin= 1 EnMin= -1899.42696729161     IErMin= 1 ErrMin= 6.09D-03
 ErrMax= 6.09D-03 EMaxC= 1.00D-01 BMatC= 2.47D-01 BMatP= 2.47D-01
 IDIUse=3 WtCom= 9.39D-01 WtEn= 6.09D-02
 Coeff-Com:  0.100D+01
 Coeff-En:   0.100D+01
 Coeff:      0.100D+01
 Gap=     0.213 Goal=   None    Shift=    0.000
 Gap=     0.213 Goal=   None    Shift=    0.000
 GapD=    0.213 DampG=1.000 DampE=1.000 DampFc=1.0000 IDamp=-1.
 RMSDP=5.86D-04 MaxDP=2.67D-02              OVMax= 3.75D-02

 Cycle   2  Pass 1  IDiag  1:
 RMSU=  4.14D-04    CP:  9.97D-01
 E= -1899.52564717237     Delta-E=       -0.098679880757 Rises=F Damp=F
 DIIS: error= 8.41D-04 at cycle   2 NSaved=   2.
 NSaved= 2 IEnMin= 2 EnMin= -1899.52564717237     IErMin= 2 ErrMin= 8.41D-04
 ErrMax= 8.41D-04 EMaxC= 1.00D-01 BMatC= 7.04D-03 BMatP= 2.47D-01
 IDIUse=3 WtCom= 9.92D-01 WtEn= 8.41D-03
 Coeff-Com: -0.253D-01 0.103D+01
 Coeff-En:   0.000D+00 0.100D+01
 Coeff:     -0.251D-01 0.103D+01
 Gap=     0.153 Goal=   None    Shift=    0.000
 Gap=     0.153 Goal=   None    Shift=    0.000
 RMSDP=1.48D-04 MaxDP=1.16D-02 DE=-9.87D-02 OVMax= 1.57D-02

 Cycle   3  Pass 1  IDiag  1:
 RMSU=  1.03D-04    CP:  9.97D-01  1.04D+00
 E= -1899.52438674514     Delta-E=        0.001260427230 Rises=F Damp=F
 DIIS: error= 1.91D-03 at cycle   3 NSaved=   3.
 NSaved= 3 IEnMin= 2 EnMin= -1899.52564717237     IErMin= 2 ErrMin= 8.41D-04
 ErrMax= 1.91D-03 EMaxC= 1.00D-01 BMatC= 1.56D-02 BMatP= 7.04D-03
 IDIUse=3 WtCom= 1.86D-01 WtEn= 8.14D-01
 Coeff-Com: -0.414D-01 0.640D+00 0.401D+00
 Coeff-En:   0.000D+00 0.620D+00 0.380D+00
 Coeff:     -0.771D-02 0.624D+00 0.384D+00
 Gap=     0.155 Goal=   None    Shift=    0.000
 Gap=     0.155 Goal=   None    Shift=    0.000
 RMSDP=9.37D-05 MaxDP=8.57D-03 DE= 1.26D-03 OVMax= 1.28D-02

 Cycle   4  Pass 1  IDiag  1:
 RMSU=  2.72D-05    CP:  9.97D-01  1.07D+00  4.27D-01
 E= -1899.52780380561     Delta-E=       -0.003417060474 Rises=F Damp=F
 DIIS: error= 4.03D-04 at cycle   4 NSaved=   4.
 NSaved= 4 IEnMin= 4 EnMin= -1899.52780380561     IErMin= 4 ErrMin= 4.03D-04
 ErrMax= 4.03D-04 EMaxC= 1.00D-01 BMatC= 4.66D-04 BMatP= 7.04D-03
 IDIUse=3 WtCom= 9.96D-01 WtEn= 4.03D-03
 Coeff-Com: -0.182D-01 0.226D+00 0.201D+00 0.592D+00
 Coeff-En:   0.000D+00 0.000D+00 0.000D+00 0.100D+01
 Coeff:     -0.181D-01 0.225D+00 0.200D+00 0.593D+00
 Gap=     0.155 Goal=   None    Shift=    0.000
 Gap=     0.155 Goal=   None    Shift=    0.000
 RMSDP=1.97D-05 MaxDP=1.78D-03 DE=-3.42D-03 OVMax= 2.58D-03

 Cycle   5  Pass 1  IDiag  1:
 RMSU=  1.13D-05    CP:  9.97D-01  1.07D+00  4.61D-01  7.50D-01
 E= -1899.52789106300     Delta-E=       -0.000087257391 Rises=F Damp=F
 DIIS: error= 1.48D-04 at cycle   5 NSaved=   5.
 NSaved= 5 IEnMin= 5 EnMin= -1899.52789106300     IErMin= 5 ErrMin= 1.48D-04
 ErrMax= 1.48D-04 EMaxC= 1.00D-01 BMatC= 9.84D-05 BMatP= 4.66D-04
 IDIUse=3 WtCom= 9.99D-01 WtEn= 1.48D-03
 Coeff-Com: -0.354D-02 0.241D-01 0.517D-01 0.357D+00 0.571D+00
 Coeff-En:   0.000D+00 0.000D+00 0.000D+00 0.147D+00 0.853D+00
 Coeff:     -0.354D-02 0.241D-01 0.516D-01 0.357D+00 0.571D+00
 Gap=     0.155 Goal=   None    Shift=    0.000
 Gap=     0.155 Goal=   None    Shift=    0.000
 RMSDP=7.87D-06 MaxDP=6.82D-04 DE=-8.73D-05 OVMax= 8.22D-04

 Cycle   6  Pass 1  IDiag  1:
 RMSU=  3.33D-06    CP:  9.97D-01  1.07D+00  4.75D-01  8.34D-01  6.87D-01
 E= -1899.52791195353     Delta-E=       -0.000020890523 Rises=F Damp=F
 DIIS: error= 3.99D-05 at cycle   6 NSaved=   6.
 NSaved= 6 IEnMin= 6 EnMin= -1899.52791195353     IErMin= 6 ErrMin= 3.99D-05
 ErrMax= 3.99D-05 EMaxC= 1.00D-01 BMatC= 9.40D-06 BMatP= 9.84D-05
 IDIUse=1 WtCom= 1.00D+00 WtEn= 0.00D+00
 Coeff-Com: -0.148D-03-0.998D-02 0.827D-02 0.141D+00 0.316D+00 0.545D+00
 Coeff:     -0.148D-03-0.998D-02 0.827D-02 0.141D+00 0.316D+00 0.545D+00
 Gap=     0.155 Goal=   None    Shift=    0.000
 Gap=     0.155 Goal=   None    Shift=    0.000
 RMSDP=2.58D-06 MaxDP=1.72D-04 DE=-2.09D-05 OVMax= 2.67D-04

 Cycle   7  Pass 1  IDiag  1:
 RMSU=  1.14D-06    CP:  9.97D-01  1.07D+00  4.77D-01  8.49D-01  7.16D-01
                    CP:  6.07D-01
 E= -1899.52791381432     Delta-E=       -0.000001860797 Rises=F Damp=F
 DIIS: error= 1.54D-05 at cycle   7 NSaved=   7.
 NSaved= 7 IEnMin= 7 EnMin= -1899.52791381432     IErMin= 7 ErrMin= 1.54D-05
 ErrMax= 1.54D-05 EMaxC= 1.00D-01 BMatC= 1.16D-06 BMatP= 9.40D-06
 IDIUse=1 WtCom= 1.00D+00 WtEn= 0.00D+00
 Coeff-Com:  0.378D-03-0.935D-02-0.254D-02 0.320D-01 0.104D+00 0.308D+00
 Coeff-Com:  0.568D+00
 Coeff:      0.378D-03-0.935D-02-0.254D-02 0.320D-01 0.104D+00 0.308D+00
 Coeff:      0.568D+00
 Gap=     0.155 Goal=   None    Shift=    0.000
 Gap=     0.155 Goal=   None    Shift=    0.000
 RMSDP=8.46D-07 MaxDP=8.18D-05 DE=-1.86D-06 OVMax= 1.00D-04

 Cycle   8  Pass 1  IDiag  1:
 RMSU=  3.91D-07    CP:  9.97D-01  1.07D+00  4.77D-01  8.51D-01  7.24D-01
                    CP:  6.77D-01  6.74D-01
 E= -1899.52791404725     Delta-E=       -0.000000232926 Rises=F Damp=F
 DIIS: error= 5.77D-06 at cycle   8 NSaved=   8.
 NSaved= 8 IEnMin= 8 EnMin= -1899.52791404725     IErMin= 8 ErrMin= 5.77D-06
 ErrMax= 5.77D-06 EMaxC= 1.00D-01 BMatC= 1.31D-07 BMatP= 1.16D-06
 IDIUse=1 WtCom= 1.00D+00 WtEn= 0.00D+00
 Coeff-Com:  0.223D-03-0.456D-02-0.214D-02 0.683D-02 0.333D-01 0.133D+00
 Coeff-Com:  0.329D+00 0.504D+00
 Coeff:      0.223D-03-0.456D-02-0.214D-02 0.683D-02 0.333D-01 0.133D+00
 Coeff:      0.329D+00 0.504D+00
 Gap=     0.155 Goal=   None    Shift=    0.000
 Gap=     0.155 Goal=   None    Shift=    0.000
 RMSDP=2.86D-07 MaxDP=3.04D-05 DE=-2.33D-07 OVMax= 3.94D-05

 Cycle   9  Pass 1  IDiag  1:
 RMSU=  1.34D-07    CP:  9.97D-01  1.07D+00  4.77D-01  8.52D-01  7.27D-01
                    CP:  6.80D-01  7.11D-01  6.42D-01
 E= -1899.52791407529     Delta-E=       -0.000000028039 Rises=F Damp=F
 DIIS: error= 1.33D-06 at cycle   9 NSaved=   9.
 NSaved= 9 IEnMin= 9 EnMin= -1899.52791407529     IErMin= 9 ErrMin= 1.33D-06
 ErrMax= 1.33D-06 EMaxC= 1.00D-01 BMatC= 8.77D-09 BMatP= 1.31D-07
 IDIUse=1 WtCom= 1.00D+00 WtEn= 0.00D+00
 Coeff-Com:  0.556D-04-0.885D-03-0.669D-03-0.116D-02 0.141D-02 0.208D-01
 Coeff-Com:  0.780D-01 0.240D+00 0.663D+00
 Coeff:      0.556D-04-0.885D-03-0.669D-03-0.116D-02 0.141D-02 0.208D-01
 Coeff:      0.780D-01 0.240D+00 0.663D+00
 Gap=     0.155 Goal=   None    Shift=    0.000
 Gap=     0.155 Goal=   None    Shift=    0.000
 RMSDP=8.74D-08 MaxDP=7.04D-06 DE=-2.80D-08 OVMax= 1.22D-05

 Cycle  10  Pass 1  IDiag  1:
 RMSU=  4.52D-08    CP:  9.97D-01  1.07D+00  4.77D-01  8.52D-01  7.27D-01
                    CP:  6.83D-01  7.19D-01  7.03D-01  7.72D-01
 E= -1899.52791407707     Delta-E=       -0.000000001779 Rises=F Damp=F
 DIIS: error= 4.41D-07 at cycle  10 NSaved=  10.
 NSaved=10 IEnMin=10 EnMin= -1899.52791407707     IErMin=10 ErrMin= 4.41D-07
 ErrMax= 4.41D-07 EMaxC= 1.00D-01 BMatC= 1.47D-09 BMatP= 8.77D-09
 IDIUse=1 WtCom= 1.00D+00 WtEn= 0.00D+00
 Coeff-Com:  0.668D-05 0.110D-04-0.121D-03-0.125D-02-0.262D-02-0.270D-02
 Coeff-Com:  0.733D-02 0.760D-01 0.360D+00 0.563D+00
 Coeff:      0.668D-05 0.110D-04-0.121D-03-0.125D-02-0.262D-02-0.270D-02
 Coeff:      0.733D-02 0.760D-01 0.360D+00 0.563D+00
 Gap=     0.155 Goal=   None    Shift=    0.000
 Gap=     0.155 Goal=   None    Shift=    0.000
 RMSDP=3.17D-08 MaxDP=2.78D-06 DE=-1.78D-09 OVMax= 4.65D-06

 Cycle  11  Pass 1  IDiag  1:
 RMSU=  1.37D-08    CP:  9.97D-01  1.07D+00  4.77D-01  8.52D-01  7.27D-01
                    CP:  6.83D-01  7.22D-01  7.09D-01  8.42D-01  6.84D-01
 E= -1899.52791407739     Delta-E=       -0.000000000320 Rises=F Damp=F
 DIIS: error= 1.80D-07 at cycle  11 NSaved=  11.
 NSaved=11 IEnMin=11 EnMin= -1899.52791407739     IErMin=11 ErrMin= 1.80D-07
 ErrMax= 1.80D-07 EMaxC= 1.00D-01 BMatC= 1.81D-10 BMatP= 1.47D-09
 IDIUse=1 WtCom= 1.00D+00 WtEn= 0.00D+00
 Coeff-Com: -0.131D-05 0.926D-04-0.392D-05-0.620D-03-0.167D-02-0.368D-02
 Coeff-Com: -0.351D-02 0.206D-01 0.142D+00 0.325D+00 0.522D+00
 Coeff:     -0.131D-05 0.926D-04-0.392D-05-0.620D-03-0.167D-02-0.368D-02
 Coeff:     -0.351D-02 0.206D-01 0.142D+00 0.325D+00 0.522D+00
 Gap=     0.155 Goal=   None    Shift=    0.000
 Gap=     0.155 Goal=   None    Shift=    0.000
 RMSDP=1.04D-08 MaxDP=9.09D-07 DE=-3.20D-10 OVMax= 1.11D-06

 Cycle  12  Pass 1  IDiag  1:
 RMSU=  4.79D-09    CP:  9.97D-01  1.07D+00  4.77D-01  8.52D-01  7.27D-01
                    CP:  6.83D-01  7.23D-01  7.13D-01  8.46D-01  7.24D-01
                    CP:  6.41D-01
 E= -1899.52791407748     Delta-E=       -0.000000000095 Rises=F Damp=F
 DIIS: error= 9.26D-08 at cycle  12 NSaved=  12.
 NSaved=12 IEnMin=12 EnMin= -1899.52791407748     IErMin=12 ErrMin= 9.26D-08
 ErrMax= 9.26D-08 EMaxC= 1.00D-01 BMatC= 1.94D-11 BMatP= 1.81D-10
 IDIUse=1 WtCom= 1.00D+00 WtEn= 0.00D+00
 Coeff-Com: -0.169D-05 0.538D-04 0.148D-04-0.209D-03-0.650D-03-0.182D-02
 Coeff-Com: -0.297D-02 0.279D-02 0.374D-01 0.120D+00 0.296D+00 0.549D+00
 Coeff:     -0.169D-05 0.538D-04 0.148D-04-0.209D-03-0.650D-03-0.182D-02
 Coeff:     -0.297D-02 0.279D-02 0.374D-01 0.120D+00 0.296D+00 0.549D+00
 Gap=     0.155 Goal=   None    Shift=    0.000
 Gap=     0.155 Goal=   None    Shift=    0.000
 RMSDP=3.71D-09 MaxDP=3.90D-07 DE=-9.46D-11 OVMax= 4.39D-07

 Error on total polarization charges =  0.01290
 SCF Done:  E(UB3LYP) =  -1899.52791408     A.U. after   12 cycles
             Convg  =    0.3711D-08             -V/T =  2.0067
 <Sx>= 0.0000 <Sy>= 0.0000 <Sz>= 0.0000 <S**2>= 0.0000 S= 0.0000
 <L.S>= 0.000000000000E+00
 KE= 1.886831559775D+03 PE=-1.274242441291D+04 EE= 4.801900161047D+03
 Annihilation of the first spin contaminant:
 S**2 before annihilation     0.0000,   after     0.0000
 Leave Link  502 at Thu Oct 13 22:58:05 2016, MaxMem= 1342177280 cpu:    7285.1
 (Enter /opt/software/g09/linda-exe/l701.exel)
 Compute integral first derivatives.
 ... and contract with generalized density number  0.
   1 Symmetry operations used in ECPInt.
 ECPInt:  NShTT=   28441 NPrTT=  163533 LenC2=   15716 LenP2D=   48198.
 LDataN:  DoStor=T MaxTD1= 5 Len=  102
 D1PCM: PCM CHGder 1st derivatives, ID1Alg=3 FixD1E=F DoIter=F DoCFld=F I1PDM=0.
 GePol: Maximum number of non-zero 1st derivatives   =     197
 Leave Link  701 at Thu Oct 13 22:58:16 2016, MaxMem= 1342177280 cpu:     204.6
 (Enter /opt/software/g09/l702.exe)
 L702 exits ... SP integral derivatives will be done elsewhere.
 Leave Link  702 at Thu Oct 13 22:58:16 2016, MaxMem= 1342177280 cpu:       0.3
 (Enter /opt/software/g09/linda-exe/l703.exel)
 Compute integral first derivatives, UseDBF=F ICtDFT=           0.
 Integral derivatives from FoFDir, PRISM(SPDF).
 Calling FoFJK, ICntrl=      2127 FMM=T ISym2X=0 I1Cent= 0 IOpClX= 1 NMat=1 NMatS=1 NMatT=0.
 FoFCou: FMM=T IPFlag=           0 FMFlag=      100000 FMFlg1=        2001
         NFxFlg=           0 DoJE=F BraDBF=F KetDBF=F FulRan=T
         Omega=  0.000000  0.000000  1.000000  0.000000  0.000000 ICntrl=    2127 IOpCl=  1
         NMat0=    1 NMatS0=    1 NMatT0=    0 NMatD0=    1 NMtDS0=    0 NMtDT0=    0
         I1Cent=           0 NGrid=           0.
 Symmetry not used in FoFCou.
 FMM levels:  10  Number of levels for PrismC:   9
 Leave Link  703 at Thu Oct 13 22:58:40 2016, MaxMem= 1342177280 cpu:     441.1
 (Enter /opt/software/g09/l716.exe)
 Dipole        =-2.10015168D-01 2.77023842D+00 1.32735082D+00
 ***** Axes restored to original set *****
 -------------------------------------------------------------------
 Center     Atomic                   Forces (Hartrees/Bohr)
 Number     Number              X              Y              Z
 -------------------------------------------------------------------
      1        8           0.000398032   -0.002377811   -0.000966656
      2        6          -0.007362727   -0.000042230   -0.000469422
      3        6          -0.008518818   -0.000827099   -0.000000121
      4        6          -0.000412215   -0.001593041    0.000517694
      5        6          -0.004711844    0.000299137   -0.004968927
      6        8           0.000843029   -0.000517718    0.002941717
      7        6           0.001136399   -0.001409718   -0.002241901
      8        6          -0.013682021   -0.006804384    0.056820531
      9        8           0.020830809   -0.006144257   -0.015525048
     10        8          -0.003243824   -0.000014411    0.002255171
     11        7          -0.000432607   -0.001841258   -0.003528422
     12        7          -0.020533555   -0.001515174    0.006473691
     13        7          -0.000394751    0.001391615   -0.004378274
     14        6           0.025736526    0.001120184   -0.008041522
     15        6          -0.001032774    0.002108825   -0.009726486
     16        6          -0.001153121    0.000760974   -0.003649967
     17        6          -0.000538525    0.000181818   -0.000750600
     18        6          -0.000441647   -0.000129691    0.000562995
     19        6           0.004639221    0.001257079   -0.007261464
     20        6          -0.002507034    0.001266633   -0.005702490
     21        7          -0.000443155    0.000088215    0.002803067
     22        6           0.000768298    0.000155785    0.000877565
     23        6           0.001583795   -0.000500971    0.000013417
     24        6          -0.000817868    0.000434863   -0.000513403
     25        6          -0.001125724    0.000303166   -0.000093440
     26        6          -0.000139160   -0.000000493   -0.000387072
     27        6           0.000384810   -0.000157530    0.000118026
     28        6           0.000033340   -0.000120454    0.000562816
     29        8          -0.000273585   -0.000376256   -0.000929749
     30        7           0.014592529    0.038442227    0.014108838
     31        7          -0.013057219   -0.000038757   -0.010527637
     32        6           0.019213576   -0.000176966    0.008226688
     33        6           0.003003184    0.000862415    0.003144896
     34        6          -0.000868802    0.000553248    0.001110935
     35        6           0.000446890   -0.000294488   -0.000826066
     36        6           0.000312113    0.000428747    0.000990101
     37        6           0.000968572    0.000435976    0.001131708
     38        6          -0.000403753    0.000547344    0.000867489
     39        8           0.002804749    0.001183109    0.001603279
     40        1           0.001348877   -0.002288479    0.003673638
     41        1          -0.000225552    0.000683120    0.000263925
     42        1           0.001052667   -0.000741483    0.000121365
     43        1          -0.001430314   -0.002717865    0.000191941
     44        1           0.002488687    0.000374186   -0.001055597
     45        1           0.000717763    0.001200212    0.000426793
     46        1           0.001966612   -0.000730660    0.003839562
     47        1           0.002920069   -0.000444268    0.002573722
     48        1           0.000251926   -0.000001413   -0.000078222
     49        1           0.000147014    0.000072717   -0.000395634
     50        1           0.000507179   -0.000184040    0.000727746
     51        1          -0.000163181    0.000194708    0.000021223
     52        1           0.000103539   -0.000015233    0.000101744
     53        1          -0.000087012    0.000037443    0.000069755
     54        1           0.000053675    0.000008619    0.000100420
     55        1           0.000094615    0.000038763    0.000060327
     56        1          -0.000478989    0.000451001   -0.000744233
     57        1           0.000654569   -0.015646393   -0.049465681
     58        1          -0.027585054   -0.001255097   -0.004681715
     59        1          -0.000160837   -0.000055500   -0.000080076
     60        1          -0.000006719   -0.000037623   -0.000048680
     61        1          -0.000045094    0.000048390    0.000117459
     62        1           0.000249864    0.000185796    0.000550152
     63        1           0.004454298   -0.001675006   -0.002764055
     64        8           0.001321068   -0.003472759    0.013804124
     65        1          -0.006823961   -0.000276094    0.004576295
     66        1           0.003073150   -0.000691696    0.003451742
 -------------------------------------------------------------------
 Cartesian Forces:  Max     0.056820531 RMS     0.007913937
 Leave Link  716 at Thu Oct 13 22:58:40 2016, MaxMem= 1342177280 cpu:       0.4
 (Enter /opt/software/g09/l103.exe)

 GradGradGradGradGradGradGradGradGradGradGradGradGradGradGradGradGradGrad
 Berny optimization.
 Using GEDIIS/GDIIS optimizer.
 Internal  Forces:  Max     0.041183076 RMS     0.005723567
 Search for a local minimum.
 Step number   3 out of a maximum of  343
 All quantities printed in internal units (Hartrees-Bohrs-Radians)
 RMS Force = .57236D-02 SwitMx=.10000D-02 MixMth= 1
 Mixed Optimization -- RFO/linear search
 Update second derivatives using D2CorX and points    2    3
 ITU=  0  1  0
 Use linear search instead of GDIIS.
     Eigenvalues ---    0.00230   0.00230   0.00457   0.00496   0.00601
     Eigenvalues ---    0.01065   0.01217   0.01236   0.01295   0.01309
     Eigenvalues ---    0.01358   0.01395   0.01618   0.01705   0.01735
     Eigenvalues ---    0.01739   0.01802   0.01862   0.01868   0.01887
     Eigenvalues ---    0.01915   0.01935   0.01937   0.01940   0.01975
     Eigenvalues ---    0.01985   0.01989   0.02013   0.02032   0.02089
     Eigenvalues ---    0.02093   0.02098   0.02099   0.02104   0.02108
     Eigenvalues ---    0.02116   0.02129   0.02130   0.02134   0.02146
     Eigenvalues ---    0.02159   0.02160   0.02163   0.02166   0.02166
     Eigenvalues ---    0.02184   0.02186   0.02188   0.02189   0.02213
     Eigenvalues ---    0.02262   0.02437   0.02945   0.03137   0.03178
     Eigenvalues ---    0.03217   0.03599   0.04040   0.04742   0.05075
     Eigenvalues ---    0.05805   0.06144   0.06782   0.07242   0.07334
     Eigenvalues ---    0.08674   0.09387   0.09492   0.10318   0.12895
     Eigenvalues ---    0.13024   0.13710   0.15958   0.16000   0.16000
     Eigenvalues ---    0.16000   0.16000   0.16000   0.16000   0.16000
     Eigenvalues ---    0.16000   0.16000   0.16000   0.16000   0.16000
     Eigenvalues ---    0.16000   0.16000   0.16000   0.16015   0.16044
     Eigenvalues ---    0.16165   0.16334   0.16490   0.17428   0.17743
     Eigenvalues ---    0.21858   0.22000   0.22000   0.22000   0.22000
     Eigenvalues ---    0.22004   0.22020   0.22271   0.22481   0.22484
     Eigenvalues ---    0.22520   0.22713   0.23016   0.23762   0.24151
     Eigenvalues ---    0.24468   0.24474   0.24489   0.24606   0.24983
     Eigenvalues ---    0.24998   0.24999   0.24999   0.25000   0.25000
     Eigenvalues ---    0.25000   0.25000   0.25000   0.27111   0.27231
     Eigenvalues ---    0.27424   0.29111   0.30477   0.31099   0.33792
     Eigenvalues ---    0.33833   0.33940   0.34130   0.34815   0.34970
     Eigenvalues ---    0.34974   0.35021   0.35077   0.35100   0.35153
     Eigenvalues ---    0.35221   0.35267   0.35288   0.35377   0.35379
     Eigenvalues ---    0.35392   0.35408   0.36412   0.37099   0.37171
     Eigenvalues ---    0.37291   0.38075   0.38981   0.40645   0.40649
     Eigenvalues ---    0.41105   0.41478   0.41564   0.41589   0.42775
     Eigenvalues ---    0.43725   0.44073   0.44194   0.44347   0.44526
     Eigenvalues ---    0.44953   0.45507   0.45548   0.45790   0.46278
     Eigenvalues ---    0.46300   0.46485   0.46882   0.46952   0.47243
     Eigenvalues ---    0.48985   0.49012   0.51261   0.51696   0.52605
     Eigenvalues ---    0.52819   0.53037   0.53586   0.54031   0.55487
     Eigenvalues ---    0.56448   0.70007   0.71044   0.71627   0.86809
     Eigenvalues ---    0.91564   0.96501
 RFO step:  Lambda=-3.98401335D-02 EMin= 2.29999736D-03
 Quartic linear search produced a step of  0.01628.
 Iteration  1 RMS(Cart)=  0.13460427 RMS(Int)=  0.00717161
 Iteration  2 RMS(Cart)=  0.01714598 RMS(Int)=  0.00076132
 Iteration  3 RMS(Cart)=  0.00036120 RMS(Int)=  0.00073863
 Iteration  4 RMS(Cart)=  0.00000123 RMS(Int)=  0.00073863
 Iteration  5 RMS(Cart)=  0.00000001 RMS(Int)=  0.00073863
 Variable       Old X    -DE/DX   Delta X   Delta X   Delta X     New X
                                 (Linear)    (Quad)   (Total)
    R1        2.69078  -0.00341  -0.00009  -0.00875  -0.00887   2.68191
    R2        1.86663  -0.00269   0.00001  -0.00469  -0.00461   1.86202
    R3        2.93291  -0.00079  -0.00001  -0.00262  -0.00263   2.93028
    R4        2.94367  -0.00250   0.00008  -0.00577  -0.00576   2.93790
    R5        2.96994  -0.01110   0.00037  -0.02641  -0.02604   2.94390
    R6        2.31714   0.00309  -0.00006   0.00190   0.00185   2.31898
    R7        2.55392   0.00783  -0.00023   0.00827   0.00805   2.56197
    R8        2.86027   0.00152  -0.00005   0.00326   0.00314   2.86341
    R9        2.07251   0.00033  -0.00002   0.00045   0.00043   2.07294
   R10        2.05521   0.00016  -0.00002  -0.00001  -0.00004   2.05517
   R11        2.93288  -0.01396   0.00058  -0.02761  -0.02703   2.90586
   R12        2.05903   0.00020  -0.00001   0.00032   0.00032   2.05934
   R13        2.06327   0.00142  -0.00009   0.00177   0.00169   2.06496
   R14        2.35917  -0.00152   0.00017   0.00181   0.00199   2.36116
   R15        2.55960  -0.00052  -0.00013  -0.00340  -0.00352   2.55607
   R16        2.35499  -0.02510   0.00055  -0.01257  -0.01195   2.34304
   R17        2.66980  -0.01462   0.00055  -0.02417  -0.02103   2.64878
   R18        3.03788   0.03953   0.00642   0.32723   0.32834   3.36623
   R19        3.41330   0.00895   0.00437   0.13628   0.14102   3.55433
   R20        3.29698   0.00076   0.00015   0.00789   0.00812   3.30510
   R21        2.58388   0.00196   0.00012   0.00554   0.00565   2.58953
   R22        1.93116  -0.00055   0.00002  -0.00066  -0.00064   1.93052
   R23        2.56306   0.02167  -0.00040   0.02923   0.02883   2.59190
   R24        1.93672  -0.00434   0.00027  -0.00279  -0.00252   1.93420
   R25        2.41508   0.02277  -0.00026   0.02333   0.02306   2.43815
   R26        2.76484  -0.00241  -0.00003  -0.00617  -0.00619   2.75864
   R27        2.08239  -0.00363   0.00029  -0.00306  -0.00277   2.07962
   R28        2.66528   0.00090   0.00005   0.00271   0.00276   2.66804
   R29        2.66893   0.00333  -0.00011   0.00480   0.00470   2.67364
   R30        2.62916  -0.00109   0.00001  -0.00214  -0.00213   2.62703
   R31        2.06696  -0.00466   0.00049  -0.00107  -0.00058   2.06638
   R32        2.64209  -0.00020   0.00005   0.00028   0.00032   2.64241
   R33        2.04987   0.00016  -0.00001   0.00022   0.00021   2.05009
   R34        2.63351   0.00044   0.00001   0.00104   0.00105   2.63456
   R35        2.05126   0.00019  -0.00001   0.00021   0.00019   2.05146
   R36        2.63507   0.00658  -0.00012   0.01036   0.01024   2.64531
   R37        2.05248   0.00091  -0.00005   0.00115   0.00110   2.05358
   R38        2.53766   0.01944  -0.00179   0.00417   0.00239   2.54004
   R39        2.43425  -0.00021   0.00007   0.00116   0.00123   2.43548
   R40        2.75917  -0.00163   0.00002  -0.00325  -0.00323   2.75594
   R41        2.07219   0.00018  -0.00005  -0.00055  -0.00060   2.07159
   R42        2.68596  -0.00326   0.00008  -0.00515  -0.00507   2.68088
   R43        2.66443   0.00007   0.00005   0.00111   0.00116   2.66559
   R44        2.64627   0.00018   0.00001   0.00057   0.00058   2.64685
   R45        2.56490  -0.00007   0.00001   0.00007   0.00008   2.56498
   R46        2.63299  -0.00022   0.00001  -0.00016  -0.00015   2.63284
   R47        2.05417   0.00014  -0.00002  -0.00013  -0.00016   2.05401
   R48        2.64296  -0.00061   0.00005  -0.00009  -0.00004   2.64292
   R49        2.05160   0.00008  -0.00001   0.00008   0.00008   2.05167
   R50        2.62654  -0.00015   0.00000  -0.00030  -0.00030   2.62625
   R51        2.05001  -0.00001   0.00000  -0.00005  -0.00005   2.04995
   R52        2.05368  -0.00010  -0.00001  -0.00036  -0.00036   2.05331
   R53        1.83163  -0.00096   0.00005  -0.00056  -0.00051   1.83113
   R54        2.68296   0.00143   0.00124   0.02640   0.02727   2.71023
   R55        2.00585  -0.02015   0.00091  -0.04592  -0.03974   1.96611
   R56        2.46250   0.00011   0.00028   0.00570   0.00590   2.46840
   R57        3.32141  -0.00381  -0.00013  -0.03297  -0.03281   3.28860
   R58        2.75592  -0.00936   0.00012  -0.01914  -0.01923   2.73668
   R59        2.08654  -0.00517   0.00014  -0.00946  -0.00908   2.07746
   R60        2.66256   0.00082   0.00002   0.00205   0.00203   2.66458
   R61        2.68936   0.00112  -0.00001   0.00152   0.00116   2.69052
   R62        2.62448  -0.00163   0.00002  -0.00241  -0.00236   2.62212
   R63        2.05370  -0.00013  -0.00002  -0.00069  -0.00070   2.05299
   R64        2.65486  -0.00179   0.00006  -0.00215  -0.00200   2.65286
   R65        2.05004  -0.00003  -0.00001  -0.00021  -0.00021   2.04983
   R66        2.62838   0.00030   0.00002   0.00096   0.00103   2.62941
   R67        2.05264   0.00000  -0.00001  -0.00011  -0.00012   2.05252
   R68        2.65291  -0.00086   0.00001  -0.00149  -0.00151   2.65140
   R69        2.05213  -0.00061   0.00002  -0.00110  -0.00108   2.05105
   R70        2.54123   0.00712   0.00002   0.01131   0.01124   2.55247
   R71        1.87735  -0.00115   0.00009   0.00028   0.00060   1.87796
   R72        1.83636  -0.00261   0.00024   0.00068   0.00092   1.83728
    A1        1.87897  -0.00644   0.00034  -0.02334  -0.02309   1.85588
    A2        1.91997  -0.00127   0.00006  -0.00199  -0.00189   1.91808
    A3        1.93252   0.00226  -0.00013   0.00494   0.00457   1.93709
    A4        1.94478  -0.00196   0.00027  -0.01313  -0.01288   1.93190
    A5        1.84452   0.00101  -0.00009   0.01162   0.01159   1.85611
    A6        1.83512   0.00304  -0.00025   0.01355   0.01335   1.84846
    A7        1.98116  -0.00291   0.00012  -0.01299  -0.01295   1.96821
    A8        2.10887   0.00140   0.00008   0.00603   0.00611   2.11498
    A9        1.98315  -0.00222   0.00007  -0.00572  -0.00565   1.97750
   A10        2.19109   0.00081  -0.00015  -0.00034  -0.00049   2.19061
   A11        1.96954  -0.00208   0.00003  -0.00639  -0.00657   1.96297
   A12        1.87301   0.00064  -0.00013   0.00120   0.00113   1.87414
   A13        1.94133   0.00012   0.00015   0.00002   0.00023   1.94156
   A14        1.85559   0.00095   0.00005   0.00703   0.00712   1.86271
   A15        1.93994   0.00084  -0.00013  -0.00078  -0.00083   1.93911
   A16        1.87876  -0.00037   0.00001  -0.00039  -0.00040   1.87836
   A17        2.10071  -0.01955   0.00112  -0.05242  -0.05128   2.04943
   A18        1.84959   0.00773  -0.00063   0.02199   0.02122   1.87081
   A19        1.88479   0.00396   0.00016   0.00926   0.00935   1.89414
   A20        1.85440   0.00372  -0.00030   0.00505   0.00489   1.85929
   A21        1.86774   0.00758  -0.00050   0.01674   0.01613   1.88387
   A22        1.90005  -0.00283   0.00009   0.00261   0.00244   1.90249
   A23        2.10886   0.00298  -0.00016   0.00703   0.00673   2.11560
   A24        2.07746   0.00020   0.00007   0.00170   0.00184   2.07930
   A25        2.09671  -0.00318   0.00010  -0.00873  -0.00857   2.08814
   A26        2.07519   0.00900  -0.00091   0.01410   0.01367   2.08886
   A27        1.98716  -0.00386   0.00018  -0.00087  -0.00283   1.98432
   A28        1.65213  -0.00208   0.00088  -0.01229  -0.00802   1.64412
   A29        2.22078  -0.00510   0.00073  -0.01292  -0.01094   2.20983
   A30        2.29546   0.00451   0.00023   0.04991   0.04773   2.34319
   A31        2.13792   0.00096   0.00003   0.00421   0.00416   2.14208
   A32        2.02682  -0.00001   0.00007   0.00216   0.00215   2.02898
   A33        2.11223  -0.00081  -0.00007  -0.00403  -0.00418   2.10805
   A34        2.09679   0.00651  -0.00214  -0.01761  -0.01975   2.07704
   A35        2.04454  -0.00272   0.00037  -0.00119  -0.00082   2.04372
   A36        2.14170  -0.00379   0.00177   0.01885   0.02062   2.16231
   A37        1.92465   0.04118  -0.00173   0.09843   0.09670   2.02136
   A38        2.18765  -0.00032   0.00049   0.00798   0.00847   2.19612
   A39        2.09835   0.00168  -0.00027   0.00237   0.00210   2.10044
   A40        1.99719  -0.00137  -0.00021  -0.01036  -0.01057   1.98662
   A41        2.02683   0.00422  -0.00007   0.01212   0.01205   2.03888
   A42        2.21222  -0.00742   0.00014  -0.02155  -0.02141   2.19081
   A43        2.04413   0.00319  -0.00007   0.00943   0.00937   2.05350
   A44        2.13380   0.00028  -0.00006  -0.00100  -0.00106   2.13275
   A45        2.06265   0.00017  -0.00010  -0.00045  -0.00055   2.06210
   A46        2.08673  -0.00045   0.00016   0.00145   0.00161   2.08834
   A47        2.08161  -0.00042   0.00004  -0.00225  -0.00222   2.07939
   A48        2.09601   0.00042  -0.00004   0.00170   0.00166   2.09768
   A49        2.10557   0.00000   0.00000   0.00055   0.00056   2.10612
   A50        2.09304   0.00113   0.00000   0.00315   0.00313   2.09617
   A51        2.10536  -0.00095   0.00002  -0.00308  -0.00305   2.10231
   A52        2.08478  -0.00017  -0.00002  -0.00007  -0.00008   2.08470
   A53        2.10246   0.00168  -0.00011   0.00445   0.00434   2.10680
   A54        2.09916  -0.00079   0.00005  -0.00218  -0.00213   2.09703
   A55        2.08156  -0.00088   0.00006  -0.00227  -0.00221   2.07935
   A56        2.11133  -0.00586   0.00020  -0.01378  -0.01356   2.09776
   A57        2.07833  -0.00160  -0.00018  -0.00938  -0.00957   2.06876
   A58        2.09353   0.00746  -0.00002   0.02316   0.02313   2.11666
   A59        2.01672   0.00066  -0.00021  -0.00163  -0.00183   2.01488
   A60        2.18610  -0.00158   0.00014  -0.00323  -0.00309   2.18301
   A61        2.09730   0.00092  -0.00007   0.00222   0.00215   2.09945
   A62        1.99978   0.00066  -0.00007   0.00102   0.00095   2.00073
   A63        2.19293  -0.00244   0.00017  -0.00460  -0.00443   2.18850
   A64        2.03306   0.00198  -0.00017   0.00334   0.00317   2.03623
   A65        2.05717   0.00046   0.00000   0.00127   0.00127   2.05844
   A66        2.09096   0.00015   0.00001   0.00031   0.00032   2.09127
   A67        2.08214  -0.00246   0.00009  -0.00609  -0.00600   2.07614
   A68        2.11009   0.00231  -0.00009   0.00578   0.00569   2.11577
   A69        2.10848  -0.00003  -0.00002  -0.00051  -0.00053   2.10796
   A70        2.07689   0.00003   0.00000   0.00019   0.00019   2.07708
   A71        2.09781  -0.00001   0.00002   0.00032   0.00034   2.09815
   A72        2.09908  -0.00020   0.00003   0.00016   0.00019   2.09927
   A73        2.08286   0.00019  -0.00003   0.00014   0.00011   2.08297
   A74        2.10124   0.00001   0.00000  -0.00030  -0.00030   2.10094
   A75        2.07842  -0.00020   0.00000  -0.00031  -0.00031   2.07812
   A76        2.10612  -0.00001   0.00001  -0.00018  -0.00017   2.10595
   A77        2.09864   0.00021  -0.00001   0.00049   0.00048   2.09912
   A78        2.13226  -0.00018  -0.00002  -0.00092  -0.00094   2.13132
   A79        2.06316   0.00009   0.00001   0.00049   0.00050   2.06366
   A80        2.08776   0.00009   0.00001   0.00044   0.00044   2.08821
   A81        1.90337   0.00006   0.00000   0.00030   0.00031   1.90367
   A82        2.16200  -0.01324   0.00085  -0.01851  -0.02143   2.14057
   A83        1.94903  -0.00892  -0.00157  -0.02627  -0.03073   1.91830
   A84        2.08688   0.00997   0.00005   0.02966   0.02831   2.11519
   A85        2.13220  -0.01467   0.00024  -0.04988  -0.04994   2.08227
   A86        1.93845   0.02786  -0.00197   0.08715   0.08501   2.02346
   A87        2.21175  -0.01321   0.00172  -0.03757  -0.03543   2.17632
   A88        2.07692  -0.00128  -0.00012  -0.00463  -0.00421   2.07271
   A89        2.13709  -0.00111   0.00018  -0.00288  -0.00339   2.13370
   A90        2.06917   0.00240  -0.00006   0.00752   0.00761   2.07678
   A91        2.11849  -0.00047  -0.00002  -0.00235  -0.00251   2.11598
   A92        2.06577   0.00038  -0.00002   0.00131   0.00136   2.06713
   A93        2.09893   0.00009   0.00004   0.00104   0.00115   2.10008
   A94        2.08132  -0.00063   0.00003  -0.00199  -0.00197   2.07935
   A95        2.10043   0.00037  -0.00001   0.00137   0.00136   2.10179
   A96        2.10144   0.00027  -0.00002   0.00062   0.00060   2.10204
   A97        2.11021   0.00061   0.00002   0.00202   0.00204   2.11226
   A98        2.09194  -0.00044   0.00000  -0.00150  -0.00151   2.09044
   A99        2.08103  -0.00017  -0.00002  -0.00052  -0.00054   2.08049
   A100       2.09333   0.00207  -0.00012   0.00440   0.00417   2.09750
   A101       2.12001  -0.00088  -0.00001  -0.00274  -0.00269   2.11732
   A102       2.06984  -0.00119   0.00013  -0.00166  -0.00148   2.06836
   A103       2.09385  -0.00398   0.00015  -0.00959  -0.00935   2.08450
   A104       2.11817   0.00815  -0.00027   0.01906   0.01823   2.13640
   A105       2.07116  -0.00417   0.00013  -0.00947  -0.00888   2.06228
   A106       1.85417   0.01304  -0.00049   0.05054   0.04973   1.90390
   A107       1.84208   0.01430  -0.00075   0.05286   0.05211   1.89419
    D1       -2.43927  -0.00039   0.00046  -0.00444  -0.00398  -2.44325
    D2       -0.40693   0.00143   0.00030   0.01151   0.01183  -0.39509
    D3        1.81578  -0.00217   0.00057  -0.01201  -0.01151   1.80427
    D4       -3.05959   0.00121  -0.00012   0.00568   0.00551  -3.05408
    D5        0.09381   0.00133  -0.00011   0.00790   0.00774   0.10155
    D6        1.13680  -0.00139   0.00007  -0.00585  -0.00568   1.13112
    D7       -1.99298  -0.00127   0.00007  -0.00363  -0.00345  -1.99643
    D8       -0.96368  -0.00002   0.00009  -0.00311  -0.00307  -0.96675
    D9        2.18973   0.00010   0.00010  -0.00088  -0.00084   2.18888
   D10        0.88940  -0.00013   0.00033   0.01186   0.01209   0.90149
   D11       -1.14895  -0.00052   0.00033   0.00610   0.00639  -1.14256
   D12        3.08349  -0.00053   0.00030   0.00584   0.00607   3.08956
   D13        2.96789   0.00016   0.00027   0.01896   0.01923   2.98712
   D14        0.92954  -0.00024   0.00027   0.01320   0.01353   0.94307
   D15       -1.12120  -0.00024   0.00024   0.01294   0.01321  -1.10799
   D16       -1.31317   0.00295  -0.00003   0.03571   0.03564  -1.27753
   D17        2.93166   0.00256  -0.00002   0.02996   0.02994   2.96160
   D18        0.88092   0.00255  -0.00005   0.02969   0.02962   0.91054
   D19       -1.08612   0.00003   0.00001   0.01076   0.01062  -1.07550
   D20        3.09688   0.00168   0.00016   0.02073   0.02098   3.11786
   D21        1.06317  -0.00087   0.00029   0.00212   0.00234   1.06551
   D22        3.11766   0.00076  -0.00005   0.01196   0.01179   3.12945
   D23        1.01748   0.00241   0.00010   0.02192   0.02215   1.03963
   D24       -1.01623  -0.00014   0.00023   0.00331   0.00351  -1.01272
   D25        1.10995  -0.00084   0.00015  -0.00369  -0.00361   1.10634
   D26       -0.99023   0.00081   0.00030   0.00627   0.00675  -0.98348
   D27       -3.02394  -0.00175   0.00043  -0.01234  -0.01189  -3.03583
   D28       -3.13958  -0.00025  -0.00004  -0.00430  -0.00432   3.13929
   D29       -0.01647  -0.00008   0.00001  -0.00121  -0.00120  -0.01767
   D30        0.01448  -0.00012  -0.00003  -0.00200  -0.00203   0.01245
   D31        3.13759   0.00004   0.00001   0.00109   0.00109   3.13868
   D32       -0.70828   0.00033   0.00048   0.01510   0.01561  -0.69267
   D33        2.45258   0.00043   0.00035   0.01509   0.01546   2.46804
   D34        1.34036   0.00056   0.00037   0.01746   0.01781   1.35817
   D35       -1.78196   0.00066   0.00024   0.01745   0.01765  -1.76431
   D36       -2.90312   0.00111   0.00036   0.02068   0.02105  -2.88207
   D37        0.25774   0.00122   0.00022   0.02066   0.02089   0.27864
   D38       -1.77542  -0.00316   0.00070  -0.00271  -0.00275  -1.77817
   D39        1.37727  -0.00723   0.00069  -0.03093  -0.03242   1.34484
   D40        0.73052   0.00917   0.00117   0.06913   0.07296   0.80348
   D41        0.32238  -0.00288   0.00038  -0.00444  -0.00466   0.31772
   D42       -2.80812  -0.00694   0.00038  -0.03266  -0.03434  -2.84246
   D43        2.82832   0.00945   0.00086   0.06740   0.07104   2.89936
   D44        2.35032  -0.00072   0.00009   0.00896   0.00845   2.35876
   D45       -0.78018  -0.00478   0.00008  -0.01926  -0.02123  -0.80141
   D46       -1.42693   0.01161   0.00056   0.08080   0.08415  -1.34278
   D47       -0.06760   0.00018   0.00003   0.00286   0.00290  -0.06470
   D48       -3.09064  -0.00108  -0.00019  -0.01910  -0.01930  -3.10994
   D49        3.09312   0.00021  -0.00010   0.00266   0.00258   3.09570
   D50        0.07009  -0.00104  -0.00032  -0.01929  -0.01963   0.05046
   D51       -3.08677   0.00047  -0.00043  -0.00883  -0.00869  -3.09547
   D52        0.06702  -0.00411  -0.00042  -0.04008  -0.04101   0.02601
   D53       -3.05395  -0.00120  -0.00023  -0.02107  -0.02128  -3.07523
   D54       -0.03660   0.00018   0.00001   0.00238   0.00236  -0.03424
   D55        3.13670   0.00012  -0.00005   0.00126   0.00122   3.13792
   D56        0.01466  -0.00008  -0.00008  -0.00176  -0.00185   0.01281
   D57        3.14090   0.00024   0.00003   0.00366   0.00369  -3.13860
   D58       -0.00218   0.00025  -0.00001   0.00337   0.00336   0.00119
   D59        3.14029   0.00004  -0.00003   0.00052   0.00049   3.14078
   D60       -0.00232   0.00007  -0.00003   0.00112   0.00109  -0.00123
   D61        0.00010   0.00003   0.00000   0.00079   0.00079   0.00089
   D62        3.14068   0.00007   0.00001   0.00139   0.00139  -3.14111
   D63        3.14105   0.00004   0.00001   0.00068   0.00070  -3.14143
   D64       -0.00121   0.00003   0.00000   0.00051   0.00052  -0.00069
   D65        0.00037   0.00001   0.00001   0.00016   0.00017   0.00054
   D66        3.14130   0.00000   0.00000  -0.00002  -0.00002   3.14128
   D67       -3.14049  -0.00005  -0.00001  -0.00079  -0.00079  -3.14127
   D68       -0.00029  -0.00005  -0.00002  -0.00106  -0.00108  -0.00136
   D69        0.00008  -0.00001   0.00000  -0.00018  -0.00018  -0.00010
   D70        3.14028  -0.00002  -0.00002  -0.00046  -0.00047   3.13981
   D71       -0.00039   0.00000   0.00000   0.00005   0.00004  -0.00035
   D72        3.14148  -0.00001  -0.00001  -0.00025  -0.00025   3.14123
   D73       -3.14131   0.00001   0.00000   0.00023   0.00023  -3.14107
   D74        0.00056   0.00000   0.00000  -0.00007  -0.00006   0.00050
   D75       -0.00006  -0.00001   0.00000  -0.00024  -0.00024  -0.00030
   D76       -3.14119  -0.00001   0.00000  -0.00017  -0.00017  -3.14136
   D77        3.14126   0.00000   0.00000   0.00006   0.00006   3.14131
   D78        0.00012   0.00001   0.00000   0.00013   0.00013   0.00025
   D79        0.00050   0.00001   0.00001   0.00023   0.00023   0.00074
   D80       -3.14098   0.00000   0.00001  -0.00003  -0.00002  -3.14100
   D81       -3.14154   0.00001   0.00000   0.00015   0.00016  -3.14138
   D82        0.00017  -0.00001   0.00000  -0.00010  -0.00010   0.00007
   D83       -0.00052   0.00000   0.00000  -0.00001  -0.00001  -0.00053
   D84       -3.14071   0.00002   0.00001   0.00030   0.00031  -3.14040
   D85        3.14096   0.00002   0.00000   0.00024   0.00024   3.14120
   D86        0.00078   0.00003   0.00001   0.00055   0.00056   0.00134
   D87        3.10954   0.00035   0.00007   0.00693   0.00700   3.11653
   D88       -0.03343   0.00034   0.00005   0.00662   0.00667  -0.02676
   D89        3.13511   0.00009  -0.00003   0.00070   0.00066   3.13578
   D90       -0.00397  -0.00001  -0.00008  -0.00133  -0.00141  -0.00538
   D91       -0.02153   0.00005  -0.00002   0.00091   0.00090  -0.02064
   D92        3.12801   0.00000  -0.00003  -0.00001  -0.00004   3.12797
   D93        3.11767   0.00015   0.00003   0.00284   0.00287   3.12054
   D94       -0.01597   0.00010   0.00002   0.00191   0.00193  -0.01404
   D95       -3.13279  -0.00007  -0.00001  -0.00104  -0.00105  -3.13385
   D96        0.00983  -0.00006  -0.00001  -0.00084  -0.00085   0.00899
   D97        0.00075  -0.00001   0.00000  -0.00010  -0.00010   0.00065
   D98       -3.13981   0.00000   0.00001   0.00010   0.00011  -3.13970
   D99        3.13455   0.00003   0.00001   0.00071   0.00072   3.13527
   D100      -0.00452  -0.00001   0.00000  -0.00004  -0.00004  -0.00456
   D101       0.00026   0.00000   0.00000  -0.00011  -0.00011   0.00015
   D102      -3.13880  -0.00004  -0.00001  -0.00086  -0.00088  -3.13968
   D103      -0.00087   0.00002   0.00000   0.00028   0.00029  -0.00058
   D104       3.14027   0.00002   0.00000   0.00025   0.00026   3.14053
   D105       3.13967   0.00001  -0.00001   0.00008   0.00007   3.13975
   D106      -0.00237   0.00001  -0.00001   0.00005   0.00004  -0.00233
   D107      -3.11124  -0.00025  -0.00008  -0.00464  -0.00472  -3.11595
   D108       0.03141  -0.00024  -0.00007  -0.00444  -0.00451   0.02690
   D109      -0.00004  -0.00001   0.00000  -0.00026  -0.00027  -0.00030
   D110       3.14125   0.00001   0.00000   0.00011   0.00011   3.14136
   D111      -3.14117  -0.00001   0.00000  -0.00023  -0.00024  -3.14141
   D112       0.00011   0.00001   0.00000   0.00014   0.00014   0.00025
   D113       0.00103   0.00000   0.00000   0.00005   0.00006   0.00109
   D114       3.14087   0.00003   0.00001   0.00059   0.00060   3.14147
   D115      -3.14025  -0.00002   0.00000  -0.00032  -0.00033  -3.14057
   D116      -0.00041   0.00001   0.00000   0.00022   0.00022  -0.00019
   D117      -0.00115   0.00001   0.00000   0.00014   0.00014  -0.00102
   D118       3.13788   0.00005   0.00001   0.00090   0.00091   3.13879
   D119      -3.14100  -0.00002  -0.00001  -0.00040  -0.00041  -3.14141
   D120      -0.00196   0.00002   0.00001   0.00036   0.00036  -0.00160
   D121       0.10593   0.01178   0.00092   0.03551   0.04018   0.14611
   D122      -1.49898  -0.02124  -0.00246  -0.20992  -0.21638  -1.71536
   D123      -3.12123  -0.00059   0.00020  -0.00890  -0.00853  -3.12976
   D124      -0.01936  -0.00130  -0.00016  -0.01727  -0.01769  -0.03705
   D125       3.13177   0.00029  -0.00025   0.00023   0.00004   3.13181
   D126      -0.00550   0.00012  -0.00029  -0.00296  -0.00318  -0.00868
   D127       0.03642   0.00017   0.00020   0.00713   0.00726   0.04368
   D128      -3.10085  -0.00001   0.00017   0.00393   0.00404  -3.09681
   D129      -3.13932  -0.00017  -0.00003  -0.00324  -0.00327   3.14059
   D130       0.00278  -0.00014  -0.00003  -0.00262  -0.00265   0.00013
   D131      -0.00188  -0.00001   0.00000  -0.00020  -0.00019  -0.00207
   D132       3.14022   0.00002   0.00001   0.00042   0.00043   3.14065
   D133       3.13808   0.00020   0.00003   0.00357   0.00360  -3.14151
   D134      -0.00304   0.00030   0.00000   0.00496   0.00497   0.00193
   D135       0.00079   0.00003  -0.00001   0.00042   0.00041   0.00120
   D136      -3.14033   0.00014  -0.00003   0.00180   0.00178  -3.13855
   D137       0.00184  -0.00002   0.00001  -0.00012  -0.00012   0.00172
   D138      -3.14048   0.00000   0.00000   0.00002   0.00002  -3.14046
   D139      -3.14026  -0.00005   0.00000  -0.00075  -0.00075  -3.14102
   D140       0.00060  -0.00004   0.00000  -0.00061  -0.00061  -0.00001
   D141      -0.00070   0.00002  -0.00001   0.00021   0.00020  -0.00050
   D142       3.14135   0.00000  -0.00001  -0.00014  -0.00014   3.14121
   D143      -3.14156   0.00001  -0.00001   0.00007   0.00006  -3.14151
   D144       0.00049  -0.00002   0.00000  -0.00028  -0.00029   0.00020
   D145      -0.00036  -0.00001   0.00001   0.00001   0.00002  -0.00034
   D146      -3.14096  -0.00007   0.00001  -0.00090  -0.00088   3.14134
   D147       3.14078   0.00002   0.00000   0.00036   0.00036   3.14114
   D148       0.00017  -0.00004   0.00000  -0.00055  -0.00054  -0.00037
   D149       0.00030  -0.00002   0.00000  -0.00033  -0.00033  -0.00002
   D150       3.14144  -0.00012   0.00003  -0.00167  -0.00163   3.13980
   D151       3.14094   0.00003   0.00000   0.00055   0.00055   3.14149
   D152      -0.00112  -0.00006   0.00002  -0.00079  -0.00075  -0.00187
   D153      -0.00831   0.00045   0.00000   0.00646   0.00646  -0.00186
   D154       3.13375   0.00055  -0.00003   0.00783   0.00781   3.14156
         Item               Value     Threshold  Converged?
 Maximum Force            0.041183     0.000450     NO 
 RMS     Force            0.005724     0.000300     NO 
 Maximum Displacement     0.507806     0.001800     NO 
 RMS     Displacement     0.136918     0.001200     NO 
 Predicted change in Energy=-2.520279D-02
 GradGradGradGradGradGradGradGradGradGradGradGradGradGradGradGradGradGrad

 Leave Link  103 at Thu Oct 13 22:58:50 2016, MaxMem= 1342177280 cpu:     162.3
 (Enter /opt/software/g09/l202.exe)
 Stoichiometry    C27H26N6O7
 Framework group  C1[X(C27H26N6O7)]
 Deg. of freedom   192
 Full point group                 C1      NOp   1
 Largest Abelian subgroup         C1      NOp   1
 Largest concise Abelian subgroup C1      NOp   1
                         Standard orientation:                         
 ---------------------------------------------------------------------
 Center     Atomic      Atomic             Coordinates (Angstroms)
 Number     Number       Type             X           Y           Z
 ---------------------------------------------------------------------
      1          8           0       -1.154886   -1.616879    0.818560
      2          6           0       -1.056072   -0.444204    0.025326
      3          6           0       -2.470783    0.022718   -0.404851
      4          6           0       -0.436977    0.727439    0.838329
      5          6           0       -0.282949   -0.736475   -1.295179
      6          8           0       -2.621658    0.967445   -1.173377
      7          6           0        0.865192    0.341588    1.510239
      8          6           0        1.175531   -1.207993   -1.172424
      9          8           0        2.099188   -0.406039   -1.374989
     10          8           0        1.014470   -0.782021    2.035976
     11          7           0        1.873562    1.241849    1.558103
     12          7           0       -3.469041   -0.698270    0.162321
     13          7           0       -4.769970   -0.382153   -0.135789
     14          6           0       -5.669848   -1.110041    0.434343
     15          6           0       -7.113490   -0.968336    0.270433
     16          6           0       -7.927698   -1.872204    0.986986
     17          6           0       -9.315462   -1.837843    0.912936
     18          6           0       -9.930578   -0.877760    0.103537
     19          6           0       -9.155455    0.030116   -0.616599
     20          6           0       -7.758080   -0.005703   -0.541709
     21          7           0        1.798142    2.471491    0.958039
     22          6           0        2.867508    3.187573    1.026543
     23          6           0        3.021246    4.520964    0.456182
     24          6           0        2.028898    5.219898   -0.278215
     25          6           0        2.305921    6.496790   -0.782832
     26          6           0        3.547501    7.092746   -0.572041
     27          6           0        4.538783    6.420684    0.150243
     28          6           0        4.267003    5.153209    0.651287
     29          8           0        0.821817    4.631639   -0.476344
     30          7           0        1.303100   -2.554522   -0.804631
     31          7           0        2.575064   -3.178459   -0.581655
     32          6           0        3.676863   -2.477402   -0.553907
     33          6           0        4.940710   -3.151440   -0.340312
     34          6           0        6.124126   -2.384969   -0.324419
     35          6           0        7.362532   -2.977485   -0.122870
     36          6           0        7.432949   -4.366744    0.066188
     37          6           0        6.283808   -5.151215    0.054586
     38          6           0        5.027838   -4.559403   -0.147586
     39          8           0        3.939632   -5.359525   -0.153245
     40          1           0       -0.492637   -1.518994    1.541567
     41          1           0       -1.142898    0.979489    1.639235
     42          1           0       -0.311017    1.613004    0.219719
     43          1           0       -0.261992    0.190359   -1.867986
     44          1           0       -0.834377   -1.491752   -1.860458
     45          1           0        2.740970    0.925928    1.995639
     46          1           0       -3.195868   -1.463854    0.784317
     47          1           0       -5.377439   -1.925334    1.113218
     48          1           0       -9.909635   -2.548600    1.477473
     49          1           0      -11.012692   -0.831580    0.030143
     50          1           0       -9.632680    0.776937   -1.245446
     51          1           0        3.756015    2.806410    1.543270
     52          1           0        1.536335    7.019976   -1.344474
     53          1           0        3.737304    8.083335   -0.973849
     54          1           0        5.507681    6.878802    0.317960
     55          1           0        5.031230    4.621513    1.211541
     56          1           0        0.266763    5.219787   -1.010142
     57          1           0        0.820691   -2.398832    0.103949
     58          1           0        3.566653   -1.400707   -0.746622
     59          1           0        6.047319   -1.311563   -0.473283
     60          1           0        8.264491   -2.375010   -0.112108
     61          1           0        8.397013   -4.841342    0.224468
     62          1           0        6.332811   -6.225679    0.200023
     63          1           0        3.129295   -4.804894   -0.305961
     64          8           0       -6.999826    0.864911   -1.230022
     65          1           0       -7.585447    1.439561   -1.751644
     66          1           0       -7.437893   -2.619808    1.616973
 ---------------------------------------------------------------------
 Rotational constants (GHZ):      0.0853472      0.0391278      0.0280244
 Leave Link  202 at Thu Oct 13 22:58:50 2016, MaxMem= 1342177280 cpu:       1.0
 (Enter /opt/software/g09/l301.exe)
 Basis read from rwf:  (5D, 7F)
 Pseudo-potential data read from rwf file.
 There are   690 symmetry adapted basis functions of A   symmetry.
 Integral buffers will be    131072 words long.
 Raffenetti 2 integral format.
 Two-electron integral symmetry is turned on.
   690 basis functions,  1302 primitive gaussians,   730 cartesian basis functions
   143 alpha electrons      143 beta electrons
       nuclear repulsion energy      4167.7635789268 Hartrees.
 IExCor=  402 DFT=T Ex+Corr=B3LYP ExCW=0 ScaHFX=  0.200000
 ScaDFX=  0.800000  0.720000  1.000000  0.810000 ScalE2=  1.000000  1.000000
 IRadAn=      0 IRanWt=     -1 IRanGd=            0 ICorTp=0
 NAtoms=   66 NActive=   66 NUniq=   66 SFac= 1.00D+00 NAtFMM=   50 NAOKFM=T Big=T
 No density basis found on file   724.
 ------------------------------------------------------------------------------
 Polarizable Continuum Model (PCM)
 =================================
 Model                : PCM.
 Atomic radii         : UFF (Universal Force Field).
 Polarization charges : Total charges.
 Charge compensation  : None.
 Solution method      : Matrix inversion.
 Cavity type          : Scaled VdW (van der Waals Surface) (Alpha=1.100).
 Cavity algorithm     : GePol (No added spheres)
                        Default sphere list used, NSphG=   66.
                        Lebedev-Laikov grids with approx.  5.0 points / Ang**2.
                        Smoothing algorithm: Karplus/York (Gamma=1.0000).
                        Polarization charges: spherical gaussians, with
                                              point-specific exponents (IZeta= 3).
                        Self-potential: point-specific (ISelfS= 7).
                        Self-field    : sphere-specific E.n sum rule (ISelfD= 2).
 1st derivatives      : Analytical E(r).r(x)/FMM algorithm (CHGder, D1EAlg=3).
                        Cavity 1st derivative terms included.
 Solvent              : Water, Eps=  78.355300 Eps(inf)=   1.777849
 ------------------------------------------------------------------------------
 GePol: Number of generator spheres                  =      66
 GePol: Total number of spheres                      =      66
 GePol: Number of exposed spheres                    =      66 (100.00%)
 GePol: Number of points                             =    4954
 GePol: Average weight of points                     =       0.13
 GePol: Minimum weight of points                     =   0.26D-11
 GePol: Maximum weight of points                     =    0.20577
 GePol: Number of points with low weight             =     305
 GePol: Fraction of low-weight points (<1% of avg)   =       6.16%
 GePol: Cavity surface area                          =    637.182 Ang**2
 GePol: Cavity volume                                =    709.083 Ang**3
 Leave Link  301 at Thu Oct 13 22:58:50 2016, MaxMem= 1342177280 cpu:       1.9
 (Enter /opt/software/g09/linda-exe/l302.exel)
 NPDir=0 NMtPBC=     1 NCelOv=     1 NCel=       1 NClECP=     1 NCelD=      1
         NCelK=      1 NCelE2=     1 NClLst=     1 CellRange=     0.0.
 One-electron integrals computed using PRISM.
   1 Symmetry operations used in ECPInt.
 ECPInt:  NShTT=   28441 NPrTT=  163533 LenC2=   15717 LenP2D=   48324.
 LDataN:  DoStor=T MaxTD1= 4 Len=   56
 NBasis=   690 RedAO= T  NBF=   690
 NBsUse=   690 1.00D-06 NBFU=   690
 Precomputing XC quadrature grid using
 IXCGrd= 2 IRadAn=           0 IRanWt=          -1 IRanGd=           0 AccXCQ= 0.00D+00.
 NRdTot=    4292 NPtTot=      549392 NUsed=      580307 NTot=      580339
 NSgBfM=   605   608   611   611   615 NAtAll=    66    66.
 Leave Link  302 at Thu Oct 13 22:58:55 2016, MaxMem= 1342177280 cpu:      78.2
 (Enter /opt/software/g09/l303.exe)
 DipDrv:  MaxL=1.
 Leave Link  303 at Thu Oct 13 22:58:55 2016, MaxMem= 1342177280 cpu:       3.8
 (Enter /opt/software/g09/linda-exe/l401.exel)
 Initial guess read from the read-write file.
 B after Tr=     0.000000    0.000000    0.000000
         Rot=    1.000000    0.000000    0.000000    0.000000 Ang=   0.00 deg.
 Guess basis will be translated and rotated to current coordinates.
 Initial guess orbital symmetries:
 Alpha Orbitals:
       Occupied  (A) (A) (A) (A) (A) (A) (A) (A) (A) (A) (A) (A)
                 (A) (A) (A) (A) (A) (A) (A) (A) (A) (A) (A) (A)
                 (A) (A) (A) (A) (A) (A) (A) (A) (A) (A) (A) (A)
                 (A) (A) (A) (A) (A) (A) (A) (A) (A) (A) (A) (A)
                 (A) (A) (A) (A) (A) (A) (A) (A) (A) (A) (A) (A)
                 (A) (A) (A) (A) (A) (A) (A) (A) (A) (A) (A) (A)
                 (A) (A) (A) (A) (A) (A) (A) (A) (A) (A) (A) (A)
                 (A) (A) (A) (A) (A) (A) (A) (A) (A) (A) (A) (A)
                 (A) (A) (A) (A) (A) (A) (A) (A) (A) (A) (A) (A)
                 (A) (A) (A) (A) (A) (A) (A) (A) (A) (A) (A) (A)
                 (A) (A) (A) (A) (A) (A) (A) (A) (A) (A) (A) (A)
                 (A) (A) (A) (A) (A) (A) (A) (A) (A) (A) (A)
       Virtual   (A) (A) (A) (A) (A) (A) (A) (A) (A) (A) (A) (A)
                 (A) (A) (A) (A) (A) (A) (A) (A) (A) (A) (A) (A)
                 (A) (A) (A) (A) (A) (A) (A) (A) (A) (A) (A) (A)
                 (A) (A) (A) (A) (A) (A) (A) (A) (A) (A) (A) (A)
                 (A) (A) (A) (A) (A) (A) (A) (A) (A) (A) (A) (A)
                 (A) (A) (A) (A) (A) (A) (A) (A) (A) (A) (A) (A)
                 (A) (A) (A) (A) (A) (A) (A) (A) (A) (A) (A) (A)
                 (A) (A) (A) (A) (A) (A) (A) (A) (A) (A) (A) (A)
                 (A) (A) (A) (A) (A) (A) (A) (A) (A) (A) (A) (A)
                 (A) (A) (A) (A) (A) (A) (A) (A) (A) (A) (A) (A)
                 (A) (A) (A) (A) (A) (A) (A) (A) (A) (A) (A) (A)
                 (A) (A) (A) (A) (A) (A) (A) (A) (A) (A) (A) (A)
                 (A) (A) (A) (A) (A) (A) (A) (A) (A) (A) (A) (A)
                 (A) (A) (A) (A) (A) (A) (A) (A) (A) (A) (A) (A)
                 (A) (A) (A) (A) (A) (A) (A) (A) (A) (A) (A) (A)
                 (A) (A) (A) (A) (A) (A) (A) (A) (A) (A) (A) (A)
                 (A) (A) (A) (A) (A) (A) (A) (A) (A) (A) (A) (A)
                 (A) (A) (A) (A) (A) (A) (A) (A) (A) (A) (A) (A)
                 (A) (A) (A) (A) (A) (A) (A) (A) (A) (A) (A) (A)
                 (A) (A) (A) (A) (A) (A) (A) (A) (A) (A) (A) (A)
                 (A) (A) (A) (A) (A) (A) (A) (A) (A) (A) (A) (A)
                 (A) (A) (A) (A) (A) (A) (A) (A) (A) (A) (A) (A)
                 (A) (A) (A) (A) (A) (A) (A) (A) (A) (A) (A) (A)
                 (A) (A) (A) (A) (A) (A) (A) (A) (A) (A) (A) (A)
                 (A) (A) (A) (A) (A) (A) (A) (A) (A) (A) (A) (A)
                 (A) (A) (A) (A) (A) (A) (A) (A) (A) (A) (A) (A)
                 (A) (A) (A) (A) (A) (A) (A) (A) (A) (A) (A) (A)
                 (A) (A) (A) (A) (A) (A) (A) (A) (A) (A) (A) (A)
                 (A) (A) (A) (A) (A) (A) (A) (A) (A) (A) (A) (A)
                 (A) (A) (A) (A) (A) (A) (A) (A) (A) (A) (A) (A)
                 (A) (A) (A) (A) (A) (A) (A) (A) (A) (A) (A) (A)
                 (A) (A) (A) (A) (A) (A) (A) (A) (A) (A) (A) (A)
                 (A) (A) (A) (A) (A) (A) (A) (A) (A) (A) (A) (A)
                 (A) (A) (A) (A) (A) (A) (A) (A) (A) (A) (A) (A)
                 (A) (A) (A) (A) (A) (A) (A) (A) (A) (A) (A) (A)
                 (A) (A) (A) (A) (A) (A) (A) (A) (A) (A) (A) (A)
                 (A) (A) (A) (A) (A) (A) (A) (A) (A) (A) (A) (A)
                 (A) (A) (A) (A) (A) (A) (A) (A) (A) (A) (A) (A)
                 (A) (A) (A) (A) (A) (A) (A) (A) (A) (A) (A) (A)
                 (A) (A) (A) (A) (A) (A) (A) (A) (A) (A) (A) (A)
                 (A) (A) (A) (A) (A) (A) (A) (A) (A) (A) (A) (A)
                 (A) (A) (A) (A) (A) (A) (A) (A) (A) (A) (A) (A)
                 (A) (A) (A) (A) (A) (A) (A) (A) (A) (A) (A) (A)
                 (A) (A) (A) (A) (A) (A) (A) (A) (A) (A) (A) (A)
                 (A) (A) (A) (A) (A) (A) (A) (A) (A) (A) (A) (A)
                 (A) (A) (A) (A) (A) (A) (A)
 Beta  Orbitals:
       Occupied  (A) (A) (A) (A) (A) (A) (A) (A) (A) (A) (A) (A)
                 (A) (A) (A) (A) (A) (A) (A) (A) (A) (A) (A) (A)
                 (A) (A) (A) (A) (A) (A) (A) (A) (A) (A) (A) (A)
                 (A) (A) (A) (A) (A) (A) (A) (A) (A) (A) (A) (A)
                 (A) (A) (A) (A) (A) (A) (A) (A) (A) (A) (A) (A)
                 (A) (A) (A) (A) (A) (A) (A) (A) (A) (A) (A) (A)
                 (A) (A) (A) (A) (A) (A) (A) (A) (A) (A) (A) (A)
                 (A) (A) (A) (A) (A) (A) (A) (A) (A) (A) (A) (A)
                 (A) (A) (A) (A) (A) (A) (A) (A) (A) (A) (A) (A)
                 (A) (A) (A) (A) (A) (A) (A) (A) (A) (A) (A) (A)
                 (A) (A) (A) (A) (A) (A) (A) (A) (A) (A) (A) (A)
                 (A) (A) (A) (A) (A) (A) (A) (A) (A) (A) (A)
       Virtual   (A) (A) (A) (A) (A) (A) (A) (A) (A) (A) (A) (A)
                 (A) (A) (A) (A) (A) (A) (A) (A) (A) (A) (A) (A)
                 (A) (A) (A) (A) (A) (A) (A) (A) (A) (A) (A) (A)
                 (A) (A) (A) (A) (A) (A) (A) (A) (A) (A) (A) (A)
                 (A) (A) (A) (A) (A) (A) (A) (A) (A) (A) (A) (A)
                 (A) (A) (A) (A) (A) (A) (A) (A) (A) (A) (A) (A)
                 (A) (A) (A) (A) (A) (A) (A) (A) (A) (A) (A) (A)
                 (A) (A) (A) (A) (A) (A) (A) (A) (A) (A) (A) (A)
                 (A) (A) (A) (A) (A) (A) (A) (A) (A) (A) (A) (A)
                 (A) (A) (A) (A) (A) (A) (A) (A) (A) (A) (A) (A)
                 (A) (A) (A) (A) (A) (A) (A) (A) (A) (A) (A) (A)
                 (A) (A) (A) (A) (A) (A) (A) (A) (A) (A) (A) (A)
                 (A) (A) (A) (A) (A) (A) (A) (A) (A) (A) (A) (A)
                 (A) (A) (A) (A) (A) (A) (A) (A) (A) (A) (A) (A)
                 (A) (A) (A) (A) (A) (A) (A) (A) (A) (A) (A) (A)
                 (A) (A) (A) (A) (A) (A) (A) (A) (A) (A) (A) (A)
                 (A) (A) (A) (A) (A) (A) (A) (A) (A) (A) (A) (A)
                 (A) (A) (A) (A) (A) (A) (A) (A) (A) (A) (A) (A)
                 (A) (A) (A) (A) (A) (A) (A) (A) (A) (A) (A) (A)
                 (A) (A) (A) (A) (A) (A) (A) (A) (A) (A) (A) (A)
                 (A) (A) (A) (A) (A) (A) (A) (A) (A) (A) (A) (A)
                 (A) (A) (A) (A) (A) (A) (A) (A) (A) (A) (A) (A)
                 (A) (A) (A) (A) (A) (A) (A) (A) (A) (A) (A) (A)
                 (A) (A) (A) (A) (A) (A) (A) (A) (A) (A) (A) (A)
                 (A) (A) (A) (A) (A) (A) (A) (A) (A) (A) (A) (A)
                 (A) (A) (A) (A) (A) (A) (A) (A) (A) (A) (A) (A)
                 (A) (A) (A) (A) (A) (A) (A) (A) (A) (A) (A) (A)
                 (A) (A) (A) (A) (A) (A) (A) (A) (A) (A) (A) (A)
                 (A) (A) (A) (A) (A) (A) (A) (A) (A) (A) (A) (A)
                 (A) (A) (A) (A) (A) (A) (A) (A) (A) (A) (A) (A)
                 (A) (A) (A) (A) (A) (A) (A) (A) (A) (A) (A) (A)
                 (A) (A) (A) (A) (A) (A) (A) (A) (A) (A) (A) (A)
                 (A) (A) (A) (A) (A) (A) (A) (A) (A) (A) (A) (A)
                 (A) (A) (A) (A) (A) (A) (A) (A) (A) (A) (A) (A)
                 (A) (A) (A) (A) (A) (A) (A) (A) (A) (A) (A) (A)
                 (A) (A) (A) (A) (A) (A) (A) (A) (A) (A) (A) (A)
                 (A) (A) (A) (A) (A) (A) (A) (A) (A) (A) (A) (A)
                 (A) (A) (A) (A) (A) (A) (A) (A) (A) (A) (A) (A)
                 (A) (A) (A) (A) (A) (A) (A) (A) (A) (A) (A) (A)
                 (A) (A) (A) (A) (A) (A) (A) (A) (A) (A) (A) (A)
                 (A) (A) (A) (A) (A) (A) (A) (A) (A) (A) (A) (A)
                 (A) (A) (A) (A) (A) (A) (A) (A) (A) (A) (A) (A)
                 (A) (A) (A) (A) (A) (A) (A) (A) (A) (A) (A) (A)
                 (A) (A) (A) (A) (A) (A) (A) (A) (A) (A) (A) (A)
                 (A) (A) (A) (A) (A) (A) (A) (A) (A) (A) (A) (A)
                 (A) (A) (A) (A) (A) (A) (A)
 The electronic state of the initial guess is 1-A.
 Initial guess <Sx>= 0.0000 <Sy>= 0.0000 <Sz>= 0.0000 <S**2>= 0.0000 S= 0.0000
 Generating alternative initial guess.
 Harris functional with IExCor=  402 diagonalized for initial guess.
 ExpMin= 1.61D-01 ExpMax= 5.48D+03 ExpMxC= 8.25D+02 IAcc=1 IRadAn=         1 AccDes= 0.00D+00
 HarFok:  IExCor=  402 AccDes= 0.00D+00 IRadAn=         1 IDoV= 1
 ScaDFX=  1.000000  1.000000  1.000000  1.000000
 FoFCou: FMM=F IPFlag=           0 FMFlag=      100000 FMFlg1=        2001
         NFxFlg=           0 DoJE=T BraDBF=F KetDBF=T FulRan=T
         Omega=  0.000000  0.000000  1.000000  0.000000  0.000000 ICntrl=     500 IOpCl=  0
         NMat0=    1 NMatS0=    1 NMatT0=    0 NMatD0=    1 NMtDS0=    0 NMtDT0=    0
         I1Cent=           4 NGrid=           0.
 Petite list used in FoFCou.
 Harris En= -1899.38249871424    
 Leave Link  401 at Thu Oct 13 22:59:08 2016, MaxMem= 1342177280 cpu:     220.0
 (Enter /opt/software/g09/linda-exe/l502.exel)
 UHF open shell SCF:
 Requested convergence on RMS density matrix=1.00D-08 within 128 cycles.
 Requested convergence on MAX density matrix=1.00D-06.
 Requested convergence on             energy=1.00D-06.
 No special actions if energy rises.
 Using DIIS extrapolation, IDIIS=  1040.
 Integral symmetry usage will be decided dynamically.
       579700 words used for storage of precomputed grid.
 IEnd=     2216586 IEndB=     2216586 NGot=  1342177280 MDV=  1340510965
 LenX=  1340510965 LenY=  1339977335
 Fock matrices will be formed incrementally for  20 cycles.

 Cycle   1  Pass 1  IDiag  1:
 FoFCou: FMM=T IPFlag=           0 FMFlag=      100000 FMFlg1=        2001
         NFxFlg=           0 DoJE=F BraDBF=F KetDBF=F FulRan=T
         Omega=  0.000000  0.000000  1.000000  0.000000  0.000000 ICntrl=       0 IOpCl=  1
         NMat0=    1 NMatS0=    1 NMatT0=    0 NMatD0=    1 NMtDS0=    0 NMtDT0=    0
         I1Cent=           0 NGrid=           0.
 Symmetry not used in FoFCou.
 FMM levels:  10  Number of levels for PrismC:   9
 E= -1899.49210489255    
 DIIS: error= 6.58D-03 at cycle   1 NSaved=   1.
 NSaved= 1 IEnMin= 1 EnMin= -1899.49210489255     IErMin= 1 ErrMin= 6.58D-03
 ErrMax= 6.58D-03 EMaxC= 1.00D-01 BMatC= 1.66D-01 BMatP= 1.66D-01
 IDIUse=3 WtCom= 9.34D-01 WtEn= 6.58D-02
 Coeff-Com:  0.100D+01
 Coeff-En:   0.100D+01
 Coeff:      0.100D+01
 Gap=     0.171 Goal=   None    Shift=    0.000
 Gap=     0.171 Goal=   None    Shift=    0.000
 GapD=    0.171 DampG=1.000 DampE=1.000 DampFc=1.0000 IDamp=-1.
 RMSDP=4.69D-04 MaxDP=3.09D-02              OVMax= 3.45D-02

 Cycle   2  Pass 1  IDiag  1:
 RMSU=  3.31D-04    CP:  9.99D-01
 E= -1899.55537444942     Delta-E=       -0.063269556866 Rises=F Damp=F
 DIIS: error= 8.76D-04 at cycle   2 NSaved=   2.
 NSaved= 2 IEnMin= 2 EnMin= -1899.55537444942     IErMin= 2 ErrMin= 8.76D-04
 ErrMax= 8.76D-04 EMaxC= 1.00D-01 BMatC= 2.90D-03 BMatP= 1.66D-01
 IDIUse=3 WtCom= 9.91D-01 WtEn= 8.76D-03
 Coeff-Com: -0.442D-01 0.104D+01
 Coeff-En:   0.000D+00 0.100D+01
 Coeff:     -0.438D-01 0.104D+01
 Gap=     0.161 Goal=   None    Shift=    0.000
 Gap=     0.161 Goal=   None    Shift=    0.000
 RMSDP=8.78D-05 MaxDP=8.76D-03 DE=-6.33D-02 OVMax= 1.10D-02

 Cycle   3  Pass 1  IDiag  1:
 RMSU=  5.88D-05    CP:  9.99D-01  1.06D+00
 E= -1899.55524469012     Delta-E=        0.000129759305 Rises=F Damp=F
 DIIS: error= 1.03D-03 at cycle   3 NSaved=   3.
 NSaved= 3 IEnMin= 2 EnMin= -1899.55537444942     IErMin= 2 ErrMin= 8.76D-04
 ErrMax= 1.03D-03 EMaxC= 1.00D-01 BMatC= 5.50D-03 BMatP= 2.90D-03
 IDIUse=3 WtCom= 2.37D-01 WtEn= 7.63D-01
 Coeff-Com: -0.406D-01 0.635D+00 0.405D+00
 Coeff-En:   0.000D+00 0.539D+00 0.461D+00
 Coeff:     -0.963D-02 0.562D+00 0.448D+00
 Gap=     0.160 Goal=   None    Shift=    0.000
 Gap=     0.160 Goal=   None    Shift=    0.000
 RMSDP=5.75D-05 MaxDP=7.83D-03 DE= 1.30D-04 OVMax= 9.82D-03

 Cycle   4  Pass 1  IDiag  1:
 RMSU=  2.05D-05    CP:  9.99D-01  1.08D+00  4.11D-01
 E= -1899.55630335560     Delta-E=       -0.001058665483 Rises=F Damp=F
 DIIS: error= 3.02D-04 at cycle   4 NSaved=   4.
 NSaved= 4 IEnMin= 4 EnMin= -1899.55630335560     IErMin= 4 ErrMin= 3.02D-04
 ErrMax= 3.02D-04 EMaxC= 1.00D-01 BMatC= 4.63D-04 BMatP= 2.90D-03
 IDIUse=3 WtCom= 9.97D-01 WtEn= 3.02D-03
 Coeff-Com: -0.121D-01 0.149D+00 0.251D+00 0.612D+00
 Coeff-En:   0.000D+00 0.000D+00 0.555D-01 0.945D+00
 Coeff:     -0.121D-01 0.149D+00 0.251D+00 0.613D+00
 Gap=     0.160 Goal=   None    Shift=    0.000
 Gap=     0.160 Goal=   None    Shift=    0.000
 RMSDP=1.64D-05 MaxDP=2.15D-03 DE=-1.06D-03 OVMax= 3.27D-03

 Cycle   5  Pass 1  IDiag  1:
 RMSU=  6.89D-06    CP:  9.99D-01  1.08D+00  5.38D-01  7.30D-01
 E= -1899.55639340026     Delta-E=       -0.000090044663 Rises=F Damp=F
 DIIS: error= 9.52D-05 at cycle   5 NSaved=   5.
 NSaved= 5 IEnMin= 5 EnMin= -1899.55639340026     IErMin= 5 ErrMin= 9.52D-05
 ErrMax= 9.52D-05 EMaxC= 1.00D-01 BMatC= 4.97D-05 BMatP= 4.63D-04
 IDIUse=1 WtCom= 1.00D+00 WtEn= 0.00D+00
 Coeff-Com: -0.191D-02 0.459D-02 0.100D+00 0.388D+00 0.509D+00
 Coeff:     -0.191D-02 0.459D-02 0.100D+00 0.388D+00 0.509D+00
 Gap=     0.160 Goal=   None    Shift=    0.000
 Gap=     0.160 Goal=   None    Shift=    0.000
 RMSDP=5.32D-06 MaxDP=4.99D-04 DE=-9.00D-05 OVMax= 8.05D-04

 Cycle   6  Pass 1  IDiag  1:
 RMSU=  2.00D-06    CP:  9.99D-01  1.08D+00  5.42D-01  8.06D-01  5.99D-01
 E= -1899.55640459700     Delta-E=       -0.000011196743 Rises=F Damp=F
 DIIS: error= 1.89D-05 at cycle   6 NSaved=   6.
 NSaved= 6 IEnMin= 6 EnMin= -1899.55640459700     IErMin= 6 ErrMin= 1.89D-05
 ErrMax= 1.89D-05 EMaxC= 1.00D-01 BMatC= 2.46D-06 BMatP= 4.97D-05
 IDIUse=1 WtCom= 1.00D+00 WtEn= 0.00D+00
 Coeff-Com:  0.265D-03-0.136D-01 0.238D-01 0.131D+00 0.251D+00 0.607D+00
 Coeff:      0.265D-03-0.136D-01 0.238D-01 0.131D+00 0.251D+00 0.607D+00
 Gap=     0.160 Goal=   None    Shift=    0.000
 Gap=     0.160 Goal=   None    Shift=    0.000
 RMSDP=1.40D-06 MaxDP=1.01D-04 DE=-1.12D-05 OVMax= 1.57D-04

 Cycle   7  Pass 1  IDiag  1:
 RMSU=  6.69D-07    CP:  9.99D-01  1.08D+00  5.45D-01  8.16D-01  6.46D-01
                    CP:  7.08D-01
 E= -1899.55640508185     Delta-E=       -0.000000484849 Rises=F Damp=F
 DIIS: error= 6.93D-06 at cycle   7 NSaved=   7.
 NSaved= 7 IEnMin= 7 EnMin= -1899.55640508185     IErMin= 7 ErrMin= 6.93D-06
 ErrMax= 6.93D-06 EMaxC= 1.00D-01 BMatC= 4.56D-07 BMatP= 2.46D-06
 IDIUse=1 WtCom= 1.00D+00 WtEn= 0.00D+00
 Coeff-Com:  0.366D-03-0.886D-02 0.313D-02 0.361D-01 0.948D-01 0.358D+00
 Coeff-Com:  0.516D+00
 Coeff:      0.366D-03-0.886D-02 0.313D-02 0.361D-01 0.948D-01 0.358D+00
 Coeff:      0.516D+00
 Gap=     0.160 Goal=   None    Shift=    0.000
 Gap=     0.160 Goal=   None    Shift=    0.000
 RMSDP=5.39D-07 MaxDP=3.98D-05 DE=-4.85D-07 OVMax= 6.71D-05

 Cycle   8  Pass 1  IDiag  1:
 RMSU=  2.48D-07    CP:  9.99D-01  1.08D+00  5.46D-01  8.19D-01  6.51D-01
                    CP:  7.67D-01  6.20D-01
 E= -1899.55640518223     Delta-E=       -0.000000100377 Rises=F Damp=F
 DIIS: error= 3.40D-06 at cycle   8 NSaved=   8.
 NSaved= 8 IEnMin= 8 EnMin= -1899.55640518223     IErMin= 8 ErrMin= 3.40D-06
 ErrMax= 3.40D-06 EMaxC= 1.00D-01 BMatC= 4.51D-08 BMatP= 4.56D-07
 IDIUse=1 WtCom= 1.00D+00 WtEn= 0.00D+00
 Coeff-Com:  0.182D-03-0.371D-02-0.650D-03 0.732D-02 0.285D-01 0.141D+00
 Coeff-Com:  0.293D+00 0.535D+00
 Coeff:      0.182D-03-0.371D-02-0.650D-03 0.732D-02 0.285D-01 0.141D+00
 Coeff:      0.293D+00 0.535D+00
 Gap=     0.160 Goal=   None    Shift=    0.000
 Gap=     0.160 Goal=   None    Shift=    0.000
 RMSDP=1.84D-07 MaxDP=1.78D-05 DE=-1.00D-07 OVMax= 1.85D-05

 Cycle   9  Pass 1  IDiag  1:
 RMSU=  1.02D-07    CP:  9.99D-01  1.08D+00  5.46D-01  8.19D-01  6.54D-01
                    CP:  7.76D-01  6.87D-01  7.53D-01
 E= -1899.55640519103     Delta-E=       -0.000000008796 Rises=F Damp=F
 DIIS: error= 1.08D-06 at cycle   9 NSaved=   9.
 NSaved= 9 IEnMin= 9 EnMin= -1899.55640519103     IErMin= 9 ErrMin= 1.08D-06
 ErrMax= 1.08D-06 EMaxC= 1.00D-01 BMatC= 6.61D-09 BMatP= 4.51D-08
 IDIUse=1 WtCom= 1.00D+00 WtEn= 0.00D+00
 Coeff-Com:  0.327D-04-0.385D-03-0.950D-03-0.269D-02-0.201D-02 0.952D-02
 Coeff-Com:  0.666D-01 0.307D+00 0.623D+00
 Coeff:      0.327D-04-0.385D-03-0.950D-03-0.269D-02-0.201D-02 0.952D-02
 Coeff:      0.666D-01 0.307D+00 0.623D+00
 Gap=     0.160 Goal=   None    Shift=    0.000
 Gap=     0.160 Goal=   None    Shift=    0.000
 RMSDP=7.48D-08 MaxDP=6.29D-06 DE=-8.80D-09 OVMax= 1.38D-05

 Cycle  10  Pass 1  IDiag  1:
 RMSU=  3.50D-08    CP:  9.99D-01  1.08D+00  5.46D-01  8.20D-01  6.54D-01
                    CP:  7.81D-01  7.09D-01  8.45D-01  7.53D-01
 E= -1899.55640519250     Delta-E=       -0.000000001471 Rises=F Damp=F
 DIIS: error= 3.76D-07 at cycle  10 NSaved=  10.
 NSaved=10 IEnMin=10 EnMin= -1899.55640519250     IErMin=10 ErrMin= 3.76D-07
 ErrMax= 3.76D-07 EMaxC= 1.00D-01 BMatC= 7.92D-10 BMatP= 6.61D-09
 IDIUse=1 WtCom= 1.00D+00 WtEn= 0.00D+00
 Coeff-Com: -0.238D-05 0.216D-03-0.433D-03-0.225D-02-0.427D-02-0.108D-01
 Coeff-Com:  0.354D-02 0.107D+00 0.342D+00 0.565D+00
 Coeff:     -0.238D-05 0.216D-03-0.433D-03-0.225D-02-0.427D-02-0.108D-01
 Coeff:      0.354D-02 0.107D+00 0.342D+00 0.565D+00
 Gap=     0.160 Goal=   None    Shift=    0.000
 Gap=     0.160 Goal=   None    Shift=    0.000
 RMSDP=2.56D-08 MaxDP=1.38D-06 DE=-1.47D-09 OVMax= 3.54D-06

 Cycle  11  Pass 1  IDiag  1:
 RMSU=  1.12D-08    CP:  9.99D-01  1.08D+00  5.46D-01  8.20D-01  6.54D-01
                    CP:  7.82D-01  7.11D-01  8.68D-01  8.25D-01  7.05D-01
 E= -1899.55640519267     Delta-E=       -0.000000000168 Rises=F Damp=F
 DIIS: error= 9.24D-08 at cycle  11 NSaved=  11.
 NSaved=11 IEnMin=11 EnMin= -1899.55640519267     IErMin=11 ErrMin= 9.24D-08
 ErrMax= 9.24D-08 EMaxC= 1.00D-01 BMatC= 6.98D-11 BMatP= 7.92D-10
 IDIUse=1 WtCom= 1.00D+00 WtEn= 0.00D+00
 Coeff-Com: -0.469D-05 0.154D-03-0.118D-03-0.860D-03-0.195D-02-0.666D-02
 Coeff-Com: -0.561D-02 0.211D-01 0.107D+00 0.284D+00 0.603D+00
 Coeff:     -0.469D-05 0.154D-03-0.118D-03-0.860D-03-0.195D-02-0.666D-02
 Coeff:     -0.561D-02 0.211D-01 0.107D+00 0.284D+00 0.603D+00
 Gap=     0.160 Goal=   None    Shift=    0.000
 Gap=     0.160 Goal=   None    Shift=    0.000
 RMSDP=8.07D-09 MaxDP=6.23D-07 DE=-1.68D-10 OVMax= 1.68D-06

 Error on total polarization charges =  0.01305
 SCF Done:  E(UB3LYP) =  -1899.55640519     A.U. after   11 cycles
             Convg  =    0.8065D-08             -V/T =  2.0068
 <Sx>= 0.0000 <Sy>= 0.0000 <Sz>= 0.0000 <S**2>= 0.0000 S= 0.0000
 <L.S>= 0.000000000000E+00
 KE= 1.886729646097D+03 PE=-1.276994158591D+04 EE= 4.815891955690D+03
 Annihilation of the first spin contaminant:
 S**2 before annihilation     0.0000,   after     0.0000
 Leave Link  502 at Thu Oct 13 23:05:11 2016, MaxMem= 1342177280 cpu:    6800.3
 (Enter /opt/software/g09/linda-exe/l701.exel)
 Compute integral first derivatives.
 ... and contract with generalized density number  0.
   1 Symmetry operations used in ECPInt.
 ECPInt:  NShTT=   28441 NPrTT=  163533 LenC2=   15717 LenP2D=   48324.
 LDataN:  DoStor=T MaxTD1= 5 Len=  102
 D1PCM: PCM CHGder 1st derivatives, ID1Alg=3 FixD1E=F DoIter=F DoCFld=F I1PDM=0.
 GePol: Maximum number of non-zero 1st derivatives   =     197
 Leave Link  701 at Thu Oct 13 23:05:23 2016, MaxMem= 1342177280 cpu:     210.7
 (Enter /opt/software/g09/l702.exe)
 L702 exits ... SP integral derivatives will be done elsewhere.
 Leave Link  702 at Thu Oct 13 23:05:23 2016, MaxMem= 1342177280 cpu:       0.3
 (Enter /opt/software/g09/linda-exe/l703.exel)
 Compute integral first derivatives, UseDBF=F ICtDFT=           0.
 Integral derivatives from FoFDir, PRISM(SPDF).
 Calling FoFJK, ICntrl=      2127 FMM=T ISym2X=0 I1Cent= 0 IOpClX= 1 NMat=1 NMatS=1 NMatT=0.
 FoFCou: FMM=T IPFlag=           0 FMFlag=      100000 FMFlg1=        2001
         NFxFlg=           0 DoJE=F BraDBF=F KetDBF=F FulRan=T
         Omega=  0.000000  0.000000  1.000000  0.000000  0.000000 ICntrl=    2127 IOpCl=  1
         NMat0=    1 NMatS0=    1 NMatT0=    0 NMatD0=    1 NMtDS0=    0 NMtDT0=    0
         I1Cent=           0 NGrid=           0.
 Symmetry not used in FoFCou.
 FMM levels:  10  Number of levels for PrismC:   9
 Leave Link  703 at Thu Oct 13 23:05:46 2016, MaxMem= 1342177280 cpu:     420.0
 (Enter /opt/software/g09/l716.exe)
 Dipole        =-4.26126241D-01 2.87007332D+00 1.32282756D+00
 ***** Axes restored to original set *****
 -------------------------------------------------------------------
 Center     Atomic                   Forces (Hartrees/Bohr)
 Number     Number              X              Y              Z
 -------------------------------------------------------------------
      1        8          -0.000496228    0.000047002   -0.004066399
      2        6          -0.003326575   -0.001012560    0.004207733
      3        6          -0.005198773    0.000007029    0.001795170
      4        6          -0.000293431   -0.000277494   -0.000399750
      5        6          -0.004243402   -0.002684972   -0.001764917
      6        8          -0.001093249   -0.000158038   -0.000327584
      7        6          -0.000478083   -0.000217074   -0.002814496
      8        6          -0.010028383    0.005474804    0.034567003
      9        8           0.016042727   -0.009660327   -0.009196670
     10        8           0.000061915    0.000175573    0.002675426
     11        7          -0.000521540   -0.000295133    0.000364869
     12        7           0.003946011   -0.000164234    0.000032491
     13        7           0.003081332    0.001048877   -0.004675491
     14        6          -0.004264351    0.000212970   -0.002487561
     15        6           0.000488827    0.000857990   -0.003629563
     16        6          -0.003080326    0.000357093   -0.002428746
     17        6          -0.000258161    0.000015703   -0.000237872
     18        6          -0.000988653   -0.000140854    0.000874341
     19        6           0.001730737    0.000361039   -0.002668646
     20        6           0.003071601    0.001251277   -0.006447396
     21        7          -0.000805394    0.000181385    0.000103056
     22        6           0.001331747    0.000007752   -0.000192965
     23        6          -0.000234502   -0.000004442    0.000124039
     24        6           0.000002044    0.000190095   -0.000101394
     25        6          -0.000501507    0.000085313   -0.000227820
     26        6          -0.000025529   -0.000002761   -0.000302367
     27        6           0.000364226   -0.000128548    0.000000390
     28        6           0.000367963   -0.000187084    0.000328042
     29        8           0.000007161   -0.000374206    0.000566426
     30        7          -0.005309506    0.025703063    0.009178712
     31        7           0.000227400    0.005949645   -0.001900920
     32        6           0.023061609   -0.004899098    0.001014182
     33        6          -0.002620613    0.000636703    0.002129032
     34        6          -0.000258994   -0.000270813   -0.000957663
     35        6          -0.000289112   -0.000227357   -0.000714631
     36        6          -0.000061236    0.000151662    0.000278961
     37        6           0.000055579    0.000201567    0.000812416
     38        6           0.004336461   -0.000235872   -0.000736079
     39        8          -0.003691003   -0.000535907   -0.002040820
     40        1           0.000352820   -0.000103975   -0.000154920
     41        1          -0.000786505    0.001026547    0.000355612
     42        1           0.000943513   -0.000709945    0.000207954
     43        1          -0.000124548   -0.002118342    0.000259487
     44        1           0.002076095    0.000662283   -0.000781146
     45        1           0.000720413    0.000777038   -0.000079584
     46        1           0.003906496   -0.000182824    0.001875390
     47        1          -0.000058843   -0.000349023    0.001732687
     48        1           0.000153249   -0.000014157    0.000014882
     49        1           0.000140411    0.000009865   -0.000042822
     50        1           0.000136335   -0.000099640    0.000456481
     51        1          -0.000287293    0.000088795   -0.000217411
     52        1           0.000163197    0.000034976    0.000151696
     53        1          -0.000040078    0.000025041    0.000056999
     54        1           0.000024880    0.000007198    0.000080115
     55        1           0.000010971    0.000049185   -0.000062809
     56        1          -0.000324481    0.000245903   -0.000443753
     57        1           0.002762768   -0.018794894   -0.027716834
     58        1          -0.016326945   -0.001295021   -0.007469951
     59        1           0.000125268    0.000003192    0.000142086
     60        1          -0.000177646   -0.000014265    0.000000273
     61        1          -0.000086596   -0.000009115   -0.000058033
     62        1           0.000119897    0.000020164    0.000130003
     63        1          -0.001920622    0.002037075    0.005448392
     64        8          -0.000451233   -0.002773214    0.012975538
     65        1          -0.003726149    0.000600535   -0.001196197
     66        1           0.002565842   -0.000563151    0.003603326
 -------------------------------------------------------------------
 Cartesian Forces:  Max     0.034567003 RMS     0.005131992
 Leave Link  716 at Thu Oct 13 23:05:46 2016, MaxMem= 1342177280 cpu:       0.3
 (Enter /opt/software/g09/l103.exe)

 GradGradGradGradGradGradGradGradGradGradGradGradGradGradGradGradGradGrad
 Berny optimization.
 Using GEDIIS/GDIIS optimizer.
 Internal  Forces:  Max     0.022260158 RMS     0.003092511
 Search for a local minimum.
 Step number   4 out of a maximum of  343
 All quantities printed in internal units (Hartrees-Bohrs-Radians)
 RMS Force = .30925D-02 SwitMx=.10000D-02 MixMth= 1
 Mixed Optimization -- RFO/linear search
 Update second derivatives using D2CorX and points    3    4
 DE= -2.85D-02 DEPred=-2.52D-02 R= 1.13D+00
 SS=  1.41D+00  RLast= 5.05D-01 DXNew= 8.4853D-01 1.5140D+00
 Trust test= 1.13D+00 RLast= 5.05D-01 DXMaxT set to 8.49D-01
 ITU=  1  0  1  0
 Use linear search instead of GDIIS.
     Eigenvalues ---    0.00230   0.00230   0.00456   0.00525   0.00600
     Eigenvalues ---    0.01061   0.01206   0.01236   0.01295   0.01309
     Eigenvalues ---    0.01379   0.01395   0.01617   0.01707   0.01708
     Eigenvalues ---    0.01735   0.01741   0.01802   0.01862   0.01878
     Eigenvalues ---    0.01888   0.01920   0.01937   0.01939   0.01962
     Eigenvalues ---    0.01981   0.01989   0.02012   0.02033   0.02089
     Eigenvalues ---    0.02091   0.02093   0.02098   0.02099   0.02108
     Eigenvalues ---    0.02116   0.02129   0.02130   0.02134   0.02146
     Eigenvalues ---    0.02159   0.02160   0.02163   0.02166   0.02166
     Eigenvalues ---    0.02184   0.02186   0.02188   0.02189   0.02213
     Eigenvalues ---    0.02262   0.02437   0.03137   0.03178   0.03188
     Eigenvalues ---    0.03217   0.03291   0.04076   0.04326   0.04810
     Eigenvalues ---    0.05180   0.05825   0.06074   0.07184   0.07261
     Eigenvalues ---    0.08707   0.09008   0.09333   0.09779   0.12699
     Eigenvalues ---    0.12865   0.14009   0.15967   0.15973   0.16000
     Eigenvalues ---    0.16000   0.16000   0.16000   0.16000   0.16000
     Eigenvalues ---    0.16000   0.16000   0.16000   0.16000   0.16000
     Eigenvalues ---    0.16000   0.16000   0.16000   0.16006   0.16032
     Eigenvalues ---    0.16136   0.16258   0.16556   0.17491   0.17771
     Eigenvalues ---    0.21896   0.21995   0.22000   0.22000   0.22000
     Eigenvalues ---    0.22009   0.22021   0.22146   0.22280   0.22471
     Eigenvalues ---    0.22485   0.22491   0.23006   0.23583   0.24117
     Eigenvalues ---    0.24335   0.24469   0.24477   0.24506   0.24987
     Eigenvalues ---    0.24991   0.24999   0.24999   0.25000   0.25000
     Eigenvalues ---    0.25000   0.25000   0.25021   0.27123   0.27261
     Eigenvalues ---    0.27424   0.29819   0.30459   0.33541   0.33792
     Eigenvalues ---    0.33940   0.34112   0.34351   0.34816   0.34970
     Eigenvalues ---    0.34974   0.35021   0.35076   0.35129   0.35154
     Eigenvalues ---    0.35221   0.35267   0.35288   0.35377   0.35379
     Eigenvalues ---    0.35394   0.35408   0.36324   0.36446   0.37103
     Eigenvalues ---    0.37250   0.37960   0.39484   0.40644   0.40662
     Eigenvalues ---    0.41021   0.41489   0.41554   0.41588   0.42040
     Eigenvalues ---    0.43729   0.44121   0.44190   0.44353   0.44519
     Eigenvalues ---    0.44941   0.45506   0.45564   0.45671   0.46247
     Eigenvalues ---    0.46300   0.46492   0.46884   0.46952   0.47245
     Eigenvalues ---    0.48989   0.49087   0.51397   0.52417   0.52604
     Eigenvalues ---    0.52816   0.53351   0.53589   0.54025   0.55451
     Eigenvalues ---    0.58010   0.69888   0.71622   0.74403   0.86817
     Eigenvalues ---    0.91625   0.94396
 RFO step:  Lambda=-2.42162034D-02 EMin= 2.29986936D-03
 Quartic linear search produced a step of  0.71855.
 Iteration  1 RMS(Cart)=  0.18563991 RMS(Int)=  0.01714066
 Iteration  2 RMS(Cart)=  0.02955978 RMS(Int)=  0.00387510
 Iteration  3 RMS(Cart)=  0.00183112 RMS(Int)=  0.00373579
 Iteration  4 RMS(Cart)=  0.00004817 RMS(Int)=  0.00373576
 Iteration  5 RMS(Cart)=  0.00000186 RMS(Int)=  0.00373576
 Iteration  6 RMS(Cart)=  0.00000007 RMS(Int)=  0.00373576
[truncated: 2,271,419 more chars]
