# Supplementary material for: A multi-stimuli responsive conductive sonometallogel: a mechanistic insight into the role of ultrasound in gelation
Source: Royal Society of Chemistry journal article supplement (doi:10.1039/c7ta00854f), 2017-01-01
Supplement: c7ta00854f2.log [file c7ta00854f2.log]

 Entering Gaussian System, Link 0=/opt/software/g09/g09
 Input=./36397.MD1ASS
 Output=./MD1ASS.log
 Initial command:
 /opt/software/g09/l1.exe /scratch/pritamm/gauss_scratch/Gau-30545.inp -scrdir=/scratch/pritamm/gauss_scratch/
 Entering Link 1 = /opt/software/g09/l1.exe PID=     30546.
  
 Copyright (c) 1988,1990,1992,1993,1995,1998,2003,2009,2010,
            Gaussian, Inc.  All Rights Reserved.
  
 This is part of the Gaussian(R) 09 program.  It is based on
 the Gaussian(R) 03 system (copyright 2003, Gaussian, Inc.),
 the Gaussian(R) 98 system (copyright 1998, Gaussian, Inc.),
 the Gaussian(R) 94 system (copyright 1995, Gaussian, Inc.),
 the Gaussian 92(TM) system (copyright 1992, Gaussian, Inc.),
 the Gaussian 90(TM) system (copyright 1990, Gaussian, Inc.),
 the Gaussian 88(TM) system (copyright 1988, Gaussian, Inc.),
 the Gaussian 86(TM) system (copyright 1986, Carnegie Mellon
 University), and the Gaussian 82(TM) system (copyright 1983,
 Carnegie Mellon University). Gaussian is a federally registered
 trademark of Gaussian, Inc.
  
 This software contains proprietary and confidential information,
 including trade secrets, belonging to Gaussian, Inc.
  
 This software is provided under written license and may be
 used, copied, transmitted, or stored only in accord with that
 written license.
  
 The following legend is applicable only to US Government
 contracts under FAR:
  
                    RESTRICTED RIGHTS LEGEND
  
 Use, reproduction and disclosure by the US Government is
 subject to restrictions as set forth in subparagraphs (a)
 and (c) of the Commercial Computer Software - Restricted
 Rights clause in FAR 52.227-19.
  
 Gaussian, Inc.
 340 Quinnipiac St., Bldg. 40, Wallingford CT 06492
  
  
 ---------------------------------------------------------------
 Warning -- This program may not be used in any manner that
 competes with the business of Gaussian, Inc. or will provide
 assistance to any competitor of Gaussian, Inc.  The licensee
 of this program is prohibited from giving any competitor of
 Gaussian, Inc. access to this program.  By using this program,
 the user acknowledges that Gaussian, Inc. is engaged in the
 business of creating and licensing software in the field of
 computational chemistry and represents and warrants to the
 licensee that it is not a competitor of Gaussian, Inc. and that
 it will not use this program in any manner prohibited above.
 ---------------------------------------------------------------
  

 Cite this work as:
 Gaussian 09, Revision B.01,
 M. J. Frisch, G. W. Trucks, H. B. Schlegel, G. E. Scuseria, 
 M. A. Robb, J. R. Cheeseman, G. Scalmani, V. Barone, B. Mennucci, 
 G. A. Petersson, H. Nakatsuji, M. Caricato, X. Li, H. P. Hratchian, 
 A. F. Izmaylov, J. Bloino, G. Zheng, J. L. Sonnenberg, M. Hada, 
 M. Ehara, K. Toyota, R. Fukuda, J. Hasegawa, M. Ishida, T. Nakajima, 
 Y. Honda, O. Kitao, H. Nakai, T. Vreven, J. A. Montgomery, Jr., 
 J. E. Peralta, F. Ogliaro, M. Bearpark, J. J. Heyd, E. Brothers, 
 K. N. Kudin, V. N. Staroverov, T. Keith, R. Kobayashi, J. Normand, 
 K. Raghavachari, A. Rendell, J. C. Burant, S. S. Iyengar, J. Tomasi, 
 M. Cossi, N. Rega, J. M. Millam, M. Klene, J. E. Knox, J. B. Cross, 
 V. Bakken, C. Adamo, J. Jaramillo, R. Gomperts, R. E. Stratmann, 
 O. Yazyev, A. J. Austin, R. Cammi, C. Pomelli, J. W. Ochterski, 
 R. L. Martin, K. Morokuma, V. G. Zakrzewski, G. A. Voth, 
 P. Salvador, J. J. Dannenberg, S. Dapprich, A. D. Daniels, 
 O. Farkas, J. B. Foresman, J. V. Ortiz, J. Cioslowski, 
 and D. J. Fox, Gaussian, Inc., Wallingford CT, 2010.
 
 ******************************************
 Gaussian 09:  AM64L-G09RevB.01 12-Aug-2010
                13-Oct-2016 
 ******************************************
 %NProcShared=20
 Will use up to   20 processors via shared memory.
 %LindaWorkers=hpc522:1,hpc526:1,hpc520:1
 SetLPE:  input flags=""
 SetLPE:    new flags=" -nodelist 'hpc522 hpc526 hpc520'"
 Will use up to    3 processors via Linda.
 %chk=MD1ASS.chk
 %mem=10GB
 ----------------------------------------------------------------------
 #p opt freq ub3lyp/genecp scrf=(solvent=water) pseudo=read geom=connec
 tivity scf=Maxcycle=600
 ----------------------------------------------------------------------
 1/14=-1,18=20,19=15,26=3,38=1,57=2/1,3;
 2/9=110,12=2,17=6,18=5,40=1/2;
 3/5=7,11=2,16=1,17=8,25=1,30=1,70=2201,71=1,72=1,74=-5,116=2/1,2,3;
 4//1;
 5/5=2,7=600,38=5,53=1/2;
 6/7=2,8=2,9=2,10=2,28=1/1;
 7//1,2,3,16;
 1/14=-1,18=20,19=15/3(2);
 2/9=110/2;
 99//99;
 2/9=110/2;
 3/5=7,6=1,11=2,16=1,17=8,25=1,30=1,70=2205,71=1,72=1,74=-5,82=7,116=2/1,2,3;
 4/5=5,16=3/1;
 5/5=2,7=600,38=5,53=1/2;
 7//1,2,3,16;
 1/14=-1,18=20,19=15/3(-5);
 2/9=110/2;
 6/7=2,8=2,9=2,10=2,19=2,28=1/1;
 99/9=1/99;
 Leave Link    1 at Thu Oct 13 22:32:55 2016, MaxMem= 1342177280 cpu:       2.3
 (Enter /opt/software/g09/l101.exe)
 -------------------------
 geometry optimisation MD2
 -------------------------
 Symbolic Z-matrix:
 Charge =  0 Multiplicity = 1
 O                     0.        0.        0. 
 C                     0.        0.        1.42847 
 C                     1.46164   0.        1.95231 
 C                    -0.66336   1.28555   1.99587 
 C                    -0.65773  -1.3034    1.95976 
 O                     1.69117  -0.09807   3.15559 
 C                    -2.00728   1.57999   1.35883 
 C                    -2.12055  -1.47537   1.56968 
 O                    -3.05037  -1.31849   2.34276 
 O                    -2.18634   1.4716    0.13634 
 N                    -3.026     2.00825   2.15262 
 N                     2.38847   0.13011   0.96219 
 N                     3.76296   0.16923   1.00145 
 C                     4.42491   0.30224  -0.09862 
 C                     5.88769   0.35673  -0.14172 
 C                     6.47361   0.50668  -1.41312 
 C                     7.85016   0.57462  -1.59944 
 C                     8.68917   0.49165  -0.4872 
 C                     8.14352   0.34282   0.78587 
 C                     6.75773   0.27421   0.97446 
 N                    -2.90446   2.10418   3.50545 
 C                    -3.96936   2.40151   4.15969 
 C                    -4.03604   2.54415   5.61009 
 C                    -2.94306   2.35161   6.49219 
 C                    -3.12757   2.50433   7.87118 
 C                    -4.37305   2.84525   8.39331 
 C                    -5.46103   3.03997   7.54006 
 C                    -5.2807    2.88768   6.17016 
 O                    -1.73373   2.0213    5.97306 
 N                    -2.28835  -1.84167   0.244 
 N                    -3.54376  -1.92541  -0.27037 
 C                    -3.69716  -2.2665   -1.50432 
 C                    -5.02173  -2.36639  -2.09191 
 C                    -5.15839  -2.75685  -3.43765 
 C                    -6.40458  -2.85866  -4.0397 
 C                    -7.5507   -2.56417  -3.28794 
 C                    -7.44842  -2.17428  -1.95791 
 C                    -6.193    -2.06894  -1.3399 
 O                    -6.15342  -1.68483  -0.05285 
 H                    -0.75029   0.58227  -0.27002 
 H                    -0.01731   2.13788   1.74876 
 H                    -0.73329   1.22991   3.0808 
 H                    -0.5977   -1.3198    3.04796 
 H                    -0.07166  -2.14322   1.56919 
 H                    -3.92716   2.13364   1.68948 
 H                     2.01172   0.19319   0.0254 
 H                     3.92367   0.38333  -1.06077 
 H                     8.26312   0.69095  -2.59619 
 H                     9.7677    0.54233  -0.60479 
 H                     8.79689   0.27808   1.65425 
 H                    -4.92085   2.56281   3.6339 
 H                    -2.28006   2.35206   8.53656 
 H                    -4.48978   2.95707   9.46714 
 H                    -6.43513   3.30421   7.93796 
 H                    -6.12304   3.03274   5.49849 
 H                    -1.10474   1.89223   6.69592 
 H                    -1.48861  -1.79207  -0.38556 
 H                    -2.83659  -2.48686  -2.14872 
 H                    -4.25865  -2.98056  -4.00647 
 H                    -6.48944  -3.16197  -5.07814 
 H                    -8.53283  -2.64009  -3.74632 
 H                    -8.32745  -1.94332  -1.36521 
 H                    -5.21023  -1.66118   0.24399 
 O                     6.22094   0.12111   2.29101 
 H                     6.93941   0.04751   2.92346 
 H                     5.83503   0.57086  -2.26928 
 
 NAtoms=     66 NQM=     66 NQMF=      0 NMic=      0 NMicF=      0 NTot=     66.
                    Isotopes and Nuclear Properties:
 (Nuclear quadrupole moments (NQMom) in fm**2, nuclear magnetic moments (NMagM)
  in nuclear magnetons)

  Atom         1           2           3           4           5           6           7           8           9          10
 IAtWgt=          16          12          12          12          12          16          12          12          16          16
 AtmWgt=  15.9949146  12.0000000  12.0000000  12.0000000  12.0000000  15.9949146  12.0000000  12.0000000  15.9949146  15.9949146
 NucSpn=           0           0           0           0           0           0           0           0           0           0
 AtZEff=   0.0000000   0.0000000   0.0000000   0.0000000   0.0000000   0.0000000   0.0000000   0.0000000   0.0000000   0.0000000
 NQMom=    0.0000000   0.0000000   0.0000000   0.0000000   0.0000000   0.0000000   0.0000000   0.0000000   0.0000000   0.0000000
 NMagM=    0.0000000   0.0000000   0.0000000   0.0000000   0.0000000   0.0000000   0.0000000   0.0000000   0.0000000   0.0000000

  Atom        11          12          13          14          15          16          17          18          19          20
 IAtWgt=          14          14          14          12          12          12          12          12          12          12
 AtmWgt=  14.0030740  14.0030740  14.0030740  12.0000000  12.0000000  12.0000000  12.0000000  12.0000000  12.0000000  12.0000000
 NucSpn=           2           2           2           0           0           0           0           0           0           0
 AtZEff=   0.0000000   0.0000000   0.0000000   0.0000000   0.0000000   0.0000000   0.0000000   0.0000000   0.0000000   0.0000000
 NQMom=    2.0440000   2.0440000   2.0440000   0.0000000   0.0000000   0.0000000   0.0000000   0.0000000   0.0000000   0.0000000
 NMagM=    0.4037610   0.4037610   0.4037610   0.0000000   0.0000000   0.0000000   0.0000000   0.0000000   0.0000000   0.0000000

  Atom        21          22          23          24          25          26          27          28          29          30
 IAtWgt=          14          12          12          12          12          12          12          12          16          14
 AtmWgt=  14.0030740  12.0000000  12.0000000  12.0000000  12.0000000  12.0000000  12.0000000  12.0000000  15.9949146  14.0030740
 NucSpn=           2           0           0           0           0           0           0           0           0           2
 AtZEff=   0.0000000   0.0000000   0.0000000   0.0000000   0.0000000   0.0000000   0.0000000   0.0000000   0.0000000   0.0000000
 NQMom=    2.0440000   0.0000000   0.0000000   0.0000000   0.0000000   0.0000000   0.0000000   0.0000000   0.0000000   2.0440000
 NMagM=    0.4037610   0.0000000   0.0000000   0.0000000   0.0000000   0.0000000   0.0000000   0.0000000   0.0000000   0.4037610

  Atom        31          32          33          34          35          36          37          38          39          40
 IAtWgt=          14          12          12          12          12          12          12          12          16           1
 AtmWgt=  14.0030740  12.0000000  12.0000000  12.0000000  12.0000000  12.0000000  12.0000000  12.0000000  15.9949146   1.0078250
 NucSpn=           2           0           0           0           0           0           0           0           0           1
 AtZEff=   0.0000000   0.0000000   0.0000000   0.0000000   0.0000000   0.0000000   0.0000000   0.0000000   0.0000000   0.0000000
 NQMom=    2.0440000   0.0000000   0.0000000   0.0000000   0.0000000   0.0000000   0.0000000   0.0000000   0.0000000   0.0000000
 NMagM=    0.4037610   0.0000000   0.0000000   0.0000000   0.0000000   0.0000000   0.0000000   0.0000000   0.0000000   2.7928460

  Atom        41          42          43          44          45          46          47          48          49          50
 IAtWgt=           1           1           1           1           1           1           1           1           1           1
 AtmWgt=   1.0078250   1.0078250   1.0078250   1.0078250   1.0078250   1.0078250   1.0078250   1.0078250   1.0078250   1.0078250
 NucSpn=           1           1           1           1           1           1           1           1           1           1
 AtZEff=   0.0000000   0.0000000   0.0000000   0.0000000   0.0000000   0.0000000   0.0000000   0.0000000   0.0000000   0.0000000
 NQMom=    0.0000000   0.0000000   0.0000000   0.0000000   0.0000000   0.0000000   0.0000000   0.0000000   0.0000000   0.0000000
 NMagM=    2.7928460   2.7928460   2.7928460   2.7928460   2.7928460   2.7928460   2.7928460   2.7928460   2.7928460   2.7928460

  Atom        51          52          53          54          55          56          57          58          59          60
 IAtWgt=           1           1           1           1           1           1           1           1           1           1
 AtmWgt=   1.0078250   1.0078250   1.0078250   1.0078250   1.0078250   1.0078250   1.0078250   1.0078250   1.0078250   1.0078250
 NucSpn=           1           1           1           1           1           1           1           1           1           1
 AtZEff=   0.0000000   0.0000000   0.0000000   0.0000000   0.0000000   0.0000000   0.0000000   0.0000000   0.0000000   0.0000000
 NQMom=    0.0000000   0.0000000   0.0000000   0.0000000   0.0000000   0.0000000   0.0000000   0.0000000   0.0000000   0.0000000
 NMagM=    2.7928460   2.7928460   2.7928460   2.7928460   2.7928460   2.7928460   2.7928460   2.7928460   2.7928460   2.7928460

  Atom        61          62          63          64          65          66
 IAtWgt=           1           1           1          16           1           1
 AtmWgt=   1.0078250   1.0078250   1.0078250  15.9949146   1.0078250   1.0078250
 NucSpn=           1           1           1           0           1           1
 AtZEff=   0.0000000   0.0000000   0.0000000   0.0000000   0.0000000   0.0000000
 NQMom=    0.0000000   0.0000000   0.0000000   0.0000000   0.0000000   0.0000000
 NMagM=    2.7928460   2.7928460   2.7928460   0.0000000   2.7928460   2.7928460
 Leave Link  101 at Thu Oct 13 22:32:56 2016, MaxMem= 1342177280 cpu:       1.5
 (Enter /opt/software/g09/l103.exe)

 GradGradGradGradGradGradGradGradGradGradGradGradGradGradGradGradGradGrad
 Berny optimization.
 Initialization pass.
                           ----------------------------
                           !    Initial Parameters    !
                           ! (Angstroms and Degrees)  !
 --------------------------                            --------------------------
 ! Name  Definition              Value          Derivative Info.                !
 --------------------------------------------------------------------------------
 ! R1    R(1,2)                  1.4285         estimate D2E/DX2                !
 ! R2    R(1,40)                 0.9874         estimate D2E/DX2                !
 ! R3    R(2,3)                  1.5527         estimate D2E/DX2                !
 ! R4    R(2,4)                  1.5539         estimate D2E/DX2                !
 ! R5    R(2,5)                  1.5536         estimate D2E/DX2                !
 ! R6    R(3,6)                  1.2289         estimate D2E/DX2                !
 ! R7    R(3,12)                 1.3625         estimate D2E/DX2                !
 ! R8    R(4,7)                  1.5161         estimate D2E/DX2                !
 ! R9    R(4,41)                 1.0977         estimate D2E/DX2                !
 ! R10   R(4,42)                 1.0886         estimate D2E/DX2                !
 ! R11   R(5,8)                  1.5237         estimate D2E/DX2                !
 ! R12   R(5,43)                 1.09           estimate D2E/DX2                !
 ! R13   R(5,44)                 1.0961         estimate D2E/DX2                !
 ! R14   R(7,10)                 1.2403         estimate D2E/DX2                !
 ! R15   R(7,11)                 1.3606         estimate D2E/DX2                !
 ! R16   R(8,9)                  1.2194         estimate D2E/DX2                !
 ! R17   R(8,30)                 1.3856         estimate D2E/DX2                !
 ! R18   R(10,40)                1.7373         estimate D2E/DX2                !
 ! R19   R(11,21)                1.3617         estimate D2E/DX2                !
 ! R20   R(11,45)                1.0209         estimate D2E/DX2                !
 ! R21   R(12,13)                1.3756         estimate D2E/DX2                !
 ! R22   R(12,46)                1.0117         estimate D2E/DX2                !
 ! R23   R(13,14)                1.2907         estimate D2E/DX2                !
 ! R24   R(14,15)                1.4644         estimate D2E/DX2                !
 ! R25   R(14,47)                1.0879         estimate D2E/DX2                !
 ! R26   R(15,16)                1.4079         estimate D2E/DX2                !
 ! R27   R(15,20)                1.4176         estimate D2E/DX2                !
 ! R28   R(16,17)                1.3908         estimate D2E/DX2                !
 ! R29   R(16,66)                1.07           estimate D2E/DX2                !
 ! R30   R(17,18)                1.3957         estimate D2E/DX2                !
 ! R31   R(17,48)                1.0852         estimate D2E/DX2                !
 ! R32   R(18,19)                1.393          estimate D2E/DX2                !
 ! R33   R(18,49)                1.0861         estimate D2E/DX2                !
 ! R34   R(19,20)                1.4002         estimate D2E/DX2                !
 ! R35   R(19,50)                1.0887         estimate D2E/DX2                !
 ! R36   R(20,64)                1.43           estimate D2E/DX2                !
 ! R37   R(21,22)                1.2847         estimate D2E/DX2                !
 ! R38   R(22,23)                1.4589         estimate D2E/DX2                !
 ! R39   R(22,51)                1.099          estimate D2E/DX2                !
 ! R40   R(23,24)                1.4177         estimate D2E/DX2                !
 ! R41   R(23,28)                1.4074         estimate D2E/DX2                !
 ! R42   R(24,25)                1.3996         estimate D2E/DX2                !
 ! R43   R(24,29)                1.3569         estimate D2E/DX2                !
 ! R44   R(25,26)                1.3929         estimate D2E/DX2                !
 ! R45   R(25,52)                1.0882         estimate D2E/DX2                !
 ! R46   R(26,27)                1.3963         estimate D2E/DX2                !
 ! R47   R(26,53)                1.0859         estimate D2E/DX2                !
 ! R48   R(27,28)                1.3901         estimate D2E/DX2                !
 ! R49   R(27,54)                1.0849         estimate D2E/DX2                !
 ! R50   R(28,55)                1.0871         estimate D2E/DX2                !
 ! R51   R(29,56)                0.9669         estimate D2E/DX2                !
 ! R52   R(30,31)                1.3593         estimate D2E/DX2                !
 ! R53   R(30,57)                1.019          estimate D2E/DX2                !
 ! R54   R(31,32)                1.2894         estimate D2E/DX2                !
 ! R55   R(31,63)                1.7639         estimate D2E/DX2                !
 ! R56   R(32,33)                1.4525         estimate D2E/DX2                !
 ! R57   R(32,58)                1.0974         estimate D2E/DX2                !
 ! R58   R(33,34)                1.4079         estimate D2E/DX2                !
 ! R59   R(33,38)                1.4233         estimate D2E/DX2                !
 ! R60   R(34,35)                1.3877         estimate D2E/DX2                !
 ! R61   R(34,59)                1.0877         estimate D2E/DX2                !
 ! R62   R(35,36)                1.4019         estimate D2E/DX2                !
 ! R63   R(35,60)                1.0852         estimate D2E/DX2                !
 ! R64   R(36,37)                1.3898         estimate D2E/DX2                !
 ! R65   R(36,61)                1.0865         estimate D2E/DX2                !
 ! R66   R(37,38)                1.4033         estimate D2E/DX2                !
 ! R67   R(37,62)                1.085          estimate D2E/DX2                !
 ! R68   R(38,39)                1.3437         estimate D2E/DX2                !
 ! R69   R(39,63)                0.9891         estimate D2E/DX2                !
 ! R70   R(64,65)                0.96           estimate D2E/DX2                !
 ! A1    A(2,1,40)             105.8711         estimate D2E/DX2                !
 ! A2    A(1,2,3)              109.7175         estimate D2E/DX2                !
 ! A3    A(1,2,4)              111.4164         estimate D2E/DX2                !
 ! A4    A(1,2,5)              109.9972         estimate D2E/DX2                !
 ! A5    A(3,2,4)              106.1811         estimate D2E/DX2                !
 ! A6    A(3,2,5)              106.4486         estimate D2E/DX2                !
 ! A7    A(4,2,5)              112.8587         estimate D2E/DX2                !
 ! A8    A(2,3,6)              120.4094         estimate D2E/DX2                !
 ! A9    A(2,3,12)             113.2782         estimate D2E/DX2                !
 ! A10   A(6,3,12)             126.3087         estimate D2E/DX2                !
 ! A11   A(2,4,7)              112.6845         estimate D2E/DX2                !
 ! A12   A(2,4,41)             107.9948         estimate D2E/DX2                !
 ! A13   A(2,4,42)             110.4291         estimate D2E/DX2                !
 ! A14   A(7,4,41)             106.041          estimate D2E/DX2                !
 ! A15   A(7,4,42)             111.8227         estimate D2E/DX2                !
 ! A16   A(41,4,42)            107.569          estimate D2E/DX2                !
 ! A17   A(2,5,8)              114.4303         estimate D2E/DX2                !
 ! A18   A(2,5,43)             109.3127         estimate D2E/DX2                !
 ! A19   A(2,5,44)             107.1329         estimate D2E/DX2                !
 ! A20   A(8,5,43)             107.865          estimate D2E/DX2                !
 ! A21   A(8,5,44)             109.6115         estimate D2E/DX2                !
 ! A22   A(43,5,44)            108.3478         estimate D2E/DX2                !
 ! A23   A(4,7,10)             121.6779         estimate D2E/DX2                !
 ! A24   A(4,7,11)             118.6644         estimate D2E/DX2                !
 ! A25   A(10,7,11)            119.6332         estimate D2E/DX2                !
 ! A26   A(5,8,9)              123.7285         estimate D2E/DX2                !
 ! A27   A(5,8,30)             113.0207         estimate D2E/DX2                !
 ! A28   A(9,8,30)             123.2484         estimate D2E/DX2                !
 ! A29   A(7,11,21)            122.3409         estimate D2E/DX2                !
 ! A30   A(7,11,45)            115.7779         estimate D2E/DX2                !
 ! A31   A(21,11,45)           121.3883         estimate D2E/DX2                !
 ! A32   A(3,12,13)            131.429          estimate D2E/DX2                !
 ! A33   A(3,12,46)            115.1855         estimate D2E/DX2                !
 ! A34   A(13,12,46)           113.3748         estimate D2E/DX2                !
 ! A35   A(12,13,14)           119.4088         estimate D2E/DX2                !
 ! A36   A(13,14,15)           122.7643         estimate D2E/DX2                !
 ! A37   A(13,14,47)           121.6781         estimate D2E/DX2                !
 ! A38   A(15,14,47)           115.5575         estimate D2E/DX2                !
 ! A39   A(14,15,16)           116.5019         estimate D2E/DX2                !
 ! A40   A(14,15,20)           125.9943         estimate D2E/DX2                !
 ! A41   A(16,15,20)           117.5037         estimate D2E/DX2                !
 ! A42   A(15,16,17)           122.553          estimate D2E/DX2                !
 ! A43   A(15,16,66)           118.7235         estimate D2E/DX2                !
 ! A44   A(17,16,66)           118.7235         estimate D2E/DX2                !
 ! A45   A(16,17,18)           119.035          estimate D2E/DX2                !
 ! A46   A(16,17,48)           120.3277         estimate D2E/DX2                !
 ! A47   A(18,17,48)           120.6374         estimate D2E/DX2                !
 ! A48   A(17,18,19)           119.9454         estimate D2E/DX2                !
 ! A49   A(17,18,49)           120.5241         estimate D2E/DX2                !
 ! A50   A(19,18,49)           119.5306         estimate D2E/DX2                !
 ! A51   A(18,19,20)           121.0618         estimate D2E/DX2                !
 ! A52   A(18,19,50)           120.0159         estimate D2E/DX2                !
 ! A53   A(20,19,50)           118.9223         estimate D2E/DX2                !
 ! A54   A(15,20,19)           119.9012         estimate D2E/DX2                !
 ! A55   A(15,20,64)           120.0494         estimate D2E/DX2                !
 ! A56   A(19,20,64)           120.0494         estimate D2E/DX2                !
 ! A57   A(11,21,22)           116.6324         estimate D2E/DX2                !
 ! A58   A(21,22,23)           124.5268         estimate D2E/DX2                !
 ! A59   A(21,22,51)           120.5296         estimate D2E/DX2                !
 ! A60   A(23,22,51)           114.9425         estimate D2E/DX2                !
 ! A61   A(22,23,24)           124.7553         estimate D2E/DX2                !
 ! A62   A(22,23,28)           117.3805         estimate D2E/DX2                !
 ! A63   A(24,23,28)           117.8622         estimate D2E/DX2                !
 ! A64   A(23,24,25)           119.7749         estimate D2E/DX2                !
 ! A65   A(23,24,29)           118.8254         estimate D2E/DX2                !
 ! A66   A(25,24,29)           121.3997         estimate D2E/DX2                !
 ! A67   A(24,25,26)           120.9251         estimate D2E/DX2                !
 ! A68   A(24,25,52)           118.9796         estimate D2E/DX2                !
 ! A69   A(26,25,52)           120.0954         estimate D2E/DX2                !
 ! A70   A(25,26,27)           120.1188         estimate D2E/DX2                !
 ! A71   A(25,26,53)           119.4727         estimate D2E/DX2                !
 ! A72   A(27,26,53)           120.4084         estimate D2E/DX2                !
 ! A73   A(26,27,28)           119.0684         estimate D2E/DX2                !
 ! A74   A(26,27,54)           120.6269         estimate D2E/DX2                !
 ! A75   A(28,27,54)           120.3045         estimate D2E/DX2                !
 ! A76   A(23,28,27)           122.2506         estimate D2E/DX2                !
 ! A77   A(23,28,55)           118.1612         estimate D2E/DX2                !
 ! A78   A(27,28,55)           119.5878         estimate D2E/DX2                !
 ! A79   A(24,29,56)           109.0427         estimate D2E/DX2                !
 ! A80   A(8,30,31)            119.3541         estimate D2E/DX2                !
 ! A81   A(8,30,57)            118.8943         estimate D2E/DX2                !
 ! A82   A(31,30,57)           119.6072         estimate D2E/DX2                !
 ! A83   A(30,31,32)           119.2309         estimate D2E/DX2                !
 ! A84   A(31,32,33)           120.92           estimate D2E/DX2                !
 ! A85   A(31,32,58)           121.4502         estimate D2E/DX2                !
 ! A86   A(33,32,58)           117.6292         estimate D2E/DX2                !
 ! A87   A(32,33,34)           119.6222         estimate D2E/DX2                !
 ! A88   A(32,33,38)           121.4886         estimate D2E/DX2                !
 ! A89   A(34,33,38)           118.8877         estimate D2E/DX2                !
 ! A90   A(33,34,35)           121.48           estimate D2E/DX2                !
 ! A91   A(33,34,59)           118.4637         estimate D2E/DX2                !
 ! A92   A(35,34,59)           120.0563         estimate D2E/DX2                !
 ! A93   A(34,35,36)           119.0839         estimate D2E/DX2                !
 ! A94   A(34,35,60)           120.3904         estimate D2E/DX2                !
 ! A95   A(36,35,60)           120.5257         estimate D2E/DX2                !
 ! A96   A(35,36,37)           120.7934         estimate D2E/DX2                !
 ! A97   A(35,36,61)           119.8735         estimate D2E/DX2                !
 ! A98   A(37,36,61)           119.333          estimate D2E/DX2                !
 ! A99   A(36,37,38)           120.556          estimate D2E/DX2                !
 ! A100  A(36,37,62)           121.5244         estimate D2E/DX2                !
 ! A101  A(38,37,62)           117.9196         estimate D2E/DX2                !
 ! A102  A(33,38,37)           119.1988         estimate D2E/DX2                !
 ! A103  A(33,38,39)           122.7897         estimate D2E/DX2                !
 ! A104  A(37,38,39)           118.0113         estimate D2E/DX2                !
 ! A105  A(38,39,63)           108.8071         estimate D2E/DX2                !
 ! A106  A(20,64,65)           109.5            estimate D2E/DX2                !
 ! D1    D(40,1,2,3)          -142.1864         estimate D2E/DX2                !
 ! D2    D(40,1,2,4)           -24.8921         estimate D2E/DX2                !
 ! D3    D(40,1,2,5)           101.0368         estimate D2E/DX2                !
 ! D4    D(1,2,3,6)           -174.6904         estimate D2E/DX2                !
 ! D5    D(1,2,3,12)             5.9671         estimate D2E/DX2                !
 ! D6    D(4,2,3,6)             64.7868         estimate D2E/DX2                !
 ! D7    D(4,2,3,12)          -114.5557         estimate D2E/DX2                !
 ! D8    D(5,2,3,6)            -55.7049         estimate D2E/DX2                !
 ! D9    D(5,2,3,12)           124.9526         estimate D2E/DX2                !
 ! D10   D(1,2,4,7)             49.2225         estimate D2E/DX2                !
 ! D11   D(1,2,4,41)           -67.564          estimate D2E/DX2                !
 ! D12   D(1,2,4,42)           175.0704         estimate D2E/DX2                !
 ! D13   D(3,2,4,7)            168.6398         estimate D2E/DX2                !
 ! D14   D(3,2,4,41)            51.8533         estimate D2E/DX2                !
 ! D15   D(3,2,4,42)           -65.5123         estimate D2E/DX2                !
 ! D16   D(5,2,4,7)            -75.1101         estimate D2E/DX2                !
 ! D17   D(5,2,4,41)           168.1034         estimate D2E/DX2                !
 ! D18   D(5,2,4,42)            50.7378         estimate D2E/DX2                !
 ! D19   D(1,2,5,8)            -62.3194         estimate D2E/DX2                !
 ! D20   D(1,2,5,43)           176.6011         estimate D2E/DX2                !
 ! D21   D(1,2,5,44)            59.4026         estimate D2E/DX2                !
 ! D22   D(3,2,5,8)            178.8781         estimate D2E/DX2                !
 ! D23   D(3,2,5,43)            57.7987         estimate D2E/DX2                !
 ! D24   D(3,2,5,44)           -59.3998         estimate D2E/DX2                !
 ! D25   D(4,2,5,8)             62.7874         estimate D2E/DX2                !
 ! D26   D(4,2,5,43)           -58.292          estimate D2E/DX2                !
 ! D27   D(4,2,5,44)          -175.4905         estimate D2E/DX2                !
 ! D28   D(2,3,12,13)         -179.6968         estimate D2E/DX2                !
 ! D29   D(2,3,12,46)           -0.9838         estimate D2E/DX2                !
 ! D30   D(6,3,12,13)            1.0069         estimate D2E/DX2                !
 ! D31   D(6,3,12,46)          179.7199         estimate D2E/DX2                !
 ! D32   D(2,4,7,10)           -43.1222         estimate D2E/DX2                !
 ! D33   D(2,4,7,11)           138.6843         estimate D2E/DX2                !
 ! D34   D(41,4,7,10)           74.8199         estimate D2E/DX2                !
 ! D35   D(41,4,7,11)         -103.3736         estimate D2E/DX2                !
 ! D36   D(42,4,7,10)         -168.2143         estimate D2E/DX2                !
 ! D37   D(42,4,7,11)           13.5922         estimate D2E/DX2                !
 ! D38   D(2,5,8,9)           -105.4767         estimate D2E/DX2                !
 ! D39   D(2,5,8,30)            75.0716         estimate D2E/DX2                !
 ! D40   D(43,5,8,9)            16.3981         estimate D2E/DX2                !
 ! D41   D(43,5,8,30)         -163.0537         estimate D2E/DX2                !
 ! D42   D(44,5,8,9)           134.1694         estimate D2E/DX2                !
 ! D43   D(44,5,8,30)          -45.2824         estimate D2E/DX2                !
 ! D44   D(4,7,11,21)           -4.0386         estimate D2E/DX2                !
 ! D45   D(4,7,11,45)         -176.0822         estimate D2E/DX2                !
 ! D46   D(10,7,11,21)         177.7301         estimate D2E/DX2                !
 ! D47   D(10,7,11,45)           5.6865         estimate D2E/DX2                !
 ! D48   D(5,8,30,31)         -174.7482         estimate D2E/DX2                !
 ! D49   D(5,8,30,57)          -11.4484         estimate D2E/DX2                !
 ! D50   D(9,8,30,31)            5.797          estimate D2E/DX2                !
 ! D51   D(9,8,30,57)          169.0968         estimate D2E/DX2                !
 ! D52   D(7,11,21,22)        -173.7594         estimate D2E/DX2                !
 ! D53   D(45,11,21,22)         -2.1554         estimate D2E/DX2                !
 ! D54   D(3,12,13,14)         180.0            estimate D2E/DX2                !
 ! D55   D(46,12,13,14)          1.2688         estimate D2E/DX2                !
 ! D56   D(12,13,14,15)        179.8059         estimate D2E/DX2                !
 ! D57   D(12,13,14,47)         -0.0838         estimate D2E/DX2                !
 ! D58   D(13,14,15,16)       -179.8933         estimate D2E/DX2                !
 ! D59   D(13,14,15,20)          0.0216         estimate D2E/DX2                !
 ! D60   D(47,14,15,16)          0.0026         estimate D2E/DX2                !
 ! D61   D(47,14,15,20)        179.9175         estimate D2E/DX2                !
 ! D62   D(14,15,16,17)        179.9141         estimate D2E/DX2                !
 ! D63   D(14,15,16,66)         -0.0859         estimate D2E/DX2                !
 ! D64   D(20,15,16,17)         -0.0083         estimate D2E/DX2                !
 ! D65   D(20,15,16,66)        179.9917         estimate D2E/DX2                !
 ! D66   D(14,15,20,19)       -179.9004         estimate D2E/DX2                !
 ! D67   D(14,15,20,64)          0.0996         estimate D2E/DX2                !
 ! D68   D(16,15,20,19)          0.0138         estimate D2E/DX2                !
 ! D69   D(16,15,20,64)       -179.9862         estimate D2E/DX2                !
 ! D70   D(15,16,17,18)         -0.0038         estimate D2E/DX2                !
 ! D71   D(15,16,17,48)       -179.9737         estimate D2E/DX2                !
 ! D72   D(66,16,17,18)        179.9962         estimate D2E/DX2                !
 ! D73   D(66,16,17,48)          0.0263         estimate D2E/DX2                !
 ! D74   D(16,17,18,19)          0.0104         estimate D2E/DX2                !
 ! D75   D(16,17,18,49)       -179.9797         estimate D2E/DX2                !
 ! D76   D(48,17,18,19)        179.9803         estimate D2E/DX2                !
 ! D77   D(48,17,18,49)         -0.0098         estimate D2E/DX2                !
 ! D78   D(17,18,19,20)         -0.0049         estimate D2E/DX2                !
 ! D79   D(17,18,19,50)       -179.9942         estimate D2E/DX2                !
 ! D80   D(49,18,19,20)        179.9853         estimate D2E/DX2                !
 ! D81   D(49,18,19,50)         -0.004          estimate D2E/DX2                !
 ! D82   D(18,19,20,15)         -0.0075         estimate D2E/DX2                !
 ! D83   D(18,19,20,64)        179.9925         estimate D2E/DX2                !
 ! D84   D(50,19,20,15)        179.9819         estimate D2E/DX2                !
 ! D85   D(50,19,20,64)         -0.0181         estimate D2E/DX2                !
 ! D86   D(15,20,64,65)        177.8034         estimate D2E/DX2                !
 ! D87   D(19,20,64,65)         -2.1966         estimate D2E/DX2                !
 ! D88   D(11,21,22,23)        179.8054         estimate D2E/DX2                !
 ! D89   D(11,21,22,51)          0.1972         estimate D2E/DX2                !
 ! D90   D(21,22,23,24)         -1.1518         estimate D2E/DX2                !
 ! D91   D(21,22,23,28)        179.3754         estimate D2E/DX2                !
 ! D92   D(51,22,23,24)        178.4759         estimate D2E/DX2                !
 ! D93   D(51,22,23,28)         -0.9968         estimate D2E/DX2                !
 ! D94   D(22,23,24,25)       -179.4188         estimate D2E/DX2                !
 ! D95   D(22,23,24,29)          0.5986         estimate D2E/DX2                !
 ! D96   D(28,23,24,25)          0.0516         estimate D2E/DX2                !
 ! D97   D(28,23,24,29)       -179.931          estimate D2E/DX2                !
 ! D98   D(22,23,28,27)        179.5176         estimate D2E/DX2                !
 ! D99   D(22,23,28,55)         -0.2592         estimate D2E/DX2                !
 ! D100  D(24,23,28,27)          0.0076         estimate D2E/DX2                !
 ! D101  D(24,23,28,55)       -179.7692         estimate D2E/DX2                !
 ! D102  D(23,24,25,26)         -0.0618         estimate D2E/DX2                !
 ! D103  D(23,24,25,52)        179.9118         estimate D2E/DX2                !
 ! D104  D(29,24,25,26)        179.9203         estimate D2E/DX2                !
 ! D105  D(29,24,25,52)         -0.1061         estimate D2E/DX2                !
 ! D106  D(23,24,29,56)       -177.8632         estimate D2E/DX2                !
 ! D107  D(25,24,29,56)          2.1545         estimate D2E/DX2                !
 ! D108  D(24,25,26,27)          0.0116         estimate D2E/DX2                !
 ! D109  D(24,25,26,53)        179.9635         estimate D2E/DX2                !
 ! D110  D(52,25,26,27)       -179.9617         estimate D2E/DX2                !
 ! D111  D(52,25,26,53)         -0.0098         estimate D2E/DX2                !
 ! D112  D(25,26,27,28)          0.0473         estimate D2E/DX2                !
 ! D113  D(25,26,27,54)        179.9064         estimate D2E/DX2                !
 ! D114  D(53,26,27,28)       -179.9042         estimate D2E/DX2                !
 ! D115  D(53,26,27,54)         -0.0451         estimate D2E/DX2                !
 ! D116  D(26,27,28,23)         -0.0572         estimate D2E/DX2                !
 ! D117  D(26,27,28,55)        179.7165         estimate D2E/DX2                !
 ! D118  D(54,27,28,23)       -179.9167         estimate D2E/DX2                !
 ! D119  D(54,27,28,55)         -0.143          estimate D2E/DX2                !
 ! D120  D(8,30,31,32)         180.0            estimate D2E/DX2                !
 ! D121  D(57,30,31,32)         16.8205         estimate D2E/DX2                !
 ! D122  D(30,31,32,33)       -179.9499         estimate D2E/DX2                !
 ! D123  D(30,31,32,58)         -0.2306         estimate D2E/DX2                !
 ! D124  D(31,32,33,34)       -179.2381         estimate D2E/DX2                !
 ! D125  D(31,32,33,38)          1.197          estimate D2E/DX2                !
 ! D126  D(58,32,33,34)          1.0322         estimate D2E/DX2                !
 ! D127  D(58,32,33,38)       -178.5327         estimate D2E/DX2                !
 ! D128  D(32,33,34,35)       -179.6878         estimate D2E/DX2                !
 ! D129  D(32,33,34,59)          0.3002         estimate D2E/DX2                !
 ! D130  D(38,33,34,35)         -0.1117         estimate D2E/DX2                !
 ! D131  D(38,33,34,59)        179.8763         estimate D2E/DX2                !
 ! D132  D(32,33,38,37)        179.6482         estimate D2E/DX2                !
 ! D133  D(32,33,38,39)         -0.1943         estimate D2E/DX2                !
 ! D134  D(34,33,38,37)          0.0802         estimate D2E/DX2                !
 ! D135  D(34,33,38,39)       -179.7622         estimate D2E/DX2                !
 ! D136  D(33,34,35,36)          0.0536         estimate D2E/DX2                !
 ! D137  D(33,34,35,60)       -179.9564         estimate D2E/DX2                !
 ! D138  D(59,34,35,36)       -179.9342         estimate D2E/DX2                !
 ! D139  D(59,34,35,60)          0.0558         estimate D2E/DX2                !
 ! D140  D(34,35,36,37)          0.0367         estimate D2E/DX2                !
 ! D141  D(34,35,36,61)       -179.9728         estimate D2E/DX2                !
 ! D142  D(60,35,36,37)       -179.9533         estimate D2E/DX2                !
 ! D143  D(60,35,36,61)          0.0371         estimate D2E/DX2                !
 ! D144  D(35,36,37,38)         -0.0666         estimate D2E/DX2                !
 ! D145  D(35,36,37,62)        179.9822         estimate D2E/DX2                !
 ! D146  D(61,36,37,38)        179.9429         estimate D2E/DX2                !
 ! D147  D(61,36,37,62)         -0.0082         estimate D2E/DX2                !
 ! D148  D(36,37,38,33)          0.0069         estimate D2E/DX2                !
 ! D149  D(36,37,38,39)        179.8569         estimate D2E/DX2                !
 ! D150  D(62,37,38,33)        179.9597         estimate D2E/DX2                !
 ! D151  D(62,37,38,39)         -0.1903         estimate D2E/DX2                !
 ! D152  D(33,38,39,63)         -0.4591         estimate D2E/DX2                !
 ! D153  D(37,38,39,63)        179.6967         estimate D2E/DX2                !
 --------------------------------------------------------------------------------
 Trust Radius=3.00D-01 FncErr=1.00D-07 GrdErr=1.00D-06
 Number of steps in this run=    339 maximum allowed number of steps=    396.
 GradGradGradGradGradGradGradGradGradGradGradGradGradGradGradGradGradGrad

 Leave Link  103 at Thu Oct 13 22:32:56 2016, MaxMem= 1342177280 cpu:       0.5
 (Enter /opt/software/g09/l202.exe)
 Stoichiometry    C27H26N6O7
 Framework group  C1[X(C27H26N6O7)]
 Deg. of freedom   192
 Full point group                 C1      NOp   1
 Largest Abelian subgroup         C1      NOp   1
 Largest concise Abelian subgroup C1      NOp   1
                         Standard orientation:                         
 ---------------------------------------------------------------------
 Center     Atomic      Atomic             Coordinates (Angstroms)
 Number     Number       Type             X           Y           Z
 ---------------------------------------------------------------------
      1          8           0       -1.050619   -1.302738    0.459781
      2          6           0       -0.909410   -0.037753   -0.188596
      3          6           0       -2.310358    0.521888   -0.555955
      4          6           0       -0.256711    1.012473    0.752486
      5          6           0       -0.139591   -0.209771   -1.527069
      6          8           0       -2.414755    1.557385   -1.209425
      7          6           0        1.001685    0.495725    1.421844
      8          6           0        1.284142   -0.730123   -1.372799
      9          8           0        2.277065   -0.034278   -1.502168
     10          8           0        1.064091   -0.648443    1.896500
     11          7           0        2.071777    1.328882    1.531573
     12          7           0       -3.335763   -0.234369   -0.073356
     13          7           0       -4.699902   -0.091579   -0.178349
     14          6           0       -5.473053   -0.961214    0.380217
     15          6           0       -6.933838   -0.878502    0.318403
     16          6           0       -7.649180   -1.897057    0.976492
     17          6           0       -9.039081   -1.940630    0.999248
     18          6           0       -9.758975   -0.938880    0.346460
     19          6           0       -9.083549    0.084306   -0.314961
     20          6           0       -7.684215    0.128974   -0.338534
     21          7           0        2.080024    2.578974    0.991807
     22          6           0        3.188609    3.225318    1.052886
     23          6           0        3.391300    4.570956    0.526939
     24          6           0        2.401573    5.335155   -0.141065
     25          6           0        2.713819    6.614469   -0.615213
     26          6           0        3.986702    7.152050   -0.439519
     27          6           0        4.974199    6.414729    0.216876
     28          6           0        4.666978    5.143384    0.687658
     29          8           0        1.164405    4.802745   -0.305516
     30          7           0        1.337744   -2.083540   -1.080976
     31          7           0        2.538733   -2.659790   -0.810441
     32          6           0        2.585865   -3.919431   -0.539180
     33          6           0        3.849142   -4.572476   -0.243610
     34          6           0        3.870992   -5.952728    0.033143
     35          6           0        5.055039   -6.614328    0.326628
     36          6           0        6.254119   -5.888249    0.348120
     37          6           0        6.264926   -4.524428    0.081045
     38          6           0        5.073107   -3.846465   -0.217375
     39          8           0        5.142261   -2.527471   -0.464502
     40          1           0       -0.359999   -1.323219    1.165117
     41          1           0       -0.964825    1.227951    1.563070
     42          1           0       -0.077241    1.943070    0.216903
     43          1           0       -0.090885    0.750277   -2.040864
     44          1           0       -0.719732   -0.903487   -2.146367
     45          1           0        2.915539    0.917385    1.932857
     46          1           0       -3.056996   -1.059612    0.441185
     47          1           0       -5.073935   -1.808789    0.933264
     48          1           0       -9.553730   -2.742756    1.518208
     49          1           0      -10.845027   -0.949055    0.349148
     50          1           0       -9.643935    0.866327   -0.824444
     51          1           0        4.074459    2.771555    1.518908
     52          1           0        1.944683    7.189187   -1.127380
     53          1           0        4.203417    8.146759   -0.817436
     54          1           0        5.968810    6.824805    0.356911
     55          1           0        5.430718    4.560118    1.195821
     56          1           0        0.616999    5.424719   -0.803821
     57          1           0        0.478224   -2.565849   -0.822140
     58          1           0        1.677587   -4.535053   -0.518361
     59          1           0        2.931412   -6.500392    0.013211
     60          1           0        5.051524   -7.678969    0.536574
     61          1           0        7.188659   -6.393423    0.575942
     62          1           0        7.185923   -3.950922    0.094733
     63          1           0        4.233005   -2.191939   -0.661894
     64          8           0       -7.013079    1.189285   -1.024259
     65          1           0       -7.661057    1.762565   -1.440281
     66          1           0       -7.102259   -2.667539    1.478621
 ---------------------------------------------------------------------
 Rotational constants (GHZ):      0.0750643      0.0421221      0.0281916
 Leave Link  202 at Thu Oct 13 22:32:56 2016, MaxMem= 1342177280 cpu:       0.7
 (Enter /opt/software/g09/l301.exe)
 General basis read from cards:  (5D, 7F)
 Centers:   2  3  4  5  7  8 14 15 16 17 18 19 20 22 23 24 25 26 27 28
 Centers:  32 33 34 35 36 37 38 40 41 42 43 44 45 46 47 48 49 50 51 52
 Centers:  53 54 55 56 57 58 59 60 61 62 63 65 66 11 12 13 21 30 31  1
 Centers:   6  9 10 29 39 64
 6-31G**
 ****
 Ernie: Thresh=  0.10000D-02 Tol=  0.10000D-05 Strict=F.
 ======================================================================================================
                                       Pseudopotential Parameters
 ======================================================================================================
  Center     Atomic      Valence      Angular      Power
  Number     Number     Electrons     Momentum     of R      Exponent        Coefficient   SO-Coeffient
 ======================================================================================================
    1          8
                                   No pseudopotential on this center.
    2          6
                                   No pseudopotential on this center.
    3          6
                                   No pseudopotential on this center.
    4          6
                                   No pseudopotential on this center.
    5          6
                                   No pseudopotential on this center.
    6          8
                                   No pseudopotential on this center.
    7          6
                                   No pseudopotential on this center.
    8          6
                                   No pseudopotential on this center.
    9          8
                                   No pseudopotential on this center.
   10          8
                                   No pseudopotential on this center.
   11          7
                                   No pseudopotential on this center.
   12          7
                                   No pseudopotential on this center.
   13          7
                                   No pseudopotential on this center.
   14          6
                                   No pseudopotential on this center.
   15          6
                                   No pseudopotential on this center.
   16          6
                                   No pseudopotential on this center.
   17          6
                                   No pseudopotential on this center.
   18          6
                                   No pseudopotential on this center.
   19          6
                                   No pseudopotential on this center.
   20          6
                                   No pseudopotential on this center.
   21          7
                                   No pseudopotential on this center.
   22          6
                                   No pseudopotential on this center.
   23          6
                                   No pseudopotential on this center.
   24          6
                                   No pseudopotential on this center.
   25          6
                                   No pseudopotential on this center.
   26          6
                                   No pseudopotential on this center.
   27          6
                                   No pseudopotential on this center.
   28          6
                                   No pseudopotential on this center.
   29          8
                                   No pseudopotential on this center.
   30          7
                                   No pseudopotential on this center.
   31          7
                                   No pseudopotential on this center.
   32          6
                                   No pseudopotential on this center.
   33          6
                                   No pseudopotential on this center.
   34          6
                                   No pseudopotential on this center.
   35          6
                                   No pseudopotential on this center.
   36          6
                                   No pseudopotential on this center.
   37          6
                                   No pseudopotential on this center.
   38          6
                                   No pseudopotential on this center.
   39          8
                                   No pseudopotential on this center.
   40          1
                                   No pseudopotential on this center.
   41          1
                                   No pseudopotential on this center.
   42          1
                                   No pseudopotential on this center.
   43          1
                                   No pseudopotential on this center.
   44          1
                                   No pseudopotential on this center.
   45          1
                                   No pseudopotential on this center.
   46          1
                                   No pseudopotential on this center.
   47          1
                                   No pseudopotential on this center.
   48          1
                                   No pseudopotential on this center.
   49          1
                                   No pseudopotential on this center.
   50          1
                                   No pseudopotential on this center.
   51          1
                                   No pseudopotential on this center.
   52          1
                                   No pseudopotential on this center.
   53          1
                                   No pseudopotential on this center.
   54          1
                                   No pseudopotential on this center.
   55          1
                                   No pseudopotential on this center.
   56          1
                                   No pseudopotential on this center.
   57          1
                                   No pseudopotential on this center.
   58          1
                                   No pseudopotential on this center.
   59          1
                                   No pseudopotential on this center.
   60          1
                                   No pseudopotential on this center.
   61          1
                                   No pseudopotential on this center.
   62          1
                                   No pseudopotential on this center.
   63          1
                                   No pseudopotential on this center.
   64          8
                                   No pseudopotential on this center.
   65          1
                                   No pseudopotential on this center.
   66          1
                                   No pseudopotential on this center.
 ======================================================================================================
 There are   690 symmetry adapted basis functions of A   symmetry.
 Integral buffers will be    131072 words long.
 Raffenetti 2 integral format.
 Two-electron integral symmetry is turned on.
   690 basis functions,  1302 primitive gaussians,   730 cartesian basis functions
   143 alpha electrons      143 beta electrons
       nuclear repulsion energy      4166.7094589473 Hartrees.
 IExCor=  402 DFT=T Ex+Corr=B3LYP ExCW=0 ScaHFX=  0.200000
 ScaDFX=  0.800000  0.720000  1.000000  0.810000 ScalE2=  1.000000  1.000000
 IRadAn=      0 IRanWt=     -1 IRanGd=            0 ICorTp=0
 NAtoms=   66 NActive=   66 NUniq=   66 SFac= 1.00D+00 NAtFMM=   50 NAOKFM=T Big=T
 ------------------------------------------------------------------------------
 Polarizable Continuum Model (PCM)
 =================================
 Model                : PCM.
 Atomic radii         : UFF (Universal Force Field).
 Polarization charges : Total charges.
 Charge compensation  : None.
 Solution method      : Matrix inversion.
 Cavity type          : Scaled VdW (van der Waals Surface) (Alpha=1.100).
 Cavity algorithm     : GePol (No added spheres)
                        Default sphere list used, NSphG=   66.
                        Lebedev-Laikov grids with approx.  5.0 points / Ang**2.
                        Smoothing algorithm: Karplus/York (Gamma=1.0000).
                        Polarization charges: spherical gaussians, with
                                              point-specific exponents (IZeta= 3).
                        Self-potential: point-specific (ISelfS= 7).
                        Self-field    : sphere-specific E.n sum rule (ISelfD= 2).
 1st derivatives      : Analytical E(r).r(x)/FMM algorithm (CHGder, D1EAlg=3).
                        Cavity 1st derivative terms included.
 Solvent              : Water, Eps=  78.355300 Eps(inf)=   1.777849
 ------------------------------------------------------------------------------
 GePol: Number of generator spheres                  =      66
 GePol: Total number of spheres                      =      66
 GePol: Number of exposed spheres                    =      66 (100.00%)
 GePol: Number of points                             =    4955
 GePol: Average weight of points                     =       0.13
 GePol: Minimum weight of points                     =   0.40D-10
 GePol: Maximum weight of points                     =    0.20577
 GePol: Number of points with low weight             =     283
 GePol: Fraction of low-weight points (<1% of avg)   =       5.71%
 GePol: Cavity surface area                          =    641.996 Ang**2
 GePol: Cavity volume                                =    713.162 Ang**3
 Leave Link  301 at Thu Oct 13 22:32:56 2016, MaxMem= 1342177280 cpu:       2.8
 (Enter /opt/software/g09/linda-exe/l302.exel)
 NPDir=0 NMtPBC=     1 NCelOv=     1 NCel=       1 NClECP=     1 NCelD=      1
         NCelK=      1 NCelE2=     1 NClLst=     1 CellRange=     0.0.
 One-electron integrals computed using PRISM.
   1 Symmetry operations used in ECPInt.
 ECPInt:  NShTT=   28441 NPrTT=  163533 LenC2=   15576 LenP2D=   47850.
 LDataN:  DoStor=T MaxTD1= 4 Len=   56
 NBasis=   690 RedAO= T  NBF=   690
 NBsUse=   690 1.00D-06 NBFU=   690
 Precomputing XC quadrature grid using
 IXCGrd= 2 IRadAn=           0 IRanWt=          -1 IRanGd=           0 AccXCQ= 0.00D+00.
 NRdTot=    4290 NPtTot=      549392 NUsed=      580293 NTot=      580325
 NSgBfM=   582   584   591   591   598 NAtAll=    66    66.
 Leave Link  302 at Thu Oct 13 22:33:02 2016, MaxMem= 1342177280 cpu:      94.1
 (Enter /opt/software/g09/l303.exe)
 DipDrv:  MaxL=1.
 Leave Link  303 at Thu Oct 13 22:33:02 2016, MaxMem= 1342177280 cpu:       5.6
 (Enter /opt/software/g09/linda-exe/l401.exel)
 Harris functional with IExCor=  402 diagonalized for initial guess.
 ExpMin= 1.61D-01 ExpMax= 5.48D+03 ExpMxC= 8.25D+02 IAcc=1 IRadAn=         1 AccDes= 0.00D+00
 HarFok:  IExCor=  402 AccDes= 0.00D+00 IRadAn=         1 IDoV= 1
 ScaDFX=  1.000000  1.000000  1.000000  1.000000
 FoFCou: FMM=F IPFlag=           0 FMFlag=      100000 FMFlg1=        2001
         NFxFlg=           0 DoJE=T BraDBF=F KetDBF=T FulRan=T
         Omega=  0.000000  0.000000  1.000000  0.000000  0.000000 ICntrl=     500 IOpCl=  0
         NMat0=    1 NMatS0=    1 NMatT0=    0 NMatD0=    1 NMtDS0=    0 NMtDT0=    0
         I1Cent=           4 NGrid=           0.
 Petite list used in FoFCou.
 Harris En= -1899.41833273901    
 Initial guess orbital symmetries:
 Alpha Orbitals:
       Occupied  (A) (A) (A) (A) (A) (A) (A) (A) (A) (A) (A) (A)
                 (A) (A) (A) (A) (A) (A) (A) (A) (A) (A) (A) (A)
                 (A) (A) (A) (A) (A) (A) (A) (A) (A) (A) (A) (A)
                 (A) (A) (A) (A) (A) (A) (A) (A) (A) (A) (A) (A)
                 (A) (A) (A) (A) (A) (A) (A) (A) (A) (A) (A) (A)
                 (A) (A) (A) (A) (A) (A) (A) (A) (A) (A) (A) (A)
                 (A) (A) (A) (A) (A) (A) (A) (A) (A) (A) (A) (A)
                 (A) (A) (A) (A) (A) (A) (A) (A) (A) (A) (A) (A)
                 (A) (A) (A) (A) (A) (A) (A) (A) (A) (A) (A) (A)
                 (A) (A) (A) (A) (A) (A) (A) (A) (A) (A) (A) (A)
                 (A) (A) (A) (A) (A) (A) (A) (A) (A) (A) (A) (A)
                 (A) (A) (A) (A) (A) (A) (A) (A) (A) (A) (A)
       Virtual   (A) (A) (A) (A) (A) (A) (A) (A) (A) (A) (A) (A)
                 (A) (A) (A) (A) (A) (A) (A) (A) (A) (A) (A) (A)
                 (A) (A) (A) (A) (A) (A) (A) (A) (A) (A) (A) (A)
                 (A) (A) (A) (A) (A) (A) (A) (A) (A) (A) (A) (A)
                 (A) (A) (A) (A) (A) (A) (A) (A) (A) (A) (A) (A)
                 (A) (A) (A) (A) (A) (A) (A) (A) (A) (A) (A) (A)
                 (A) (A) (A) (A) (A) (A) (A) (A) (A) (A) (A) (A)
                 (A) (A) (A) (A) (A) (A) (A) (A) (A) (A) (A) (A)
                 (A) (A) (A) (A) (A) (A) (A) (A) (A) (A) (A) (A)
                 (A) (A) (A) (A) (A) (A) (A) (A) (A) (A) (A) (A)
                 (A) (A) (A) (A) (A) (A) (A) (A) (A) (A) (A) (A)
                 (A) (A) (A) (A) (A) (A) (A) (A) (A) (A) (A) (A)
                 (A) (A) (A) (A) (A) (A) (A) (A) (A) (A) (A) (A)
                 (A) (A) (A) (A) (A) (A) (A) (A) (A) (A) (A) (A)
                 (A) (A) (A) (A) (A) (A) (A) (A) (A) (A) (A) (A)
                 (A) (A) (A) (A) (A) (A) (A) (A) (A) (A) (A) (A)
                 (A) (A) (A) (A) (A) (A) (A) (A) (A) (A) (A) (A)
                 (A) (A) (A) (A) (A) (A) (A) (A) (A) (A) (A) (A)
                 (A) (A) (A) (A) (A) (A) (A) (A) (A) (A) (A) (A)
                 (A) (A) (A) (A) (A) (A) (A) (A) (A) (A) (A) (A)
                 (A) (A) (A) (A) (A) (A) (A) (A) (A) (A) (A) (A)
                 (A) (A) (A) (A) (A) (A) (A) (A) (A) (A) (A) (A)
                 (A) (A) (A) (A) (A) (A) (A) (A) (A) (A) (A) (A)
                 (A) (A) (A) (A) (A) (A) (A) (A) (A) (A) (A) (A)
                 (A) (A) (A) (A) (A) (A) (A) (A) (A) (A) (A) (A)
                 (A) (A) (A) (A) (A) (A) (A) (A) (A) (A) (A) (A)
                 (A) (A) (A) (A) (A) (A) (A) (A) (A) (A) (A) (A)
                 (A) (A) (A) (A) (A) (A) (A) (A) (A) (A) (A) (A)
                 (A) (A) (A) (A) (A) (A) (A) (A) (A) (A) (A) (A)
                 (A) (A) (A) (A) (A) (A) (A) (A) (A) (A) (A) (A)
                 (A) (A) (A) (A) (A) (A) (A) (A) (A) (A) (A) (A)
                 (A) (A) (A) (A) (A) (A) (A) (A) (A) (A) (A) (A)
                 (A) (A) (A) (A) (A) (A) (A) (A) (A) (A) (A) (A)
                 (A) (A) (A) (A) (A) (A) (A) (A) (A) (A) (A) (A)
                 (A) (A) (A) (A) (A) (A) (A) (A) (A) (A) (A) (A)
                 (A) (A) (A) (A) (A) (A) (A) (A) (A) (A) (A) (A)
                 (A) (A) (A) (A) (A) (A) (A) (A) (A) (A) (A) (A)
                 (A) (A) (A) (A) (A) (A) (A) (A) (A) (A) (A) (A)
                 (A) (A) (A) (A) (A) (A) (A) (A) (A) (A) (A) (A)
                 (A) (A) (A) (A) (A) (A) (A) (A) (A) (A) (A) (A)
                 (A) (A) (A) (A) (A) (A) (A) (A) (A) (A) (A) (A)
                 (A) (A) (A) (A) (A) (A) (A) (A) (A) (A) (A) (A)
                 (A) (A) (A) (A) (A) (A) (A) (A) (A) (A) (A) (A)
                 (A) (A) (A) (A) (A) (A) (A) (A) (A) (A) (A) (A)
                 (A) (A) (A) (A) (A) (A) (A) (A) (A) (A) (A) (A)
                 (A) (A) (A) (A) (A) (A) (A)
 Beta  Orbitals:
       Occupied  (A) (A) (A) (A) (A) (A) (A) (A) (A) (A) (A) (A)
                 (A) (A) (A) (A) (A) (A) (A) (A) (A) (A) (A) (A)
                 (A) (A) (A) (A) (A) (A) (A) (A) (A) (A) (A) (A)
                 (A) (A) (A) (A) (A) (A) (A) (A) (A) (A) (A) (A)
                 (A) (A) (A) (A) (A) (A) (A) (A) (A) (A) (A) (A)
                 (A) (A) (A) (A) (A) (A) (A) (A) (A) (A) (A) (A)
                 (A) (A) (A) (A) (A) (A) (A) (A) (A) (A) (A) (A)
                 (A) (A) (A) (A) (A) (A) (A) (A) (A) (A) (A) (A)
                 (A) (A) (A) (A) (A) (A) (A) (A) (A) (A) (A) (A)
                 (A) (A) (A) (A) (A) (A) (A) (A) (A) (A) (A) (A)
                 (A) (A) (A) (A) (A) (A) (A) (A) (A) (A) (A) (A)
                 (A) (A) (A) (A) (A) (A) (A) (A) (A) (A) (A)
       Virtual   (A) (A) (A) (A) (A) (A) (A) (A) (A) (A) (A) (A)
                 (A) (A) (A) (A) (A) (A) (A) (A) (A) (A) (A) (A)
                 (A) (A) (A) (A) (A) (A) (A) (A) (A) (A) (A) (A)
                 (A) (A) (A) (A) (A) (A) (A) (A) (A) (A) (A) (A)
                 (A) (A) (A) (A) (A) (A) (A) (A) (A) (A) (A) (A)
                 (A) (A) (A) (A) (A) (A) (A) (A) (A) (A) (A) (A)
                 (A) (A) (A) (A) (A) (A) (A) (A) (A) (A) (A) (A)
                 (A) (A) (A) (A) (A) (A) (A) (A) (A) (A) (A) (A)
                 (A) (A) (A) (A) (A) (A) (A) (A) (A) (A) (A) (A)
                 (A) (A) (A) (A) (A) (A) (A) (A) (A) (A) (A) (A)
                 (A) (A) (A) (A) (A) (A) (A) (A) (A) (A) (A) (A)
                 (A) (A) (A) (A) (A) (A) (A) (A) (A) (A) (A) (A)
                 (A) (A) (A) (A) (A) (A) (A) (A) (A) (A) (A) (A)
                 (A) (A) (A) (A) (A) (A) (A) (A) (A) (A) (A) (A)
                 (A) (A) (A) (A) (A) (A) (A) (A) (A) (A) (A) (A)
                 (A) (A) (A) (A) (A) (A) (A) (A) (A) (A) (A) (A)
                 (A) (A) (A) (A) (A) (A) (A) (A) (A) (A) (A) (A)
                 (A) (A) (A) (A) (A) (A) (A) (A) (A) (A) (A) (A)
                 (A) (A) (A) (A) (A) (A) (A) (A) (A) (A) (A) (A)
                 (A) (A) (A) (A) (A) (A) (A) (A) (A) (A) (A) (A)
                 (A) (A) (A) (A) (A) (A) (A) (A) (A) (A) (A) (A)
                 (A) (A) (A) (A) (A) (A) (A) (A) (A) (A) (A) (A)
                 (A) (A) (A) (A) (A) (A) (A) (A) (A) (A) (A) (A)
                 (A) (A) (A) (A) (A) (A) (A) (A) (A) (A) (A) (A)
                 (A) (A) (A) (A) (A) (A) (A) (A) (A) (A) (A) (A)
                 (A) (A) (A) (A) (A) (A) (A) (A) (A) (A) (A) (A)
                 (A) (A) (A) (A) (A) (A) (A) (A) (A) (A) (A) (A)
                 (A) (A) (A) (A) (A) (A) (A) (A) (A) (A) (A) (A)
                 (A) (A) (A) (A) (A) (A) (A) (A) (A) (A) (A) (A)
                 (A) (A) (A) (A) (A) (A) (A) (A) (A) (A) (A) (A)
                 (A) (A) (A) (A) (A) (A) (A) (A) (A) (A) (A) (A)
                 (A) (A) (A) (A) (A) (A) (A) (A) (A) (A) (A) (A)
                 (A) (A) (A) (A) (A) (A) (A) (A) (A) (A) (A) (A)
                 (A) (A) (A) (A) (A) (A) (A) (A) (A) (A) (A) (A)
                 (A) (A) (A) (A) (A) (A) (A) (A) (A) (A) (A) (A)
                 (A) (A) (A) (A) (A) (A) (A) (A) (A) (A) (A) (A)
                 (A) (A) (A) (A) (A) (A) (A) (A) (A) (A) (A) (A)
                 (A) (A) (A) (A) (A) (A) (A) (A) (A) (A) (A) (A)
                 (A) (A) (A) (A) (A) (A) (A) (A) (A) (A) (A) (A)
                 (A) (A) (A) (A) (A) (A) (A) (A) (A) (A) (A) (A)
                 (A) (A) (A) (A) (A) (A) (A) (A) (A) (A) (A) (A)
                 (A) (A) (A) (A) (A) (A) (A) (A) (A) (A) (A) (A)
                 (A) (A) (A) (A) (A) (A) (A) (A) (A) (A) (A) (A)
                 (A) (A) (A) (A) (A) (A) (A) (A) (A) (A) (A) (A)
                 (A) (A) (A) (A) (A) (A) (A) (A) (A) (A) (A) (A)
                 (A) (A) (A) (A) (A) (A) (A)
 The electronic state of the initial guess is 1-A.
 Initial guess <Sx>= 0.0000 <Sy>= 0.0000 <Sz>= 0.0000 <S**2>= 0.0000 S= 0.0000
 Leave Link  401 at Thu Oct 13 22:33:09 2016, MaxMem= 1342177280 cpu:     111.1
 (Enter /opt/software/g09/linda-exe/l502.exel)
 UHF open shell SCF:
 Requested convergence on RMS density matrix=1.00D-08 within 600 cycles.
 Requested convergence on MAX density matrix=1.00D-06.
 Requested convergence on             energy=1.00D-06.
 No special actions if energy rises.
 Using DIIS extrapolation, IDIIS=  1040.
 Integral symmetry usage will be decided dynamically.
       579686 words used for storage of precomputed grid.
 IEnd=     2562548 IEndB=     2562548 NGot=  1342177280 MDV=  1340509563
 LenX=  1340509563 LenY=  1339975933
 Fock matrices will be formed incrementally for  20 cycles.

 Cycle   1  Pass 1  IDiag  1:
 FoFCou: FMM=T IPFlag=           0 FMFlag=      100000 FMFlg1=        2001
         NFxFlg=           0 DoJE=F BraDBF=F KetDBF=F FulRan=T
         Omega=  0.000000  0.000000  1.000000  0.000000  0.000000 ICntrl=       0 IOpCl=  1
         NMat0=    1 NMatS0=    1 NMatT0=    0 NMatD0=    1 NMtDS0=    0 NMtDT0=    0
         I1Cent=           0 NGrid=           0.
 Symmetry not used in FoFCou.
 FMM levels:  10  Number of levels for PrismC:   9
 E= -1898.81414051297    
 DIIS: error= 2.37D-02 at cycle   1 NSaved=   1.
 NSaved= 1 IEnMin= 1 EnMin= -1898.81414051297     IErMin= 1 ErrMin= 2.37D-02
 ErrMax= 2.37D-02 EMaxC= 1.00D-01 BMatC= 3.18D+00 BMatP= 3.18D+00
 IDIUse=3 WtCom= 7.63D-01 WtEn= 2.37D-01
 Coeff-Com:  0.100D+01
 Coeff-En:   0.100D+01
 Coeff:      0.100D+01
 Gap=     0.197 Goal=   None    Shift=    0.000
 Gap=     0.197 Goal=   None    Shift=    0.000
 GapD=    0.197 DampG=1.000 DampE=0.500 DampFc=0.5000 IDamp=-1.
 Damping current iteration by 5.00D-01
 RMSDP=3.12D-03 MaxDP=2.24D-01              OVMax= 2.46D-01

 Cycle   2  Pass 1  IDiag  1:
 RMSU=  1.10D-03    CP:  9.88D-01
 E= -1899.05999679753     Delta-E=       -0.245856284560 Rises=F Damp=T
 DIIS: error= 8.04D-03 at cycle   2 NSaved=   2.
 NSaved= 2 IEnMin= 2 EnMin= -1899.05999679753     IErMin= 2 ErrMin= 8.04D-03
 ErrMax= 8.04D-03 EMaxC= 1.00D-01 BMatC= 4.59D-01 BMatP= 3.18D+00
 IDIUse=3 WtCom= 9.20D-01 WtEn= 8.04D-02
 Coeff-Com:  0.196D+00 0.804D+00
 Coeff-En:   0.292D+00 0.708D+00
 Coeff:      0.204D+00 0.796D+00
 Gap=     0.174 Goal=   None    Shift=    0.000
 Gap=     0.174 Goal=   None    Shift=    0.000
 RMSDP=9.65D-04 MaxDP=6.24D-02 DE=-2.46D-01 OVMax= 1.88D-01

 Cycle   3  Pass 1  IDiag  1:
 RMSU=  6.39D-04    CP:  9.80D-01  7.94D-01
 E= -1899.48384147612     Delta-E=       -0.423844678588 Rises=F Damp=F
 DIIS: error= 8.84D-03 at cycle   3 NSaved=   3.
 NSaved= 3 IEnMin= 3 EnMin= -1899.48384147612     IErMin= 2 ErrMin= 8.04D-03
 ErrMax= 8.84D-03 EMaxC= 1.00D-01 BMatC= 4.58D-01 BMatP= 4.59D-01
 IDIUse=3 WtCom= 9.12D-01 WtEn= 8.84D-02
 Coeff-Com:  0.470D-01 0.494D+00 0.459D+00
 Coeff-En:   0.000D+00 0.000D+00 0.100D+01
 Coeff:      0.428D-01 0.450D+00 0.507D+00
 Gap=     0.161 Goal=   None    Shift=    0.000
 Gap=     0.161 Goal=   None    Shift=    0.000
 RMSDP=5.67D-04 MaxDP=5.05D-02 DE=-4.24D-01 OVMax= 5.52D-02

 Cycle   4  Pass 1  IDiag  1:
 RMSU=  2.32D-04    CP:  9.83D-01  8.94D-01  5.20D-01
 E= -1899.57346368508     Delta-E=       -0.089622208960 Rises=F Damp=F
 DIIS: error= 3.47D-03 at cycle   4 NSaved=   4.
 NSaved= 4 IEnMin= 4 EnMin= -1899.57346368508     IErMin= 4 ErrMin= 3.47D-03
 ErrMax= 3.47D-03 EMaxC= 1.00D-01 BMatC= 5.00D-02 BMatP= 4.58D-01
 IDIUse=3 WtCom= 9.65D-01 WtEn= 3.47D-02
 Coeff-Com:  0.829D-02 0.121D+00 0.277D+00 0.595D+00
 Coeff-En:   0.000D+00 0.000D+00 0.826D-01 0.917D+00
 Coeff:      0.800D-02 0.116D+00 0.270D+00 0.606D+00
 Gap=     0.159 Goal=   None    Shift=    0.000
 Gap=     0.159 Goal=   None    Shift=    0.000
 RMSDP=1.67D-04 MaxDP=1.35D-02 DE=-8.96D-02 OVMax= 1.84D-02

 Cycle   5  Pass 1  IDiag  1:
 RMSU=  6.94D-05    CP:  9.82D-01  8.59D-01  6.14D-01  7.30D-01
 E= -1899.58268915785     Delta-E=       -0.009225472767 Rises=F Damp=F
 DIIS: error= 8.72D-04 at cycle   5 NSaved=   5.
 NSaved= 5 IEnMin= 5 EnMin= -1899.58268915785     IErMin= 5 ErrMin= 8.72D-04
 ErrMax= 8.72D-04 EMaxC= 1.00D-01 BMatC= 4.44D-03 BMatP= 5.00D-02
 IDIUse=3 WtCom= 9.91D-01 WtEn= 8.72D-03
 Coeff-Com:  0.522D-03 0.190D-01 0.105D+00 0.346D+00 0.530D+00
 Coeff-En:   0.000D+00 0.000D+00 0.000D+00 0.353D-01 0.965D+00
 Coeff:      0.518D-03 0.189D-01 0.104D+00 0.343D+00 0.534D+00
 Gap=     0.159 Goal=   None    Shift=    0.000
 Gap=     0.159 Goal=   None    Shift=    0.000
 RMSDP=5.72D-05 MaxDP=3.74D-03 DE=-9.23D-03 OVMax= 6.99D-03

 Cycle   6  Pass 1  IDiag  1:
 RMSU=  2.36D-05    CP:  9.82D-01  8.65D-01  6.14D-01  7.60D-01  5.49D-01
 E= -1899.58368106652     Delta-E=       -0.000991908668 Rises=F Damp=F
 DIIS: error= 2.78D-04 at cycle   6 NSaved=   6.
 NSaved= 6 IEnMin= 6 EnMin= -1899.58368106652     IErMin= 6 ErrMin= 2.78D-04
 ErrMax= 2.78D-04 EMaxC= 1.00D-01 BMatC= 3.65D-04 BMatP= 4.44D-03
 IDIUse=3 WtCom= 9.97D-01 WtEn= 2.78D-03
 Coeff-Com: -0.545D-03-0.662D-03 0.302D-01 0.125D+00 0.293D+00 0.554D+00
 Coeff-En:   0.000D+00 0.000D+00 0.000D+00 0.000D+00 0.208D-01 0.979D+00
 Coeff:     -0.544D-03-0.660D-03 0.301D-01 0.124D+00 0.292D+00 0.555D+00
 Gap=     0.159 Goal=   None    Shift=    0.000
 Gap=     0.159 Goal=   None    Shift=    0.000
 RMSDP=1.63D-05 MaxDP=1.04D-03 DE=-9.92D-04 OVMax= 2.30D-03

 Cycle   7  Pass 1  IDiag  1:
 RMSU=  6.80D-06    CP:  9.82D-01  8.65D-01  6.15D-01  7.66D-01  6.10D-01
                    CP:  6.55D-01
 E= -1899.58376686256     Delta-E=       -0.000085796042 Rises=F Damp=F
 DIIS: error= 6.30D-05 at cycle   7 NSaved=   7.
 NSaved= 7 IEnMin= 7 EnMin= -1899.58376686256     IErMin= 7 ErrMin= 6.30D-05
 ErrMax= 6.30D-05 EMaxC= 1.00D-01 BMatC= 3.32D-05 BMatP= 3.65D-04
 IDIUse=1 WtCom= 1.00D+00 WtEn= 0.00D+00
 Coeff-Com: -0.282D-03-0.168D-02 0.877D-02 0.411D-01 0.123D+00 0.311D+00
 Coeff-Com:  0.519D+00
 Coeff:     -0.282D-03-0.168D-02 0.877D-02 0.411D-01 0.123D+00 0.311D+00
 Coeff:      0.519D+00
 Gap=     0.159 Goal=   None    Shift=    0.000
 Gap=     0.159 Goal=   None    Shift=    0.000
 RMSDP=4.76D-06 MaxDP=4.89D-04 DE=-8.58D-05 OVMax= 5.88D-04

 Cycle   8  Pass 1  IDiag  1:
 RMSU=  1.88D-06    CP:  9.82D-01  8.65D-01  6.15D-01  7.67D-01  6.14D-01
                    CP:  6.92D-01  6.14D-01
 E= -1899.58377373335     Delta-E=       -0.000006870795 Rises=F Damp=F
 DIIS: error= 2.14D-05 at cycle   8 NSaved=   8.
 NSaved= 8 IEnMin= 8 EnMin= -1899.58377373335     IErMin= 8 ErrMin= 2.14D-05
 ErrMax= 2.14D-05 EMaxC= 1.00D-01 BMatC= 3.65D-06 BMatP= 3.32D-05
 IDIUse=1 WtCom= 1.00D+00 WtEn= 0.00D+00
 Coeff-Com: -0.108D-03-0.112D-02 0.235D-02 0.125D-01 0.472D-01 0.135D+00
 Coeff-Com:  0.303D+00 0.501D+00
 Coeff:     -0.108D-03-0.112D-02 0.235D-02 0.125D-01 0.472D-01 0.135D+00
 Coeff:      0.303D+00 0.501D+00
 Gap=     0.159 Goal=   None    Shift=    0.000
 Gap=     0.159 Goal=   None    Shift=    0.000
 RMSDP=1.37D-06 MaxDP=1.76D-04 DE=-6.87D-06 OVMax= 1.80D-04

 Cycle   9  Pass 1  IDiag  1:
 RMSU=  6.17D-07    CP:  9.82D-01  8.65D-01  6.15D-01  7.67D-01  6.14D-01
                    CP:  6.93D-01  6.61D-01  6.62D-01
 E= -1899.58377448186     Delta-E=       -0.000000748505 Rises=F Damp=F
 DIIS: error= 5.13D-06 at cycle   9 NSaved=   9.
 NSaved= 9 IEnMin= 9 EnMin= -1899.58377448186     IErMin= 9 ErrMin= 5.13D-06
 ErrMax= 5.13D-06 EMaxC= 1.00D-01 BMatC= 2.35D-07 BMatP= 3.65D-06
 IDIUse=1 WtCom= 1.00D+00 WtEn= 0.00D+00
 Coeff-Com:  0.315D-05-0.261D-03 0.131D-05-0.753D-05 0.540D-02 0.187D-01
 Coeff-Com:  0.635D-01 0.226D+00 0.687D+00
 Coeff:      0.315D-05-0.261D-03 0.131D-05-0.753D-05 0.540D-02 0.187D-01
 Coeff:      0.635D-01 0.226D+00 0.687D+00
 Gap=     0.159 Goal=   None    Shift=    0.000
 Gap=     0.159 Goal=   None    Shift=    0.000
 RMSDP=4.09D-07 MaxDP=3.82D-05 DE=-7.49D-07 OVMax= 7.30D-05

 Cycle  10  Pass 1  IDiag  1:
 RMSU=  2.08D-07    CP:  9.82D-01  8.65D-01  6.16D-01  7.67D-01  6.15D-01
                    CP:  6.94D-01  6.65D-01  7.30D-01  8.10D-01
 E= -1899.58377452901     Delta-E=       -0.000000047146 Rises=F Damp=F
 DIIS: error= 2.51D-06 at cycle  10 NSaved=  10.
 NSaved=10 IEnMin=10 EnMin= -1899.58377452901     IErMin=10 ErrMin= 2.51D-06
 ErrMax= 2.51D-06 EMaxC= 1.00D-01 BMatC= 3.90D-08 BMatP= 2.35D-07
 IDIUse=1 WtCom= 1.00D+00 WtEn= 0.00D+00
 Coeff-Com:  0.871D-05-0.686D-04-0.161D-03-0.942D-03-0.368D-03 0.438D-03
 Coeff-Com:  0.124D-01 0.854D-01 0.389D+00 0.514D+00
 Coeff:      0.871D-05-0.686D-04-0.161D-03-0.942D-03-0.368D-03 0.438D-03
 Coeff:      0.124D-01 0.854D-01 0.389D+00 0.514D+00
 Gap=     0.159 Goal=   None    Shift=    0.000
 Gap=     0.159 Goal=   None    Shift=    0.000
 RMSDP=1.61D-07 MaxDP=1.34D-05 DE=-4.71D-08 OVMax= 2.22D-05

 Cycle  11  Pass 1  IDiag  1:
 RMSU=  7.37D-08    CP:  9.82D-01  8.65D-01  6.16D-01  7.67D-01  6.15D-01
                    CP:  6.95D-01  6.67D-01  7.35D-01  8.77D-01  6.68D-01
 E= -1899.58377453727     Delta-E=       -0.000000008267 Rises=F Damp=F
 DIIS: error= 9.18D-07 at cycle  11 NSaved=  11.
 NSaved=11 IEnMin=11 EnMin= -1899.58377453727     IErMin=11 ErrMin= 9.18D-07
 ErrMax= 9.18D-07 EMaxC= 1.00D-01 BMatC= 4.03D-09 BMatP= 3.90D-08
 IDIUse=1 WtCom= 1.00D+00 WtEn= 0.00D+00
 Coeff-Com:  0.384D-05 0.367D-05-0.876D-04-0.530D-03-0.992D-03-0.256D-02
 Coeff-Com: -0.285D-02 0.109D-01 0.111D+00 0.280D+00 0.606D+00
 Coeff:      0.384D-05 0.367D-05-0.876D-04-0.530D-03-0.992D-03-0.256D-02
 Coeff:     -0.285D-02 0.109D-01 0.111D+00 0.280D+00 0.606D+00
 Gap=     0.159 Goal=   None    Shift=    0.000
 Gap=     0.159 Goal=   None    Shift=    0.000
 RMSDP=5.71D-08 MaxDP=4.81D-06 DE=-8.27D-09 OVMax= 8.79D-06

 Cycle  12  Pass 1  IDiag  1:
 RMSU=  2.68D-08    CP:  9.82D-01  8.65D-01  6.16D-01  7.67D-01  6.15D-01
                    CP:  6.95D-01  6.67D-01  7.39D-01  8.87D-01  7.42D-01
                    CP:  6.82D-01
 E= -1899.58377453793     Delta-E=       -0.000000000654 Rises=F Damp=F
 DIIS: error= 4.53D-07 at cycle  12 NSaved=  12.
 NSaved=12 IEnMin=12 EnMin= -1899.58377453793     IErMin=12 ErrMin= 4.53D-07
 ErrMax= 4.53D-07 EMaxC= 1.00D-01 BMatC= 8.21D-10 BMatP= 4.03D-09
 IDIUse=1 WtCom= 1.00D+00 WtEn= 0.00D+00
 Coeff-Com:  0.126D-05 0.102D-04-0.377D-04-0.229D-03-0.574D-03-0.161D-02
 Coeff-Com: -0.302D-02-0.278D-02 0.264D-01 0.115D+00 0.381D+00 0.486D+00
 Coeff:      0.126D-05 0.102D-04-0.377D-04-0.229D-03-0.574D-03-0.161D-02
 Coeff:     -0.302D-02-0.278D-02 0.264D-01 0.115D+00 0.381D+00 0.486D+00
 Gap=     0.159 Goal=   None    Shift=    0.000
 Gap=     0.159 Goal=   None    Shift=    0.000
 RMSDP=2.33D-08 MaxDP=1.99D-06 DE=-6.54D-10 OVMax= 4.33D-06

 Cycle  13  Pass 1  IDiag  1:
 RMSU=  9.78D-09    CP:  9.82D-01  8.65D-01  6.16D-01  7.67D-01  6.15D-01
                    CP:  6.95D-01  6.67D-01  7.39D-01  8.91D-01  7.51D-01
                    CP:  7.45D-01  5.67D-01
 E= -1899.58377453814     Delta-E=       -0.000000000216 Rises=F Damp=F
 DIIS: error= 7.91D-08 at cycle  13 NSaved=  13.
 NSaved=13 IEnMin=13 EnMin= -1899.58377453814     IErMin=13 ErrMin= 7.91D-08
 ErrMax= 7.91D-08 EMaxC= 1.00D-01 BMatC= 5.26D-11 BMatP= 8.21D-10
 IDIUse=1 WtCom= 1.00D+00 WtEn= 0.00D+00
 Coeff-Com: -0.260D-07 0.477D-05-0.760D-05-0.454D-04-0.162D-03-0.476D-03
 Coeff-Com: -0.114D-02-0.305D-02-0.127D-02 0.191D-01 0.113D+00 0.250D+00
 Coeff-Com:  0.625D+00
 Coeff:     -0.260D-07 0.477D-05-0.760D-05-0.454D-04-0.162D-03-0.476D-03
 Coeff:     -0.114D-02-0.305D-02-0.127D-02 0.191D-01 0.113D+00 0.250D+00
 Coeff:      0.625D+00
 Gap=     0.159 Goal=   None    Shift=    0.000
 Gap=     0.159 Goal=   None    Shift=    0.000
 RMSDP=6.49D-09 MaxDP=4.52D-07 DE=-2.16D-10 OVMax= 1.11D-06

 Error on total polarization charges =  0.01332
 SCF Done:  E(UB3LYP) =  -1899.58377454     A.U. after   13 cycles
             Convg  =    0.6487D-08             -V/T =  2.0068
 <Sx>= 0.0000 <Sy>= 0.0000 <Sz>= 0.0000 <S**2>= 0.0000 S= 0.0000
 <L.S>= 0.000000000000E+00
 KE= 1.886698383942D+03 PE=-1.276838075658D+04 EE= 4.815389139149D+03
 Annihilation of the first spin contaminant:
 S**2 before annihilation     0.0000,   after     0.0000
 Leave Link  502 at Thu Oct 13 22:40:11 2016, MaxMem= 1342177280 cpu:    7981.5
 (Enter /opt/software/g09/l601.exe)
 Copying SCF densities to generalized density rwf, IOpCl= 1 IROHF=0.

 **********************************************************************

            Population analysis using the SCF density.

 **********************************************************************

 Orbital symmetries:
 Alpha Orbitals:
       Occupied  (A) (A) (A) (A) (A) (A) (A) (A) (A) (A) (A) (A)
                 (A) (A) (A) (A) (A) (A) (A) (A) (A) (A) (A) (A)
                 (A) (A) (A) (A) (A) (A) (A) (A) (A) (A) (A) (A)
                 (A) (A) (A) (A) (A) (A) (A) (A) (A) (A) (A) (A)
                 (A) (A) (A) (A) (A) (A) (A) (A) (A) (A) (A) (A)
                 (A) (A) (A) (A) (A) (A) (A) (A) (A) (A) (A) (A)
                 (A) (A) (A) (A) (A) (A) (A) (A) (A) (A) (A) (A)
                 (A) (A) (A) (A) (A) (A) (A) (A) (A) (A) (A) (A)
                 (A) (A) (A) (A) (A) (A) (A) (A) (A) (A) (A) (A)
                 (A) (A) (A) (A) (A) (A) (A) (A) (A) (A) (A) (A)
                 (A) (A) (A) (A) (A) (A) (A) (A) (A) (A) (A) (A)
                 (A) (A) (A) (A) (A) (A) (A) (A) (A) (A) (A)
       Virtual   (A) (A) (A) (A) (A) (A) (A) (A) (A) (A) (A) (A)
                 (A) (A) (A) (A) (A) (A) (A) (A) (A) (A) (A) (A)
                 (A) (A) (A) (A) (A) (A) (A) (A) (A) (A) (A) (A)
                 (A) (A) (A) (A) (A) (A) (A) (A) (A) (A) (A) (A)
                 (A) (A) (A) (A) (A) (A) (A) (A) (A) (A) (A) (A)
                 (A) (A) (A) (A) (A) (A) (A) (A) (A) (A) (A) (A)
                 (A) (A) (A) (A) (A) (A) (A) (A) (A) (A) (A) (A)
                 (A) (A) (A) (A) (A) (A) (A) (A) (A) (A) (A) (A)
                 (A) (A) (A) (A) (A) (A) (A) (A) (A) (A) (A) (A)
                 (A) (A) (A) (A) (A) (A) (A) (A) (A) (A) (A) (A)
                 (A) (A) (A) (A) (A) (A) (A) (A) (A) (A) (A) (A)
                 (A) (A) (A) (A) (A) (A) (A) (A) (A) (A) (A) (A)
                 (A) (A) (A) (A) (A) (A) (A) (A) (A) (A) (A) (A)
                 (A) (A) (A) (A) (A) (A) (A) (A) (A) (A) (A) (A)
                 (A) (A) (A) (A) (A) (A) (A) (A) (A) (A) (A) (A)
                 (A) (A) (A) (A) (A) (A) (A) (A) (A) (A) (A) (A)
                 (A) (A) (A) (A) (A) (A) (A) (A) (A) (A) (A) (A)
                 (A) (A) (A) (A) (A) (A) (A) (A) (A) (A) (A) (A)
                 (A) (A) (A) (A) (A) (A) (A) (A) (A) (A) (A) (A)
                 (A) (A) (A) (A) (A) (A) (A) (A) (A) (A) (A) (A)
                 (A) (A) (A) (A) (A) (A) (A) (A) (A) (A) (A) (A)
                 (A) (A) (A) (A) (A) (A) (A) (A) (A) (A) (A) (A)
                 (A) (A) (A) (A) (A) (A) (A) (A) (A) (A) (A) (A)
                 (A) (A) (A) (A) (A) (A) (A) (A) (A) (A) (A) (A)
                 (A) (A) (A) (A) (A) (A) (A) (A) (A) (A) (A) (A)
                 (A) (A) (A) (A) (A) (A) (A) (A) (A) (A) (A) (A)
                 (A) (A) (A) (A) (A) (A) (A) (A) (A) (A) (A) (A)
                 (A) (A) (A) (A) (A) (A) (A) (A) (A) (A) (A) (A)
                 (A) (A) (A) (A) (A) (A) (A) (A) (A) (A) (A) (A)
                 (A) (A) (A) (A) (A) (A) (A) (A) (A) (A) (A) (A)
                 (A) (A) (A) (A) (A) (A) (A) (A) (A) (A) (A) (A)
                 (A) (A) (A) (A) (A) (A) (A) (A) (A) (A) (A) (A)
                 (A) (A) (A) (A) (A) (A) (A) (A) (A) (A) (A) (A)
                 (A) (A) (A) (A) (A) (A) (A) (A) (A) (A) (A) (A)
                 (A) (A) (A) (A) (A) (A) (A) (A) (A) (A) (A) (A)
                 (A) (A) (A) (A) (A) (A) (A) (A) (A) (A) (A) (A)
                 (A) (A) (A) (A) (A) (A) (A) (A) (A) (A) (A) (A)
                 (A) (A) (A) (A) (A) (A) (A) (A) (A) (A) (A) (A)
                 (A) (A) (A) (A) (A) (A) (A) (A) (A) (A) (A) (A)
                 (A) (A) (A) (A) (A) (A) (A) (A) (A) (A) (A) (A)
                 (A) (A) (A) (A) (A) (A) (A) (A) (A) (A) (A) (A)
                 (A) (A) (A) (A) (A) (A) (A) (A) (A) (A) (A) (A)
                 (A) (A) (A) (A) (A) (A) (A) (A) (A) (A) (A) (A)
                 (A) (A) (A) (A) (A) (A) (A) (A) (A) (A) (A) (A)
                 (A) (A) (A) (A) (A) (A) (A) (A) (A) (A) (A) (A)
                 (A) (A) (A) (A) (A) (A) (A)
 Beta  Orbitals:
       Occupied  (A) (A) (A) (A) (A) (A) (A) (A) (A) (A) (A) (A)
                 (A) (A) (A) (A) (A) (A) (A) (A) (A) (A) (A) (A)
                 (A) (A) (A) (A) (A) (A) (A) (A) (A) (A) (A) (A)
                 (A) (A) (A) (A) (A) (A) (A) (A) (A) (A) (A) (A)
                 (A) (A) (A) (A) (A) (A) (A) (A) (A) (A) (A) (A)
                 (A) (A) (A) (A) (A) (A) (A) (A) (A) (A) (A) (A)
                 (A) (A) (A) (A) (A) (A) (A) (A) (A) (A) (A) (A)
                 (A) (A) (A) (A) (A) (A) (A) (A) (A) (A) (A) (A)
                 (A) (A) (A) (A) (A) (A) (A) (A) (A) (A) (A) (A)
                 (A) (A) (A) (A) (A) (A) (A) (A) (A) (A) (A) (A)
                 (A) (A) (A) (A) (A) (A) (A) (A) (A) (A) (A) (A)
                 (A) (A) (A) (A) (A) (A) (A) (A) (A) (A) (A)
       Virtual   (A) (A) (A) (A) (A) (A) (A) (A) (A) (A) (A) (A)
                 (A) (A) (A) (A) (A) (A) (A) (A) (A) (A) (A) (A)
                 (A) (A) (A) (A) (A) (A) (A) (A) (A) (A) (A) (A)
                 (A) (A) (A) (A) (A) (A) (A) (A) (A) (A) (A) (A)
                 (A) (A) (A) (A) (A) (A) (A) (A) (A) (A) (A) (A)
                 (A) (A) (A) (A) (A) (A) (A) (A) (A) (A) (A) (A)
                 (A) (A) (A) (A) (A) (A) (A) (A) (A) (A) (A) (A)
                 (A) (A) (A) (A) (A) (A) (A) (A) (A) (A) (A) (A)
                 (A) (A) (A) (A) (A) (A) (A) (A) (A) (A) (A) (A)
                 (A) (A) (A) (A) (A) (A) (A) (A) (A) (A) (A) (A)
                 (A) (A) (A) (A) (A) (A) (A) (A) (A) (A) (A) (A)
                 (A) (A) (A) (A) (A) (A) (A) (A) (A) (A) (A) (A)
                 (A) (A) (A) (A) (A) (A) (A) (A) (A) (A) (A) (A)
                 (A) (A) (A) (A) (A) (A) (A) (A) (A) (A) (A) (A)
                 (A) (A) (A) (A) (A) (A) (A) (A) (A) (A) (A) (A)
                 (A) (A) (A) (A) (A) (A) (A) (A) (A) (A) (A) (A)
                 (A) (A) (A) (A) (A) (A) (A) (A) (A) (A) (A) (A)
                 (A) (A) (A) (A) (A) (A) (A) (A) (A) (A) (A) (A)
                 (A) (A) (A) (A) (A) (A) (A) (A) (A) (A) (A) (A)
                 (A) (A) (A) (A) (A) (A) (A) (A) (A) (A) (A) (A)
                 (A) (A) (A) (A) (A) (A) (A) (A) (A) (A) (A) (A)
                 (A) (A) (A) (A) (A) (A) (A) (A) (A) (A) (A) (A)
                 (A) (A) (A) (A) (A) (A) (A) (A) (A) (A) (A) (A)
                 (A) (A) (A) (A) (A) (A) (A) (A) (A) (A) (A) (A)
                 (A) (A) (A) (A) (A) (A) (A) (A) (A) (A) (A) (A)
                 (A) (A) (A) (A) (A) (A) (A) (A) (A) (A) (A) (A)
                 (A) (A) (A) (A) (A) (A) (A) (A) (A) (A) (A) (A)
                 (A) (A) (A) (A) (A) (A) (A) (A) (A) (A) (A) (A)
                 (A) (A) (A) (A) (A) (A) (A) (A) (A) (A) (A) (A)
                 (A) (A) (A) (A) (A) (A) (A) (A) (A) (A) (A) (A)
                 (A) (A) (A) (A) (A) (A) (A) (A) (A) (A) (A) (A)
                 (A) (A) (A) (A) (A) (A) (A) (A) (A) (A) (A) (A)
                 (A) (A) (A) (A) (A) (A) (A) (A) (A) (A) (A) (A)
                 (A) (A) (A) (A) (A) (A) (A) (A) (A) (A) (A) (A)
                 (A) (A) (A) (A) (A) (A) (A) (A) (A) (A) (A) (A)
                 (A) (A) (A) (A) (A) (A) (A) (A) (A) (A) (A) (A)
                 (A) (A) (A) (A) (A) (A) (A) (A) (A) (A) (A) (A)
                 (A) (A) (A) (A) (A) (A) (A) (A) (A) (A) (A) (A)
                 (A) (A) (A) (A) (A) (A) (A) (A) (A) (A) (A) (A)
                 (A) (A) (A) (A) (A) (A) (A) (A) (A) (A) (A) (A)
                 (A) (A) (A) (A) (A) (A) (A) (A) (A) (A) (A) (A)
                 (A) (A) (A) (A) (A) (A) (A) (A) (A) (A) (A) (A)
                 (A) (A) (A) (A) (A) (A) (A) (A) (A) (A) (A) (A)
                 (A) (A) (A) (A) (A) (A) (A) (A) (A) (A) (A) (A)
                 (A) (A) (A) (A) (A) (A) (A) (A) (A) (A) (A) (A)
                 (A) (A) (A) (A) (A) (A) (A)
 The electronic state is 1-A.
 Alpha  occ. eigenvalues --  -19.18299 -19.17422 -19.16595 -19.15602 -19.14525
 Alpha  occ. eigenvalues --  -19.13192 -19.12856 -14.40942 -14.40073 -14.39887
 Alpha  occ. eigenvalues --  -14.38484 -14.37838 -14.37372 -10.31338 -10.30115
 Alpha  occ. eigenvalues --  -10.30091 -10.27535 -10.26243 -10.26067 -10.25525
 Alpha  occ. eigenvalues --  -10.24206 -10.23810 -10.23786 -10.20848 -10.20623
 Alpha  occ. eigenvalues --  -10.20422 -10.20054 -10.20001 -10.19734 -10.19710
 Alpha  occ. eigenvalues --  -10.19675 -10.19644 -10.19539 -10.19393 -10.19383
 Alpha  occ. eigenvalues --  -10.19116 -10.18811 -10.18607 -10.18413 -10.18337
 Alpha  occ. eigenvalues --   -1.07559  -1.07027  -1.06487  -1.05828  -1.05681
 Alpha  occ. eigenvalues --   -1.04062  -1.03313  -1.01613  -1.00979  -1.00206
 Alpha  occ. eigenvalues --   -0.87344  -0.87281  -0.87228  -0.84971  -0.84817
 Alpha  occ. eigenvalues --   -0.84773  -0.80664  -0.76939  -0.76881  -0.76460
 Alpha  occ. eigenvalues --   -0.74694  -0.74574  -0.74445  -0.73846  -0.69151
 Alpha  occ. eigenvalues --   -0.66407  -0.66273  -0.64236  -0.63465  -0.62790
 Alpha  occ. eigenvalues --   -0.61696  -0.60828  -0.60671  -0.59812  -0.59619
 Alpha  occ. eigenvalues --   -0.59074  -0.58382  -0.56165  -0.55431  -0.54723
 Alpha  occ. eigenvalues --   -0.53330  -0.53143  -0.52691  -0.51267  -0.51247
 Alpha  occ. eigenvalues --   -0.50614  -0.49637  -0.49212  -0.48714  -0.48368
 Alpha  occ. eigenvalues --   -0.46737  -0.46456  -0.46085  -0.45894  -0.45599
 Alpha  occ. eigenvalues --   -0.44749  -0.44568  -0.44414  -0.44315  -0.44005
 Alpha  occ. eigenvalues --   -0.43511  -0.42898  -0.42680  -0.42636  -0.42599
 Alpha  occ. eigenvalues --   -0.42206  -0.41559  -0.41211  -0.40683  -0.40433
 Alpha  occ. eigenvalues --   -0.39882  -0.39475  -0.39410  -0.39146  -0.37224
 Alpha  occ. eigenvalues --   -0.36862  -0.36701  -0.36547  -0.36322  -0.36060
 Alpha  occ. eigenvalues --   -0.35596  -0.35382  -0.35233  -0.35047  -0.34471
 Alpha  occ. eigenvalues --   -0.33978  -0.33895  -0.30863  -0.29745  -0.29289
 Alpha  occ. eigenvalues --   -0.29157  -0.29070  -0.28715  -0.28524  -0.27843
 Alpha  occ. eigenvalues --   -0.27181  -0.25610  -0.24439  -0.24377  -0.23980
 Alpha  occ. eigenvalues --   -0.22326  -0.22148  -0.21675
 Alpha virt. eigenvalues --   -0.05737  -0.05598  -0.05367  -0.00378  -0.00332
 Alpha virt. eigenvalues --    0.00055   0.00385   0.01081   0.02351   0.04513
 Alpha virt. eigenvalues --    0.04756   0.05433   0.08009   0.08493   0.08599
 Alpha virt. eigenvalues --    0.09088   0.09303   0.09649   0.09805   0.10180
 Alpha virt. eigenvalues --    0.11072   0.11988   0.12335   0.13046   0.14191
 Alpha virt. eigenvalues --    0.14369   0.14901   0.15846   0.16173   0.16348
 Alpha virt. eigenvalues --    0.16557   0.16610   0.16856   0.16997   0.17205
 Alpha virt. eigenvalues --    0.17512   0.17693   0.18075   0.18335   0.18687
 Alpha virt. eigenvalues --    0.19275   0.19655   0.20626   0.21145   0.21419
 Alpha virt. eigenvalues --    0.21993   0.22657   0.24037   0.24713   0.24771
 Alpha virt. eigenvalues --    0.24968   0.26021   0.26533   0.26882   0.27302
 Alpha virt. eigenvalues --    0.29088   0.29302   0.29974   0.30363   0.31864
 Alpha virt. eigenvalues --    0.32344   0.32732   0.32916   0.33305   0.33735
 Alpha virt. eigenvalues --    0.34105   0.34333   0.35097   0.35382   0.37568
 Alpha virt. eigenvalues --    0.38787   0.39123   0.39915   0.40329   0.40608
 Alpha virt. eigenvalues --    0.41188   0.42255   0.48227   0.49114   0.49355
 Alpha virt. eigenvalues --    0.49860   0.50169   0.50229   0.50315   0.50434
 Alpha virt. eigenvalues --    0.50676   0.51176   0.51486   0.52162   0.53211
 Alpha virt. eigenvalues --    0.53709   0.53827   0.53976   0.54142   0.54823
 Alpha virt. eigenvalues --    0.55446   0.55618   0.55763   0.56023   0.56291
 Alpha virt. eigenvalues --    0.57489   0.57609   0.58178   0.58490   0.58548
 Alpha virt. eigenvalues --    0.58763   0.58833   0.58871   0.59058   0.59680
 Alpha virt. eigenvalues --    0.60004   0.60153   0.60687   0.60709   0.60860
 Alpha virt. eigenvalues --    0.60965   0.61428   0.61582   0.61665   0.61722
 Alpha virt. eigenvalues --    0.61892   0.62190   0.62298   0.62510   0.62593
 Alpha virt. eigenvalues --    0.62842   0.63582   0.63968   0.64720   0.64767
 Alpha virt. eigenvalues --    0.64848   0.65106   0.65920   0.66071   0.67105
 Alpha virt. eigenvalues --    0.67715   0.68312   0.68561   0.68983   0.69459
 Alpha virt. eigenvalues --    0.70549   0.72147   0.72799   0.73368   0.74437
 Alpha virt. eigenvalues --    0.75353   0.76686   0.76859   0.77469   0.77601
 Alpha virt. eigenvalues --    0.77887   0.78471   0.78750   0.78965   0.79397
 Alpha virt. eigenvalues --    0.80126   0.80770   0.80923   0.81342   0.81640
 Alpha virt. eigenvalues --    0.81791   0.82032   0.82347   0.82544   0.82614
 Alpha virt. eigenvalues --    0.83081   0.83507   0.83700   0.84151   0.84291
 Alpha virt. eigenvalues --    0.84758   0.85112   0.85437   0.85839   0.86090
 Alpha virt. eigenvalues --    0.87084   0.87306   0.87857   0.88457   0.88749
 Alpha virt. eigenvalues --    0.89124   0.89296   0.89885   0.91345   0.91708
 Alpha virt. eigenvalues --    0.93033   0.93283   0.94640   0.95158   0.95234
 Alpha virt. eigenvalues --    0.95965   0.96413   0.96916   0.97068   0.98272
 Alpha virt. eigenvalues --    0.99127   0.99553   1.00247   1.00840   1.01571
 Alpha virt. eigenvalues --    1.01783   1.02849   1.03118   1.04202   1.04797
 Alpha virt. eigenvalues --    1.05583   1.05991   1.06650   1.06973   1.07401
 Alpha virt. eigenvalues --    1.08006   1.08176   1.09229   1.09346   1.10192
 Alpha virt. eigenvalues --    1.10756   1.11297   1.11710   1.12014   1.12936
 Alpha virt. eigenvalues --    1.13723   1.15418   1.16768   1.16916   1.17417
 Alpha virt. eigenvalues --    1.18078   1.19785   1.20765   1.21818   1.22731
 Alpha virt. eigenvalues --    1.22982   1.23306   1.23347   1.23826   1.23929
 Alpha virt. eigenvalues --    1.24275   1.25921   1.26181   1.26704   1.27095
 Alpha virt. eigenvalues --    1.27432   1.27714   1.28626   1.29073   1.29888
 Alpha virt. eigenvalues --    1.30162   1.31242   1.32162   1.32700   1.33051
 Alpha virt. eigenvalues --    1.33983   1.34244   1.34363   1.34707   1.35066
 Alpha virt. eigenvalues --    1.36553   1.36954   1.37330   1.38021   1.38234
 Alpha virt. eigenvalues --    1.38748   1.39210   1.39588   1.40403   1.40515
 Alpha virt. eigenvalues --    1.40530   1.40980   1.41044   1.41130   1.41299
 Alpha virt. eigenvalues --    1.41593   1.43152   1.44154   1.44665   1.44732
 Alpha virt. eigenvalues --    1.46157   1.47829   1.48070   1.51470   1.51954
 Alpha virt. eigenvalues --    1.53091   1.55016   1.56573   1.57321   1.58130
 Alpha virt. eigenvalues --    1.58702   1.58879   1.59974   1.60440   1.61046
 Alpha virt. eigenvalues --    1.61429   1.63035   1.64730   1.67256   1.68819
 Alpha virt. eigenvalues --    1.69651   1.71522   1.71696   1.71829   1.73090
 Alpha virt. eigenvalues --    1.73679   1.74175   1.74881   1.75214   1.75978
 Alpha virt. eigenvalues --    1.76840   1.77090   1.77298   1.78182   1.78601
 Alpha virt. eigenvalues --    1.78929   1.79282   1.79535   1.79645   1.80251
 Alpha virt. eigenvalues --    1.80567   1.80761   1.81373   1.82247   1.82560
 Alpha virt. eigenvalues --    1.83015   1.83981   1.85515   1.85790   1.86038
 Alpha virt. eigenvalues --    1.86542   1.86943   1.87669   1.88049   1.88442
 Alpha virt. eigenvalues --    1.89575   1.89929   1.90385   1.90958   1.91793
 Alpha virt. eigenvalues --    1.91917   1.92230   1.92521   1.92794   1.93407
 Alpha virt. eigenvalues --    1.93711   1.94401   1.94457   1.95316   1.96106
 Alpha virt. eigenvalues --    1.97466   1.97501   1.98230   1.98938   1.99243
 Alpha virt. eigenvalues --    1.99282   1.99418   2.00179   2.00932   2.01355
 Alpha virt. eigenvalues --    2.01935   2.02834   2.03759   2.04309   2.04487
 Alpha virt. eigenvalues --    2.05013   2.05388   2.05448   2.06516   2.07389
 Alpha virt. eigenvalues --    2.08267   2.08886   2.09874   2.10917   2.12334
 Alpha virt. eigenvalues --    2.13551   2.13970   2.14242   2.15536   2.15885
 Alpha virt. eigenvalues --    2.18238   2.18949   2.19579   2.20150   2.21413
 Alpha virt. eigenvalues --    2.21641   2.23848   2.24058   2.24661   2.24956
 Alpha virt. eigenvalues --    2.26320   2.26513   2.26941   2.27837   2.28141
 Alpha virt. eigenvalues --    2.28420   2.28575   2.29703   2.29935   2.30015
 Alpha virt. eigenvalues --    2.31116   2.31870   2.32756   2.32962   2.33332
 Alpha virt. eigenvalues --    2.34229   2.34767   2.34928   2.35917   2.37025
 Alpha virt. eigenvalues --    2.37269   2.38120   2.38386   2.38468   2.38863
 Alpha virt. eigenvalues --    2.39423   2.40250   2.40818   2.40879   2.40942
 Alpha virt. eigenvalues --    2.41119   2.42277   2.42722   2.43499   2.44119
 Alpha virt. eigenvalues --    2.44220   2.44931   2.45264   2.45636   2.47081
 Alpha virt. eigenvalues --    2.47324   2.47554   2.48000   2.48837   2.49517
 Alpha virt. eigenvalues --    2.50269   2.50747   2.51653   2.52287   2.52851
 Alpha virt. eigenvalues --    2.53948   2.54118   2.54602   2.55082   2.55642
 Alpha virt. eigenvalues --    2.56605   2.57070   2.57322   2.57795   2.58005
 Alpha virt. eigenvalues --    2.58177   2.58297   2.58688   2.59432   2.59761
 Alpha virt. eigenvalues --    2.60160   2.60572   2.60843   2.61042   2.61952
 Alpha virt. eigenvalues --    2.62501   2.63423   2.64204   2.65267   2.65407
 Alpha virt. eigenvalues --    2.66362   2.68362   2.68882   2.69682   2.70930
 Alpha virt. eigenvalues --    2.71356   2.71619   2.72316   2.72458   2.72761
 Alpha virt. eigenvalues --    2.73546   2.73858   2.73967   2.74126   2.74627
 Alpha virt. eigenvalues --    2.74718   2.75144   2.76052   2.76200   2.77396
 Alpha virt. eigenvalues --    2.77988   2.79300   2.81124   2.81818   2.82664
 Alpha virt. eigenvalues --    2.86569   2.87258   2.87362   2.88063   2.89495
 Alpha virt. eigenvalues --    2.90979   2.91730   2.92489   2.94123   2.96900
 Alpha virt. eigenvalues --    2.97400   2.97951   2.99066   2.99876   3.00467
 Alpha virt. eigenvalues --    3.01720   3.05452   3.05984   3.06622   3.06883
 Alpha virt. eigenvalues --    3.08242   3.10703   3.11441   3.11603   3.14047
 Alpha virt. eigenvalues --    3.15121   3.17261   3.17780   3.18677   3.18806
 Alpha virt. eigenvalues --    3.19213   3.20438   3.22430   3.23732   3.23859
 Alpha virt. eigenvalues --    3.23909   3.30285   3.30663   3.30914   3.31612
 Alpha virt. eigenvalues --    3.35243   3.35641   3.37487   3.38156   3.46658
 Alpha virt. eigenvalues --    3.47225   3.47650   3.47746   3.48681   3.49836
 Alpha virt. eigenvalues --    3.50787   3.53890   3.54371   3.56057   3.57068
 Alpha virt. eigenvalues --    3.58117   3.58708   3.59522   3.60755   3.88003
 Alpha virt. eigenvalues --    3.88170   3.88714
  Beta  occ. eigenvalues --  -19.18299 -19.17422 -19.16595 -19.15602 -19.14525
  Beta  occ. eigenvalues --  -19.13192 -19.12856 -14.40942 -14.40073 -14.39887
  Beta  occ. eigenvalues --  -14.38484 -14.37838 -14.37372 -10.31338 -10.30115
  Beta  occ. eigenvalues --  -10.30091 -10.27535 -10.26243 -10.26067 -10.25525
  Beta  occ. eigenvalues --  -10.24206 -10.23810 -10.23786 -10.20848 -10.20623
  Beta  occ. eigenvalues --  -10.20422 -10.20054 -10.20001 -10.19734 -10.19710
  Beta  occ. eigenvalues --  -10.19675 -10.19644 -10.19539 -10.19393 -10.19383
  Beta  occ. eigenvalues --  -10.19116 -10.18811 -10.18607 -10.18413 -10.18337
  Beta  occ. eigenvalues --   -1.07559  -1.07027  -1.06487  -1.05828  -1.05681
  Beta  occ. eigenvalues --   -1.04062  -1.03313  -1.01613  -1.00979  -1.00206
  Beta  occ. eigenvalues --   -0.87344  -0.87281  -0.87228  -0.84971  -0.84817
  Beta  occ. eigenvalues --   -0.84773  -0.80664  -0.76939  -0.76881  -0.76460
  Beta  occ. eigenvalues --   -0.74694  -0.74574  -0.74445  -0.73846  -0.69151
  Beta  occ. eigenvalues --   -0.66407  -0.66273  -0.64236  -0.63465  -0.62790
  Beta  occ. eigenvalues --   -0.61696  -0.60828  -0.60671  -0.59812  -0.59619
  Beta  occ. eigenvalues --   -0.59074  -0.58382  -0.56165  -0.55431  -0.54723
  Beta  occ. eigenvalues --   -0.53330  -0.53143  -0.52691  -0.51267  -0.51247
  Beta  occ. eigenvalues --   -0.50614  -0.49637  -0.49212  -0.48714  -0.48368
  Beta  occ. eigenvalues --   -0.46737  -0.46456  -0.46085  -0.45894  -0.45599
  Beta  occ. eigenvalues --   -0.44749  -0.44568  -0.44414  -0.44315  -0.44005
  Beta  occ. eigenvalues --   -0.43511  -0.42898  -0.42680  -0.42636  -0.42599
  Beta  occ. eigenvalues --   -0.42206  -0.41559  -0.41211  -0.40683  -0.40433
  Beta  occ. eigenvalues --   -0.39882  -0.39475  -0.39410  -0.39146  -0.37224
  Beta  occ. eigenvalues --   -0.36862  -0.36701  -0.36547  -0.36322  -0.36060
  Beta  occ. eigenvalues --   -0.35596  -0.35382  -0.35233  -0.35047  -0.34471
  Beta  occ. eigenvalues --   -0.33978  -0.33895  -0.30863  -0.29745  -0.29289
  Beta  occ. eigenvalues --   -0.29157  -0.29070  -0.28715  -0.28524  -0.27843
  Beta  occ. eigenvalues --   -0.27181  -0.25610  -0.24439  -0.24377  -0.23980
  Beta  occ. eigenvalues --   -0.22326  -0.22148  -0.21675
  Beta virt. eigenvalues --   -0.05737  -0.05598  -0.05367  -0.00378  -0.00332
  Beta virt. eigenvalues --    0.00055   0.00385   0.01081   0.02351   0.04513
  Beta virt. eigenvalues --    0.04756   0.05433   0.08009   0.08493   0.08599
  Beta virt. eigenvalues --    0.09088   0.09303   0.09649   0.09805   0.10180
  Beta virt. eigenvalues --    0.11072   0.11988   0.12335   0.13046   0.14191
  Beta virt. eigenvalues --    0.14369   0.14901   0.15846   0.16173   0.16348
  Beta virt. eigenvalues --    0.16557   0.16610   0.16856   0.16997   0.17205
  Beta virt. eigenvalues --    0.17512   0.17693   0.18075   0.18335   0.18687
  Beta virt. eigenvalues --    0.19275   0.19655   0.20626   0.21145   0.21419
  Beta virt. eigenvalues --    0.21993   0.22657   0.24037   0.24713   0.24771
  Beta virt. eigenvalues --    0.24968   0.26021   0.26533   0.26882   0.27302
  Beta virt. eigenvalues --    0.29088   0.29302   0.29974   0.30363   0.31864
  Beta virt. eigenvalues --    0.32344   0.32732   0.32916   0.33305   0.33735
  Beta virt. eigenvalues --    0.34105   0.34333   0.35097   0.35382   0.37568
  Beta virt. eigenvalues --    0.38787   0.39123   0.39915   0.40329   0.40608
  Beta virt. eigenvalues --    0.41188   0.42255   0.48227   0.49114   0.49355
  Beta virt. eigenvalues --    0.49860   0.50169   0.50229   0.50315   0.50434
  Beta virt. eigenvalues --    0.50676   0.51176   0.51486   0.52162   0.53211
  Beta virt. eigenvalues --    0.53709   0.53827   0.53976   0.54142   0.54823
  Beta virt. eigenvalues --    0.55446   0.55618   0.55763   0.56023   0.56291
  Beta virt. eigenvalues --    0.57489   0.57609   0.58178   0.58490   0.58548
  Beta virt. eigenvalues --    0.58763   0.58833   0.58871   0.59058   0.59680
  Beta virt. eigenvalues --    0.60004   0.60153   0.60687   0.60709   0.60860
  Beta virt. eigenvalues --    0.60965   0.61428   0.61582   0.61665   0.61722
  Beta virt. eigenvalues --    0.61892   0.62190   0.62298   0.62510   0.62593
  Beta virt. eigenvalues --    0.62842   0.63582   0.63968   0.64720   0.64767
  Beta virt. eigenvalues --    0.64848   0.65106   0.65920   0.66071   0.67105
  Beta virt. eigenvalues --    0.67715   0.68312   0.68561   0.68983   0.69459
  Beta virt. eigenvalues --    0.70549   0.72147   0.72799   0.73368   0.74437
  Beta virt. eigenvalues --    0.75353   0.76686   0.76859   0.77469   0.77601
  Beta virt. eigenvalues --    0.77887   0.78471   0.78750   0.78965   0.79397
  Beta virt. eigenvalues --    0.80126   0.80770   0.80923   0.81342   0.81640
  Beta virt. eigenvalues --    0.81791   0.82032   0.82347   0.82544   0.82614
  Beta virt. eigenvalues --    0.83081   0.83507   0.83700   0.84151   0.84291
  Beta virt. eigenvalues --    0.84758   0.85112   0.85437   0.85839   0.86090
  Beta virt. eigenvalues --    0.87084   0.87306   0.87857   0.88457   0.88749
  Beta virt. eigenvalues --    0.89124   0.89296   0.89885   0.91345   0.91708
  Beta virt. eigenvalues --    0.93033   0.93283   0.94640   0.95158   0.95234
  Beta virt. eigenvalues --    0.95965   0.96413   0.96916   0.97068   0.98272
  Beta virt. eigenvalues --    0.99127   0.99553   1.00247   1.00840   1.01571
  Beta virt. eigenvalues --    1.01783   1.02849   1.03118   1.04202   1.04797
  Beta virt. eigenvalues --    1.05583   1.05991   1.06650   1.06973   1.07401
  Beta virt. eigenvalues --    1.08006   1.08176   1.09229   1.09346   1.10192
  Beta virt. eigenvalues --    1.10756   1.11297   1.11710   1.12014   1.12936
  Beta virt. eigenvalues --    1.13723   1.15418   1.16768   1.16916   1.17417
  Beta virt. eigenvalues --    1.18078   1.19785   1.20765   1.21818   1.22731
  Beta virt. eigenvalues --    1.22982   1.23306   1.23347   1.23826   1.23929
  Beta virt. eigenvalues --    1.24275   1.25921   1.26181   1.26704   1.27095
  Beta virt. eigenvalues --    1.27432   1.27714   1.28626   1.29073   1.29888
  Beta virt. eigenvalues --    1.30162   1.31242   1.32162   1.32700   1.33051
  Beta virt. eigenvalues --    1.33983   1.34244   1.34363   1.34707   1.35066
  Beta virt. eigenvalues --    1.36553   1.36954   1.37330   1.38021   1.38234
  Beta virt. eigenvalues --    1.38748   1.39210   1.39588   1.40403   1.40515
  Beta virt. eigenvalues --    1.40530   1.40980   1.41044   1.41130   1.41299
  Beta virt. eigenvalues --    1.41593   1.43152   1.44154   1.44665   1.44732
  Beta virt. eigenvalues --    1.46157   1.47829   1.48070   1.51470   1.51954
  Beta virt. eigenvalues --    1.53091   1.55016   1.56573   1.57321   1.58130
  Beta virt. eigenvalues --    1.58702   1.58879   1.59974   1.60440   1.61046
  Beta virt. eigenvalues --    1.61429   1.63035   1.64730   1.67256   1.68819
  Beta virt. eigenvalues --    1.69651   1.71522   1.71696   1.71829   1.73090
  Beta virt. eigenvalues --    1.73679   1.74175   1.74881   1.75214   1.75978
  Beta virt. eigenvalues --    1.76840   1.77090   1.77298   1.78182   1.78601
  Beta virt. eigenvalues --    1.78929   1.79282   1.79535   1.79645   1.80251
  Beta virt. eigenvalues --    1.80567   1.80761   1.81373   1.82247   1.82560
  Beta virt. eigenvalues --    1.83015   1.83981   1.85515   1.85790   1.86038
  Beta virt. eigenvalues --    1.86542   1.86943   1.87669   1.88049   1.88442
  Beta virt. eigenvalues --    1.89575   1.89929   1.90385   1.90958   1.91793
  Beta virt. eigenvalues --    1.91917   1.92230   1.92521   1.92794   1.93407
  Beta virt. eigenvalues --    1.93711   1.94401   1.94457   1.95316   1.96106
  Beta virt. eigenvalues --    1.97466   1.97501   1.98230   1.98938   1.99243
  Beta virt. eigenvalues --    1.99282   1.99418   2.00179   2.00932   2.01355
  Beta virt. eigenvalues --    2.01935   2.02834   2.03759   2.04309   2.04487
  Beta virt. eigenvalues --    2.05013   2.05388   2.05448   2.06516   2.07389
  Beta virt. eigenvalues --    2.08267   2.08886   2.09874   2.10917   2.12334
  Beta virt. eigenvalues --    2.13551   2.13970   2.14242   2.15536   2.15885
  Beta virt. eigenvalues --    2.18238   2.18949   2.19579   2.20150   2.21413
  Beta virt. eigenvalues --    2.21641   2.23848   2.24058   2.24661   2.24956
  Beta virt. eigenvalues --    2.26320   2.26513   2.26941   2.27837   2.28141
  Beta virt. eigenvalues --    2.28420   2.28575   2.29703   2.29935   2.30015
  Beta virt. eigenvalues --    2.31116   2.31870   2.32756   2.32962   2.33332
  Beta virt. eigenvalues --    2.34229   2.34767   2.34928   2.35917   2.37025
  Beta virt. eigenvalues --    2.37269   2.38120   2.38386   2.38468   2.38863
  Beta virt. eigenvalues --    2.39423   2.40250   2.40818   2.40879   2.40942
  Beta virt. eigenvalues --    2.41119   2.42277   2.42722   2.43499   2.44119
  Beta virt. eigenvalues --    2.44220   2.44931   2.45264   2.45636   2.47081
  Beta virt. eigenvalues --    2.47324   2.47554   2.48000   2.48837   2.49517
  Beta virt. eigenvalues --    2.50269   2.50747   2.51653   2.52287   2.52851
  Beta virt. eigenvalues --    2.53948   2.54118   2.54602   2.55082   2.55642
  Beta virt. eigenvalues --    2.56605   2.57070   2.57322   2.57795   2.58005
  Beta virt. eigenvalues --    2.58177   2.58297   2.58688   2.59432   2.59761
  Beta virt. eigenvalues --    2.60160   2.60572   2.60843   2.61042   2.61952
  Beta virt. eigenvalues --    2.62501   2.63423   2.64204   2.65267   2.65407
  Beta virt. eigenvalues --    2.66362   2.68362   2.68882   2.69682   2.70930
  Beta virt. eigenvalues --    2.71356   2.71619   2.72316   2.72458   2.72761
  Beta virt. eigenvalues --    2.73546   2.73858   2.73967   2.74126   2.74627
  Beta virt. eigenvalues --    2.74718   2.75144   2.76052   2.76200   2.77396
  Beta virt. eigenvalues --    2.77988   2.79300   2.81124   2.81818   2.82664
  Beta virt. eigenvalues --    2.86569   2.87258   2.87362   2.88063   2.89495
  Beta virt. eigenvalues --    2.90979   2.91730   2.92489   2.94123   2.96900
  Beta virt. eigenvalues --    2.97400   2.97951   2.99066   2.99876   3.00467
  Beta virt. eigenvalues --    3.01720   3.05452   3.05984   3.06622   3.06883
  Beta virt. eigenvalues --    3.08242   3.10703   3.11441   3.11603   3.14047
  Beta virt. eigenvalues --    3.15121   3.17261   3.17780   3.18677   3.18806
  Beta virt. eigenvalues --    3.19213   3.20438   3.22430   3.23732   3.23859
  Beta virt. eigenvalues --    3.23909   3.30285   3.30663   3.30914   3.31612
  Beta virt. eigenvalues --    3.35243   3.35641   3.37487   3.38156   3.46658
  Beta virt. eigenvalues --    3.47225   3.47650   3.47746   3.48681   3.49836
  Beta virt. eigenvalues --    3.50787   3.53890   3.54371   3.56057   3.57068
  Beta virt. eigenvalues --    3.58117   3.58708   3.59522   3.60755   3.88003
  Beta virt. eigenvalues --    3.88170   3.88714
          Condensed to atoms (all electrons):
 Mulliken atomic charges:
              1
     1  O   -0.602936
     2  C    0.201597
     3  C    0.519654
     4  C   -0.279030
     5  C   -0.251843
     6  O   -0.509118
     7  C    0.550532
     8  C    0.511097
     9  O   -0.486646
    10  O   -0.533602
    11  N   -0.332847
    12  N   -0.358414
    13  N   -0.231216
    14  C    0.040345
    15  C    0.098834
    16  C   -0.151041
    17  C   -0.105437
    18  C   -0.094250
    19  C   -0.141058
    20  C    0.262696
    21  N   -0.223650
    22  C    0.049248
    23  C    0.089694
    24  C    0.268788
    25  C   -0.150914
    26  C   -0.092809
    27  C   -0.110731
    28  C   -0.150237
    29  O   -0.518788
    30  N   -0.353945
    31  N   -0.307245
    32  C    0.112030
    33  C    0.041847
    34  C   -0.144987
    35  C   -0.116201
    36  C   -0.094698
    37  C   -0.128427
    38  C    0.278680
    39  O   -0.555972
    40  H    0.348937
    41  H    0.166423
    42  H    0.168451
    43  H    0.145886
    44  H    0.144476
    45  H    0.287725
    46  H    0.294582
    47  H    0.110974
    48  H    0.108890
    49  H    0.114964
    50  H    0.115978
    51  H    0.113005
    52  H    0.114052
    53  H    0.113645
    54  H    0.106706
    55  H    0.112108
    56  H    0.344676
    57  H    0.292907
    58  H    0.125899
    59  H    0.110245
    60  H    0.103170
    61  H    0.107969
    62  H    0.103370
    63  H    0.348829
    64  O   -0.554322
    65  H    0.338507
    66  H    0.112946
 Sum of Mulliken atomic charges =   0.00000
 Mulliken charges with hydrogens summed into heavy atoms:
              1
     1  O   -0.253998
     2  C    0.201597
     3  C    0.519654
     4  C    0.055844
     5  C    0.038519
     6  O   -0.509118
     7  C    0.550532
     8  C    0.511097
     9  O   -0.486646
    10  O   -0.533602
    11  N   -0.045122
    12  N   -0.063832
    13  N   -0.231216
    14  C    0.151320
    15  C    0.098834
    16  C   -0.038095
    17  C    0.003453
    18  C    0.020714
    19  C   -0.025080
    20  C    0.262696
    21  N   -0.223650
    22  C    0.162253
    23  C    0.089694
    24  C    0.268788
    25  C   -0.036863
    26  C    0.020835
    27  C   -0.004026
    28  C   -0.038128
    29  O   -0.174112
    30  N   -0.061039
    31  N   -0.307245
    32  C    0.237929
    33  C    0.041847
    34  C   -0.034742
    35  C   -0.013031
    36  C    0.013271
    37  C   -0.025056
    38  C    0.278680
    39  O   -0.207142
    64  O   -0.215815
 Sum of Mulliken charges with hydrogens summed into heavy atoms =   0.00000
          Atomic-Atomic Spin Densities.
              1          2          3          4          5          6
     1  O    0.000000   0.000000   0.000000   0.000000   0.000000   0.000000
     2  C    0.000000   0.000000   0.000000   0.000000   0.000000   0.000000
     3  C    0.000000   0.000000   0.000000   0.000000   0.000000   0.000000
     4  C    0.000000   0.000000   0.000000   0.000000   0.000000   0.000000
     5  C    0.000000   0.000000   0.000000   0.000000   0.000000   0.000000
     6  O    0.000000   0.000000   0.000000   0.000000   0.000000   0.000000
     7  C    0.000000   0.000000   0.000000   0.000000   0.000000   0.000000
     8  C    0.000000   0.000000   0.000000   0.000000   0.000000   0.000000
     9  O    0.000000   0.000000   0.000000   0.000000   0.000000   0.000000
    10  O    0.000000   0.000000   0.000000   0.000000   0.000000   0.000000
    11  N    0.000000   0.000000   0.000000   0.000000   0.000000   0.000000
    12  N    0.000000   0.000000   0.000000   0.000000   0.000000   0.000000
    13  N    0.000000   0.000000   0.000000   0.000000   0.000000   0.000000
    14  C    0.000000   0.000000   0.000000   0.000000   0.000000   0.000000
    15  C    0.000000   0.000000   0.000000   0.000000   0.000000   0.000000
    16  C    0.000000   0.000000   0.000000   0.000000   0.000000   0.000000
    17  C    0.000000   0.000000   0.000000   0.000000   0.000000   0.000000
    18  C    0.000000   0.000000   0.000000   0.000000   0.000000   0.000000
    19  C    0.000000   0.000000   0.000000   0.000000   0.000000   0.000000
    20  C    0.000000   0.000000   0.000000   0.000000   0.000000   0.000000
    21  N    0.000000   0.000000   0.000000   0.000000   0.000000   0.000000
    22  C    0.000000   0.000000   0.000000   0.000000   0.000000   0.000000
    23  C    0.000000   0.000000   0.000000   0.000000   0.000000   0.000000
    24  C    0.000000   0.000000   0.000000   0.000000   0.000000   0.000000
    25  C    0.000000   0.000000   0.000000   0.000000   0.000000   0.000000
    26  C    0.000000   0.000000   0.000000   0.000000   0.000000   0.000000
    27  C    0.000000   0.000000   0.000000   0.000000   0.000000   0.000000
    28  C    0.000000   0.000000   0.000000   0.000000   0.000000   0.000000
    29  O    0.000000   0.000000   0.000000   0.000000   0.000000   0.000000
    30  N    0.000000   0.000000   0.000000   0.000000   0.000000   0.000000
    31  N    0.000000   0.000000   0.000000   0.000000   0.000000   0.000000
    32  C    0.000000   0.000000   0.000000   0.000000   0.000000   0.000000
    33  C    0.000000   0.000000   0.000000   0.000000   0.000000   0.000000
    34  C    0.000000   0.000000   0.000000   0.000000   0.000000   0.000000
    35  C    0.000000   0.000000   0.000000   0.000000   0.000000   0.000000
    36  C    0.000000   0.000000   0.000000   0.000000   0.000000   0.000000
    37  C    0.000000   0.000000   0.000000   0.000000   0.000000   0.000000
    38  C    0.000000   0.000000   0.000000   0.000000   0.000000   0.000000
    39  O    0.000000   0.000000   0.000000   0.000000   0.000000   0.000000
    40  H    0.000000   0.000000   0.000000   0.000000   0.000000   0.000000
    41  H    0.000000   0.000000   0.000000   0.000000   0.000000   0.000000
    42  H    0.000000   0.000000   0.000000   0.000000   0.000000   0.000000
    43  H    0.000000   0.000000   0.000000   0.000000   0.000000   0.000000
    44  H    0.000000   0.000000   0.000000   0.000000   0.000000   0.000000
    45  H    0.000000   0.000000   0.000000   0.000000   0.000000   0.000000
    46  H    0.000000   0.000000   0.000000   0.000000   0.000000   0.000000
    47  H    0.000000   0.000000   0.000000   0.000000   0.000000   0.000000
    48  H    0.000000   0.000000   0.000000   0.000000   0.000000   0.000000
    49  H    0.000000   0.000000   0.000000   0.000000   0.000000   0.000000
    50  H    0.000000   0.000000   0.000000   0.000000   0.000000   0.000000
    51  H    0.000000   0.000000   0.000000   0.000000   0.000000   0.000000
    52  H    0.000000   0.000000   0.000000   0.000000   0.000000   0.000000
    53  H    0.000000   0.000000   0.000000   0.000000   0.000000   0.000000
    54  H    0.000000   0.000000   0.000000   0.000000   0.000000   0.000000
    55  H    0.000000   0.000000   0.000000   0.000000   0.000000   0.000000
    56  H    0.000000   0.000000   0.000000   0.000000   0.000000   0.000000
    57  H    0.000000   0.000000   0.000000   0.000000   0.000000   0.000000
    58  H    0.000000   0.000000   0.000000   0.000000   0.000000   0.000000
    59  H    0.000000   0.000000   0.000000   0.000000   0.000000   0.000000
    60  H    0.000000   0.000000   0.000000   0.000000   0.000000   0.000000
    61  H    0.000000   0.000000   0.000000   0.000000   0.000000   0.000000
    62  H    0.000000   0.000000   0.000000   0.000000   0.000000   0.000000
    63  H    0.000000   0.000000   0.000000   0.000000   0.000000   0.000000
    64  O    0.000000   0.000000   0.000000   0.000000   0.000000   0.000000
    65  H    0.000000   0.000000   0.000000   0.000000   0.000000   0.000000
    66  H    0.000000   0.000000   0.000000   0.000000   0.000000   0.000000
              7          8          9         10         11         12
     1  O    0.000000   0.000000   0.000000   0.000000   0.000000   0.000000
     2  C    0.000000   0.000000   0.000000   0.000000   0.000000   0.000000
     3  C    0.000000   0.000000   0.000000   0.000000   0.000000   0.000000
     4  C    0.000000   0.000000   0.000000   0.000000   0.000000   0.000000
     5  C    0.000000   0.000000   0.000000   0.000000   0.000000   0.000000
     6  O    0.000000   0.000000   0.000000   0.000000   0.000000   0.000000
     7  C    0.000000   0.000000   0.000000   0.000000   0.000000   0.000000
     8  C    0.000000   0.000000   0.000000   0.000000   0.000000   0.000000
     9  O    0.000000   0.000000   0.000000   0.000000   0.000000   0.000000
    10  O    0.000000   0.000000   0.000000   0.000000   0.000000   0.000000
    11  N    0.000000   0.000000   0.000000   0.000000   0.000000   0.000000
    12  N    0.000000   0.000000   0.000000   0.000000   0.000000   0.000000
    13  N    0.000000   0.000000   0.000000   0.000000   0.000000   0.000000
    14  C    0.000000   0.000000   0.000000   0.000000   0.000000   0.000000
    15  C    0.000000   0.000000   0.000000   0.000000   0.000000   0.000000
    16  C    0.000000   0.000000   0.000000   0.000000   0.000000   0.000000
    17  C    0.000000   0.000000   0.000000   0.000000   0.000000   0.000000
    18  C    0.000000   0.000000   0.000000   0.000000   0.000000   0.000000
    19  C    0.000000   0.000000   0.000000   0.000000   0.000000   0.000000
    20  C    0.000000   0.000000   0.000000   0.000000   0.000000   0.000000
    21  N    0.000000   0.000000   0.000000   0.000000   0.000000   0.000000
    22  C    0.000000   0.000000   0.000000   0.000000   0.000000   0.000000
    23  C    0.000000   0.000000   0.000000   0.000000   0.000000   0.000000
    24  C    0.000000   0.000000   0.000000   0.000000   0.000000   0.000000
    25  C    0.000000   0.000000   0.000000   0.000000   0.000000   0.000000
    26  C    0.000000   0.000000   0.000000   0.000000   0.000000   0.000000
    27  C    0.000000   0.000000   0.000000   0.000000   0.000000   0.000000
    28  C    0.000000   0.000000   0.000000   0.000000   0.000000   0.000000
    29  O    0.000000   0.000000   0.000000   0.000000   0.000000   0.000000
    30  N    0.000000   0.000000   0.000000   0.000000   0.000000   0.000000
    31  N    0.000000   0.000000   0.000000   0.000000   0.000000   0.000000
    32  C    0.000000   0.000000   0.000000   0.000000   0.000000   0.000000
    33  C    0.000000   0.000000   0.000000   0.000000   0.000000   0.000000
    34  C    0.000000   0.000000   0.000000   0.000000   0.000000   0.000000
    35  C    0.000000   0.000000   0.000000   0.000000   0.000000   0.000000
    36  C    0.000000   0.000000   0.000000   0.000000   0.000000   0.000000
    37  C    0.000000   0.000000   0.000000   0.000000   0.000000   0.000000
    38  C    0.000000   0.000000   0.000000   0.000000   0.000000   0.000000
    39  O    0.000000   0.000000   0.000000   0.000000   0.000000   0.000000
    40  H    0.000000   0.000000   0.000000   0.000000   0.000000   0.000000
    41  H    0.000000   0.000000   0.000000   0.000000   0.000000   0.000000
    42  H    0.000000   0.000000   0.000000   0.000000   0.000000   0.000000
    43  H    0.000000   0.000000   0.000000   0.000000   0.000000   0.000000
    44  H    0.000000   0.000000   0.000000   0.000000   0.000000   0.000000
    45  H    0.000000   0.000000   0.000000   0.000000   0.000000   0.000000
    46  H    0.000000   0.000000   0.000000   0.000000   0.000000   0.000000
    47  H    0.000000   0.000000   0.000000   0.000000   0.000000   0.000000
    48  H    0.000000   0.000000   0.000000   0.000000   0.000000   0.000000
    49  H    0.000000   0.000000   0.000000   0.000000   0.000000   0.000000
    50  H    0.000000   0.000000   0.000000   0.000000   0.000000   0.000000
    51  H    0.000000   0.000000   0.000000   0.000000   0.000000   0.000000
    52  H    0.000000   0.000000   0.000000   0.000000   0.000000   0.000000
    53  H    0.000000   0.000000   0.000000   0.000000   0.000000   0.000000
    54  H    0.000000   0.000000   0.000000   0.000000   0.000000   0.000000
    55  H    0.000000   0.000000   0.000000   0.000000   0.000000   0.000000
    56  H    0.000000   0.000000   0.000000   0.000000   0.000000   0.000000
    57  H    0.000000   0.000000   0.000000   0.000000   0.000000   0.000000
    58  H    0.000000   0.000000   0.000000   0.000000   0.000000   0.000000
    59  H    0.000000   0.000000   0.000000   0.000000   0.000000   0.000000
    60  H    0.000000   0.000000   0.000000   0.000000   0.000000   0.000000
    61  H    0.000000   0.000000   0.000000   0.000000   0.000000   0.000000
    62  H    0.000000   0.000000   0.000000   0.000000   0.000000   0.000000
    63  H    0.000000   0.000000   0.000000   0.000000   0.000000   0.000000
    64  O    0.000000   0.000000   0.000000   0.000000   0.000000   0.000000
    65  H    0.000000   0.000000   0.000000   0.000000   0.000000   0.000000
    66  H    0.000000   0.000000   0.000000   0.000000   0.000000   0.000000
             13         14         15         16         17         18
     1  O    0.000000   0.000000   0.000000   0.000000   0.000000   0.000000
     2  C    0.000000   0.000000   0.000000   0.000000   0.000000   0.000000
     3  C    0.000000   0.000000   0.000000   0.000000   0.000000   0.000000
     4  C    0.000000   0.000000   0.000000   0.000000   0.000000   0.000000
     5  C    0.000000   0.000000   0.000000   0.000000   0.000000   0.000000
     6  O    0.000000   0.000000   0.000000   0.000000   0.000000   0.000000
     7  C    0.000000   0.000000   0.000000   0.000000   0.000000   0.000000
     8  C    0.000000   0.000000   0.000000   0.000000   0.000000   0.000000
     9  O    0.000000   0.000000   0.000000   0.000000   0.000000   0.000000
    10  O    0.000000   0.000000   0.000000   0.000000   0.000000   0.000000
    11  N    0.000000   0.000000   0.000000   0.000000   0.000000   0.000000
    12  N    0.000000   0.000000   0.000000   0.000000   0.000000   0.000000
    13  N    0.000000   0.000000   0.000000   0.000000   0.000000   0.000000
    14  C    0.000000   0.000000   0.000000   0.000000   0.000000   0.000000
    15  C    0.000000   0.000000   0.000000   0.000000   0.000000   0.000000
    16  C    0.000000   0.000000   0.000000   0.000000   0.000000   0.000000
    17  C    0.000000   0.000000   0.000000   0.000000   0.000000   0.000000
    18  C    0.000000   0.000000   0.000000   0.000000   0.000000   0.000000
    19  C    0.000000   0.000000   0.000000   0.000000   0.000000   0.000000
    20  C    0.000000   0.000000   0.000000   0.000000   0.000000   0.000000
    21  N    0.000000   0.000000   0.000000   0.000000   0.000000   0.000000
    22  C    0.000000   0.000000   0.000000   0.000000   0.000000   0.000000
    23  C    0.000000   0.000000   0.000000   0.000000   0.000000   0.000000
    24  C    0.000000   0.000000   0.000000   0.000000   0.000000   0.000000
    25  C    0.000000   0.000000   0.000000   0.000000   0.000000   0.000000
    26  C    0.000000   0.000000   0.000000   0.000000   0.000000   0.000000
    27  C    0.000000   0.000000   0.000000   0.000000   0.000000   0.000000
    28  C    0.000000   0.000000   0.000000   0.000000   0.000000   0.000000
    29  O    0.000000   0.000000   0.000000   0.000000   0.000000   0.000000
    30  N    0.000000   0.000000   0.000000   0.000000   0.000000   0.000000
    31  N    0.000000   0.000000   0.000000   0.000000   0.000000   0.000000
    32  C    0.000000   0.000000   0.000000   0.000000   0.000000   0.000000
    33  C    0.000000   0.000000   0.000000   0.000000   0.000000   0.000000
    34  C    0.000000   0.000000   0.000000   0.000000   0.000000   0.000000
    35  C    0.000000   0.000000   0.000000   0.000000   0.000000   0.000000
    36  C    0.000000   0.000000   0.000000   0.000000   0.000000   0.000000
    37  C    0.000000   0.000000   0.000000   0.000000   0.000000   0.000000
    38  C    0.000000   0.000000   0.000000   0.000000   0.000000   0.000000
    39  O    0.000000   0.000000   0.000000   0.000000   0.000000   0.000000
    40  H    0.000000   0.000000   0.000000   0.000000   0.000000   0.000000
    41  H    0.000000   0.000000   0.000000   0.000000   0.000000   0.000000
    42  H    0.000000   0.000000   0.000000   0.000000   0.000000   0.000000
    43  H    0.000000   0.000000   0.000000   0.000000   0.000000   0.000000
    44  H    0.000000   0.000000   0.000000   0.000000   0.000000   0.000000
    45  H    0.000000   0.000000   0.000000   0.000000   0.000000   0.000000
    46  H    0.000000   0.000000   0.000000   0.000000   0.000000   0.000000
    47  H    0.000000   0.000000   0.000000   0.000000   0.000000   0.000000
    48  H    0.000000   0.000000   0.000000   0.000000   0.000000   0.000000
    49  H    0.000000   0.000000   0.000000   0.000000   0.000000   0.000000
    50  H    0.000000   0.000000   0.000000   0.000000   0.000000   0.000000
    51  H    0.000000   0.000000   0.000000   0.000000   0.000000   0.000000
    52  H    0.000000   0.000000   0.000000   0.000000   0.000000   0.000000
    53  H    0.000000   0.000000   0.000000   0.000000   0.000000   0.000000
    54  H    0.000000   0.000000   0.000000   0.000000   0.000000   0.000000
    55  H    0.000000   0.000000   0.000000   0.000000   0.000000   0.000000
    56  H    0.000000   0.000000   0.000000   0.000000   0.000000   0.000000
    57  H    0.000000   0.000000   0.000000   0.000000   0.000000   0.000000
    58  H    0.000000   0.000000   0.000000   0.000000   0.000000   0.000000
    59  H    0.000000   0.000000   0.000000   0.000000   0.000000   0.000000
    60  H    0.000000   0.000000   0.000000   0.000000   0.000000   0.000000
    61  H    0.000000   0.000000   0.000000   0.000000   0.000000   0.000000
    62  H    0.000000   0.000000   0.000000   0.000000   0.000000   0.000000
    63  H    0.000000   0.000000   0.000000   0.000000   0.000000   0.000000
    64  O    0.000000   0.000000   0.000000   0.000000   0.000000   0.000000
    65  H    0.000000   0.000000   0.000000   0.000000   0.000000   0.000000
    66  H    0.000000   0.000000   0.000000   0.000000   0.000000   0.000000
             19         20         21         22         23         24
     1  O    0.000000   0.000000   0.000000   0.000000   0.000000   0.000000
     2  C    0.000000   0.000000   0.000000   0.000000   0.000000   0.000000
     3  C    0.000000   0.000000   0.000000   0.000000   0.000000   0.000000
     4  C    0.000000   0.000000   0.000000   0.000000   0.000000   0.000000
     5  C    0.000000   0.000000   0.000000   0.000000   0.000000   0.000000
     6  O    0.000000   0.000000   0.000000   0.000000   0.000000   0.000000
     7  C    0.000000   0.000000   0.000000   0.000000   0.000000   0.000000
     8  C    0.000000   0.000000   0.000000   0.000000   0.000000   0.000000
     9  O    0.000000   0.000000   0.000000   0.000000   0.000000   0.000000
    10  O    0.000000   0.000000   0.000000   0.000000   0.000000   0.000000
    11  N    0.000000   0.000000   0.000000   0.000000   0.000000   0.000000
    12  N    0.000000   0.000000   0.000000   0.000000   0.000000   0.000000
    13  N    0.000000   0.000000   0.000000   0.000000   0.000000   0.000000
    14  C    0.000000   0.000000   0.000000   0.000000   0.000000   0.000000
    15  C    0.000000   0.000000   0.000000   0.000000   0.000000   0.000000
    16  C    0.000000   0.000000   0.000000   0.000000   0.000000   0.000000
    17  C    0.000000   0.000000   0.000000   0.000000   0.000000   0.000000
    18  C    0.000000   0.000000   0.000000   0.000000   0.000000   0.000000
    19  C    0.000000   0.000000   0.000000   0.000000   0.000000   0.000000
    20  C    0.000000   0.000000   0.000000   0.000000   0.000000   0.000000
    21  N    0.000000   0.000000   0.000000   0.000000   0.000000   0.000000
    22  C    0.000000   0.000000   0.000000   0.000000   0.000000   0.000000
    23  C    0.000000   0.000000   0.000000   0.000000   0.000000   0.000000
    24  C    0.000000   0.000000   0.000000   0.000000   0.000000   0.000000
    25  C    0.000000   0.000000   0.000000   0.000000   0.000000   0.000000
    26  C    0.000000   0.000000   0.000000   0.000000   0.000000   0.000000
    27  C    0.000000   0.000000   0.000000   0.000000   0.000000   0.000000
    28  C    0.000000   0.000000   0.000000   0.000000   0.000000   0.000000
    29  O    0.000000   0.000000   0.000000   0.000000   0.000000   0.000000
    30  N    0.000000   0.000000   0.000000   0.000000   0.000000   0.000000
    31  N    0.000000   0.000000   0.000000   0.000000   0.000000   0.000000
    32  C    0.000000   0.000000   0.000000   0.000000   0.000000   0.000000
    33  C    0.000000   0.000000   0.000000   0.000000   0.000000   0.000000
    34  C    0.000000   0.000000   0.000000   0.000000   0.000000   0.000000
    35  C    0.000000   0.000000   0.000000   0.000000   0.000000   0.000000
    36  C    0.000000   0.000000   0.000000   0.000000   0.000000   0.000000
    37  C    0.000000   0.000000   0.000000   0.000000   0.000000   0.000000
    38  C    0.000000   0.000000   0.000000   0.000000   0.000000   0.000000
    39  O    0.000000   0.000000   0.000000   0.000000   0.000000   0.000000
    40  H    0.000000   0.000000   0.000000   0.000000   0.000000   0.000000
    41  H    0.000000   0.000000   0.000000   0.000000   0.000000   0.000000
    42  H    0.000000   0.000000   0.000000   0.000000   0.000000   0.000000
    43  H    0.000000   0.000000   0.000000   0.000000   0.000000   0.000000
    44  H    0.000000   0.000000   0.000000   0.000000   0.000000   0.000000
    45  H    0.000000   0.000000   0.000000   0.000000   0.000000   0.000000
    46  H    0.000000   0.000000   0.000000   0.000000   0.000000   0.000000
    47  H    0.000000   0.000000   0.000000   0.000000   0.000000   0.000000
    48  H    0.000000   0.000000   0.000000   0.000000   0.000000   0.000000
    49  H    0.000000   0.000000   0.000000   0.000000   0.000000   0.000000
    50  H    0.000000   0.000000   0.000000   0.000000   0.000000   0.000000
    51  H    0.000000   0.000000   0.000000   0.000000   0.000000   0.000000
    52  H    0.000000   0.000000   0.000000   0.000000   0.000000   0.000000
    53  H    0.000000   0.000000   0.000000   0.000000   0.000000   0.000000
    54  H    0.000000   0.000000   0.000000   0.000000   0.000000   0.000000
    55  H    0.000000   0.000000   0.000000   0.000000   0.000000   0.000000
    56  H    0.000000   0.000000   0.000000   0.000000   0.000000   0.000000
    57  H    0.000000   0.000000   0.000000   0.000000   0.000000   0.000000
    58  H    0.000000   0.000000   0.000000   0.000000   0.000000   0.000000
    59  H    0.000000   0.000000   0.000000   0.000000   0.000000   0.000000
    60  H    0.000000   0.000000   0.000000   0.000000   0.000000   0.000000
    61  H    0.000000   0.000000   0.000000   0.000000   0.000000   0.000000
    62  H    0.000000   0.000000   0.000000   0.000000   0.000000   0.000000
    63  H    0.000000   0.000000   0.000000   0.000000   0.000000   0.000000
    64  O    0.000000   0.000000   0.000000   0.000000   0.000000   0.000000
    65  H    0.000000   0.000000   0.000000   0.000000   0.000000   0.000000
    66  H    0.000000   0.000000   0.000000   0.000000   0.000000   0.000000
             25         26         27         28         29         30
     1  O    0.000000   0.000000   0.000000   0.000000   0.000000   0.000000
     2  C    0.000000   0.000000   0.000000   0.000000   0.000000   0.000000
     3  C    0.000000   0.000000   0.000000   0.000000   0.000000   0.000000
     4  C    0.000000   0.000000   0.000000   0.000000   0.000000   0.000000
     5  C    0.000000   0.000000   0.000000   0.000000   0.000000   0.000000
     6  O    0.000000   0.000000   0.000000   0.000000   0.000000   0.000000
     7  C    0.000000   0.000000   0.000000   0.000000   0.000000   0.000000
     8  C    0.000000   0.000000   0.000000   0.000000   0.000000   0.000000
     9  O    0.000000   0.000000   0.000000   0.000000   0.000000   0.000000
    10  O    0.000000   0.000000   0.000000   0.000000   0.000000   0.000000
    11  N    0.000000   0.000000   0.000000   0.000000   0.000000   0.000000
    12  N    0.000000   0.000000   0.000000   0.000000   0.000000   0.000000
    13  N    0.000000   0.000000   0.000000   0.000000   0.000000   0.000000
    14  C    0.000000   0.000000   0.000000   0.000000   0.000000   0.000000
    15  C    0.000000   0.000000   0.000000   0.000000   0.000000   0.000000
    16  C    0.000000   0.000000   0.000000   0.000000   0.000000   0.000000
    17  C    0.000000   0.000000   0.000000   0.000000   0.000000   0.000000
    18  C    0.000000   0.000000   0.000000   0.000000   0.000000   0.000000
    19  C    0.000000   0.000000   0.000000   0.000000   0.000000   0.000000
    20  C    0.000000   0.000000   0.000000   0.000000   0.000000   0.000000
    21  N    0.000000   0.000000   0.000000   0.000000   0.000000   0.000000
    22  C    0.000000   0.000000   0.000000   0.000000   0.000000   0.000000
    23  C    0.000000   0.000000   0.000000   0.000000   0.000000   0.000000
    24  C    0.000000   0.000000   0.000000   0.000000   0.000000   0.000000
    25  C    0.000000   0.000000   0.000000   0.000000   0.000000   0.000000
    26  C    0.000000   0.000000   0.000000   0.000000   0.000000   0.000000
    27  C    0.000000   0.000000   0.000000   0.000000   0.000000   0.000000
    28  C    0.000000   0.000000   0.000000   0.000000   0.000000   0.000000
    29  O    0.000000   0.000000   0.000000   0.000000   0.000000   0.000000
    30  N    0.000000   0.000000   0.000000   0.000000   0.000000   0.000000
    31  N    0.000000   0.000000   0.000000   0.000000   0.000000   0.000000
    32  C    0.000000   0.000000   0.000000   0.000000   0.000000   0.000000
    33  C    0.000000   0.000000   0.000000   0.000000   0.000000   0.000000
    34  C    0.000000   0.000000   0.000000   0.000000   0.000000   0.000000
    35  C    0.000000   0.000000   0.000000   0.000000   0.000000   0.000000
    36  C    0.000000   0.000000   0.000000   0.000000   0.000000   0.000000
    37  C    0.000000   0.000000   0.000000   0.000000   0.000000   0.000000
    38  C    0.000000   0.000000   0.000000   0.000000   0.000000   0.000000
    39  O    0.000000   0.000000   0.000000   0.000000   0.000000   0.000000
    40  H    0.000000   0.000000   0.000000   0.000000   0.000000   0.000000
    41  H    0.000000   0.000000   0.000000   0.000000   0.000000   0.000000
    42  H    0.000000   0.000000   0.000000   0.000000   0.000000   0.000000
    43  H    0.000000   0.000000   0.000000   0.000000   0.000000   0.000000
    44  H    0.000000   0.000000   0.000000   0.000000   0.000000   0.000000
    45  H    0.000000   0.000000   0.000000   0.000000   0.000000   0.000000
    46  H    0.000000   0.000000   0.000000   0.000000   0.000000   0.000000
    47  H    0.000000   0.000000   0.000000   0.000000   0.000000   0.000000
    48  H    0.000000   0.000000   0.000000   0.000000   0.000000   0.000000
    49  H    0.000000   0.000000   0.000000   0.000000   0.000000   0.000000
    50  H    0.000000   0.000000   0.000000   0.000000   0.000000   0.000000
    51  H    0.000000   0.000000   0.000000   0.000000   0.000000   0.000000
    52  H    0.000000   0.000000   0.000000   0.000000   0.000000   0.000000
    53  H    0.000000   0.000000   0.000000   0.000000   0.000000   0.000000
    54  H    0.000000   0.000000   0.000000   0.000000   0.000000   0.000000
    55  H    0.000000   0.000000   0.000000   0.000000   0.000000   0.000000
    56  H    0.000000   0.000000   0.000000   0.000000   0.000000   0.000000
    57  H    0.000000   0.000000   0.000000   0.000000   0.000000   0.000000
    58  H    0.000000   0.000000   0.000000   0.000000   0.000000   0.000000
    59  H    0.000000   0.000000   0.000000   0.000000   0.000000   0.000000
    60  H    0.000000   0.000000   0.000000   0.000000   0.000000   0.000000
    61  H    0.000000   0.000000   0.000000   0.000000   0.000000   0.000000
    62  H    0.000000   0.000000   0.000000   0.000000   0.000000   0.000000
    63  H    0.000000   0.000000   0.000000   0.000000   0.000000   0.000000
    64  O    0.000000   0.000000   0.000000   0.000000   0.000000   0.000000
    65  H    0.000000   0.000000   0.000000   0.000000   0.000000   0.000000
    66  H    0.000000   0.000000   0.000000   0.000000   0.000000   0.000000
             31         32         33         34         35         36
     1  O    0.000000   0.000000   0.000000   0.000000   0.000000   0.000000
     2  C    0.000000   0.000000   0.000000   0.000000   0.000000   0.000000
     3  C    0.000000   0.000000   0.000000   0.000000   0.000000   0.000000
     4  C    0.000000   0.000000   0.000000   0.000000   0.000000   0.000000
     5  C    0.000000   0.000000   0.000000   0.000000   0.000000   0.000000
     6  O    0.000000   0.000000   0.000000   0.000000   0.000000   0.000000
     7  C    0.000000   0.000000   0.000000   0.000000   0.000000   0.000000
     8  C    0.000000   0.000000   0.000000   0.000000   0.000000   0.000000
     9  O    0.000000   0.000000   0.000000   0.000000   0.000000   0.000000
    10  O    0.000000   0.000000   0.000000   0.000000   0.000000   0.000000
    11  N    0.000000   0.000000   0.000000   0.000000   0.000000   0.000000
    12  N    0.000000   0.000000   0.000000   0.000000   0.000000   0.000000
    13  N    0.000000   0.000000   0.000000   0.000000   0.000000   0.000000
    14  C    0.000000   0.000000   0.000000   0.000000   0.000000   0.000000
    15  C    0.000000   0.000000   0.000000   0.000000   0.000000   0.000000
    16  C    0.000000   0.000000   0.000000   0.000000   0.000000   0.000000
    17  C    0.000000   0.000000   0.000000   0.000000   0.000000   0.000000
    18  C    0.000000   0.000000   0.000000   0.000000   0.000000   0.000000
    19  C    0.000000   0.000000   0.000000   0.000000   0.000000   0.000000
    20  C    0.000000   0.000000   0.000000   0.000000   0.000000   0.000000
    21  N    0.000000   0.000000   0.000000   0.000000   0.000000   0.000000
    22  C    0.000000   0.000000   0.000000   0.000000   0.000000   0.000000
    23  C    0.000000   0.000000   0.000000   0.000000   0.000000   0.000000
    24  C    0.000000   0.000000   0.000000   0.000000   0.000000   0.000000
    25  C    0.000000   0.000000   0.000000   0.000000   0.000000   0.000000
    26  C    0.000000   0.000000   0.000000   0.000000   0.000000   0.000000
    27  C    0.000000   0.000000   0.000000   0.000000   0.000000   0.000000
    28  C    0.000000   0.000000   0.000000   0.000000   0.000000   0.000000
    29  O    0.000000   0.000000   0.000000   0.000000   0.000000   0.000000
    30  N    0.000000   0.000000   0.000000   0.000000   0.000000   0.000000
    31  N    0.000000   0.000000   0.000000   0.000000   0.000000   0.000000
    32  C    0.000000   0.000000   0.000000   0.000000   0.000000   0.000000
    33  C    0.000000   0.000000   0.000000   0.000000   0.000000   0.000000
    34  C    0.000000   0.000000   0.000000   0.000000   0.000000   0.000000
    35  C    0.000000   0.000000   0.000000   0.000000   0.000000   0.000000
    36  C    0.000000   0.000000   0.000000   0.000000   0.000000   0.000000
    37  C    0.000000   0.000000   0.000000   0.000000   0.000000   0.000000
    38  C    0.000000   0.000000   0.000000   0.000000   0.000000   0.000000
    39  O    0.000000   0.000000   0.000000   0.000000   0.000000   0.000000
    40  H    0.000000   0.000000   0.000000   0.000000   0.000000   0.000000
    41  H    0.000000   0.000000   0.000000   0.000000   0.000000   0.000000
    42  H    0.000000   0.000000   0.000000   0.000000   0.000000   0.000000
    43  H    0.000000   0.000000   0.000000   0.000000   0.000000   0.000000
    44  H    0.000000   0.000000   0.000000   0.000000   0.000000   0.000000
    45  H    0.000000   0.000000   0.000000   0.000000   0.000000   0.000000
    46  H    0.000000   0.000000   0.000000   0.000000   0.000000   0.000000
    47  H    0.000000   0.000000   0.000000   0.000000   0.000000   0.000000
    48  H    0.000000   0.000000   0.000000   0.000000   0.000000   0.000000
    49  H    0.000000   0.000000   0.000000   0.000000   0.000000   0.000000
    50  H    0.000000   0.000000   0.000000   0.000000   0.000000   0.000000
    51  H    0.000000   0.000000   0.000000   0.000000   0.000000   0.000000
    52  H    0.000000   0.000000   0.000000   0.000000   0.000000   0.000000
    53  H    0.000000   0.000000   0.000000   0.000000   0.000000   0.000000
    54  H    0.000000   0.000000   0.000000   0.000000   0.000000   0.000000
    55  H    0.000000   0.000000   0.000000   0.000000   0.000000   0.000000
    56  H    0.000000   0.000000   0.000000   0.000000   0.000000   0.000000
    57  H    0.000000   0.000000   0.000000   0.000000   0.000000   0.000000
    58  H    0.000000   0.000000   0.000000   0.000000   0.000000   0.000000
    59  H    0.000000   0.000000   0.000000   0.000000   0.000000   0.000000
    60  H    0.000000   0.000000   0.000000   0.000000   0.000000   0.000000
    61  H    0.000000   0.000000   0.000000   0.000000   0.000000   0.000000
    62  H    0.000000   0.000000   0.000000   0.000000   0.000000   0.000000
    63  H    0.000000   0.000000   0.000000   0.000000   0.000000   0.000000
    64  O    0.000000   0.000000   0.000000   0.000000   0.000000   0.000000
    65  H    0.000000   0.000000   0.000000   0.000000   0.000000   0.000000
    66  H    0.000000   0.000000   0.000000   0.000000   0.000000   0.000000
             37         38         39         40         41         42
     1  O    0.000000   0.000000   0.000000   0.000000   0.000000   0.000000
     2  C    0.000000   0.000000   0.000000   0.000000   0.000000   0.000000
     3  C    0.000000   0.000000   0.000000   0.000000   0.000000   0.000000
     4  C    0.000000   0.000000   0.000000   0.000000   0.000000   0.000000
     5  C    0.000000   0.000000   0.000000   0.000000   0.000000   0.000000
     6  O    0.000000   0.000000   0.000000   0.000000   0.000000   0.000000
     7  C    0.000000   0.000000   0.000000   0.000000   0.000000   0.000000
     8  C    0.000000   0.000000   0.000000   0.000000   0.000000   0.000000
     9  O    0.000000   0.000000   0.000000   0.000000   0.000000   0.000000
    10  O    0.000000   0.000000   0.000000   0.000000   0.000000   0.000000
    11  N    0.000000   0.000000   0.000000   0.000000   0.000000   0.000000
    12  N    0.000000   0.000000   0.000000   0.000000   0.000000   0.000000
    13  N    0.000000   0.000000   0.000000   0.000000   0.000000   0.000000
    14  C    0.000000   0.000000   0.000000   0.000000   0.000000   0.000000
    15  C    0.000000   0.000000   0.000000   0.000000   0.000000   0.000000
    16  C    0.000000   0.000000   0.000000   0.000000   0.000000   0.000000
    17  C    0.000000   0.000000   0.000000   0.000000   0.000000   0.000000
    18  C    0.000000   0.000000   0.000000   0.000000   0.000000   0.000000
    19  C    0.000000   0.000000   0.000000   0.000000   0.000000   0.000000
    20  C    0.000000   0.000000   0.000000   0.000000   0.000000   0.000000
    21  N    0.000000   0.000000   0.000000   0.000000   0.000000   0.000000
    22  C    0.000000   0.000000   0.000000   0.000000   0.000000   0.000000
    23  C    0.000000   0.000000   0.000000   0.000000   0.000000   0.000000
    24  C    0.000000   0.000000   0.000000   0.000000   0.000000   0.000000
    25  C    0.000000   0.000000   0.000000   0.000000   0.000000   0.000000
    26  C    0.000000   0.000000   0.000000   0.000000   0.000000   0.000000
    27  C    0.000000   0.000000   0.000000   0.000000   0.000000   0.000000
    28  C    0.000000   0.000000   0.000000   0.000000   0.000000   0.000000
    29  O    0.000000   0.000000   0.000000   0.000000   0.000000   0.000000
    30  N    0.000000   0.000000   0.000000   0.000000   0.000000   0.000000
    31  N    0.000000   0.000000   0.000000   0.000000   0.000000   0.000000
    32  C    0.000000   0.000000   0.000000   0.000000   0.000000   0.000000
    33  C    0.000000   0.000000   0.000000   0.000000   0.000000   0.000000
    34  C    0.000000   0.000000   0.000000   0.000000   0.000000   0.000000
    35  C    0.000000   0.000000   0.000000   0.000000   0.000000   0.000000
    36  C    0.000000   0.000000   0.000000   0.000000   0.000000   0.000000
    37  C    0.000000   0.000000   0.000000   0.000000   0.000000   0.000000
    38  C    0.000000   0.000000   0.000000   0.000000   0.000000   0.000000
    39  O    0.000000   0.000000   0.000000   0.000000   0.000000   0.000000
    40  H    0.000000   0.000000   0.000000   0.000000   0.000000   0.000000
    41  H    0.000000   0.000000   0.000000   0.000000   0.000000   0.000000
    42  H    0.000000   0.000000   0.000000   0.000000   0.000000   0.000000
    43  H    0.000000   0.000000   0.000000   0.000000   0.000000   0.000000
    44  H    0.000000   0.000000   0.000000   0.000000   0.000000   0.000000
    45  H    0.000000   0.000000   0.000000   0.000000   0.000000   0.000000
    46  H    0.000000   0.000000   0.000000   0.000000   0.000000   0.000000
    47  H    0.000000   0.000000   0.000000   0.000000   0.000000   0.000000
    48  H    0.000000   0.000000   0.000000   0.000000   0.000000   0.000000
    49  H    0.000000   0.000000   0.000000   0.000000   0.000000   0.000000
    50  H    0.000000   0.000000   0.000000   0.000000   0.000000   0.000000
    51  H    0.000000   0.000000   0.000000   0.000000   0.000000   0.000000
    52  H    0.000000   0.000000   0.000000   0.000000   0.000000   0.000000
    53  H    0.000000   0.000000   0.000000   0.000000   0.000000   0.000000
    54  H    0.000000   0.000000   0.000000   0.000000   0.000000   0.000000
    55  H    0.000000   0.000000   0.000000   0.000000   0.000000   0.000000
    56  H    0.000000   0.000000   0.000000   0.000000   0.000000   0.000000
    57  H    0.000000   0.000000   0.000000   0.000000   0.000000   0.000000
    58  H    0.000000   0.000000   0.000000   0.000000   0.000000   0.000000
    59  H    0.000000   0.000000   0.000000   0.000000   0.000000   0.000000
    60  H    0.000000   0.000000   0.000000   0.000000   0.000000   0.000000
    61  H    0.000000   0.000000   0.000000   0.000000   0.000000   0.000000
    62  H    0.000000   0.000000   0.000000   0.000000   0.000000   0.000000
    63  H    0.000000   0.000000   0.000000   0.000000   0.000000   0.000000
    64  O    0.000000   0.000000   0.000000   0.000000   0.000000   0.000000
    65  H    0.000000   0.000000   0.000000   0.000000   0.000000   0.000000
    66  H    0.000000   0.000000   0.000000   0.000000   0.000000   0.000000
             43         44         45         46         47         48
     1  O    0.000000   0.000000   0.000000   0.000000   0.000000   0.000000
     2  C    0.000000   0.000000   0.000000   0.000000   0.000000   0.000000
     3  C    0.000000   0.000000   0.000000   0.000000   0.000000   0.000000
     4  C    0.000000   0.000000   0.000000   0.000000   0.000000   0.000000
     5  C    0.000000   0.000000   0.000000   0.000000   0.000000   0.000000
     6  O    0.000000   0.000000   0.000000   0.000000   0.000000   0.000000
     7  C    0.000000   0.000000   0.000000   0.000000   0.000000   0.000000
     8  C    0.000000   0.000000   0.000000   0.000000   0.000000   0.000000
     9  O    0.000000   0.000000   0.000000   0.000000   0.000000   0.000000
    10  O    0.000000   0.000000   0.000000   0.000000   0.000000   0.000000
    11  N    0.000000   0.000000   0.000000   0.000000   0.000000   0.000000
    12  N    0.000000   0.000000   0.000000   0.000000   0.000000   0.000000
    13  N    0.000000   0.000000   0.000000   0.000000   0.000000   0.000000
    14  C    0.000000   0.000000   0.000000   0.000000   0.000000   0.000000
    15  C    0.000000   0.000000   0.000000   0.000000   0.000000   0.000000
    16  C    0.000000   0.000000   0.000000   0.000000   0.000000   0.000000
    17  C    0.000000   0.000000   0.000000   0.000000   0.000000   0.000000
    18  C    0.000000   0.000000   0.000000   0.000000   0.000000   0.000000
    19  C    0.000000   0.000000   0.000000   0.000000   0.000000   0.000000
    20  C    0.000000   0.000000   0.000000   0.000000   0.000000   0.000000
    21  N    0.000000   0.000000   0.000000   0.000000   0.000000   0.000000
    22  C    0.000000   0.000000   0.000000   0.000000   0.000000   0.000000
    23  C    0.000000   0.000000   0.000000   0.000000   0.000000   0.000000
    24  C    0.000000   0.000000   0.000000   0.000000   0.000000   0.000000
    25  C    0.000000   0.000000   0.000000   0.000000   0.000000   0.000000
    26  C    0.000000   0.000000   0.000000   0.000000   0.000000   0.000000
    27  C    0.000000   0.000000   0.000000   0.000000   0.000000   0.000000
    28  C    0.000000   0.000000   0.000000   0.000000   0.000000   0.000000
    29  O    0.000000   0.000000   0.000000   0.000000   0.000000   0.000000
    30  N    0.000000   0.000000   0.000000   0.000000   0.000000   0.000000
    31  N    0.000000   0.000000   0.000000   0.000000   0.000000   0.000000
    32  C    0.000000   0.000000   0.000000   0.000000   0.000000   0.000000
    33  C    0.000000   0.000000   0.000000   0.000000   0.000000   0.000000
    34  C    0.000000   0.000000   0.000000   0.000000   0.000000   0.000000
    35  C    0.000000   0.000000   0.000000   0.000000   0.000000   0.000000
    36  C    0.000000   0.000000   0.000000   0.000000   0.000000   0.000000
    37  C    0.000000   0.000000   0.000000   0.000000   0.000000   0.000000
    38  C    0.000000   0.000000   0.000000   0.000000   0.000000   0.000000
    39  O    0.000000   0.000000   0.000000   0.000000   0.000000   0.000000
    40  H    0.000000   0.000000   0.000000   0.000000   0.000000   0.000000
    41  H    0.000000   0.000000   0.000000   0.000000   0.000000   0.000000
    42  H    0.000000   0.000000   0.000000   0.000000   0.000000   0.000000
    43  H    0.000000   0.000000   0.000000   0.000000   0.000000   0.000000
    44  H    0.000000   0.000000   0.000000   0.000000   0.000000   0.000000
    45  H    0.000000   0.000000   0.000000   0.000000   0.000000   0.000000
    46  H    0.000000   0.000000   0.000000   0.000000   0.000000   0.000000
    47  H    0.000000   0.000000   0.000000   0.000000   0.000000   0.000000
    48  H    0.000000   0.000000   0.000000   0.000000   0.000000   0.000000
    49  H    0.000000   0.000000   0.000000   0.000000   0.000000   0.000000
    50  H    0.000000   0.000000   0.000000   0.000000   0.000000   0.000000
    51  H    0.000000   0.000000   0.000000   0.000000   0.000000   0.000000
    52  H    0.000000   0.000000   0.000000   0.000000   0.000000   0.000000
    53  H    0.000000   0.000000   0.000000   0.000000   0.000000   0.000000
    54  H    0.000000   0.000000   0.000000   0.000000   0.000000   0.000000
    55  H    0.000000   0.000000   0.000000   0.000000   0.000000   0.000000
    56  H    0.000000   0.000000   0.000000   0.000000   0.000000   0.000000
    57  H    0.000000   0.000000   0.000000   0.000000   0.000000   0.000000
    58  H    0.000000   0.000000   0.000000   0.000000   0.000000   0.000000
    59  H    0.000000   0.000000   0.000000   0.000000   0.000000   0.000000
    60  H    0.000000   0.000000   0.000000   0.000000   0.000000   0.000000
    61  H    0.000000   0.000000   0.000000   0.000000   0.000000   0.000000
    62  H    0.000000   0.000000   0.000000   0.000000   0.000000   0.000000
    63  H    0.000000   0.000000   0.000000   0.000000   0.000000   0.000000
    64  O    0.000000   0.000000   0.000000   0.000000   0.000000   0.000000
    65  H    0.000000   0.000000   0.000000   0.000000   0.000000   0.000000
    66  H    0.000000   0.000000   0.000000   0.000000   0.000000   0.000000
             49         50         51         52         53         54
     1  O    0.000000   0.000000   0.000000   0.000000   0.000000   0.000000
     2  C    0.000000   0.000000   0.000000   0.000000   0.000000   0.000000
     3  C    0.000000   0.000000   0.000000   0.000000   0.000000   0.000000
     4  C    0.000000   0.000000   0.000000   0.000000   0.000000   0.000000
     5  C    0.000000   0.000000   0.000000   0.000000   0.000000   0.000000
     6  O    0.000000   0.000000   0.000000   0.000000   0.000000   0.000000
     7  C    0.000000   0.000000   0.000000   0.000000   0.000000   0.000000
     8  C    0.000000   0.000000   0.000000   0.000000   0.000000   0.000000
     9  O    0.000000   0.000000   0.000000   0.000000   0.000000   0.000000
    10  O    0.000000   0.000000   0.000000   0.000000   0.000000   0.000000
    11  N    0.000000   0.000000   0.000000   0.000000   0.000000   0.000000
    12  N    0.000000   0.000000   0.000000   0.000000   0.000000   0.000000
    13  N    0.000000   0.000000   0.000000   0.000000   0.000000   0.000000
    14  C    0.000000   0.000000   0.000000   0.000000   0.000000   0.000000
    15  C    0.000000   0.000000   0.000000   0.000000   0.000000   0.000000
    16  C    0.000000   0.000000   0.000000   0.000000   0.000000   0.000000
    17  C    0.000000   0.000000   0.000000   0.000000   0.000000   0.000000
    18  C    0.000000   0.000000   0.000000   0.000000   0.000000   0.000000
    19  C    0.000000   0.000000   0.000000   0.000000   0.000000   0.000000
    20  C    0.000000   0.000000   0.000000   0.000000   0.000000   0.000000
    21  N    0.000000   0.000000   0.000000   0.000000   0.000000   0.000000
    22  C    0.000000   0.000000   0.000000   0.000000   0.000000   0.000000
    23  C    0.000000   0.000000   0.000000   0.000000   0.000000   0.000000
    24  C    0.000000   0.000000   0.000000   0.000000   0.000000   0.000000
    25  C    0.000000   0.000000   0.000000   0.000000   0.000000   0.000000
    26  C    0.000000   0.000000   0.000000   0.000000   0.000000   0.000000
    27  C    0.000000   0.000000   0.000000   0.000000   0.000000   0.000000
    28  C    0.000000   0.000000   0.000000   0.000000   0.000000   0.000000
    29  O    0.000000   0.000000   0.000000   0.000000   0.000000   0.000000
    30  N    0.000000   0.000000   0.000000   0.000000   0.000000   0.000000
    31  N    0.000000   0.000000   0.000000   0.000000   0.000000   0.000000
    32  C    0.000000   0.000000   0.000000   0.000000   0.000000   0.000000
    33  C    0.000000   0.000000   0.000000   0.000000   0.000000   0.000000
    34  C    0.000000   0.000000   0.000000   0.000000   0.000000   0.000000
    35  C    0.000000   0.000000   0.000000   0.000000   0.000000   0.000000
    36  C    0.000000   0.000000   0.000000   0.000000   0.000000   0.000000
    37  C    0.000000   0.000000   0.000000   0.000000   0.000000   0.000000
    38  C    0.000000   0.000000   0.000000   0.000000   0.000000   0.000000
    39  O    0.000000   0.000000   0.000000   0.000000   0.000000   0.000000
    40  H    0.000000   0.000000   0.000000   0.000000   0.000000   0.000000
    41  H    0.000000   0.000000   0.000000   0.000000   0.000000   0.000000
    42  H    0.000000   0.000000   0.000000   0.000000   0.000000   0.000000
    43  H    0.000000   0.000000   0.000000   0.000000   0.000000   0.000000
    44  H    0.000000   0.000000   0.000000   0.000000   0.000000   0.000000
    45  H    0.000000   0.000000   0.000000   0.000000   0.000000   0.000000
    46  H    0.000000   0.000000   0.000000   0.000000   0.000000   0.000000
    47  H    0.000000   0.000000   0.000000   0.000000   0.000000   0.000000
    48  H    0.000000   0.000000   0.000000   0.000000   0.000000   0.000000
    49  H    0.000000   0.000000   0.000000   0.000000   0.000000   0.000000
    50  H    0.000000   0.000000   0.000000   0.000000   0.000000   0.000000
    51  H    0.000000   0.000000   0.000000   0.000000   0.000000   0.000000
    52  H    0.000000   0.000000   0.000000   0.000000   0.000000   0.000000
    53  H    0.000000   0.000000   0.000000   0.000000   0.000000   0.000000
    54  H    0.000000   0.000000   0.000000   0.000000   0.000000   0.000000
    55  H    0.000000   0.000000   0.000000   0.000000   0.000000   0.000000
    56  H    0.000000   0.000000   0.000000   0.000000   0.000000   0.000000
    57  H    0.000000   0.000000   0.000000   0.000000   0.000000   0.000000
    58  H    0.000000   0.000000   0.000000   0.000000   0.000000   0.000000
    59  H    0.000000   0.000000   0.000000   0.000000   0.000000   0.000000
    60  H    0.000000   0.000000   0.000000   0.000000   0.000000   0.000000
    61  H    0.000000   0.000000   0.000000   0.000000   0.000000   0.000000
    62  H    0.000000   0.000000   0.000000   0.000000   0.000000   0.000000
    63  H    0.000000   0.000000   0.000000   0.000000   0.000000   0.000000
    64  O    0.000000   0.000000   0.000000   0.000000   0.000000   0.000000
    65  H    0.000000   0.000000   0.000000   0.000000   0.000000   0.000000
    66  H    0.000000   0.000000   0.000000   0.000000   0.000000   0.000000
             55         56         57         58         59         60
     1  O    0.000000   0.000000   0.000000   0.000000   0.000000   0.000000
     2  C    0.000000   0.000000   0.000000   0.000000   0.000000   0.000000
     3  C    0.000000   0.000000   0.000000   0.000000   0.000000   0.000000
     4  C    0.000000   0.000000   0.000000   0.000000   0.000000   0.000000
     5  C    0.000000   0.000000   0.000000   0.000000   0.000000   0.000000
     6  O    0.000000   0.000000   0.000000   0.000000   0.000000   0.000000
     7  C    0.000000   0.000000   0.000000   0.000000   0.000000   0.000000
     8  C    0.000000   0.000000   0.000000   0.000000   0.000000   0.000000
     9  O    0.000000   0.000000   0.000000   0.000000   0.000000   0.000000
    10  O    0.000000   0.000000   0.000000   0.000000   0.000000   0.000000
    11  N    0.000000   0.000000   0.000000   0.000000   0.000000   0.000000
    12  N    0.000000   0.000000   0.000000   0.000000   0.000000   0.000000
    13  N    0.000000   0.000000   0.000000   0.000000   0.000000   0.000000
    14  C    0.000000   0.000000   0.000000   0.000000   0.000000   0.000000
    15  C    0.000000   0.000000   0.000000   0.000000   0.000000   0.000000
    16  C    0.000000   0.000000   0.000000   0.000000   0.000000   0.000000
    17  C    0.000000   0.000000   0.000000   0.000000   0.000000   0.000000
    18  C    0.000000   0.000000   0.000000   0.000000   0.000000   0.000000
    19  C    0.000000   0.000000   0.000000   0.000000   0.000000   0.000000
    20  C    0.000000   0.000000   0.000000   0.000000   0.000000   0.000000
    21  N    0.000000   0.000000   0.000000   0.000000   0.000000   0.000000
    22  C    0.000000   0.000000   0.000000   0.000000   0.000000   0.000000
    23  C    0.000000   0.000000   0.000000   0.000000   0.000000   0.000000
    24  C    0.000000   0.000000   0.000000   0.000000   0.000000   0.000000
    25  C    0.000000   0.000000   0.000000   0.000000   0.000000   0.000000
    26  C    0.000000   0.000000   0.000000   0.000000   0.000000   0.000000
    27  C    0.000000   0.000000   0.000000   0.000000   0.000000   0.000000
    28  C    0.000000   0.000000   0.000000   0.000000   0.000000   0.000000
    29  O    0.000000   0.000000   0.000000   0.000000   0.000000   0.000000
    30  N    0.000000   0.000000   0.000000   0.000000   0.000000   0.000000
    31  N    0.000000   0.000000   0.000000   0.000000   0.000000   0.000000
    32  C    0.000000   0.000000   0.000000   0.000000   0.000000   0.000000
    33  C    0.000000   0.000000   0.000000   0.000000   0.000000   0.000000
    34  C    0.000000   0.000000   0.000000   0.000000   0.000000   0.000000
    35  C    0.000000   0.000000   0.000000   0.000000   0.000000   0.000000
    36  C    0.000000   0.000000   0.000000   0.000000   0.000000   0.000000
    37  C    0.000000   0.000000   0.000000   0.000000   0.000000   0.000000
    38  C    0.000000   0.000000   0.000000   0.000000   0.000000   0.000000
    39  O    0.000000   0.000000   0.000000   0.000000   0.000000   0.000000
    40  H    0.000000   0.000000   0.000000   0.000000   0.000000   0.000000
    41  H    0.000000   0.000000   0.000000   0.000000   0.000000   0.000000
    42  H    0.000000   0.000000   0.000000   0.000000   0.000000   0.000000
    43  H    0.000000   0.000000   0.000000   0.000000   0.000000   0.000000
    44  H    0.000000   0.000000   0.000000   0.000000   0.000000   0.000000
    45  H    0.000000   0.000000   0.000000   0.000000   0.000000   0.000000
    46  H    0.000000   0.000000   0.000000   0.000000   0.000000   0.000000
    47  H    0.000000   0.000000   0.000000   0.000000   0.000000   0.000000
    48  H    0.000000   0.000000   0.000000   0.000000   0.000000   0.000000
    49  H    0.000000   0.000000   0.000000   0.000000   0.000000   0.000000
    50  H    0.000000   0.000000   0.000000   0.000000   0.000000   0.000000
    51  H    0.000000   0.000000   0.000000   0.000000   0.000000   0.000000
    52  H    0.000000   0.000000   0.000000   0.000000   0.000000   0.000000
    53  H    0.000000   0.000000   0.000000   0.000000   0.000000   0.000000
    54  H    0.000000   0.000000   0.000000   0.000000   0.000000   0.000000
    55  H    0.000000   0.000000   0.000000   0.000000   0.000000   0.000000
    56  H    0.000000   0.000000   0.000000   0.000000   0.000000   0.000000
    57  H    0.000000   0.000000   0.000000   0.000000   0.000000   0.000000
    58  H    0.000000   0.000000   0.000000   0.000000   0.000000   0.000000
    59  H    0.000000   0.000000   0.000000   0.000000   0.000000   0.000000
    60  H    0.000000   0.000000   0.000000   0.000000   0.000000   0.000000
    61  H    0.000000   0.000000   0.000000   0.000000   0.000000   0.000000
    62  H    0.000000   0.000000   0.000000   0.000000   0.000000   0.000000
    63  H    0.000000   0.000000   0.000000   0.000000   0.000000   0.000000
    64  O    0.000000   0.000000   0.000000   0.000000   0.000000   0.000000
    65  H    0.000000   0.000000   0.000000   0.000000   0.000000   0.000000
    66  H    0.000000   0.000000   0.000000   0.000000   0.000000   0.000000
             61         62         63         64         65         66
     1  O    0.000000   0.000000   0.000000   0.000000   0.000000   0.000000
     2  C    0.000000   0.000000   0.000000   0.000000   0.000000   0.000000
     3  C    0.000000   0.000000   0.000000   0.000000   0.000000   0.000000
     4  C    0.000000   0.000000   0.000000   0.000000   0.000000   0.000000
     5  C    0.000000   0.000000   0.000000   0.000000   0.000000   0.000000
     6  O    0.000000   0.000000   0.000000   0.000000   0.000000   0.000000
     7  C    0.000000   0.000000   0.000000   0.000000   0.000000   0.000000
     8  C    0.000000   0.000000   0.000000   0.000000   0.000000   0.000000
     9  O    0.000000   0.000000   0.000000   0.000000   0.000000   0.000000
    10  O    0.000000   0.000000   0.000000   0.000000   0.000000   0.000000
    11  N    0.000000   0.000000   0.000000   0.000000   0.000000   0.000000
    12  N    0.000000   0.000000   0.000000   0.000000   0.000000   0.000000
    13  N    0.000000   0.000000   0.000000   0.000000   0.000000   0.000000
    14  C    0.000000   0.000000   0.000000   0.000000   0.000000   0.000000
    15  C    0.000000   0.000000   0.000000   0.000000   0.000000   0.000000
    16  C    0.000000   0.000000   0.000000   0.000000   0.000000   0.000000
    17  C    0.000000   0.000000   0.000000   0.000000   0.000000   0.000000
    18  C    0.000000   0.000000   0.000000   0.000000   0.000000   0.000000
    19  C    0.000000   0.000000   0.000000   0.000000   0.000000   0.000000
    20  C    0.000000   0.000000   0.000000   0.000000   0.000000   0.000000
    21  N    0.000000   0.000000   0.000000   0.000000   0.000000   0.000000
    22  C    0.000000   0.000000   0.000000   0.000000   0.000000   0.000000
    23  C    0.000000   0.000000   0.000000   0.000000   0.000000   0.000000
    24  C    0.000000   0.000000   0.000000   0.000000   0.000000   0.000000
    25  C    0.000000   0.000000   0.000000   0.000000   0.000000   0.000000
    26  C    0.000000   0.000000   0.000000   0.000000   0.000000   0.000000
    27  C    0.000000   0.000000   0.000000   0.000000   0.000000   0.000000
    28  C    0.000000   0.000000   0.000000   0.000000   0.000000   0.000000
    29  O    0.000000   0.000000   0.000000   0.000000   0.000000   0.000000
    30  N    0.000000   0.000000   0.000000   0.000000   0.000000   0.000000
    31  N    0.000000   0.000000   0.000000   0.000000   0.000000   0.000000
    32  C    0.000000   0.000000   0.000000   0.000000   0.000000   0.000000
    33  C    0.000000   0.000000   0.000000   0.000000   0.000000   0.000000
    34  C    0.000000   0.000000   0.000000   0.000000   0.000000   0.000000
    35  C    0.000000   0.000000   0.000000   0.000000   0.000000   0.000000
    36  C    0.000000   0.000000   0.000000   0.000000   0.000000   0.000000
    37  C    0.000000   0.000000   0.000000   0.000000   0.000000   0.000000
    38  C    0.000000   0.000000   0.000000   0.000000   0.000000   0.000000
    39  O    0.000000   0.000000   0.000000   0.000000   0.000000   0.000000
    40  H    0.000000   0.000000   0.000000   0.000000   0.000000   0.000000
    41  H    0.000000   0.000000   0.000000   0.000000   0.000000   0.000000
    42  H    0.000000   0.000000   0.000000   0.000000   0.000000   0.000000
    43  H    0.000000   0.000000   0.000000   0.000000   0.000000   0.000000
    44  H    0.000000   0.000000   0.000000   0.000000   0.000000   0.000000
    45  H    0.000000   0.000000   0.000000   0.000000   0.000000   0.000000
    46  H    0.000000   0.000000   0.000000   0.000000   0.000000   0.000000
    47  H    0.000000   0.000000   0.000000   0.000000   0.000000   0.000000
    48  H    0.000000   0.000000   0.000000   0.000000   0.000000   0.000000
    49  H    0.000000   0.000000   0.000000   0.000000   0.000000   0.000000
    50  H    0.000000   0.000000   0.000000   0.000000   0.000000   0.000000
    51  H    0.000000   0.000000   0.000000   0.000000   0.000000   0.000000
    52  H    0.000000   0.000000   0.000000   0.000000   0.000000   0.000000
    53  H    0.000000   0.000000   0.000000   0.000000   0.000000   0.000000
    54  H    0.000000   0.000000   0.000000   0.000000   0.000000   0.000000
    55  H    0.000000   0.000000   0.000000   0.000000   0.000000   0.000000
    56  H    0.000000   0.000000   0.000000   0.000000   0.000000   0.000000
    57  H    0.000000   0.000000   0.000000   0.000000   0.000000   0.000000
    58  H    0.000000   0.000000   0.000000   0.000000   0.000000   0.000000
    59  H    0.000000   0.000000   0.000000   0.000000   0.000000   0.000000
    60  H    0.000000   0.000000   0.000000   0.000000   0.000000   0.000000
    61  H    0.000000   0.000000   0.000000   0.000000   0.000000   0.000000
    62  H    0.000000   0.000000   0.000000   0.000000   0.000000   0.000000
    63  H    0.000000   0.000000   0.000000   0.000000   0.000000   0.000000
    64  O    0.000000   0.000000   0.000000   0.000000   0.000000   0.000000
    65  H    0.000000   0.000000   0.000000   0.000000   0.000000   0.000000
    66  H    0.000000   0.000000   0.000000   0.000000   0.000000   0.000000
 Mulliken atomic spin densities:
              1
     1  O    0.000000
     2  C    0.000000
     3  C    0.000000
     4  C    0.000000
     5  C    0.000000
     6  O    0.000000
     7  C    0.000000
     8  C    0.000000
     9  O    0.000000
    10  O    0.000000
    11  N    0.000000
    12  N    0.000000
    13  N    0.000000
    14  C    0.000000
    15  C    0.000000
    16  C    0.000000
    17  C    0.000000
    18  C    0.000000
    19  C    0.000000
    20  C    0.000000
    21  N    0.000000
    22  C    0.000000
    23  C    0.000000
    24  C    0.000000
    25  C    0.000000
    26  C    0.000000
    27  C    0.000000
    28  C    0.000000
    29  O    0.000000
    30  N    0.000000
    31  N    0.000000
    32  C    0.000000
    33  C    0.000000
    34  C    0.000000
    35  C    0.000000
    36  C    0.000000
    37  C    0.000000
    38  C    0.000000
    39  O    0.000000
    40  H    0.000000
    41  H    0.000000
    42  H    0.000000
    43  H    0.000000
    44  H    0.000000
    45  H    0.000000
    46  H    0.000000
    47  H    0.000000
    48  H    0.000000
    49  H    0.000000
    50  H    0.000000
    51  H    0.000000
    52  H    0.000000
    53  H    0.000000
    54  H    0.000000
    55  H    0.000000
    56  H    0.000000
    57  H    0.000000
    58  H    0.000000
    59  H    0.000000
    60  H    0.000000
    61  H    0.000000
    62  H    0.000000
    63  H    0.000000
    64  O    0.000000
    65  H    0.000000
    66  H    0.000000
 Sum of Mulliken atomic spin densities =   0.00000
 Electronic spatial extent (au):  <R**2>=          35270.1588
 Charge=              0.0000 electrons
 Dipole moment (field-independent basis, Debye):
    X=             -4.4968    Y=             -0.8714    Z=              3.1748  Tot=              5.5732
 Quadrupole moment (field-independent basis, Debye-Ang):
   XX=           -173.2080   YY=           -166.0102   ZZ=           -229.8755
   XY=             23.4495   XZ=              8.1742   YZ=             -6.2053
 Traceless Quadrupole moment (field-independent basis, Debye-Ang):
   XX=             16.4899   YY=             23.6877   ZZ=            -40.1776
   XY=             23.4495   XZ=              8.1742   YZ=             -6.2053
 Octapole moment (field-independent basis, Debye-Ang**2):
  XXX=           -573.1589  YYY=            130.9832  ZZZ=             -9.8328  XYY=            102.8277
  XXY=             49.7550  XXZ=             70.3867  XZZ=            -25.0670  YZZ=             21.4334
  YYZ=            -46.3322  XYZ=             36.0546
 Hexadecapole moment (field-independent basis, Debye-Ang**3):
 XXXX=         -22285.3326 YYYY=         -13413.5033 ZZZZ=          -1204.3427 XXXY=            142.6982
 XXXZ=            642.9450 YYYX=            146.0073 YYYZ=           -654.4946 ZZZX=             77.4484
 ZZZY=             -5.4155 XXYY=          -6527.5543 XXZZ=          -5233.1176 YYZZ=          -3054.3533
 XXYZ=           -446.8092 YYXZ=             17.3520 ZZXY=             46.2430
 N-N= 4.166709458947D+03 E-N=-1.915257107310D+04  KE= 2.830047575913D+03
                          Isotropic Fermi Contact Couplings
        Atom                 a.u.       MegaHertz       Gauss      10(-4) cm-1
     1  O(17)              0.00000       0.00000       0.00000       0.00000
     2  C(13)              0.00000       0.00000       0.00000       0.00000
     3  C(13)              0.00000       0.00000       0.00000       0.00000
     4  C(13)              0.00000       0.00000       0.00000       0.00000
     5  C(13)              0.00000       0.00000       0.00000       0.00000
     6  O(17)              0.00000       0.00000       0.00000       0.00000
     7  C(13)              0.00000       0.00000       0.00000       0.00000
     8  C(13)              0.00000       0.00000       0.00000       0.00000
     9  O(17)              0.00000       0.00000       0.00000       0.00000
    10  O(17)              0.00000       0.00000       0.00000       0.00000
    11  N(14)              0.00000       0.00000       0.00000       0.00000
    12  N(14)              0.00000       0.00000       0.00000       0.00000
    13  N(14)              0.00000       0.00000       0.00000       0.00000
    14  C(13)              0.00000       0.00000       0.00000       0.00000
    15  C(13)              0.00000       0.00000       0.00000       0.00000
    16  C(13)              0.00000       0.00000       0.00000       0.00000
    17  C(13)              0.00000       0.00000       0.00000       0.00000
    18  C(13)              0.00000       0.00000       0.00000       0.00000
    19  C(13)              0.00000       0.00000       0.00000       0.00000
    20  C(13)              0.00000       0.00000       0.00000       0.00000
    21  N(14)              0.00000       0.00000       0.00000       0.00000
    22  C(13)              0.00000       0.00000       0.00000       0.00000
    23  C(13)              0.00000       0.00000       0.00000       0.00000
    24  C(13)              0.00000       0.00000       0.00000       0.00000
    25  C(13)              0.00000       0.00000       0.00000       0.00000
    26  C(13)              0.00000       0.00000       0.00000       0.00000
    27  C(13)              0.00000       0.00000       0.00000       0.00000
    28  C(13)              0.00000       0.00000       0.00000       0.00000
    29  O(17)              0.00000       0.00000       0.00000       0.00000
    30  N(14)              0.00000       0.00000       0.00000       0.00000
    31  N(14)              0.00000       0.00000       0.00000       0.00000
    32  C(13)              0.00000       0.00000       0.00000       0.00000
    33  C(13)              0.00000       0.00000       0.00000       0.00000
    34  C(13)              0.00000       0.00000       0.00000       0.00000
    35  C(13)              0.00000       0.00000       0.00000       0.00000
    36  C(13)              0.00000       0.00000       0.00000       0.00000
    37  C(13)              0.00000       0.00000       0.00000       0.00000
    38  C(13)              0.00000       0.00000       0.00000       0.00000
    39  O(17)              0.00000       0.00000       0.00000       0.00000
    40  H(1)               0.00000       0.00000       0.00000       0.00000
    41  H(1)               0.00000       0.00000       0.00000       0.00000
    42  H(1)               0.00000       0.00000       0.00000       0.00000
    43  H(1)               0.00000       0.00000       0.00000       0.00000
    44  H(1)               0.00000       0.00000       0.00000       0.00000
    45  H(1)               0.00000       0.00000       0.00000       0.00000
    46  H(1)               0.00000       0.00000       0.00000       0.00000
    47  H(1)               0.00000       0.00000       0.00000       0.00000
    48  H(1)               0.00000       0.00000       0.00000       0.00000
    49  H(1)               0.00000       0.00000       0.00000       0.00000
    50  H(1)               0.00000       0.00000       0.00000       0.00000
    51  H(1)               0.00000       0.00000       0.00000       0.00000
    52  H(1)               0.00000       0.00000       0.00000       0.00000
    53  H(1)               0.00000       0.00000       0.00000       0.00000
    54  H(1)               0.00000       0.00000       0.00000       0.00000
    55  H(1)               0.00000       0.00000       0.00000       0.00000
    56  H(1)               0.00000       0.00000       0.00000       0.00000
    57  H(1)               0.00000       0.00000       0.00000       0.00000
    58  H(1)               0.00000       0.00000       0.00000       0.00000
    59  H(1)               0.00000       0.00000       0.00000       0.00000
    60  H(1)               0.00000       0.00000       0.00000       0.00000
    61  H(1)               0.00000       0.00000       0.00000       0.00000
    62  H(1)               0.00000       0.00000       0.00000       0.00000
    63  H(1)               0.00000       0.00000       0.00000       0.00000
    64  O(17)              0.00000       0.00000       0.00000       0.00000
    65  H(1)               0.00000       0.00000       0.00000       0.00000
    66  H(1)               0.00000       0.00000       0.00000       0.00000
 --------------------------------------------------------
       Center         ----  Spin Dipole Couplings  ----
                      3XX-RR        3YY-RR        3ZZ-RR
 --------------------------------------------------------
     1   Atom        0.000000      0.000000      0.000000
     2   Atom        0.000000      0.000000      0.000000
     3   Atom        0.000000      0.000000      0.000000
     4   Atom        0.000000      0.000000      0.000000
     5   Atom        0.000000      0.000000      0.000000
     6   Atom        0.000000      0.000000      0.000000
     7   Atom        0.000000      0.000000      0.000000
     8   Atom        0.000000      0.000000      0.000000
     9   Atom        0.000000      0.000000      0.000000
    10   Atom        0.000000      0.000000      0.000000
    11   Atom        0.000000      0.000000      0.000000
    12   Atom        0.000000      0.000000      0.000000
    13   Atom        0.000000      0.000000      0.000000
    14   Atom        0.000000      0.000000      0.000000
    15   Atom        0.000000      0.000000      0.000000
    16   Atom        0.000000      0.000000      0.000000
    17   Atom        0.000000      0.000000      0.000000
    18   Atom        0.000000      0.000000      0.000000
    19   Atom        0.000000      0.000000      0.000000
    20   Atom        0.000000      0.000000      0.000000
    21   Atom        0.000000      0.000000      0.000000
    22   Atom        0.000000      0.000000      0.000000
    23   Atom        0.000000      0.000000      0.000000
    24   Atom        0.000000      0.000000      0.000000
    25   Atom        0.000000      0.000000      0.000000
    26   Atom        0.000000      0.000000      0.000000
    27   Atom        0.000000      0.000000      0.000000
    28   Atom        0.000000      0.000000      0.000000
    29   Atom        0.000000      0.000000      0.000000
    30   Atom        0.000000      0.000000      0.000000
    31   Atom        0.000000      0.000000      0.000000
    32   Atom        0.000000      0.000000      0.000000
    33   Atom        0.000000      0.000000      0.000000
    34   Atom        0.000000      0.000000      0.000000
    35   Atom        0.000000      0.000000      0.000000
    36   Atom        0.000000      0.000000      0.000000
    37   Atom        0.000000      0.000000      0.000000
    38   Atom        0.000000      0.000000      0.000000
    39   Atom        0.000000      0.000000      0.000000
    40   Atom        0.000000      0.000000      0.000000
    41   Atom        0.000000      0.000000      0.000000
    42   Atom        0.000000      0.000000      0.000000
    43   Atom        0.000000      0.000000      0.000000
    44   Atom        0.000000      0.000000      0.000000
    45   Atom        0.000000      0.000000      0.000000
    46   Atom        0.000000      0.000000      0.000000
    47   Atom        0.000000      0.000000      0.000000
    48   Atom        0.000000      0.000000      0.000000
    49   Atom        0.000000      0.000000      0.000000
    50   Atom        0.000000      0.000000      0.000000
    51   Atom        0.000000      0.000000      0.000000
    52   Atom        0.000000      0.000000      0.000000
    53   Atom        0.000000      0.000000      0.000000
    54   Atom        0.000000      0.000000      0.000000
    55   Atom        0.000000      0.000000      0.000000
    56   Atom        0.000000      0.000000      0.000000
    57   Atom        0.000000      0.000000      0.000000
    58   Atom        0.000000      0.000000      0.000000
    59   Atom        0.000000      0.000000      0.000000
    60   Atom        0.000000      0.000000      0.000000
    61   Atom        0.000000      0.000000      0.000000
    62   Atom        0.000000      0.000000      0.000000
    63   Atom        0.000000      0.000000      0.000000
    64   Atom        0.000000      0.000000      0.000000
    65   Atom        0.000000      0.000000      0.000000
    66   Atom        0.000000      0.000000      0.000000
 --------------------------------------------------------
                        XY            XZ            YZ
 --------------------------------------------------------
     1   Atom        0.000000      0.000000      0.000000
     2   Atom        0.000000      0.000000      0.000000
     3   Atom        0.000000      0.000000      0.000000
     4   Atom        0.000000      0.000000      0.000000
     5   Atom        0.000000      0.000000      0.000000
     6   Atom        0.000000      0.000000      0.000000
     7   Atom        0.000000      0.000000      0.000000
     8   Atom        0.000000      0.000000      0.000000
     9   Atom        0.000000      0.000000      0.000000
    10   Atom        0.000000      0.000000      0.000000
    11   Atom        0.000000      0.000000      0.000000
    12   Atom        0.000000      0.000000      0.000000
    13   Atom        0.000000      0.000000      0.000000
    14   Atom        0.000000      0.000000      0.000000
    15   Atom        0.000000      0.000000      0.000000
    16   Atom        0.000000      0.000000      0.000000
    17   Atom        0.000000      0.000000      0.000000
    18   Atom        0.000000      0.000000      0.000000
    19   Atom        0.000000      0.000000      0.000000
    20   Atom        0.000000      0.000000      0.000000
    21   Atom        0.000000      0.000000      0.000000
    22   Atom        0.000000      0.000000      0.000000
    23   Atom        0.000000      0.000000      0.000000
    24   Atom        0.000000      0.000000      0.000000
    25   Atom        0.000000      0.000000      0.000000
    26   Atom        0.000000      0.000000      0.000000
    27   Atom        0.000000      0.000000      0.000000
    28   Atom        0.000000      0.000000      0.000000
    29   Atom        0.000000      0.000000      0.000000
    30   Atom        0.000000      0.000000      0.000000
    31   Atom        0.000000      0.000000      0.000000
    32   Atom        0.000000      0.000000      0.000000
    33   Atom        0.000000      0.000000      0.000000
    34   Atom        0.000000      0.000000      0.000000
    35   Atom        0.000000      0.000000      0.000000
    36   Atom        0.000000      0.000000      0.000000
    37   Atom        0.000000      0.000000      0.000000
    38   Atom        0.000000      0.000000      0.000000
    39   Atom        0.000000      0.000000      0.000000
    40   Atom        0.000000      0.000000      0.000000
    41   Atom        0.000000      0.000000      0.000000
    42   Atom        0.000000      0.000000      0.000000
    43   Atom        0.000000      0.000000      0.000000
    44   Atom        0.000000      0.000000      0.000000
    45   Atom        0.000000      0.000000      0.000000
    46   Atom        0.000000      0.000000      0.000000
    47   Atom        0.000000      0.000000      0.000000
    48   Atom        0.000000      0.000000      0.000000
    49   Atom        0.000000      0.000000      0.000000
    50   Atom        0.000000      0.000000      0.000000
    51   Atom        0.000000      0.000000      0.000000
    52   Atom        0.000000      0.000000      0.000000
    53   Atom        0.000000      0.000000      0.000000
    54   Atom        0.000000      0.000000      0.000000
    55   Atom        0.000000      0.000000      0.000000
    56   Atom        0.000000      0.000000      0.000000
    57   Atom        0.000000      0.000000      0.000000
    58   Atom        0.000000      0.000000      0.000000
    59   Atom        0.000000      0.000000      0.000000
    60   Atom        0.000000      0.000000      0.000000
    61   Atom        0.000000      0.000000      0.000000
    62   Atom        0.000000      0.000000      0.000000
    63   Atom        0.000000      0.000000      0.000000
    64   Atom        0.000000      0.000000      0.000000
    65   Atom        0.000000      0.000000      0.000000
    66   Atom        0.000000      0.000000      0.000000
 --------------------------------------------------------


 ---------------------------------------------------------------------------------
              Anisotropic Spin Dipole Couplings in Principal Axis System
 ---------------------------------------------------------------------------------

       Atom             a.u.   MegaHertz   Gauss  10(-4) cm-1        Axes

              Baa     0.0000     0.000     0.000     0.000  1.0000  0.0000  0.0000
     1 O(17)  Bbb     0.0000     0.000     0.000     0.000  0.0000  1.0000  0.0000
              Bcc     0.0000     0.000     0.000     0.000  0.0000  0.0000  1.0000
 
              Baa     0.0000     0.000     0.000     0.000  1.0000  0.0000  0.0000
     2 C(13)  Bbb     0.0000     0.000     0.000     0.000  0.0000  1.0000  0.0000
              Bcc     0.0000     0.000     0.000     0.000  0.0000  0.0000  1.0000
 
              Baa     0.0000     0.000     0.000     0.000  1.0000  0.0000  0.0000
     3 C(13)  Bbb     0.0000     0.000     0.000     0.000  0.0000  1.0000  0.0000
              Bcc     0.0000     0.000     0.000     0.000  0.0000  0.0000  1.0000
 
              Baa     0.0000     0.000     0.000     0.000  1.0000  0.0000  0.0000
     4 C(13)  Bbb     0.0000     0.000     0.000     0.000  0.0000  1.0000  0.0000
              Bcc     0.0000     0.000     0.000     0.000  0.0000  0.0000  1.0000
 
              Baa     0.0000     0.000     0.000     0.000  1.0000  0.0000  0.0000
     5 C(13)  Bbb     0.0000     0.000     0.000     0.000  0.0000  1.0000  0.0000
              Bcc     0.0000     0.000     0.000     0.000  0.0000  0.0000  1.0000
 
              Baa     0.0000     0.000     0.000     0.000  1.0000  0.0000  0.0000
     6 O(17)  Bbb     0.0000     0.000     0.000     0.000  0.0000  1.0000  0.0000
              Bcc     0.0000     0.000     0.000     0.000  0.0000  0.0000  1.0000
 
              Baa     0.0000     0.000     0.000     0.000  1.0000  0.0000  0.0000
     7 C(13)  Bbb     0.0000     0.000     0.000     0.000  0.0000  1.0000  0.0000
              Bcc     0.0000     0.000     0.000     0.000  0.0000  0.0000  1.0000
 
              Baa     0.0000     0.000     0.000     0.000  1.0000  0.0000  0.0000
     8 C(13)  Bbb     0.0000     0.000     0.000     0.000  0.0000  1.0000  0.0000
              Bcc     0.0000     0.000     0.000     0.000  0.0000  0.0000  1.0000
 
              Baa     0.0000     0.000     0.000     0.000  1.0000  0.0000  0.0000
     9 O(17)  Bbb     0.0000     0.000     0.000     0.000  0.0000  1.0000  0.0000
              Bcc     0.0000     0.000     0.000     0.000  0.0000  0.0000  1.0000
 
              Baa     0.0000     0.000     0.000     0.000  1.0000  0.0000  0.0000
    10 O(17)  Bbb     0.0000     0.000     0.000     0.000  0.0000  1.0000  0.0000
              Bcc     0.0000     0.000     0.000     0.000  0.0000  0.0000  1.0000
 
              Baa     0.0000     0.000     0.000     0.000  1.0000  0.0000  0.0000
    11 N(14)  Bbb     0.0000     0.000     0.000     0.000  0.0000  1.0000  0.0000
              Bcc     0.0000     0.000     0.000     0.000  0.0000  0.0000  1.0000
 
              Baa     0.0000     0.000     0.000     0.000  1.0000  0.0000  0.0000
    12 N(14)  Bbb     0.0000     0.000     0.000     0.000  0.0000  1.0000  0.0000
              Bcc     0.0000     0.000     0.000     0.000  0.0000  0.0000  1.0000
 
              Baa     0.0000     0.000     0.000     0.000  1.0000  0.0000  0.0000
    13 N(14)  Bbb     0.0000     0.000     0.000     0.000  0.0000  1.0000  0.0000
              Bcc     0.0000     0.000     0.000     0.000  0.0000  0.0000  1.0000
 
              Baa     0.0000     0.000     0.000     0.000  1.0000  0.0000  0.0000
    14 C(13)  Bbb     0.0000     0.000     0.000     0.000  0.0000  1.0000  0.0000
              Bcc     0.0000     0.000     0.000     0.000  0.0000  0.0000  1.0000
 
              Baa     0.0000     0.000     0.000     0.000  1.0000  0.0000  0.0000
    15 C(13)  Bbb     0.0000     0.000     0.000     0.000  0.0000  1.0000  0.0000
              Bcc     0.0000     0.000     0.000     0.000  0.0000  0.0000  1.0000
 
              Baa     0.0000     0.000     0.000     0.000  1.0000  0.0000  0.0000
    16 C(13)  Bbb     0.0000     0.000     0.000     0.000  0.0000  1.0000  0.0000
              Bcc     0.0000     0.000     0.000     0.000  0.0000  0.0000  1.0000
 
              Baa     0.0000     0.000     0.000     0.000  1.0000  0.0000  0.0000
    17 C(13)  Bbb     0.0000     0.000     0.000     0.000  0.0000  1.0000  0.0000
              Bcc     0.0000     0.000     0.000     0.000  0.0000  0.0000  1.0000
 
              Baa     0.0000     0.000     0.000     0.000  1.0000  0.0000  0.0000
    18 C(13)  Bbb     0.0000     0.000     0.000     0.000  0.0000  1.0000  0.0000
              Bcc     0.0000     0.000     0.000     0.000  0.0000  0.0000  1.0000
 
              Baa     0.0000     0.000     0.000     0.000  1.0000  0.0000  0.0000
    19 C(13)  Bbb     0.0000     0.000     0.000     0.000  0.0000  1.0000  0.0000
              Bcc     0.0000     0.000     0.000     0.000  0.0000  0.0000  1.0000
 
              Baa     0.0000     0.000     0.000     0.000  1.0000  0.0000  0.0000
    20 C(13)  Bbb     0.0000     0.000     0.000     0.000  0.0000  1.0000  0.0000
              Bcc     0.0000     0.000     0.000     0.000  0.0000  0.0000  1.0000
 
              Baa     0.0000     0.000     0.000     0.000  1.0000  0.0000  0.0000
    21 N(14)  Bbb     0.0000     0.000     0.000     0.000  0.0000  1.0000  0.0000
              Bcc     0.0000     0.000     0.000     0.000  0.0000  0.0000  1.0000
 
              Baa     0.0000     0.000     0.000     0.000  1.0000  0.0000  0.0000
    22 C(13)  Bbb     0.0000     0.000     0.000     0.000  0.0000  1.0000  0.0000
              Bcc     0.0000     0.000     0.000     0.000  0.0000  0.0000  1.0000
 
              Baa     0.0000     0.000     0.000     0.000  1.0000  0.0000  0.0000
    23 C(13)  Bbb     0.0000     0.000     0.000     0.000  0.0000  1.0000  0.0000
              Bcc     0.0000     0.000     0.000     0.000  0.0000  0.0000  1.0000
 
              Baa     0.0000     0.000     0.000     0.000  1.0000  0.0000  0.0000
    24 C(13)  Bbb     0.0000     0.000     0.000     0.000  0.0000  1.0000  0.0000
              Bcc     0.0000     0.000     0.000     0.000  0.0000  0.0000  1.0000
 
              Baa     0.0000     0.000     0.000     0.000  1.0000  0.0000  0.0000
    25 C(13)  Bbb     0.0000     0.000     0.000     0.000  0.0000  1.0000  0.0000
              Bcc     0.0000     0.000     0.000     0.000  0.0000  0.0000  1.0000
 
              Baa     0.0000     0.000     0.000     0.000  1.0000  0.0000  0.0000
    26 C(13)  Bbb     0.0000     0.000     0.000     0.000  0.0000  1.0000  0.0000
              Bcc     0.0000     0.000     0.000     0.000  0.0000  0.0000  1.0000
 
              Baa     0.0000     0.000     0.000     0.000  1.0000  0.0000  0.0000
    27 C(13)  Bbb     0.0000     0.000     0.000     0.000  0.0000  1.0000  0.0000
              Bcc     0.0000     0.000     0.000     0.000  0.0000  0.0000  1.0000
 
              Baa     0.0000     0.000     0.000     0.000  1.0000  0.0000  0.0000
    28 C(13)  Bbb     0.0000     0.000     0.000     0.000  0.0000  1.0000  0.0000
              Bcc     0.0000     0.000     0.000     0.000  0.0000  0.0000  1.0000
 
              Baa     0.0000     0.000     0.000     0.000  1.0000  0.0000  0.0000
    29 O(17)  Bbb     0.0000     0.000     0.000     0.000  0.0000  1.0000  0.0000
              Bcc     0.0000     0.000     0.000     0.000  0.0000  0.0000  1.0000
 
              Baa     0.0000     0.000     0.000     0.000  1.0000  0.0000  0.0000
    30 N(14)  Bbb     0.0000     0.000     0.000     0.000  0.0000  1.0000  0.0000
              Bcc     0.0000     0.000     0.000     0.000  0.0000  0.0000  1.0000
 
              Baa     0.0000     0.000     0.000     0.000  1.0000  0.0000  0.0000
    31 N(14)  Bbb     0.0000     0.000     0.000     0.000  0.0000  1.0000  0.0000
              Bcc     0.0000     0.000     0.000     0.000  0.0000  0.0000  1.0000
 
              Baa     0.0000     0.000     0.000     0.000  1.0000  0.0000  0.0000
    32 C(13)  Bbb     0.0000     0.000     0.000     0.000  0.0000  1.0000  0.0000
              Bcc     0.0000     0.000     0.000     0.000  0.0000  0.0000  1.0000
 
              Baa     0.0000     0.000     0.000     0.000  1.0000  0.0000  0.0000
    33 C(13)  Bbb     0.0000     0.000     0.000     0.000  0.0000  1.0000  0.0000
              Bcc     0.0000     0.000     0.000     0.000  0.0000  0.0000  1.0000
 
              Baa     0.0000     0.000     0.000     0.000  1.0000  0.0000  0.0000
    34 C(13)  Bbb     0.0000     0.000     0.000     0.000  0.0000  1.0000  0.0000
              Bcc     0.0000     0.000     0.000     0.000  0.0000  0.0000  1.0000
 
              Baa     0.0000     0.000     0.000     0.000  1.0000  0.0000  0.0000
    35 C(13)  Bbb     0.0000     0.000     0.000     0.000  0.0000  1.0000  0.0000
              Bcc     0.0000     0.000     0.000     0.000  0.0000  0.0000  1.0000
 
              Baa     0.0000     0.000     0.000     0.000  1.0000  0.0000  0.0000
    36 C(13)  Bbb     0.0000     0.000     0.000     0.000  0.0000  1.0000  0.0000
              Bcc     0.0000     0.000     0.000     0.000  0.0000  0.0000  1.0000
 
              Baa     0.0000     0.000     0.000     0.000  1.0000  0.0000  0.0000
    37 C(13)  Bbb     0.0000     0.000     0.000     0.000  0.0000  1.0000  0.0000
              Bcc     0.0000     0.000     0.000     0.000  0.0000  0.0000  1.0000
 
              Baa     0.0000     0.000     0.000     0.000  1.0000  0.0000  0.0000
    38 C(13)  Bbb     0.0000     0.000     0.000     0.000  0.0000  1.0000  0.0000
              Bcc     0.0000     0.000     0.000     0.000  0.0000  0.0000  1.0000
 
              Baa     0.0000     0.000     0.000     0.000  1.0000  0.0000  0.0000
    39 O(17)  Bbb     0.0000     0.000     0.000     0.000  0.0000  1.0000  0.0000
              Bcc     0.0000     0.000     0.000     0.000  0.0000  0.0000  1.0000
 
              Baa     0.0000     0.000     0.000     0.000  1.0000  0.0000  0.0000
    40 H(1)   Bbb     0.0000     0.000     0.000     0.000  0.0000  1.0000  0.0000
              Bcc     0.0000     0.000     0.000     0.000  0.0000  0.0000  1.0000
 
              Baa     0.0000     0.000     0.000     0.000  1.0000  0.0000  0.0000
    41 H(1)   Bbb     0.0000     0.000     0.000     0.000  0.0000  1.0000  0.0000
              Bcc     0.0000     0.000     0.000     0.000  0.0000  0.0000  1.0000
 
              Baa     0.0000     0.000     0.000     0.000  1.0000  0.0000  0.0000
    42 H(1)   Bbb     0.0000     0.000     0.000     0.000  0.0000  1.0000  0.0000
              Bcc     0.0000     0.000     0.000     0.000  0.0000  0.0000  1.0000
 
              Baa     0.0000     0.000     0.000     0.000  1.0000  0.0000  0.0000
    43 H(1)   Bbb     0.0000     0.000     0.000     0.000  0.0000  1.0000  0.0000
              Bcc     0.0000     0.000     0.000     0.000  0.0000  0.0000  1.0000
 
              Baa     0.0000     0.000     0.000     0.000  1.0000  0.0000  0.0000
    44 H(1)   Bbb     0.0000     0.000     0.000     0.000  0.0000  1.0000  0.0000
              Bcc     0.0000     0.000     0.000     0.000  0.0000  0.0000  1.0000
 
              Baa     0.0000     0.000     0.000     0.000  1.0000  0.0000  0.0000
    45 H(1)   Bbb     0.0000     0.000     0.000     0.000  0.0000  1.0000  0.0000
              Bcc     0.0000     0.000     0.000     0.000  0.0000  0.0000  1.0000
 
              Baa     0.0000     0.000     0.000     0.000  1.0000  0.0000  0.0000
    46 H(1)   Bbb     0.0000     0.000     0.000     0.000  0.0000  1.0000  0.0000
              Bcc     0.0000     0.000     0.000     0.000  0.0000  0.0000  1.0000
 
              Baa     0.0000     0.000     0.000     0.000  1.0000  0.0000  0.0000
    47 H(1)   Bbb     0.0000     0.000     0.000     0.000  0.0000  1.0000  0.0000
              Bcc     0.0000     0.000     0.000     0.000  0.0000  0.0000  1.0000
 
              Baa     0.0000     0.000     0.000     0.000  1.0000  0.0000  0.0000
    48 H(1)   Bbb     0.0000     0.000     0.000     0.000  0.0000  1.0000  0.0000
              Bcc     0.0000     0.000     0.000     0.000  0.0000  0.0000  1.0000
 
              Baa     0.0000     0.000     0.000     0.000  1.0000  0.0000  0.0000
    49 H(1)   Bbb     0.0000     0.000     0.000     0.000  0.0000  1.0000  0.0000
              Bcc     0.0000     0.000     0.000     0.000  0.0000  0.0000  1.0000
 
              Baa     0.0000     0.000     0.000     0.000  1.0000  0.0000  0.0000
    50 H(1)   Bbb     0.0000     0.000     0.000     0.000  0.0000  1.0000  0.0000
              Bcc     0.0000     0.000     0.000     0.000  0.0000  0.0000  1.0000
 
              Baa     0.0000     0.000     0.000     0.000  1.0000  0.0000  0.0000
    51 H(1)   Bbb     0.0000     0.000     0.000     0.000  0.0000  1.0000  0.0000
              Bcc     0.0000     0.000     0.000     0.000  0.0000  0.0000  1.0000
 
              Baa     0.0000     0.000     0.000     0.000  1.0000  0.0000  0.0000
    52 H(1)   Bbb     0.0000     0.000     0.000     0.000  0.0000  1.0000  0.0000
              Bcc     0.0000     0.000     0.000     0.000  0.0000  0.0000  1.0000
 
              Baa     0.0000     0.000     0.000     0.000  1.0000  0.0000  0.0000
    53 H(1)   Bbb     0.0000     0.000     0.000     0.000  0.0000  1.0000  0.0000
              Bcc     0.0000     0.000     0.000     0.000  0.0000  0.0000  1.0000
 
              Baa     0.0000     0.000     0.000     0.000  1.0000  0.0000  0.0000
    54 H(1)   Bbb     0.0000     0.000     0.000     0.000  0.0000  1.0000  0.0000
              Bcc     0.0000     0.000     0.000     0.000  0.0000  0.0000  1.0000
 
              Baa     0.0000     0.000     0.000     0.000  1.0000  0.0000  0.0000
    55 H(1)   Bbb     0.0000     0.000     0.000     0.000  0.0000  1.0000  0.0000
              Bcc     0.0000     0.000     0.000     0.000  0.0000  0.0000  1.0000
 
              Baa     0.0000     0.000     0.000     0.000  1.0000  0.0000  0.0000
    56 H(1)   Bbb     0.0000     0.000     0.000     0.000  0.0000  1.0000  0.0000
              Bcc     0.0000     0.000     0.000     0.000  0.0000  0.0000  1.0000
 
              Baa     0.0000     0.000     0.000     0.000  1.0000  0.0000  0.0000
    57 H(1)   Bbb     0.0000     0.000     0.000     0.000  0.0000  1.0000  0.0000
              Bcc     0.0000     0.000     0.000     0.000  0.0000  0.0000  1.0000
 
              Baa     0.0000     0.000     0.000     0.000  1.0000  0.0000  0.0000
    58 H(1)   Bbb     0.0000     0.000     0.000     0.000  0.0000  1.0000  0.0000
              Bcc     0.0000     0.000     0.000     0.000  0.0000  0.0000  1.0000
 
              Baa     0.0000     0.000     0.000     0.000  1.0000  0.0000  0.0000
    59 H(1)   Bbb     0.0000     0.000     0.000     0.000  0.0000  1.0000  0.0000
              Bcc     0.0000     0.000     0.000     0.000  0.0000  0.0000  1.0000
 
              Baa     0.0000     0.000     0.000     0.000  1.0000  0.0000  0.0000
    60 H(1)   Bbb     0.0000     0.000     0.000     0.000  0.0000  1.0000  0.0000
              Bcc     0.0000     0.000     0.000     0.000  0.0000  0.0000  1.0000
 
              Baa     0.0000     0.000     0.000     0.000  1.0000  0.0000  0.0000
    61 H(1)   Bbb     0.0000     0.000     0.000     0.000  0.0000  1.0000  0.0000
              Bcc     0.0000     0.000     0.000     0.000  0.0000  0.0000  1.0000
 
              Baa     0.0000     0.000     0.000     0.000  1.0000  0.0000  0.0000
    62 H(1)   Bbb     0.0000     0.000     0.000     0.000  0.0000  1.0000  0.0000
              Bcc     0.0000     0.000     0.000     0.000  0.0000  0.0000  1.0000
 
              Baa     0.0000     0.000     0.000     0.000  1.0000  0.0000  0.0000
    63 H(1)   Bbb     0.0000     0.000     0.000     0.000  0.0000  1.0000  0.0000
              Bcc     0.0000     0.000     0.000     0.000  0.0000  0.0000  1.0000
 
              Baa     0.0000     0.000     0.000     0.000  1.0000  0.0000  0.0000
    64 O(17)  Bbb     0.0000     0.000     0.000     0.000  0.0000  1.0000  0.0000
              Bcc     0.0000     0.000     0.000     0.000  0.0000  0.0000  1.0000
 
              Baa     0.0000     0.000     0.000     0.000  1.0000  0.0000  0.0000
    65 H(1)   Bbb     0.0000     0.000     0.000     0.000  0.0000  1.0000  0.0000
              Bcc     0.0000     0.000     0.000     0.000  0.0000  0.0000  1.0000
 
              Baa     0.0000     0.000     0.000     0.000  1.0000  0.0000  0.0000
    66 H(1)   Bbb     0.0000     0.000     0.000     0.000  0.0000  1.0000  0.0000
              Bcc     0.0000     0.000     0.000     0.000  0.0000  0.0000  1.0000
 

 ---------------------------------------------------------------------------------

 No NMR shielding tensors so no spin-rotation constants.
 Leave Link  601 at Thu Oct 13 22:40:14 2016, MaxMem= 1342177280 cpu:      36.1
 (Enter /opt/software/g09/linda-exe/l701.exel)
 Compute integral first derivatives.
 ... and contract with generalized density number  0.
   1 Symmetry operations used in ECPInt.
 ECPInt:  NShTT=   28441 NPrTT=  163533 LenC2=   15576 LenP2D=   47850.
 LDataN:  DoStor=T MaxTD1= 5 Len=  102
 D1PCM: PCM CHGder 1st derivatives, ID1Alg=3 FixD1E=F DoIter=F DoCFld=F I1PDM=0.
 GePol: Maximum number of non-zero 1st derivatives   =     195
 Leave Link  701 at Thu Oct 13 22:40:26 2016, MaxMem= 1342177280 cpu:     213.9
 (Enter /opt/software/g09/l702.exe)
 L702 exits ... SP integral derivatives will be done elsewhere.
 Leave Link  702 at Thu Oct 13 22:40:26 2016, MaxMem= 1342177280 cpu:       0.3
 (Enter /opt/software/g09/linda-exe/l703.exel)
 Compute integral first derivatives, UseDBF=F ICtDFT=           0.
 Integral derivatives from FoFDir, PRISM(SPDF).
 Calling FoFJK, ICntrl=      2127 FMM=T ISym2X=0 I1Cent= 0 IOpClX= 1 NMat=1 NMatS=1 NMatT=0.
 FoFCou: FMM=T IPFlag=           0 FMFlag=      100000 FMFlg1=        2001
         NFxFlg=           0 DoJE=F BraDBF=F KetDBF=F FulRan=T
         Omega=  0.000000  0.000000  1.000000  0.000000  0.000000 ICntrl=    2127 IOpCl=  1
         NMat0=    1 NMatS0=    1 NMatT0=    0 NMatD0=    1 NMtDS0=    0 NMtDT0=    0
         I1Cent=           0 NGrid=           0.
 Symmetry not used in FoFCou.
 FMM levels:  10  Number of levels for PrismC:   9
 Leave Link  703 at Thu Oct 13 22:40:48 2016, MaxMem= 1342177280 cpu:     413.5
 (Enter /opt/software/g09/l716.exe)
 Dipole        =-1.76918980D+00-3.42842045D-01 1.24905648D+00
 ***** Axes restored to original set *****
 -------------------------------------------------------------------
 Center     Atomic                   Forces (Hartrees/Bohr)
 Number     Number              X              Y              Z
 -------------------------------------------------------------------
      1        8          -0.001203931    0.000171873    0.002470452
      2        6           0.001615395    0.000892139   -0.004212542
      3        6           0.012326864   -0.000821640    0.009889175
      4        6           0.001091139    0.000627198   -0.000514938
      5        6           0.000310241   -0.000961297    0.000195883
      6        8           0.001902066    0.000301342   -0.002849303
      7        6          -0.001767351    0.002137975    0.005500346
      8        6           0.008032608   -0.001701575   -0.011145102
      9        8          -0.005969984    0.000537740    0.004551738
     10        8          -0.000405390   -0.000517233   -0.003423403
     11        7           0.001016676   -0.002150310   -0.004204408
     12        7           0.010075704    0.003136395   -0.036064697
     13        7          -0.001277915   -0.002183934    0.029056400
     14        6          -0.007913360   -0.001684003    0.014026151
     15        6          -0.002735452   -0.000344510    0.003294516
     16        6           0.008615581   -0.000236443    0.005747497
     17        6          -0.000292226   -0.000051348    0.000630125
     18        6           0.000667077    0.000027624   -0.000147396
     19        6          -0.001576978   -0.000612068    0.004729312
     20        6          -0.008949056   -0.004401168    0.037206137
     21        7           0.002939214   -0.000557576    0.001359926
     22        6          -0.004209771    0.000976348    0.000062481
     23        6           0.001368383   -0.000353663   -0.000215794
     24        6          -0.000594422    0.000255935    0.000148067
     25        6           0.001564182   -0.000300345    0.001268542
     26        6           0.000425456   -0.000097928    0.000438048
     27        6          -0.000894366    0.000136026   -0.000377992
     28        6          -0.001956631    0.000236188   -0.000639281
     29        8          -0.000081941   -0.000471493   -0.000146917
     30        7           0.000431182    0.001871859    0.004862209
     31        7          -0.003242459   -0.000903364    0.002573959
     32        6           0.003395843   -0.000319722   -0.003270043
     33        6          -0.001031863    0.001051495    0.001936276
     34        6           0.001569877   -0.000223796   -0.000593252
     35        6          -0.000662834   -0.000076344   -0.000083450
     36        6          -0.000893788   -0.000404783   -0.001468437
     37        6           0.000744340    0.000585343    0.001995621
     38        6          -0.000597853   -0.001731544   -0.005966985
     39        8          -0.000539614    0.001298982    0.005133370
     40        1           0.000436356   -0.000771799   -0.000362027
     41        1          -0.000403347   -0.000086125    0.000052956
     42        1          -0.000225461   -0.000043921   -0.000631279
     43        1          -0.000017394   -0.000109829   -0.000008640
     44        1          -0.000678725    0.000093016    0.000316934
     45        1          -0.000274275    0.001467144    0.000403106
     46        1          -0.012102473    0.000336729   -0.003644416
     47        1          -0.003450297    0.000429476   -0.005748117
     48        1          -0.000331379   -0.000042095    0.000065026
     49        1          -0.000266246   -0.000041362    0.000252471
     50        1          -0.000660469    0.000078512   -0.000992924
     51        1           0.000996083    0.000209147    0.000506389
     52        1          -0.000321857    0.000083631   -0.000357524
     53        1           0.000142872   -0.000021755   -0.000094156
     54        1          -0.000013460    0.000043633   -0.000113977
     55        1           0.000136732    0.000082823    0.000070887
     56        1           0.001079370    0.000165145    0.001197722
     57        1          -0.000080581   -0.000524594    0.001075439
     58        1          -0.001045466    0.000305464    0.000882175
     59        1          -0.000263176    0.000120109    0.000316992
     60        1          -0.000001107    0.000038120    0.000145824
     61        1           0.000101172    0.000033591    0.000137522
     62        1          -0.000612642   -0.000015878   -0.000318686
     63        1           0.001655030   -0.000686126   -0.001323635
     64        8           0.003620813    0.004972211   -0.046525859
     65        1           0.009737224    0.000187802    0.001463375
     66        1          -0.008451939    0.000558552   -0.008517867
 -------------------------------------------------------------------
 Cartesian Forces:  Max     0.046525859 RMS     0.006211189
 Leave Link  716 at Thu Oct 13 22:40:48 2016, MaxMem= 1342177280 cpu:       0.4
 (Enter /opt/software/g09/l103.exe)

 GradGradGradGradGradGradGradGradGradGradGradGradGradGradGradGradGradGrad
 Berny optimization.
 Internal  Forces:  Max     0.047051752 RMS     0.004381110
 Search for a local minimum.
 Step number   1 out of a maximum of  339
 All quantities printed in internal units (Hartrees-Bohrs-Radians)
 RMS Force = .43811D-02 SwitMx=.10000D-02 MixMth= 1
 Mixed Optimization -- RFO/linear search
 Second derivative matrix not updated -- first step.
 ITU=  0
     Eigenvalues ---    0.00230   0.00230   0.00424   0.00453   0.00615
     Eigenvalues ---    0.01021   0.01078   0.01218   0.01236   0.01295
     Eigenvalues ---    0.01309   0.01326   0.01395   0.01618   0.01707
     Eigenvalues ---    0.01736   0.01742   0.01802   0.01834   0.01858
     Eigenvalues ---    0.01883   0.01887   0.01920   0.01937   0.01940
     Eigenvalues ---    0.01990   0.02003   0.02012   0.02012   0.02033
     Eigenvalues ---    0.02088   0.02093   0.02098   0.02099   0.02103
     Eigenvalues ---    0.02108   0.02116   0.02118   0.02129   0.02130
     Eigenvalues ---    0.02134   0.02147   0.02159   0.02160   0.02163
     Eigenvalues ---    0.02166   0.02166   0.02184   0.02186   0.02188
     Eigenvalues ---    0.02189   0.02213   0.02262   0.02436   0.03137
     Eigenvalues ---    0.03155   0.03217   0.03875   0.04064   0.05141
     Eigenvalues ---    0.05358   0.05791   0.06032   0.07171   0.07256
     Eigenvalues ---    0.08693   0.09366   0.09492   0.12860   0.12953
     Eigenvalues ---    0.15736   0.15942   0.15999   0.16000   0.16000
     Eigenvalues ---    0.16000   0.16000   0.16000   0.16000   0.16000
     Eigenvalues ---    0.16000   0.16000   0.16000   0.16000   0.16000
     Eigenvalues ---    0.16000   0.16000   0.16000   0.16000   0.16000
     Eigenvalues ---    0.16134   0.16457   0.16652   0.17578   0.22000
     Eigenvalues ---    0.22000   0.22000   0.22000   0.22000   0.22001
     Eigenvalues ---    0.22025   0.22049   0.22101   0.22340   0.22485
     Eigenvalues ---    0.22485   0.22818   0.24196   0.24467   0.24468
     Eigenvalues ---    0.24471   0.24998   0.24998   0.24999   0.24999
     Eigenvalues ---    0.25000   0.25000   0.25000   0.25000   0.25000
     Eigenvalues ---    0.25000   0.25000   0.25000   0.25000   0.27113
     Eigenvalues ---    0.27346   0.27425   0.30016   0.30497   0.33793
     Eigenvalues ---    0.33940   0.33966   0.34122   0.34815   0.34969
     Eigenvalues ---    0.34974   0.35021   0.35056   0.35077   0.35153
     Eigenvalues ---    0.35221   0.35267   0.35288   0.35377   0.35379
     Eigenvalues ---    0.35391   0.35408   0.36415   0.37100   0.37230
     Eigenvalues ---    0.37275   0.38930   0.40648   0.40667   0.40989
     Eigenvalues ---    0.41150   0.41488   0.41539   0.41573   0.43734
     Eigenvalues ---    0.44190   0.44325   0.44359   0.44496   0.44942
     Eigenvalues ---    0.45508   0.45528   0.45693   0.46248   0.46299
     Eigenvalues ---    0.46474   0.46881   0.46953   0.47243   0.48100
     Eigenvalues ---    0.48921   0.49077   0.49915   0.52454   0.52611
     Eigenvalues ---    0.52822   0.53094   0.53586   0.54024   0.55473
     Eigenvalues ---    0.56284   0.69830   0.70159   0.71628   0.86855
     Eigenvalues ---    0.91549   0.95669
 RFO step:  Lambda=-2.06982745D-02 EMin= 2.30000000D-03
 Linear search not attempted -- first point.
 Iteration  1 RMS(Cart)=  0.11460055 RMS(Int)=  0.00269817
 Iteration  2 RMS(Cart)=  0.00831668 RMS(Int)=  0.00002760
 Iteration  3 RMS(Cart)=  0.00002011 RMS(Int)=  0.00002681
 Iteration  4 RMS(Cart)=  0.00000000 RMS(Int)=  0.00002681
 Variable       Old X    -DE/DX   Delta X   Delta X   Delta X     New X
                                 (Linear)    (Quad)   (Total)
    R1        2.69941  -0.00233   0.00000  -0.00529  -0.00530   2.69411
    R2        1.86583   0.00013   0.00000  -0.00005   0.00001   1.86584
    R3        2.93413  -0.00036   0.00000  -0.00121  -0.00121   2.93292
    R4        2.93646   0.00096   0.00000   0.00380   0.00374   2.94020
    R5        2.93591   0.00117   0.00000   0.00397   0.00397   2.93988
    R6        2.32227  -0.00246   0.00000  -0.00263  -0.00263   2.31964
    R7        2.57467  -0.00664   0.00000  -0.01219  -0.01219   2.56248
    R8        2.86506  -0.00024   0.00000  -0.00033  -0.00038   2.86468
    R9        2.07431  -0.00032   0.00000  -0.00088  -0.00088   2.07344
   R10        2.05717  -0.00061   0.00000  -0.00165  -0.00165   2.05552
   R11        2.87933  -0.00073   0.00000  -0.00229  -0.00229   2.87704
   R12        2.05976  -0.00001   0.00000  -0.00002  -0.00002   2.05974
   R13        2.07124  -0.00055   0.00000  -0.00151  -0.00151   2.06973
   R14        2.34380   0.00363   0.00000   0.00404   0.00405   2.34785
   R15        2.57120  -0.00148   0.00000  -0.00270  -0.00270   2.56850
   R16        2.30425   0.00751   0.00000   0.00768   0.00768   2.31193
   R17        2.61833  -0.00574   0.00000  -0.01144  -0.01144   2.60689
   R18        3.28306   0.00095   0.00000   0.00854   0.00860   3.29166
   R19        2.57318   0.00315   0.00000   0.00577   0.00577   2.57895
   R20        1.92927   0.00024   0.00000   0.00052   0.00052   1.92979
   R21        2.59951  -0.01236   0.00000  -0.02377  -0.02377   2.57574
   R22        1.91179   0.00790   0.00000   0.01654   0.01654   1.92834
   R23        2.43915  -0.01095   0.00000  -0.01523  -0.01523   2.42392
   R24        2.76737  -0.00053   0.00000  -0.00139  -0.00139   2.76599
   R25        2.05584   0.00670   0.00000   0.01806   0.01806   2.07390
   R26        2.66059   0.00141   0.00000   0.00305   0.00305   2.66364
   R27        2.67891  -0.00289   0.00000  -0.00672  -0.00672   2.67219
   R28        2.62818   0.00023   0.00000   0.00074   0.00074   2.62891
   R29        2.02201   0.01189   0.00000   0.03026   0.03026   2.05227
   R30        2.63743   0.00129   0.00000   0.00294   0.00294   2.64036
   R31        2.05067  -0.00019   0.00000  -0.00051  -0.00051   2.05016
   R32        2.63248   0.00039   0.00000   0.00078   0.00078   2.63327
   R33        2.05244  -0.00029   0.00000  -0.00079  -0.00079   2.05165
   R34        2.64608  -0.00331   0.00000  -0.00722  -0.00722   2.63886
   R35        2.05725  -0.00119   0.00000  -0.00322  -0.00322   2.05404
   R36        2.70231  -0.04705   0.00000  -0.10927  -0.10927   2.59304
   R37        2.42773   0.00307   0.00000   0.00417   0.00417   2.43190
   R38        2.75696   0.00110   0.00000   0.00281   0.00281   2.75977
   R39        2.07681  -0.00107   0.00000  -0.00299  -0.00299   2.07382
   R40        2.67901   0.00205   0.00000   0.00466   0.00466   2.68367
   R41        2.65966   0.00138   0.00000   0.00303   0.00303   2.66269
   R42        2.64491   0.00051   0.00000   0.00109   0.00109   2.64600
   R43        2.56411   0.00056   0.00000   0.00101   0.00101   2.56511
   R44        2.63215   0.00035   0.00000   0.00066   0.00066   2.63281
   R45        2.05641  -0.00048   0.00000  -0.00130  -0.00130   2.05510
   R46        2.63862   0.00123   0.00000   0.00246   0.00246   2.64108
   R47        2.05210  -0.00011   0.00000  -0.00030  -0.00030   2.05180
   R48        2.62688   0.00010   0.00000   0.00019   0.00019   2.62707
   R49        2.05018  -0.00002   0.00000  -0.00005  -0.00005   2.05013
   R50        2.05427  -0.00014   0.00000  -0.00037  -0.00037   2.05390
   R51        1.82709   0.00157   0.00000   0.00281   0.00281   1.82990
   R52        2.56866   0.00133   0.00000   0.00241   0.00241   2.57106
   R53        1.92566  -0.00075   0.00000  -0.00162  -0.00162   1.92404
   R54        2.43657   0.00194   0.00000   0.00268   0.00269   2.43926
   R55        3.33338  -0.00116   0.00000  -0.01321  -0.01318   3.32020
   R56        2.74479   0.00137   0.00000   0.00338   0.00335   2.74814
   R57        2.07388  -0.00140   0.00000  -0.00388  -0.00388   2.07000
   R58        2.66053   0.00045   0.00000   0.00092   0.00091   2.66145
   R59        2.68971  -0.00020   0.00000  -0.00060  -0.00065   2.68906
   R60        2.62244   0.00110   0.00000   0.00225   0.00225   2.62469
   R61        2.05550  -0.00041   0.00000  -0.00109  -0.00109   2.05441
   R62        2.64929   0.00027   0.00000   0.00066   0.00067   2.64996
   R63        2.05064  -0.00015   0.00000  -0.00040  -0.00040   2.05024
   R64        2.62628   0.00119   0.00000   0.00245   0.00246   2.62874
   R65        2.05317  -0.00015   0.00000  -0.00041  -0.00041   2.05277
   R66        2.65177  -0.00010   0.00000  -0.00027  -0.00027   2.65150
   R67        2.05045   0.00032   0.00000   0.00085   0.00085   2.05129
   R68        2.53927   0.00420   0.00000   0.00717   0.00716   2.54643
   R69        1.86910   0.00022   0.00000   0.00047   0.00050   1.86960
   R70        1.81414   0.00824   0.00000   0.01432   0.01432   1.82845
    A1        1.84780   0.00020   0.00000   0.00204   0.00198   1.84978
    A2        1.91493   0.00178   0.00000   0.00845   0.00845   1.92338
    A3        1.94458  -0.00085   0.00000  -0.00040  -0.00048   1.94411
    A4        1.91981  -0.00093   0.00000  -0.00304  -0.00305   1.91676
    A5        1.85321  -0.00133   0.00000  -0.00968  -0.00960   1.84361
    A6        1.85788  -0.00155   0.00000  -0.01130  -0.01127   1.84661
    A7        1.96976   0.00288   0.00000   0.01537   0.01536   1.98511
    A8        2.10154   0.00252   0.00000   0.00929   0.00929   2.11083
    A9        1.97708   0.00055   0.00000   0.00203   0.00203   1.97911
   A10        2.20450  -0.00307   0.00000  -0.01135  -0.01135   2.19315
   A11        1.96671   0.00267   0.00000   0.01388   0.01370   1.98042
   A12        1.88487  -0.00080   0.00000  -0.00588  -0.00581   1.87905
   A13        1.92735  -0.00044   0.00000   0.00133   0.00134   1.92869
   A14        1.85076  -0.00121   0.00000  -0.00907  -0.00901   1.84175
   A15        1.95167  -0.00075   0.00000  -0.00082  -0.00082   1.95085
   A16        1.87743   0.00040   0.00000  -0.00079  -0.00082   1.87661
   A17        1.99718   0.00247   0.00000   0.01104   0.01104   2.00822
   A18        1.90787  -0.00066   0.00000  -0.00034  -0.00037   1.90749
   A19        1.86982  -0.00027   0.00000  -0.00095  -0.00092   1.86890
   A20        1.88260  -0.00044   0.00000   0.00086   0.00082   1.88342
   A21        1.91308  -0.00140   0.00000  -0.00929  -0.00929   1.90379
   A22        1.89103   0.00022   0.00000  -0.00193  -0.00194   1.88909
   A23        2.12368  -0.00173   0.00000  -0.00552  -0.00567   2.11801
   A24        2.07109   0.00093   0.00000   0.00278   0.00277   2.07386
   A25        2.08799   0.00078   0.00000   0.00220   0.00219   2.09019
   A26        2.15947  -0.00007   0.00000  -0.00029  -0.00036   2.15911
   A27        1.97258   0.00106   0.00000   0.00386   0.00380   1.97638
   A28        2.15109  -0.00100   0.00000  -0.00374  -0.00380   2.14729
   A29        2.13525   0.00114   0.00000   0.00534   0.00524   2.14049
   A30        2.02071   0.00036   0.00000   0.00370   0.00360   2.02431
   A31        2.11863  -0.00136   0.00000  -0.00589  -0.00599   2.11264
   A32        2.29387  -0.03393   0.00000  -0.14092  -0.14092   2.15294
   A33        2.01037   0.00754   0.00000   0.01836   0.01836   2.02873
   A34        1.97876   0.02638   0.00000   0.12265   0.12265   2.10141
   A35        2.08408  -0.03080   0.00000  -0.11379  -0.11379   1.97029
   A36        2.14264   0.00818   0.00000   0.03398   0.03398   2.17662
   A37        2.12368  -0.00451   0.00000  -0.01931  -0.01931   2.10437
   A38        2.01686  -0.00367   0.00000  -0.01466  -0.01466   2.00219
   A39        2.03334  -0.00142   0.00000  -0.00508  -0.00508   2.02826
   A40        2.19902   0.00270   0.00000   0.01014   0.01014   2.20915
   A41        2.05083  -0.00128   0.00000  -0.00506  -0.00506   2.04577
   A42        2.13895  -0.00099   0.00000  -0.00337  -0.00338   2.13557
   A43        2.07212  -0.00121   0.00000  -0.00777  -0.00776   2.06435
   A44        2.07212   0.00221   0.00000   0.01114   0.01114   2.08326
   A45        2.07755   0.00042   0.00000   0.00306   0.00304   2.08059
   A46        2.10011  -0.00050   0.00000  -0.00312  -0.00311   2.09701
   A47        2.10552   0.00008   0.00000   0.00006   0.00007   2.10559
   A48        2.09344  -0.00025   0.00000  -0.00034  -0.00035   2.09309
   A49        2.10354   0.00036   0.00000   0.00145   0.00146   2.10500
   A50        2.08620  -0.00010   0.00000  -0.00111  -0.00111   2.08510
   A51        2.11293  -0.00171   0.00000  -0.00752  -0.00751   2.10542
   A52        2.09467   0.00078   0.00000   0.00337   0.00336   2.09804
   A53        2.07559   0.00093   0.00000   0.00415   0.00415   2.07973
   A54        2.09267   0.00382   0.00000   0.01324   0.01325   2.10592
   A55        2.09526  -0.00330   0.00000  -0.01175  -0.01176   2.08350
   A56        2.09526  -0.00052   0.00000  -0.00149  -0.00150   2.09376
   A57        2.03562  -0.00306   0.00000  -0.01132  -0.01132   2.02430
   A58        2.17340   0.00243   0.00000   0.01011   0.01010   2.18350
   A59        2.10364  -0.00118   0.00000  -0.00487  -0.00487   2.09877
   A60        2.00613  -0.00125   0.00000  -0.00520  -0.00521   2.00092
   A61        2.17739   0.00328   0.00000   0.01197   0.01197   2.18936
   A62        2.04868  -0.00301   0.00000  -0.01127  -0.01127   2.03740
   A63        2.05708  -0.00026   0.00000  -0.00068  -0.00068   2.05640
   A64        2.09047   0.00011   0.00000   0.00059   0.00059   2.09105
   A65        2.07389   0.00175   0.00000   0.00635   0.00635   2.08025
   A66        2.11882  -0.00185   0.00000  -0.00694  -0.00694   2.11188
   A67        2.11054  -0.00024   0.00000  -0.00110  -0.00110   2.10944
   A68        2.07658   0.00004   0.00000   0.00011   0.00011   2.07670
   A69        2.09606   0.00020   0.00000   0.00098   0.00098   2.09704
   A70        2.09647   0.00040   0.00000   0.00135   0.00135   2.09782
   A71        2.08519  -0.00033   0.00000  -0.00141  -0.00141   2.08378
   A72        2.10152  -0.00007   0.00000   0.00006   0.00006   2.10158
   A73        2.07814   0.00010   0.00000   0.00019   0.00019   2.07832
   A74        2.10534   0.00007   0.00000   0.00055   0.00055   2.10589
   A75        2.09971  -0.00016   0.00000  -0.00073  -0.00073   2.09898
   A76        2.13368  -0.00010   0.00000  -0.00035  -0.00035   2.13333
   A77        2.06230   0.00004   0.00000   0.00013   0.00013   2.06243
   A78        2.08720   0.00006   0.00000   0.00022   0.00022   2.08743
   A79        1.90315  -0.00010   0.00000  -0.00055  -0.00055   1.90260
   A80        2.08312   0.00125   0.00000   0.00553   0.00552   2.08864
   A81        2.07510  -0.00143   0.00000  -0.00662  -0.00664   2.06846
   A82        2.08754   0.00027   0.00000   0.00297   0.00296   2.09050
   A83        2.08097  -0.00218   0.00000  -0.00806  -0.00806   2.07292
   A84        2.11045  -0.00013   0.00000  -0.00070  -0.00077   2.10969
   A85        2.11971  -0.00002   0.00000  -0.00015  -0.00013   2.11958
   A86        2.05302   0.00015   0.00000   0.00082   0.00084   2.05386
   A87        2.08780  -0.00089   0.00000  -0.00303  -0.00297   2.08484
   A88        2.12038   0.00131   0.00000   0.00475   0.00466   2.12504
   A89        2.07498  -0.00042   0.00000  -0.00170  -0.00168   2.07330
   A90        2.12023  -0.00017   0.00000  -0.00071  -0.00072   2.11950
   A91        2.06758  -0.00005   0.00000  -0.00040  -0.00039   2.06719
   A92        2.09538   0.00022   0.00000   0.00111   0.00111   2.09649
   A93        2.07841   0.00035   0.00000   0.00172   0.00172   2.08013
   A94        2.10121  -0.00016   0.00000  -0.00080  -0.00080   2.10041
   A95        2.10357  -0.00018   0.00000  -0.00092  -0.00092   2.10265
   A96        2.10824  -0.00039   0.00000  -0.00133  -0.00133   2.10691
   A97        2.09219   0.00028   0.00000   0.00114   0.00114   2.09332
   A98        2.08275   0.00011   0.00000   0.00020   0.00020   2.08295
   A99        2.10410  -0.00036   0.00000  -0.00150  -0.00152   2.10258
   A100       2.12100  -0.00045   0.00000  -0.00272  -0.00272   2.11828
   A101       2.05809   0.00081   0.00000   0.00423   0.00423   2.06232
   A102       2.08041   0.00100   0.00000   0.00352   0.00353   2.08395
   A103       2.14308  -0.00153   0.00000  -0.00572  -0.00579   2.13729
   A104       2.05969   0.00053   0.00000   0.00221   0.00226   2.06195
   A105       1.89904  -0.00226   0.00000  -0.01267  -0.01271   1.88633
   A106       1.91114  -0.00977   0.00000  -0.05407  -0.05407   1.85707
    D1       -2.48162  -0.00038   0.00000  -0.00864  -0.00865  -2.49027
    D2       -0.43445  -0.00142   0.00000  -0.01554  -0.01550  -0.44995
    D3        1.76343   0.00100   0.00000   0.00189   0.00187   1.76529
    D4       -3.04892   0.00014   0.00000   0.00494   0.00492  -3.04400
    D5        0.10415   0.00023   0.00000   0.00735   0.00734   0.11148
    D6        1.13074   0.00096   0.00000   0.00648   0.00654   1.13729
    D7       -1.99937   0.00105   0.00000   0.00888   0.00896  -1.99041
    D8       -0.97223  -0.00090   0.00000  -0.00063  -0.00069  -0.97292
    D9        2.18083  -0.00081   0.00000   0.00178   0.00173   2.18256
   D10        0.85909  -0.00082   0.00000  -0.01414  -0.01418   0.84491
   D11       -1.17921  -0.00037   0.00000  -0.00727  -0.00725  -1.18647
   D12        3.05555  -0.00013   0.00000  -0.00361  -0.00361   3.05195
   D13        2.94332   0.00004   0.00000  -0.01010  -0.01012   2.93320
   D14        0.90501   0.00049   0.00000  -0.00323  -0.00319   0.90182
   D15       -1.14340   0.00074   0.00000   0.00043   0.00045  -1.14295
   D16       -1.31092  -0.00112   0.00000  -0.02152  -0.02159  -1.33251
   D17        2.93396  -0.00067   0.00000  -0.01465  -0.01466   2.91929
   D18        0.88554  -0.00043   0.00000  -0.01099  -0.01102   0.87452
   D19       -1.08768   0.00073   0.00000   0.01321   0.01325  -1.07443
   D20        3.08227   0.00010   0.00000   0.00481   0.00484   3.08711
   D21        1.03677   0.00034   0.00000   0.00780   0.00784   1.04461
   D22        3.12201   0.00000   0.00000   0.01131   0.01128   3.13329
   D23        1.00878  -0.00063   0.00000   0.00291   0.00287   1.01165
   D24       -1.03672  -0.00039   0.00000   0.00590   0.00587  -1.03086
   D25        1.09585   0.00103   0.00000   0.02174   0.02174   1.11758
   D26       -1.01739   0.00040   0.00000   0.01334   0.01333  -1.00406
   D27       -3.06289   0.00064   0.00000   0.01632   0.01633  -3.04656
   D28       -3.13630  -0.00013   0.00000  -0.00382  -0.00378  -3.14008
   D29       -0.01717   0.00016   0.00000   0.00338   0.00336  -0.01381
   D30        0.01757  -0.00008   0.00000  -0.00141  -0.00139   0.01618
   D31        3.13670   0.00021   0.00000   0.00579   0.00575  -3.14073
   D32       -0.75262   0.00043   0.00000   0.00871   0.00877  -0.74385
   D33        2.42050   0.00105   0.00000   0.02846   0.02847   2.44897
   D34        1.30585   0.00017   0.00000   0.00349   0.00348   1.30933
   D35       -1.80421   0.00078   0.00000   0.02324   0.02318  -1.78103
   D36       -2.93589  -0.00047   0.00000  -0.00329  -0.00325  -2.93915
   D37        0.23723   0.00015   0.00000   0.01646   0.01645   0.25368
   D38       -1.84092  -0.00037   0.00000  -0.01269  -0.01272  -1.85364
   D39        1.31025   0.00026   0.00000   0.00748   0.00747   1.31772
   D40        0.28620   0.00010   0.00000  -0.00519  -0.00520   0.28100
   D41       -2.84582   0.00073   0.00000   0.01499   0.01500  -2.83083
   D42        2.34170  -0.00067   0.00000  -0.01214  -0.01213   2.32957
   D43       -0.79033  -0.00004   0.00000   0.00804   0.00807  -0.78226
   D44       -0.07049  -0.00048   0.00000  -0.01270  -0.01269  -0.08318
   D45       -3.07321  -0.00149   0.00000  -0.03747  -0.03753  -3.11074
   D46        3.10197   0.00017   0.00000   0.00678   0.00683   3.10881
   D47        0.09925  -0.00084   0.00000  -0.01800  -0.01800   0.08125
   D48       -3.04993  -0.00096   0.00000  -0.02505  -0.02503  -3.07496
   D49       -0.19981  -0.00054   0.00000  -0.01746  -0.01745  -0.21726
   D50        0.10118  -0.00034   0.00000  -0.00500  -0.00501   0.09617
   D51        2.95130   0.00007   0.00000   0.00259   0.00257   2.95386
   D52       -3.03267  -0.00121   0.00000  -0.02904  -0.02899  -3.06167
   D53       -0.03762   0.00000   0.00000  -0.00208  -0.00212  -0.03974
   D54        3.14159  -0.00011   0.00000  -0.00150  -0.00145   3.14015
   D55        0.02214  -0.00022   0.00000  -0.00761  -0.00766   0.01448
   D56        3.13821   0.00032   0.00000   0.00649   0.00648  -3.13850
   D57       -0.00146   0.00017   0.00000   0.00277   0.00277   0.00131
   D58       -3.13973  -0.00003   0.00000  -0.00036  -0.00036  -3.14009
   D59        0.00038   0.00000   0.00000   0.00029   0.00028   0.00066
   D60        0.00005   0.00012   0.00000   0.00314   0.00314   0.00319
   D61        3.14015   0.00014   0.00000   0.00379   0.00379  -3.13924
   D62        3.14009   0.00001   0.00000   0.00031   0.00031   3.14040
   D63       -0.00150   0.00001   0.00000   0.00016   0.00016  -0.00134
   D64       -0.00014  -0.00001   0.00000  -0.00029  -0.00029  -0.00043
   D65        3.14145  -0.00002   0.00000  -0.00044  -0.00044   3.14101
   D66       -3.13985   0.00000   0.00000   0.00007   0.00007  -3.13978
   D67        0.00174  -0.00004   0.00000  -0.00095  -0.00095   0.00079
   D68        0.00024   0.00003   0.00000   0.00072   0.00073   0.00097
   D69       -3.14135  -0.00001   0.00000  -0.00030  -0.00030   3.14153
   D70       -0.00007  -0.00001   0.00000  -0.00013  -0.00013  -0.00019
   D71       -3.14113  -0.00001   0.00000  -0.00028  -0.00028  -3.14141
   D72        3.14153   0.00000   0.00000   0.00002   0.00002   3.14155
   D73        0.00046  -0.00001   0.00000  -0.00013  -0.00013   0.00033
   D74        0.00018   0.00000   0.00000   0.00012   0.00012   0.00030
   D75       -3.14124   0.00000   0.00000   0.00008   0.00007  -3.14116
   D76        3.14125   0.00001   0.00000   0.00027   0.00027   3.14152
   D77       -0.00017   0.00001   0.00000   0.00023   0.00023   0.00005
   D78       -0.00009   0.00001   0.00000   0.00032   0.00032   0.00023
   D79       -3.14149   0.00000   0.00000   0.00006   0.00006  -3.14143
   D80        3.14134   0.00001   0.00000   0.00037   0.00036  -3.14148
   D81       -0.00007   0.00000   0.00000   0.00011   0.00011   0.00004
   D82       -0.00013  -0.00003   0.00000  -0.00075  -0.00076  -0.00089
   D83        3.14146   0.00001   0.00000   0.00027   0.00028  -3.14145
   D84        3.14128  -0.00002   0.00000  -0.00050  -0.00050   3.14078
   D85       -0.00032   0.00002   0.00000   0.00053   0.00053   0.00022
   D86        3.10326   0.00033   0.00000   0.00960   0.00960   3.11285
   D87       -0.03834   0.00029   0.00000   0.00858   0.00858  -0.02976
   D88        3.13820  -0.00017   0.00000  -0.00241  -0.00241   3.13579
   D89        0.00344  -0.00044   0.00000  -0.00900  -0.00900  -0.00556
   D90       -0.02010  -0.00010   0.00000  -0.00235  -0.00235  -0.02246
   D91        3.13069  -0.00017   0.00000  -0.00419  -0.00419   3.12650
   D92        3.11499   0.00016   0.00000   0.00391   0.00391   3.11891
   D93       -0.01740   0.00009   0.00000   0.00207   0.00207  -0.01533
   D94       -3.13145  -0.00010   0.00000  -0.00288  -0.00289  -3.13434
   D95        0.01045  -0.00008   0.00000  -0.00221  -0.00222   0.00823
   D96        0.00090  -0.00005   0.00000  -0.00108  -0.00108  -0.00018
   D97       -3.14039  -0.00002   0.00000  -0.00041  -0.00041  -3.14080
   D98        3.13317   0.00010   0.00000   0.00223   0.00221   3.13539
   D99       -0.00452   0.00002   0.00000   0.00022   0.00021  -0.00431
   D100       0.00013   0.00002   0.00000   0.00044   0.00044   0.00057
   D101      -3.13756  -0.00007   0.00000  -0.00156  -0.00156  -3.13912
   D102      -0.00108   0.00005   0.00000   0.00110   0.00110   0.00002
   D103       3.14005   0.00004   0.00000   0.00101   0.00101   3.14106
   D104       3.14020   0.00002   0.00000   0.00041   0.00041   3.14061
   D105      -0.00185   0.00002   0.00000   0.00032   0.00032  -0.00153
   D106      -3.10430  -0.00034   0.00000  -0.00783  -0.00783  -3.11213
   D107       0.03760  -0.00031   0.00000  -0.00715  -0.00715   0.03046
   D108       0.00020  -0.00002   0.00000  -0.00043  -0.00043  -0.00022
   D109       3.14096   0.00001   0.00000   0.00018   0.00018   3.14113
   D110      -3.14092  -0.00001   0.00000  -0.00033  -0.00033  -3.14126
   D111      -0.00017   0.00001   0.00000   0.00027   0.00027   0.00010
   D112       0.00083  -0.00001   0.00000  -0.00023  -0.00023   0.00059
   D113       3.13996   0.00005   0.00000   0.00114   0.00114   3.14110
   D114      -3.13992  -0.00004   0.00000  -0.00084  -0.00084  -3.14076
   D115      -0.00079   0.00002   0.00000   0.00053   0.00053  -0.00026
   D116      -0.00100   0.00001   0.00000   0.00022   0.00022  -0.00078
   D117       3.13665   0.00010   0.00000   0.00225   0.00224   3.13889
   D118      -3.14014  -0.00005   0.00000  -0.00115  -0.00115  -3.14129
   D119      -0.00250   0.00004   0.00000   0.00088   0.00088  -0.00162
   D120       3.14159  -0.00155   0.00000  -0.03837  -0.03836   3.10324
   D121       0.29357  -0.00168   0.00000  -0.04441  -0.04443   0.24915
   D122      -3.14072  -0.00024   0.00000  -0.00383  -0.00383   3.13863
   D123      -0.00402  -0.00053   0.00000  -0.01086  -0.01086  -0.01489
   D124      -3.12830  -0.00049   0.00000  -0.01379  -0.01379   3.14110
   D125       0.02089  -0.00059   0.00000  -0.01626  -0.01626   0.00463
   D126       0.01801  -0.00022   0.00000  -0.00701  -0.00701   0.01100
   D127      -3.11598  -0.00031   0.00000  -0.00949  -0.00949  -3.12547
   D128      -3.13614  -0.00001   0.00000  -0.00012  -0.00012  -3.13626
   D129       0.00524  -0.00004   0.00000  -0.00082  -0.00082   0.00442
   D130      -0.00195   0.00009   0.00000   0.00232   0.00232   0.00037
   D131       3.13943   0.00006   0.00000   0.00162   0.00162   3.14105
   D132       3.13545  -0.00004   0.00000  -0.00103  -0.00103   3.13443
   D133      -0.00339  -0.00023   0.00000  -0.00549  -0.00548  -0.00888
   D134       0.00140  -0.00013   0.00000  -0.00348  -0.00348  -0.00208
   D135      -3.13744  -0.00032   0.00000  -0.00795  -0.00794   3.13780
   D136       0.00094   0.00001   0.00000   0.00019   0.00019   0.00112
   D137      -3.14083  -0.00002   0.00000  -0.00048  -0.00048  -3.14131
   D138      -3.14044   0.00004   0.00000   0.00090   0.00090  -3.13954
   D139       0.00097   0.00001   0.00000   0.00023   0.00023   0.00120
   D140       0.00064  -0.00006   0.00000  -0.00154  -0.00154  -0.00090
   D141      -3.14112  -0.00001   0.00000  -0.00029  -0.00029  -3.14141
   D142      -3.14078  -0.00003   0.00000  -0.00087  -0.00087   3.14154
   D143       0.00065   0.00002   0.00000   0.00038   0.00038   0.00103
   D144      -0.00116   0.00001   0.00000   0.00033   0.00033  -0.00083
   D145       3.14128   0.00009   0.00000   0.00218   0.00218  -3.13972
   D146       3.14060  -0.00004   0.00000  -0.00092  -0.00092   3.13968
   D147      -0.00014   0.00004   0.00000   0.00094   0.00094   0.00079
   D148       0.00012   0.00009   0.00000   0.00220   0.00220   0.00233
   D149       3.13910   0.00026   0.00000   0.00645   0.00646  -3.13763
   D150       3.14089   0.00001   0.00000   0.00041   0.00041   3.14130
   D151      -0.00332   0.00018   0.00000   0.00465   0.00466   0.00134
   D152      -0.00801  -0.00006   0.00000  -0.00112  -0.00113  -0.00914
   D153       3.13630  -0.00024   0.00000  -0.00554  -0.00554   3.13076
         Item               Value     Threshold  Converged?
 Maximum Force            0.047052     0.000450     NO 
 RMS     Force            0.004381     0.000300     NO 
 Maximum Displacement     0.623776     0.001800     NO 
 RMS     Displacement     0.118254     0.001200     NO 
 Predicted change in Energy=-1.123881D-02
 GradGradGradGradGradGradGradGradGradGradGradGradGradGradGradGradGradGrad

 Leave Link  103 at Thu Oct 13 22:40:57 2016, MaxMem= 1342177280 cpu:     154.0
 (Enter /opt/software/g09/l202.exe)
 Stoichiometry    C27H26N6O7
 Framework group  C1[X(C27H26N6O7)]
 Deg. of freedom   192
 Full point group                 C1      NOp   1
 Largest Abelian subgroup         C1      NOp   1
 Largest concise Abelian subgroup C1      NOp   1
                         Standard orientation:                         
 ---------------------------------------------------------------------
 Center     Atomic      Atomic             Coordinates (Angstroms)
 Number     Number       Type             X           Y           Z
 ---------------------------------------------------------------------
      1          8           0       -0.987244   -1.352579    0.550180
      2          6           0       -0.898926   -0.113027   -0.148551
      3          6           0       -2.316669    0.386921   -0.534393
      4          6           0       -0.291029    1.002573    0.749604
      5          6           0       -0.141610   -0.317531   -1.492019
      6          8           0       -2.465465    1.386153   -1.231643
      7          6           0        0.977777    0.578980    1.462848
      8          6           0        1.295256   -0.801855   -1.355145
      9          8           0        2.272454   -0.090285   -1.543600
     10          8           0        1.079444   -0.541139    1.990707
     11          7           0        1.996930    1.471543    1.572672
     12          7           0       -3.314458   -0.370557   -0.015361
     13          7           0       -4.636591   -0.115450   -0.226833
     14          6           0       -5.406981   -0.958918    0.356552
     15          6           0       -6.869270   -0.930677    0.298929
     16          6           0       -7.540063   -1.946073    1.010128
     17          6           0       -8.927673   -2.039626    1.043498
     18          6           0       -9.691470   -1.097257    0.350116
     19          6           0       -9.060490   -0.080169   -0.363423
     20          6           0       -7.667235    0.008738   -0.394127
     21          7           0        1.963468    2.702949    0.985314
     22          6           0        3.033564    3.409308    1.095223
     23          6           0        3.217567    4.747179    0.539313
     24          6           0        2.257186    5.459999   -0.226415
     25          6           0        2.562400    6.737919   -0.710493
     26          6           0        3.799641    7.323682   -0.451294
     27          6           0        4.758088    6.638518    0.300510
     28          6           0        4.458245    5.369374    0.782158
     29          8           0        1.052260    4.887070   -0.476294
     30          7           0        1.390275   -2.139612   -1.032018
     31          7           0        2.612206   -2.691511   -0.800972
     32          6           0        2.677804   -3.934175   -0.457965
     33          6           0        3.959977   -4.571463   -0.203509
     34          6           0        3.996609   -5.929016    0.169628
     35          6           0        5.197524   -6.577027    0.428482
     36          6           0        6.398445   -5.861692    0.316546
     37          6           0        6.394661   -4.519740   -0.049808
     38          6           0        5.186146   -3.858052   -0.315102
     39          8           0        5.237414   -2.559315   -0.670695
     40          1           0       -0.287857   -1.322632    1.246484
     41          1           0       -1.015299    1.221870    1.544100
     42          1           0       -0.146340    1.916067    0.177100
     43          1           0       -0.127472    0.622182   -2.044074
     44          1           0       -0.711940   -1.048820   -2.074705
     45          1           0        2.841100    1.131930    2.036240
     46          1           0       -3.026645   -1.172290    0.546482
     47          1           0       -4.986957   -1.779551    0.952005
     48          1           0       -9.406808   -2.836244    1.602811
     49          1           0      -10.775890   -1.148544    0.361057
     50          1           0       -9.650172    0.655454   -0.904342
     51          1           0        3.901485    3.016895    1.640250
     52          1           0        1.817250    7.271591   -1.295842
     53          1           0        4.011205    8.315675   -0.838698
     54          1           0        5.724069    7.087338    0.506450
     55          1           0        5.198297    4.827888    1.365614
     56          1           0        0.527056    5.484917   -1.028042
     57          1           0        0.549629   -2.627173   -0.728294
     58          1           0        1.774613   -4.542128   -0.337420
     59          1           0        3.056473   -6.468432    0.253660
     60          1           0        5.205091   -7.623572    0.714454
     61          1           0        7.344746   -6.356391    0.516007
     62          1           0        7.318007   -3.956391   -0.141320
     63          1           0        4.312016   -2.247966   -0.830424
     64          8           0       -7.060198    1.016049   -1.101019
     65          1           0       -7.770664    1.525013   -1.516223
     66          1           0       -6.943968   -2.677205    1.548218
 ---------------------------------------------------------------------
 Rotational constants (GHZ):      0.0725824      0.0423402      0.0280203
 Leave Link  202 at Thu Oct 13 22:40:57 2016, MaxMem= 1342177280 cpu:       0.5
 (Enter /opt/software/g09/l301.exe)
 Basis read from rwf:  (5D, 7F)
 Pseudo-potential data read from rwf file.
 There are   690 symmetry adapted basis functions of A   symmetry.
 Integral buffers will be    131072 words long.
 Raffenetti 2 integral format.
 Two-electron integral symmetry is turned on.
   690 basis functions,  1302 primitive gaussians,   730 cartesian basis functions
   143 alpha electrons      143 beta electrons
       nuclear repulsion energy      4152.7424491082 Hartrees.
 IExCor=  402 DFT=T Ex+Corr=B3LYP ExCW=0 ScaHFX=  0.200000
 ScaDFX=  0.800000  0.720000  1.000000  0.810000 ScalE2=  1.000000  1.000000
 IRadAn=      0 IRanWt=     -1 IRanGd=            0 ICorTp=0
 NAtoms=   66 NActive=   66 NUniq=   66 SFac= 1.00D+00 NAtFMM=   50 NAOKFM=T Big=T
 No density basis found on file   724.
 ------------------------------------------------------------------------------
 Polarizable Continuum Model (PCM)
 =================================
 Model                : PCM.
 Atomic radii         : UFF (Universal Force Field).
 Polarization charges : Total charges.
 Charge compensation  : None.
 Solution method      : Matrix inversion.
 Cavity type          : Scaled VdW (van der Waals Surface) (Alpha=1.100).
 Cavity algorithm     : GePol (No added spheres)
                        Default sphere list used, NSphG=   66.
                        Lebedev-Laikov grids with approx.  5.0 points / Ang**2.
                        Smoothing algorithm: Karplus/York (Gamma=1.0000).
                        Polarization charges: spherical gaussians, with
                                              point-specific exponents (IZeta= 3).
                        Self-potential: point-specific (ISelfS= 7).
                        Self-field    : sphere-specific E.n sum rule (ISelfD= 2).
 1st derivatives      : Analytical E(r).r(x)/FMM algorithm (CHGder, D1EAlg=3).
                        Cavity 1st derivative terms included.
 Solvent              : Water, Eps=  78.355300 Eps(inf)=   1.777849
 ------------------------------------------------------------------------------
 GePol: Number of generator spheres                  =      66
 GePol: Total number of spheres                      =      66
 GePol: Number of exposed spheres                    =      66 (100.00%)
 GePol: Number of points                             =    4980
 GePol: Average weight of points                     =       0.13
 GePol: Minimum weight of points                     =   0.79D-11
 GePol: Maximum weight of points                     =    0.20577
 GePol: Number of points with low weight             =     314
 GePol: Fraction of low-weight points (<1% of avg)   =       6.31%
 GePol: Cavity surface area                          =    643.393 Ang**2
 GePol: Cavity volume                                =    713.714 Ang**3
 Leave Link  301 at Thu Oct 13 22:40:57 2016, MaxMem= 1342177280 cpu:       1.9
 (Enter /opt/software/g09/linda-exe/l302.exel)
 NPDir=0 NMtPBC=     1 NCelOv=     1 NCel=       1 NClECP=     1 NCelD=      1
         NCelK=      1 NCelE2=     1 NClLst=     1 CellRange=     0.0.
 One-electron integrals computed using PRISM.
   1 Symmetry operations used in ECPInt.
 ECPInt:  NShTT=   28441 NPrTT=  163533 LenC2=   15508 LenP2D=   47612.
 LDataN:  DoStor=T MaxTD1= 4 Len=   56
 NBasis=   690 RedAO= T  NBF=   690
 NBsUse=   690 1.00D-06 NBFU=   690
 Precomputing XC quadrature grid using
 IXCGrd= 2 IRadAn=           0 IRanWt=          -1 IRanGd=           0 AccXCQ= 0.00D+00.
 NRdTot=    4290 NPtTot=      549246 NUsed=      580147 NTot=      580179
 NSgBfM=   590   593   597   603   605 NAtAll=    66    66.
 Leave Link  302 at Thu Oct 13 22:41:03 2016, MaxMem= 1342177280 cpu:      91.1
 (Enter /opt/software/g09/l303.exe)
 DipDrv:  MaxL=1.
 Leave Link  303 at Thu Oct 13 22:41:03 2016, MaxMem= 1342177280 cpu:       4.1
 (Enter /opt/software/g09/linda-exe/l401.exel)
 Initial guess read from the read-write file.
 B after Tr=     0.000000    0.000000    0.000000
         Rot=    1.000000    0.000000    0.000000    0.000000 Ang=   0.00 deg.
 Guess basis will be translated and rotated to current coordinates.
 Initial guess orbital symmetries:
 Alpha Orbitals:
       Occupied  (A) (A) (A) (A) (A) (A) (A) (A) (A) (A) (A) (A)
                 (A) (A) (A) (A) (A) (A) (A) (A) (A) (A) (A) (A)
                 (A) (A) (A) (A) (A) (A) (A) (A) (A) (A) (A) (A)
                 (A) (A) (A) (A) (A) (A) (A) (A) (A) (A) (A) (A)
                 (A) (A) (A) (A) (A) (A) (A) (A) (A) (A) (A) (A)
                 (A) (A) (A) (A) (A) (A) (A) (A) (A) (A) (A) (A)
                 (A) (A) (A) (A) (A) (A) (A) (A) (A) (A) (A) (A)
                 (A) (A) (A) (A) (A) (A) (A) (A) (A) (A) (A) (A)
                 (A) (A) (A) (A) (A) (A) (A) (A) (A) (A) (A) (A)
                 (A) (A) (A) (A) (A) (A) (A) (A) (A) (A) (A) (A)
                 (A) (A) (A) (A) (A) (A) (A) (A) (A) (A) (A) (A)
                 (A) (A) (A) (A) (A) (A) (A) (A) (A) (A) (A)
       Virtual   (A) (A) (A) (A) (A) (A) (A) (A) (A) (A) (A) (A)
                 (A) (A) (A) (A) (A) (A) (A) (A) (A) (A) (A) (A)
                 (A) (A) (A) (A) (A) (A) (A) (A) (A) (A) (A) (A)
                 (A) (A) (A) (A) (A) (A) (A) (A) (A) (A) (A) (A)
                 (A) (A) (A) (A) (A) (A) (A) (A) (A) (A) (A) (A)
                 (A) (A) (A) (A) (A) (A) (A) (A) (A) (A) (A) (A)
                 (A) (A) (A) (A) (A) (A) (A) (A) (A) (A) (A) (A)
                 (A) (A) (A) (A) (A) (A) (A) (A) (A) (A) (A) (A)
                 (A) (A) (A) (A) (A) (A) (A) (A) (A) (A) (A) (A)
                 (A) (A) (A) (A) (A) (A) (A) (A) (A) (A) (A) (A)
                 (A) (A) (A) (A) (A) (A) (A) (A) (A) (A) (A) (A)
                 (A) (A) (A) (A) (A) (A) (A) (A) (A) (A) (A) (A)
                 (A) (A) (A) (A) (A) (A) (A) (A) (A) (A) (A) (A)
                 (A) (A) (A) (A) (A) (A) (A) (A) (A) (A) (A) (A)
                 (A) (A) (A) (A) (A) (A) (A) (A) (A) (A) (A) (A)
                 (A) (A) (A) (A) (A) (A) (A) (A) (A) (A) (A) (A)
                 (A) (A) (A) (A) (A) (A) (A) (A) (A) (A) (A) (A)
                 (A) (A) (A) (A) (A) (A) (A) (A) (A) (A) (A) (A)
                 (A) (A) (A) (A) (A) (A) (A) (A) (A) (A) (A) (A)
                 (A) (A) (A) (A) (A) (A) (A) (A) (A) (A) (A) (A)
                 (A) (A) (A) (A) (A) (A) (A) (A) (A) (A) (A) (A)
                 (A) (A) (A) (A) (A) (A) (A) (A) (A) (A) (A) (A)
                 (A) (A) (A) (A) (A) (A) (A) (A) (A) (A) (A) (A)
                 (A) (A) (A) (A) (A) (A) (A) (A) (A) (A) (A) (A)
                 (A) (A) (A) (A) (A) (A) (A) (A) (A) (A) (A) (A)
                 (A) (A) (A) (A) (A) (A) (A) (A) (A) (A) (A) (A)
                 (A) (A) (A) (A) (A) (A) (A) (A) (A) (A) (A) (A)
                 (A) (A) (A) (A) (A) (A) (A) (A) (A) (A) (A) (A)
                 (A) (A) (A) (A) (A) (A) (A) (A) (A) (A) (A) (A)
                 (A) (A) (A) (A) (A) (A) (A) (A) (A) (A) (A) (A)
                 (A) (A) (A) (A) (A) (A) (A) (A) (A) (A) (A) (A)
                 (A) (A) (A) (A) (A) (A) (A) (A) (A) (A) (A) (A)
                 (A) (A) (A) (A) (A) (A) (A) (A) (A) (A) (A) (A)
                 (A) (A) (A) (A) (A) (A) (A) (A) (A) (A) (A) (A)
                 (A) (A) (A) (A) (A) (A) (A) (A) (A) (A) (A) (A)
                 (A) (A) (A) (A) (A) (A) (A) (A) (A) (A) (A) (A)
                 (A) (A) (A) (A) (A) (A) (A) (A) (A) (A) (A) (A)
                 (A) (A) (A) (A) (A) (A) (A) (A) (A) (A) (A) (A)
                 (A) (A) (A) (A) (A) (A) (A) (A) (A) (A) (A) (A)
                 (A) (A) (A) (A) (A) (A) (A) (A) (A) (A) (A) (A)
                 (A) (A) (A) (A) (A) (A) (A) (A) (A) (A) (A) (A)
                 (A) (A) (A) (A) (A) (A) (A) (A) (A) (A) (A) (A)
                 (A) (A) (A) (A) (A) (A) (A) (A) (A) (A) (A) (A)
                 (A) (A) (A) (A) (A) (A) (A) (A) (A) (A) (A) (A)
                 (A) (A) (A) (A) (A) (A) (A) (A) (A) (A) (A) (A)
                 (A) (A) (A) (A) (A) (A) (A)
 Beta  Orbitals:
       Occupied  (A) (A) (A) (A) (A) (A) (A) (A) (A) (A) (A) (A)
                 (A) (A) (A) (A) (A) (A) (A) (A) (A) (A) (A) (A)
                 (A) (A) (A) (A) (A) (A) (A) (A) (A) (A) (A) (A)
                 (A) (A) (A) (A) (A) (A) (A) (A) (A) (A) (A) (A)
                 (A) (A) (A) (A) (A) (A) (A) (A) (A) (A) (A) (A)
                 (A) (A) (A) (A) (A) (A) (A) (A) (A) (A) (A) (A)
                 (A) (A) (A) (A) (A) (A) (A) (A) (A) (A) (A) (A)
                 (A) (A) (A) (A) (A) (A) (A) (A) (A) (A) (A) (A)
                 (A) (A) (A) (A) (A) (A) (A) (A) (A) (A) (A) (A)
                 (A) (A) (A) (A) (A) (A) (A) (A) (A) (A) (A) (A)
                 (A) (A) (A) (A) (A) (A) (A) (A) (A) (A) (A) (A)
                 (A) (A) (A) (A) (A) (A) (A) (A) (A) (A) (A)
       Virtual   (A) (A) (A) (A) (A) (A) (A) (A) (A) (A) (A) (A)
                 (A) (A) (A) (A) (A) (A) (A) (A) (A) (A) (A) (A)
                 (A) (A) (A) (A) (A) (A) (A) (A) (A) (A) (A) (A)
                 (A) (A) (A) (A) (A) (A) (A) (A) (A) (A) (A) (A)
                 (A) (A) (A) (A) (A) (A) (A) (A) (A) (A) (A) (A)
                 (A) (A) (A) (A) (A) (A) (A) (A) (A) (A) (A) (A)
                 (A) (A) (A) (A) (A) (A) (A) (A) (A) (A) (A) (A)
                 (A) (A) (A) (A) (A) (A) (A) (A) (A) (A) (A) (A)
                 (A) (A) (A) (A) (A) (A) (A) (A) (A) (A) (A) (A)
                 (A) (A) (A) (A) (A) (A) (A) (A) (A) (A) (A) (A)
                 (A) (A) (A) (A) (A) (A) (A) (A) (A) (A) (A) (A)
                 (A) (A) (A) (A) (A) (A) (A) (A) (A) (A) (A) (A)
                 (A) (A) (A) (A) (A) (A) (A) (A) (A) (A) (A) (A)
                 (A) (A) (A) (A) (A) (A) (A) (A) (A) (A) (A) (A)
                 (A) (A) (A) (A) (A) (A) (A) (A) (A) (A) (A) (A)
                 (A) (A) (A) (A) (A) (A) (A) (A) (A) (A) (A) (A)
                 (A) (A) (A) (A) (A) (A) (A) (A) (A) (A) (A) (A)
                 (A) (A) (A) (A) (A) (A) (A) (A) (A) (A) (A) (A)
                 (A) (A) (A) (A) (A) (A) (A) (A) (A) (A) (A) (A)
                 (A) (A) (A) (A) (A) (A) (A) (A) (A) (A) (A) (A)
                 (A) (A) (A) (A) (A) (A) (A) (A) (A) (A) (A) (A)
                 (A) (A) (A) (A) (A) (A) (A) (A) (A) (A) (A) (A)
                 (A) (A) (A) (A) (A) (A) (A) (A) (A) (A) (A) (A)
                 (A) (A) (A) (A) (A) (A) (A) (A) (A) (A) (A) (A)
                 (A) (A) (A) (A) (A) (A) (A) (A) (A) (A) (A) (A)
                 (A) (A) (A) (A) (A) (A) (A) (A) (A) (A) (A) (A)
                 (A) (A) (A) (A) (A) (A) (A) (A) (A) (A) (A) (A)
                 (A) (A) (A) (A) (A) (A) (A) (A) (A) (A) (A) (A)
                 (A) (A) (A) (A) (A) (A) (A) (A) (A) (A) (A) (A)
                 (A) (A) (A) (A) (A) (A) (A) (A) (A) (A) (A) (A)
                 (A) (A) (A) (A) (A) (A) (A) (A) (A) (A) (A) (A)
                 (A) (A) (A) (A) (A) (A) (A) (A) (A) (A) (A) (A)
                 (A) (A) (A) (A) (A) (A) (A) (A) (A) (A) (A) (A)
                 (A) (A) (A) (A) (A) (A) (A) (A) (A) (A) (A) (A)
                 (A) (A) (A) (A) (A) (A) (A) (A) (A) (A) (A) (A)
                 (A) (A) (A) (A) (A) (A) (A) (A) (A) (A) (A) (A)
                 (A) (A) (A) (A) (A) (A) (A) (A) (A) (A) (A) (A)
                 (A) (A) (A) (A) (A) (A) (A) (A) (A) (A) (A) (A)
                 (A) (A) (A) (A) (A) (A) (A) (A) (A) (A) (A) (A)
                 (A) (A) (A) (A) (A) (A) (A) (A) (A) (A) (A) (A)
                 (A) (A) (A) (A) (A) (A) (A) (A) (A) (A) (A) (A)
                 (A) (A) (A) (A) (A) (A) (A) (A) (A) (A) (A) (A)
                 (A) (A) (A) (A) (A) (A) (A) (A) (A) (A) (A) (A)
                 (A) (A) (A) (A) (A) (A) (A) (A) (A) (A) (A) (A)
                 (A) (A) (A) (A) (A) (A) (A) (A) (A) (A) (A) (A)
                 (A) (A) (A) (A) (A) (A) (A)
 The electronic state of the initial guess is 1-A.
 Initial guess <Sx>= 0.0000 <Sy>= 0.0000 <Sz>= 0.0000 <S**2>= 0.0000 S= 0.0000
 Generating alternative initial guess.
 Harris functional with IExCor=  402 diagonalized for initial guess.
 ExpMin= 1.61D-01 ExpMax= 5.48D+03 ExpMxC= 8.25D+02 IAcc=1 IRadAn=         1 AccDes= 0.00D+00
 HarFok:  IExCor=  402 AccDes= 0.00D+00 IRadAn=         1 IDoV= 1
 ScaDFX=  1.000000  1.000000  1.000000  1.000000
 FoFCou: FMM=F IPFlag=           0 FMFlag=      100000 FMFlg1=        2001
         NFxFlg=           0 DoJE=T BraDBF=F KetDBF=T FulRan=T
         Omega=  0.000000  0.000000  1.000000  0.000000  0.000000 ICntrl=     500 IOpCl=  0
         NMat0=    1 NMatS0=    1 NMatT0=    0 NMatD0=    1 NMtDS0=    0 NMtDT0=    0
         I1Cent=           4 NGrid=           0.
 Petite list used in FoFCou.
 Harris En= -1899.42520167004    
 Leave Link  401 at Thu Oct 13 22:41:16 2016, MaxMem= 1342177280 cpu:     217.9
 (Enter /opt/software/g09/linda-exe/l502.exel)
 UHF open shell SCF:
 Requested convergence on RMS density matrix=1.00D-08 within 600 cycles.
 Requested convergence on MAX density matrix=1.00D-06.
 Requested convergence on             energy=1.00D-06.
 No special actions if energy rises.
 Using DIIS extrapolation, IDIIS=  1040.
 Integral symmetry usage will be decided dynamically.
       579540 words used for storage of precomputed grid.
 IEnd=     2562402 IEndB=     2562402 NGot=  1342177280 MDV=  1340509709
 LenX=  1340509709 LenY=  1339976079
 Fock matrices will be formed incrementally for  20 cycles.

 Cycle   1  Pass 1  IDiag  1:
 FoFCou: FMM=T IPFlag=           0 FMFlag=      100000 FMFlg1=        2001
         NFxFlg=           0 DoJE=F BraDBF=F KetDBF=F FulRan=T
         Omega=  0.000000  0.000000  1.000000  0.000000  0.000000 ICntrl=       0 IOpCl=  1
         NMat0=    1 NMatS0=    1 NMatT0=    0 NMatD0=    1 NMtDS0=    0 NMtDT0=    0
         I1Cent=           0 NGrid=           0.
 Symmetry not used in FoFCou.
 FMM levels:  10  Number of levels for PrismC:   9
 E= -1899.52314915106    
 DIIS: error= 8.70D-03 at cycle   1 NSaved=   1.
 NSaved= 1 IEnMin= 1 EnMin= -1899.52314915106     IErMin= 1 ErrMin= 8.70D-03
 ErrMax= 8.70D-03 EMaxC= 1.00D-01 BMatC= 1.60D-01 BMatP= 1.60D-01
 IDIUse=3 WtCom= 9.13D-01 WtEn= 8.70D-02
 Coeff-Com:  0.100D+01
 Coeff-En:   0.100D+01
 Coeff:      0.100D+01
 Gap=     0.190 Goal=   None    Shift=    0.000
 Gap=     0.190 Goal=   None    Shift=    0.000
 GapD=    0.190 DampG=1.000 DampE=1.000 DampFc=1.0000 IDamp=-1.
 RMSDP=4.62D-04 MaxDP=1.90D-02              OVMax= 4.53D-02

 Cycle   2  Pass 1  IDiag  1:
 RMSU=  3.27D-04    CP:  9.99D-01
 E= -1899.59285450171     Delta-E=       -0.069705350655 Rises=F Damp=F
 DIIS: error= 1.26D-03 at cycle   2 NSaved=   2.
 NSaved= 2 IEnMin= 2 EnMin= -1899.59285450171     IErMin= 2 ErrMin= 1.26D-03
 ErrMax= 1.26D-03 EMaxC= 1.00D-01 BMatC= 3.63D-03 BMatP= 1.60D-01
 IDIUse=3 WtCom= 9.87D-01 WtEn= 1.26D-02
 Coeff-Com: -0.457D-01 0.105D+01
 Coeff-En:   0.000D+00 0.100D+01
 Coeff:     -0.452D-01 0.105D+01
 Gap=     0.160 Goal=   None    Shift=    0.000
 Gap=     0.160 Goal=   None    Shift=    0.000
 RMSDP=1.03D-04 MaxDP=1.20D-02 DE=-6.97D-02 OVMax= 1.66D-02

 Cycle   3  Pass 1  IDiag  1:
 RMSU=  6.84D-05    CP:  9.98D-01  1.07D+00
 E= -1899.59223685029     Delta-E=        0.000617651419 Rises=F Damp=F
 DIIS: error= 1.76D-03 at cycle   3 NSaved=   3.
 NSaved= 3 IEnMin= 2 EnMin= -1899.59285450171     IErMin= 2 ErrMin= 1.26D-03
 ErrMax= 1.76D-03 EMaxC= 1.00D-01 BMatC= 9.07D-03 BMatP= 3.63D-03
 IDIUse=3 WtCom= 1.93D-01 WtEn= 8.07D-01
 Coeff-Com: -0.477D-01 0.674D+00 0.374D+00
 Coeff-En:   0.000D+00 0.613D+00 0.387D+00
 Coeff:     -0.918D-02 0.624D+00 0.385D+00
 Gap=     0.160 Goal=   None    Shift=    0.000
 Gap=     0.160 Goal=   None    Shift=    0.000
 RMSDP=7.21D-05 MaxDP=1.03D-02 DE= 6.18D-04 OVMax= 1.44D-02

 Cycle   4  Pass 1  IDiag  1:
 RMSU=  2.29D-05    CP:  9.98D-01  1.09D+00  3.41D-01
 E= -1899.59413715232     Delta-E=       -0.001900302029 Rises=F Damp=F
 DIIS: error= 3.54D-04 at cycle   4 NSaved=   4.
 NSaved= 4 IEnMin= 4 EnMin= -1899.59413715232     IErMin= 4 ErrMin= 3.54D-04
 ErrMax= 3.54D-04 EMaxC= 1.00D-01 BMatC= 4.09D-04 BMatP= 3.63D-03
 IDIUse=3 WtCom= 9.96D-01 WtEn= 3.54D-03
 Coeff-Com: -0.120D-01 0.115D+00 0.197D+00 0.700D+00
 Coeff-En:   0.000D+00 0.000D+00 0.419D-02 0.996D+00
 Coeff:     -0.119D-01 0.115D+00 0.196D+00 0.701D+00
 Gap=     0.160 Goal=   None    Shift=    0.000
 Gap=     0.160 Goal=   None    Shift=    0.000
 RMSDP=1.62D-05 MaxDP=1.43D-03 DE=-1.90D-03 OVMax= 2.71D-03

 Cycle   5  Pass 1  IDiag  1:
 RMSU=  6.90D-06    CP:  9.98D-01  1.10D+00  4.64D-01  8.64D-01
 E= -1899.59422240619     Delta-E=       -0.000085253864 Rises=F Damp=F
 DIIS: error= 1.26D-04 at cycle   5 NSaved=   5.
 NSaved= 5 IEnMin= 5 EnMin= -1899.59422240619     IErMin= 5 ErrMin= 1.26D-04
 ErrMax= 1.26D-04 EMaxC= 1.00D-01 BMatC= 5.39D-05 BMatP= 4.09D-04
 IDIUse=3 WtCom= 9.99D-01 WtEn= 1.26D-03
 Coeff-Com: -0.242D-02 0.222D-02 0.830D-01 0.432D+00 0.485D+00
 Coeff-En:   0.000D+00 0.000D+00 0.000D+00 0.000D+00 0.100D+01
 Coeff:     -0.242D-02 0.222D-02 0.829D-01 0.431D+00 0.486D+00
 Gap=     0.160 Goal=   None    Shift=    0.000
 Gap=     0.160 Goal=   None    Shift=    0.000
 RMSDP=5.87D-06 MaxDP=4.40D-04 DE=-8.53D-05 OVMax= 8.24D-04

 Cycle   6  Pass 1  IDiag  1:
 RMSU=  2.49D-06    CP:  9.98D-01  1.10D+00  4.67D-01  9.03D-01  5.41D-01
 E= -1899.59423319486     Delta-E=       -0.000010788670 Rises=F Damp=F
 DIIS: error= 2.46D-05 at cycle   6 NSaved=   6.
 NSaved= 6 IEnMin= 6 EnMin= -1899.59423319486     IErMin= 6 ErrMin= 2.46D-05
 ErrMax= 2.46D-05 EMaxC= 1.00D-01 BMatC= 4.36D-06 BMatP= 5.39D-05
 IDIUse=1 WtCom= 1.00D+00 WtEn= 0.00D+00
 Coeff-Com:  0.530D-03-0.182D-01 0.130D-01 0.124D+00 0.265D+00 0.616D+00
 Coeff:      0.530D-03-0.182D-01 0.130D-01 0.124D+00 0.265D+00 0.616D+00
 Gap=     0.160 Goal=   None    Shift=    0.000
 Gap=     0.160 Goal=   None    Shift=    0.000
 RMSDP=1.70D-06 MaxDP=1.52D-04 DE=-1.08D-05 OVMax= 2.31D-04

 Cycle   7  Pass 1  IDiag  1:
 RMSU=  7.66D-07    CP:  9.98D-01  1.10D+00  4.69D-01  9.16D-01  6.01D-01
                    CP:  6.95D-01
 E= -1899.59423406219     Delta-E=       -0.000000867333 Rises=F Damp=F
 DIIS: error= 1.05D-05 at cycle   7 NSaved=   7.
 NSaved= 7 IEnMin= 7 EnMin= -1899.59423406219     IErMin= 7 ErrMin= 1.05D-05
 ErrMax= 1.05D-05 EMaxC= 1.00D-01 BMatC= 5.57D-07 BMatP= 4.36D-06
 IDIUse=1 WtCom= 1.00D+00 WtEn= 0.00D+00
 Coeff-Com:  0.481D-03-0.110D-01 0.931D-03 0.388D-01 0.117D+00 0.361D+00
 Coeff-Com:  0.493D+00
 Coeff:      0.481D-03-0.110D-01 0.931D-03 0.388D-01 0.117D+00 0.361D+00
 Coeff:      0.493D+00
 Gap=     0.160 Goal=   None    Shift=    0.000
 Gap=     0.160 Goal=   None    Shift=    0.000
 RMSDP=5.91D-07 MaxDP=4.23D-05 DE=-8.67D-07 OVMax= 1.01D-04

 Cycle   8  Pass 1  IDiag  1:
 RMSU=  2.65D-07    CP:  9.98D-01  1.10D+00  4.69D-01  9.19D-01  6.08D-01
                    CP:  7.30D-01  6.08D-01
 E= -1899.59423418062     Delta-E=       -0.000000118427 Rises=F Damp=F
 DIIS: error= 3.42D-06 at cycle   8 NSaved=   8.
 NSaved= 8 IEnMin= 8 EnMin= -1899.59423418062     IErMin= 8 ErrMin= 3.42D-06
 ErrMax= 3.42D-06 EMaxC= 1.00D-01 BMatC= 4.07D-08 BMatP= 5.57D-07
 IDIUse=1 WtCom= 1.00D+00 WtEn= 0.00D+00
 Coeff-Com:  0.197D-03-0.378D-02-0.983D-03 0.680D-02 0.319D-01 0.118D+00
 Coeff-Com:  0.255D+00 0.593D+00
 Coeff:      0.197D-03-0.378D-02-0.983D-03 0.680D-02 0.319D-01 0.118D+00
 Coeff:      0.255D+00 0.593D+00
 Gap=     0.160 Goal=   None    Shift=    0.000
 Gap=     0.160 Goal=   None    Shift=    0.000
 RMSDP=1.79D-07 MaxDP=1.50D-05 DE=-1.18D-07 OVMax= 3.17D-05

 Cycle   9  Pass 1  IDiag  1:
 RMSU=  9.16D-08    CP:  9.98D-01  1.10D+00  4.69D-01  9.19D-01  6.11D-01
                    CP:  7.40D-01  6.68D-01  7.48D-01
 E= -1899.59423418928     Delta-E=       -0.000000008664 Rises=F Damp=F
 DIIS: error= 1.04D-06 at cycle   9 NSaved=   9.
 NSaved= 9 IEnMin= 9 EnMin= -1899.59423418928     IErMin= 9 ErrMin= 1.04D-06
 ErrMax= 1.04D-06 EMaxC= 1.00D-01 BMatC= 4.38D-09 BMatP= 4.07D-08
 IDIUse=1 WtCom= 1.00D+00 WtEn= 0.00D+00
 Coeff-Com:  0.258D-04-0.235D-03-0.588D-03-0.205D-02-0.102D-02 0.499D-02
 Coeff-Com:  0.514D-01 0.287D+00 0.661D+00
 Coeff:      0.258D-04-0.235D-03-0.588D-03-0.205D-02-0.102D-02 0.499D-02
 Coeff:      0.514D-01 0.287D+00 0.661D+00
 Gap=     0.160 Goal=   None    Shift=    0.000
 Gap=     0.160 Goal=   None    Shift=    0.000
 RMSDP=6.25D-08 MaxDP=5.60D-06 DE=-8.66D-09 OVMax= 1.14D-05

 Cycle  10  Pass 1  IDiag  1:
 RMSU=  2.97D-08    CP:  9.98D-01  1.10D+00  4.69D-01  9.19D-01  6.11D-01
                    CP:  7.40D-01  6.73D-01  8.23D-01  7.38D-01
 E= -1899.59423419028     Delta-E=       -0.000000000997 Rises=F Damp=F
 DIIS: error= 5.15D-07 at cycle  10 NSaved=  10.
 NSaved=10 IEnMin=10 EnMin= -1899.59423419028     IErMin=10 ErrMin= 5.15D-07
 ErrMax= 5.15D-07 EMaxC= 1.00D-01 BMatC= 7.42D-10 BMatP= 4.38D-09
 IDIUse=1 WtCom= 1.00D+00 WtEn= 0.00D+00
 Coeff-Com: -0.306D-06 0.167D-03-0.248D-03-0.166D-02-0.314D-02-0.669D-02
 Coeff-Com:  0.855D-02 0.116D+00 0.383D+00 0.504D+00
 Coeff:     -0.306D-06 0.167D-03-0.248D-03-0.166D-02-0.314D-02-0.669D-02
 Coeff:      0.855D-02 0.116D+00 0.383D+00 0.504D+00
 Gap=     0.160 Goal=   None    Shift=    0.000
 Gap=     0.160 Goal=   None    Shift=    0.000
 RMSDP=2.27D-08 MaxDP=1.60D-06 DE=-9.97D-10 OVMax= 3.96D-06

 Cycle  11  Pass 1  IDiag  1:
 RMSU=  9.50D-09    CP:  9.98D-01  1.10D+00  4.69D-01  9.19D-01  6.11D-01
                    CP:  7.40D-01  6.77D-01  8.31D-01  7.83D-01  6.16D-01
 E= -1899.59423419057     Delta-E=       -0.000000000296 Rises=F Damp=F
 DIIS: error= 1.45D-07 at cycle  11 NSaved=  11.
 NSaved=11 IEnMin=11 EnMin= -1899.59423419057     IErMin=11 ErrMin= 1.45D-07
 ErrMax= 1.45D-07 EMaxC= 1.00D-01 BMatC= 6.51D-11 BMatP= 7.42D-10
 IDIUse=1 WtCom= 1.00D+00 WtEn= 0.00D+00
 Coeff-Com: -0.273D-05 0.115D-03-0.676D-04-0.677D-03-0.165D-02-0.427D-02
 Coeff-Com: -0.945D-03 0.328D-01 0.142D+00 0.277D+00 0.556D+00
 Coeff:     -0.273D-05 0.115D-03-0.676D-04-0.677D-03-0.165D-02-0.427D-02
 Coeff:     -0.945D-03 0.328D-01 0.142D+00 0.277D+00 0.556D+00
 Gap=     0.160 Goal=   None    Shift=    0.000
 Gap=     0.160 Goal=   None    Shift=    0.000
 RMSDP=6.93D-09 MaxDP=7.46D-07 DE=-2.96D-10 OVMax= 8.15D-07

 Error on total polarization charges =  0.01330
 SCF Done:  E(UB3LYP) =  -1899.59423419     A.U. after   11 cycles
             Convg  =    0.6926D-08             -V/T =  2.0068
 <Sx>= 0.0000 <Sy>= 0.0000 <Sz>= 0.0000 <S**2>= 0.0000 S= 0.0000
 <L.S>= 0.000000000000E+00
 KE= 1.886840650142D+03 PE=-1.274058097947D+04 EE= 4.801403646025D+03
 Annihilation of the first spin contaminant:
 S**2 before annihilation     0.0000,   after     0.0000
 Leave Link  502 at Thu Oct 13 22:47:14 2016, MaxMem= 1342177280 cpu:    6755.1
 (Enter /opt/software/g09/linda-exe/l701.exel)
 Compute integral first derivatives.
 ... and contract with generalized density number  0.
   1 Symmetry operations used in ECPInt.
 ECPInt:  NShTT=   28441 NPrTT=  163533 LenC2=   15508 LenP2D=   47612.
 LDataN:  DoStor=T MaxTD1= 5 Len=  102
 D1PCM: PCM CHGder 1st derivatives, ID1Alg=3 FixD1E=F DoIter=F DoCFld=F I1PDM=0.
 GePol: Maximum number of non-zero 1st derivatives   =     197
 Leave Link  701 at Thu Oct 13 22:47:26 2016, MaxMem= 1342177280 cpu:     211.1
 (Enter /opt/software/g09/l702.exe)
 L702 exits ... SP integral derivatives will be done elsewhere.
 Leave Link  702 at Thu Oct 13 22:47:26 2016, MaxMem= 1342177280 cpu:       0.3
 (Enter /opt/software/g09/linda-exe/l703.exel)
 Compute integral first derivatives, UseDBF=F ICtDFT=           0.
 Integral derivatives from FoFDir, PRISM(SPDF).
 Calling FoFJK, ICntrl=      2127 FMM=T ISym2X=0 I1Cent= 0 IOpClX= 1 NMat=1 NMatS=1 NMatT=0.
 FoFCou: FMM=T IPFlag=           0 FMFlag=      100000 FMFlg1=        2001
         NFxFlg=           0 DoJE=F BraDBF=F KetDBF=F FulRan=T
         Omega=  0.000000  0.000000  1.000000  0.000000  0.000000 ICntrl=    2127 IOpCl=  1
         NMat0=    1 NMatS0=    1 NMatT0=    0 NMatD0=    1 NMtDS0=    0 NMtDT0=    0
         I1Cent=           0 NGrid=           0.
 Symmetry not used in FoFCou.
 FMM levels:  10  Number of levels for PrismC:   9
 Leave Link  703 at Thu Oct 13 22:47:49 2016, MaxMem= 1342177280 cpu:     433.9
 (Enter /opt/software/g09/l716.exe)
 Dipole        =-1.89317579D+00-2.01766722D-01 1.43895454D+00
 ***** Axes restored to original set *****
 -------------------------------------------------------------------
 Center     Atomic                   Forces (Hartrees/Bohr)
 Number     Number              X              Y              Z
 -------------------------------------------------------------------
      1        8           0.000801045    0.000051832    0.000924175
      2        6          -0.000171344   -0.000225707    0.000666942
      3        6          -0.000124757   -0.000062877    0.002097721
      4        6          -0.000286417   -0.000793373   -0.000389822
      5        6          -0.001027139    0.000825488    0.000426149
      6        8           0.000513647   -0.000198472    0.000233962
      7        6           0.000142934    0.001595464    0.002052446
      8        6           0.002918380   -0.001083413   -0.003403635
      9        8          -0.002094022    0.001004503    0.001887854
     10        8          -0.001130378   -0.001365510   -0.001027572
     11        7           0.000401305   -0.002276315   -0.003170382
     12        7          -0.008928303   -0.000213406   -0.003515273
     13        7          -0.003127776   -0.000276607    0.003626012
     14        6           0.013832924    0.000335166   -0.001054641
     15        6          -0.001562246    0.000885731   -0.004979533
     16        6           0.001794107    0.000206965   -0.000849730
     17        6          -0.000563759    0.000057661   -0.000435708
     18        6          -0.000059803   -0.000068828    0.000382330
     19        6           0.002130756    0.000381695   -0.003278700
     20        6          -0.006198015   -0.001724781    0.011641518
     21        7           0.000914588   -0.000576813    0.002230435
     22        6          -0.000913774    0.000773629    0.000725407
     23        6           0.001606906   -0.000545936   -0.000168369
     24        6          -0.000729542    0.000402682   -0.000246275
     25        6          -0.000277445    0.000071643    0.000332602
     26        6           0.000121286   -0.000040944   -0.000044889
     27        6          -0.000071741    0.000010785   -0.000170257
     28        6          -0.000642989    0.000120756    0.000226584
     29        8          -0.000247054   -0.000323250   -0.000845134
     30        7           0.000078449    0.002283994    0.002032571
     31        7          -0.001720577   -0.001995716    0.000273081
     32        6           0.000365562    0.000993746   -0.001349883
     33        6          -0.000273378    0.000359978    0.000808886
     34        6           0.000313624    0.000063526   -0.000301623
     35        6          -0.000212984    0.000045755    0.000252050
     36        6           0.000107054   -0.000121630   -0.000521354
     37        6           0.000617989    0.000193770    0.001063505
     38        6          -0.000639178   -0.001005447   -0.002812310
     39        8           0.000114485    0.000143202    0.001764638
     40        1           0.000874158    0.000085972   -0.000099422
     41        1          -0.000021219    0.000180351    0.000219713
     42        1          -0.000024483   -0.000251253    0.000073779
     43        1          -0.000219586   -0.000024831   -0.000009847
     44        1           0.000181213    0.000032886    0.000104544
     45        1           0.000277064    0.001126870    0.000172042
     46        1          -0.000893431    0.000078155    0.000549127
     47        1           0.000702044    0.000003118    0.000042458
     48        1           0.000078637   -0.000007814   -0.000020777
     49        1          -0.000001574    0.000025529   -0.000208343
     50        1           0.000142274   -0.000018529    0.000145410
     51        1           0.000124187   -0.000015647    0.000209483
     52        1          -0.000017617    0.000043008   -0.000095623
     53        1          -0.000008421    0.000011296    0.000007929
     54        1           0.000031377    0.000000075    0.000008777
     55        1           0.000098839    0.000013759    0.000082810
     56        1           0.000063381    0.000199632   -0.000076776
     57        1           0.000217857   -0.000481280   -0.000155843
     58        1          -0.000247491   -0.000277753    0.000086207
     59        1          -0.000069926   -0.000023390    0.000007018
     60        1           0.000021047   -0.000012593   -0.000017032
     61        1           0.000043862    0.000035959    0.000043400
     62        1          -0.000085909   -0.000016172   -0.000207694
     63        1           0.001186625    0.000604663    0.000203205
     64        8           0.003797945    0.001005719   -0.009725588
     65        1          -0.001601771   -0.000252129    0.003864600
     66        1          -0.000421500    0.000025451   -0.000287335
 -------------------------------------------------------------------
 Cartesian Forces:  Max     0.013832924 RMS     0.001986686
 Leave Link  716 at Thu Oct 13 22:47:49 2016, MaxMem= 1342177280 cpu:       0.4
 (Enter /opt/software/g09/l103.exe)

 GradGradGradGradGradGradGradGradGradGradGradGradGradGradGradGradGradGrad
 Berny optimization.
 Using GEDIIS/GDIIS optimizer.
 Internal  Forces:  Max     0.017033065 RMS     0.001578592
 Search for a local minimum.
 Step number   2 out of a maximum of  339
 All quantities printed in internal units (Hartrees-Bohrs-Radians)
 RMS Force = .15786D-02 SwitMx=.10000D-02 MixMth= 1
 Mixed Optimization -- RFO/linear search
 Update second derivatives using D2CorX and points    1    2
 DE= -1.05D-02 DEPred=-1.12D-02 R= 9.31D-01
 SS=  1.41D+00  RLast= 2.93D-01 DXNew= 5.0454D-01 8.7914D-01
 Trust test= 9.31D-01 RLast= 2.93D-01 DXMaxT set to 5.05D-01
 ITU=  1  0
 Use linear search instead of GDIIS.
     Eigenvalues ---    0.00230   0.00230   0.00403   0.00453   0.00614
     Eigenvalues ---    0.01025   0.01065   0.01230   0.01236   0.01295
     Eigenvalues ---    0.01309   0.01320   0.01396   0.01618   0.01706
     Eigenvalues ---    0.01735   0.01741   0.01801   0.01832   0.01861
     Eigenvalues ---    0.01882   0.01889   0.01916   0.01937   0.01940
     Eigenvalues ---    0.01989   0.01989   0.02012   0.02013   0.02033
     Eigenvalues ---    0.02089   0.02090   0.02093   0.02098   0.02098
     Eigenvalues ---    0.02099   0.02108   0.02116   0.02129   0.02130
     Eigenvalues ---    0.02134   0.02146   0.02159   0.02160   0.02163
     Eigenvalues ---    0.02166   0.02166   0.02184   0.02186   0.02188
     Eigenvalues ---    0.02189   0.02211   0.02262   0.02437   0.03137
     Eigenvalues ---    0.03155   0.03218   0.03808   0.03971   0.05074
     Eigenvalues ---    0.05341   0.05769   0.06076   0.07201   0.07253
     Eigenvalues ---    0.08682   0.09480   0.09599   0.12946   0.13022
     Eigenvalues ---    0.15363   0.15752   0.15962   0.16000   0.16000
     Eigenvalues ---    0.16000   0.16000   0.16000   0.16000   0.16000
     Eigenvalues ---    0.16000   0.16000   0.16000   0.16000   0.16000
     Eigenvalues ---    0.16000   0.16000   0.16000   0.16000   0.16116
     Eigenvalues ---    0.16354   0.16462   0.16782   0.17650   0.18889
     Eigenvalues ---    0.22000   0.22000   0.22000   0.22000   0.22007
     Eigenvalues ---    0.22017   0.22086   0.22104   0.22343   0.22484
     Eigenvalues ---    0.22488   0.22822   0.24207   0.24468   0.24471
     Eigenvalues ---    0.24487   0.24881   0.24989   0.24994   0.24998
     Eigenvalues ---    0.24999   0.25000   0.25000   0.25000   0.25000
     Eigenvalues ---    0.25000   0.25000   0.25000   0.27100   0.27337
     Eigenvalues ---    0.27419   0.30010   0.30500   0.31540   0.33792
     Eigenvalues ---    0.33941   0.33965   0.34123   0.34815   0.34971
     Eigenvalues ---    0.34975   0.35021   0.35077   0.35151   0.35163
     Eigenvalues ---    0.35221   0.35267   0.35288   0.35377   0.35379
     Eigenvalues ---    0.35392   0.35408   0.36333   0.37069   0.37243
     Eigenvalues ---    0.37379   0.38929   0.39027   0.40652   0.40801
     Eigenvalues ---    0.41160   0.41542   0.41574   0.41641   0.43733
     Eigenvalues ---    0.44191   0.44345   0.44412   0.44500   0.44946
     Eigenvalues ---    0.45502   0.45545   0.45730   0.46270   0.46300
     Eigenvalues ---    0.46475   0.46881   0.46953   0.47242   0.48057
     Eigenvalues ---    0.48923   0.49056   0.51522   0.52549   0.52793
     Eigenvalues ---    0.53073   0.53216   0.53585   0.54032   0.55411
     Eigenvalues ---    0.56274   0.70157   0.71606   0.72169   0.86817
     Eigenvalues ---    0.91560   0.95507
 RFO step:  Lambda=-3.30300484D-03 EMin= 2.29998003D-03
 Quartic linear search produced a step of -0.02705.
 Iteration  1 RMS(Cart)=  0.17804609 RMS(Int)=  0.00306704
 Iteration  2 RMS(Cart)=  0.01118482 RMS(Int)=  0.00026489
 Iteration  3 RMS(Cart)=  0.00008380 RMS(Int)=  0.00026441
 Iteration  4 RMS(Cart)=  0.00000005 RMS(Int)=  0.00026441
 Variable       Old X    -DE/DX   Delta X   Delta X   Delta X     New X
                                 (Linear)    (Quad)   (Total)
    R1        2.69411  -0.00090   0.00014  -0.00323  -0.00336   2.69075
    R2        1.86584  -0.00044   0.00000  -0.00031   0.00058   1.86642
    R3        2.93292  -0.00103   0.00003  -0.00383  -0.00380   2.92912
    R4        2.94020  -0.00122  -0.00010  -0.00459  -0.00556   2.93464
    R5        2.93988  -0.00109  -0.00011  -0.00308  -0.00318   2.93670
    R6        2.31964   0.00036   0.00007  -0.00010  -0.00003   2.31962
    R7        2.56248   0.00244   0.00033   0.00227   0.00260   2.56508
    R8        2.86468  -0.00014   0.00001  -0.00125  -0.00203   2.86264
    R9        2.07344   0.00008   0.00002   0.00006   0.00009   2.07353
   R10        2.05552   0.00009   0.00004  -0.00004   0.00000   2.05552
   R11        2.87704  -0.00064   0.00006  -0.00245  -0.00239   2.87465
   R12        2.05974  -0.00002   0.00000  -0.00007  -0.00007   2.05967
   R13        2.06973   0.00003   0.00004  -0.00019  -0.00014   2.06959
   R14        2.34785   0.00129  -0.00011   0.00223   0.00229   2.35015
   R15        2.56850  -0.00135   0.00007  -0.00296  -0.00288   2.56562
   R16        2.31193   0.00290  -0.00021   0.00432   0.00411   2.31604
   R17        2.60689  -0.00128   0.00031  -0.00465  -0.00434   2.60255
   R18        3.29166   0.00018  -0.00023   0.00839   0.00921   3.30087
   R19        2.57895   0.00216  -0.00016   0.00502   0.00486   2.58381
   R20        1.92979  -0.00010  -0.00001  -0.00012  -0.00013   1.92966
   R21        2.57574   0.00866   0.00064   0.01239   0.01303   2.58877
   R22        1.92834  -0.00017  -0.00045   0.00265   0.00220   1.93054
   R23        2.42392   0.01047   0.00041   0.01170   0.01212   2.43604
   R24        2.76599  -0.00227   0.00004  -0.00625  -0.00621   2.75977
   R25        2.07390  -0.00036  -0.00049   0.00231   0.00182   2.07573
   R26        2.66364   0.00114  -0.00008   0.00301   0.00293   2.66657
   R27        2.67219   0.00073   0.00018   0.00058   0.00076   2.67296
   R28        2.62891  -0.00074  -0.00002  -0.00152  -0.00154   2.62737
   R29        2.05227   0.00049  -0.00082   0.00679   0.00597   2.05824
   R30        2.64036   0.00038  -0.00008   0.00117   0.00109   2.64145
   R31        2.05016   0.00005   0.00001   0.00003   0.00004   2.05020
   R32        2.63327   0.00051  -0.00002   0.00120   0.00117   2.63444
   R33        2.05165   0.00003   0.00002  -0.00007  -0.00005   2.05160
   R34        2.63886   0.00296   0.00020   0.00510   0.00530   2.64416
   R35        2.05404   0.00020   0.00009  -0.00003   0.00006   2.05410
   R36        2.59304  -0.00630   0.00296  -0.03475  -0.03179   2.56124
   R37        2.43190   0.00089  -0.00011   0.00195   0.00184   2.43374
   R38        2.75977  -0.00099  -0.00008  -0.00205  -0.00213   2.75765
   R39        2.07382  -0.00021   0.00008  -0.00114  -0.00106   2.07276
   R40        2.68367  -0.00165  -0.00013  -0.00294  -0.00306   2.68060
   R41        2.66269   0.00051  -0.00008   0.00163   0.00155   2.66424
   R42        2.64600   0.00021  -0.00003   0.00059   0.00056   2.64656
   R43        2.56511   0.00021  -0.00003   0.00055   0.00053   2.56564
   R44        2.63281  -0.00001  -0.00002   0.00013   0.00011   2.63292
   R45        2.05510  -0.00008   0.00004  -0.00047  -0.00043   2.05467
   R46        2.64108   0.00014  -0.00007   0.00080   0.00074   2.64182
   R47        2.05180   0.00001   0.00001  -0.00003  -0.00002   2.05178
   R48        2.62707  -0.00013  -0.00001  -0.00018  -0.00019   2.62688
   R49        2.05013  -0.00002   0.00000  -0.00007  -0.00007   2.05006
   R50        2.05390  -0.00012   0.00001  -0.00040  -0.00039   2.05351
   R51        1.82990  -0.00006  -0.00008   0.00041   0.00033   1.83024
   R52        2.57106   0.00078  -0.00007   0.00186   0.00180   2.57286
   R53        1.92404   0.00022   0.00004   0.00019   0.00023   1.92428
   R54        2.43926   0.00041  -0.00007   0.00108   0.00102   2.44029
   R55        3.32020  -0.00098   0.00036  -0.01497  -0.01456   3.30564
   R56        2.74814  -0.00045  -0.00009  -0.00071  -0.00084   2.74730
   R57        2.07000  -0.00021   0.00010  -0.00132  -0.00121   2.06879
   R58        2.66145   0.00013  -0.00002   0.00041   0.00038   2.66182
   R59        2.68906  -0.00024   0.00002  -0.00100  -0.00105   2.68801
   R60        2.62469  -0.00006  -0.00006   0.00035   0.00029   2.62499
   R61        2.05441  -0.00006   0.00003  -0.00036  -0.00033   2.05408
   R62        2.64996  -0.00022  -0.00002  -0.00024  -0.00024   2.64972
   R63        2.05024   0.00002   0.00001  -0.00002  -0.00001   2.05023
   R64        2.62874   0.00039  -0.00007   0.00127   0.00121   2.62994
   R65        2.05277  -0.00006   0.00001  -0.00024  -0.00023   2.05253
   R66        2.65150  -0.00066   0.00001  -0.00153  -0.00152   2.64997
   R67        2.05129  -0.00005  -0.00002   0.00002  -0.00001   2.05128
   R68        2.54643   0.00240  -0.00019   0.00535   0.00514   2.55157
   R69        1.86960   0.00042  -0.00001   0.00107   0.00110   1.87070
   R70        1.82845   0.00109  -0.00039   0.00450   0.00411   1.83256
    A1        1.84978   0.00032  -0.00005   0.00052  -0.00054   1.84925
    A2        1.92338  -0.00178  -0.00023  -0.01060  -0.01032   1.91306
    A3        1.94411   0.00070   0.00001  -0.00228  -0.00324   1.94087
    A4        1.91676   0.00068   0.00008   0.00138   0.00164   1.91840
    A5        1.84361   0.00098   0.00026   0.00753   0.00806   1.85167
    A6        1.84661   0.00137   0.00030   0.01016   0.01015   1.85677
    A7        1.98511  -0.00198  -0.00042  -0.00581  -0.00586   1.97925
    A8        2.11083   0.00079  -0.00025   0.00474   0.00449   2.11532
    A9        1.97911  -0.00055  -0.00005  -0.00173  -0.00179   1.97732
   A10        2.19315  -0.00024   0.00031  -0.00299  -0.00269   2.19047
   A11        1.98042  -0.00094  -0.00037  -0.00580  -0.00878   1.97164
   A12        1.87905   0.00006   0.00016   0.00013   0.00083   1.87989
   A13        1.92869   0.00047  -0.00004   0.00273   0.00354   1.93224
   A14        1.84175   0.00067   0.00024   0.00385   0.00452   1.84627
   A15        1.95085  -0.00006   0.00002  -0.00145  -0.00028   1.95058
   A16        1.87661  -0.00014   0.00002   0.00100   0.00070   1.87731
   A17        2.00822  -0.00189  -0.00030  -0.00681  -0.00711   2.00111
   A18        1.90749   0.00073   0.00001   0.00392   0.00393   1.91142
   A19        1.86890   0.00035   0.00002   0.00006   0.00007   1.86897
   A20        1.88342   0.00047  -0.00002   0.00198   0.00197   1.88539
   A21        1.90379   0.00065   0.00025   0.00029   0.00053   1.90433
   A22        1.88909  -0.00024   0.00005   0.00091   0.00095   1.89004
   A23        2.11801   0.00049   0.00015  -0.00070  -0.00224   2.11577
   A24        2.07386  -0.00024  -0.00008   0.00083   0.00150   2.07536
   A25        2.09019  -0.00022  -0.00006   0.00083   0.00151   2.09170
   A26        2.15911  -0.00021   0.00001  -0.00066  -0.00075   2.15837
   A27        1.97638  -0.00012  -0.00010   0.00047   0.00027   1.97666
   A28        2.14729   0.00034   0.00010   0.00086   0.00087   2.14815
   A29        2.14049   0.00009  -0.00014   0.00219   0.00176   2.14225
   A30        2.02431   0.00034  -0.00010   0.00409   0.00371   2.02802
   A31        2.11264  -0.00033   0.00016  -0.00173  -0.00186   2.11078
   A32        2.15294  -0.00628   0.00381  -0.05325  -0.04945   2.10349
   A33        2.02873   0.00216  -0.00050   0.01115   0.01064   2.03937
   A34        2.10141   0.00413  -0.00332   0.04222   0.03890   2.14031
   A35        1.97029   0.01703   0.00308   0.04430   0.04738   2.01767
   A36        2.17662   0.00152  -0.00092   0.01287   0.01195   2.18857
   A37        2.10437  -0.00013   0.00052  -0.00315  -0.00263   2.10174
   A38        2.00219  -0.00139   0.00040  -0.00972  -0.00932   1.99287
   A39        2.02826   0.00294   0.00014   0.01019   0.01033   2.03859
   A40        2.20915  -0.00491  -0.00027  -0.01707  -0.01735   2.19180
   A41        2.04577   0.00198   0.00014   0.00688   0.00702   2.05279
   A42        2.13557  -0.00034   0.00009  -0.00246  -0.00237   2.13320
   A43        2.06435   0.00001   0.00021  -0.00145  -0.00124   2.06311
   A44        2.08326   0.00032  -0.00030   0.00392   0.00361   2.08687
   A45        2.08059  -0.00024  -0.00008  -0.00115  -0.00124   2.07935
   A46        2.09701   0.00019   0.00008   0.00069   0.00078   2.09778
   A47        2.10559   0.00005   0.00000   0.00046   0.00046   2.10605
   A48        2.09309   0.00071   0.00001   0.00266   0.00267   2.09576
   A49        2.10500  -0.00057  -0.00004  -0.00235  -0.00239   2.10261
   A50        2.08510  -0.00014   0.00003  -0.00031  -0.00028   2.08482
   A51        2.10542   0.00051   0.00020   0.00114   0.00135   2.10677
   A52        2.09804  -0.00028  -0.00009  -0.00077  -0.00087   2.09717
   A53        2.07973  -0.00023  -0.00011  -0.00037  -0.00048   2.07925
   A54        2.10592  -0.00262  -0.00036  -0.00707  -0.00742   2.09850
   A55        2.08350  -0.00249   0.00032  -0.01198  -0.01167   2.07183
   A56        2.09376   0.00512   0.00004   0.01905   0.01909   2.11285
   A57        2.02430   0.00015   0.00031  -0.00151  -0.00120   2.02310
   A58        2.18350  -0.00093  -0.00027  -0.00220  -0.00247   2.18103
   A59        2.09877   0.00060   0.00013   0.00190   0.00203   2.10079
   A60        2.00092   0.00034   0.00014   0.00030   0.00044   2.00135
   A61        2.18936  -0.00100  -0.00032  -0.00154  -0.00186   2.18750
   A62        2.03740   0.00068   0.00030   0.00060   0.00091   2.03831
   A63        2.05640   0.00032   0.00002   0.00096   0.00097   2.05738
   A64        2.09105   0.00016  -0.00002   0.00052   0.00051   2.09156
   A65        2.08025  -0.00130  -0.00017  -0.00369  -0.00386   2.07639
   A66        2.11188   0.00113   0.00019   0.00317   0.00335   2.11524
   A67        2.10944  -0.00014   0.00003  -0.00081  -0.00078   2.10866
   A68        2.07670   0.00001   0.00000   0.00000   0.00000   2.07669
   A69        2.09704   0.00012  -0.00003   0.00081   0.00078   2.09783
   A70        2.09782  -0.00001  -0.00004   0.00045   0.00041   2.09823
   A71        2.08378   0.00002   0.00004  -0.00029  -0.00025   2.08354
   A72        2.10158  -0.00001   0.00000  -0.00016  -0.00016   2.10142
   A73        2.07832  -0.00010  -0.00001  -0.00010  -0.00010   2.07822
   A74        2.10589   0.00003  -0.00001   0.00006   0.00005   2.10593
   A75        2.09898   0.00007   0.00002   0.00004   0.00006   2.09903
   A76        2.13333  -0.00024   0.00001  -0.00102  -0.00101   2.13232
   A77        2.06243   0.00013   0.00000   0.00056   0.00055   2.06298
   A78        2.08743   0.00011  -0.00001   0.00047   0.00046   2.08789
   A79        1.90260   0.00008   0.00001   0.00035   0.00037   1.90297
   A80        2.08864   0.00086  -0.00015   0.00562   0.00542   2.09406
   A81        2.06846  -0.00039   0.00018  -0.00147  -0.00134   2.06712
   A82        2.09050  -0.00035  -0.00008   0.00056   0.00042   2.09093
   A83        2.07292   0.00044   0.00022   0.00022   0.00044   2.07335
   A84        2.10969  -0.00084   0.00002  -0.00446  -0.00457   2.10512
   A85        2.11958   0.00056   0.00000   0.00307   0.00307   2.12265
   A86        2.05386   0.00028  -0.00002   0.00156   0.00154   2.05540
   A87        2.08484  -0.00018   0.00008  -0.00050  -0.00033   2.08451
   A88        2.12504   0.00002  -0.00013   0.00005  -0.00021   2.12482
   A89        2.07330   0.00016   0.00005   0.00048   0.00055   2.07385
   A90        2.11950  -0.00021   0.00002  -0.00115  -0.00115   2.11835
   A91        2.06719   0.00014   0.00001   0.00066   0.00068   2.06787
   A92        2.09649   0.00007  -0.00003   0.00049   0.00047   2.09696
   A93        2.08013   0.00000  -0.00005   0.00049   0.00044   2.08057
   A94        2.10041  -0.00003   0.00002  -0.00038  -0.00036   2.10005
   A95        2.10265   0.00002   0.00002  -0.00011  -0.00008   2.10257
   A96        2.10691   0.00004   0.00004   0.00004   0.00008   2.10699
   A97        2.09332   0.00000  -0.00003   0.00021   0.00018   2.09351
   A98        2.08295  -0.00005  -0.00001  -0.00025  -0.00026   2.08269
   A99        2.10258  -0.00007   0.00004  -0.00082  -0.00080   2.10178
   A100       2.11828  -0.00019   0.00007  -0.00156  -0.00148   2.11680
   A101       2.06232   0.00026  -0.00011   0.00239   0.00228   2.06460
   A102       2.08395   0.00008  -0.00010   0.00096   0.00088   2.08483
   A103       2.13729   0.00007   0.00016  -0.00147  -0.00143   2.13587
   A104       2.06195  -0.00015  -0.00006   0.00052   0.00054   2.06249
   A105       1.88633   0.00100   0.00034   0.00295   0.00323   1.88956
   A106       1.85707   0.00738   0.00146   0.03380   0.03526   1.89233
    D1       -2.49027   0.00052   0.00023   0.02033   0.02041  -2.46986
    D2       -0.44995   0.00104   0.00042   0.02160   0.02197  -0.42798
    D3        1.76529  -0.00050  -0.00005   0.01336   0.01316   1.77845
    D4       -3.04400   0.00001  -0.00013   0.01217   0.01171  -3.03230
    D5        0.11148  -0.00002  -0.00020   0.01077   0.01024   0.12172
    D6        1.13729  -0.00044  -0.00018   0.01617   0.01643   1.15372
    D7       -1.99041  -0.00046  -0.00024   0.01477   0.01496  -1.97545
    D8       -0.97292   0.00067   0.00002   0.01409   0.01400  -0.95892
    D9        2.18256   0.00065  -0.00005   0.01268   0.01253   2.19510
   D10        0.84491   0.00094   0.00038   0.04682   0.04655   0.89147
   D11       -1.18647   0.00063   0.00020   0.04531   0.04547  -1.14100
   D12        3.05195   0.00051   0.00010   0.04254   0.04218   3.09413
   D13        2.93320  -0.00022   0.00027   0.03741   0.03726   2.97045
   D14        0.90182  -0.00054   0.00009   0.03590   0.03618   0.93799
   D15       -1.14295  -0.00066  -0.00001   0.03312   0.03288  -1.11007
   D16       -1.33251   0.00101   0.00058   0.05135   0.05150  -1.28102
   D17        2.91929   0.00069   0.00040   0.04984   0.05042   2.96971
   D18        0.87452   0.00057   0.00030   0.04707   0.04712   0.92165
   D19       -1.07443  -0.00023  -0.00036   0.02119   0.02128  -1.05314
   D20        3.08711  -0.00008  -0.00013   0.02036   0.02069   3.10781
   D21        1.04461  -0.00037  -0.00021   0.01721   0.01746   1.06207
   D22        3.13329   0.00075  -0.00031   0.02725   0.02688  -3.12302
   D23        1.01165   0.00090  -0.00008   0.02643   0.02629   1.03794
   D24       -1.03086   0.00061  -0.00016   0.02327   0.02305  -1.00780
   D25        1.11758  -0.00026  -0.00059   0.01486   0.01387   1.13145
   D26       -1.00406  -0.00011  -0.00036   0.01403   0.01328  -0.99078
   D27       -3.04656  -0.00040  -0.00044   0.01088   0.01004  -3.03652
   D28       -3.14008  -0.00011   0.00010  -0.00512  -0.00500   3.13811
   D29       -0.01381   0.00007  -0.00009   0.00408   0.00397  -0.00984
   D30        0.01618  -0.00015   0.00004  -0.00668  -0.00661   0.00957
   D31       -3.14073   0.00003  -0.00016   0.00253   0.00235  -3.13838
   D32       -0.74385   0.00061  -0.00024   0.06827   0.06827  -0.67558
   D33        2.44897   0.00023  -0.00077   0.04653   0.04595   2.49492
   D34        1.30933   0.00059  -0.00009   0.06773   0.06739   1.37672
   D35       -1.78103   0.00021  -0.00063   0.04599   0.04507  -1.73596
   D36       -2.93915   0.00078   0.00009   0.07044   0.07074  -2.86841
   D37        0.25368   0.00040  -0.00044   0.04870   0.04842   0.30209
   D38       -1.85364   0.00002   0.00034   0.00138   0.00172  -1.85191
   D39        1.31772  -0.00040  -0.00020  -0.02322  -0.02342   1.29430
   D40        0.28100   0.00003   0.00014   0.00334   0.00348   0.28448
   D41       -2.83083  -0.00038  -0.00041  -0.02127  -0.02167  -2.85249
   D42        2.32957   0.00036   0.00033   0.00568   0.00600   2.33557
   D43       -0.78226  -0.00006  -0.00022  -0.01893  -0.01914  -0.80140
   D44       -0.08318   0.00028   0.00034   0.01420   0.01459  -0.06859
   D45       -3.11074  -0.00070   0.00102  -0.03078  -0.02978  -3.14052
   D46        3.10881  -0.00012  -0.00018  -0.00713  -0.00730   3.10151
   D47        0.08125  -0.00110   0.00049  -0.05212  -0.05167   0.02958
   D48       -3.07496  -0.00031   0.00068  -0.01208  -0.01140  -3.08636
   D49       -0.21726   0.00013   0.00047   0.00635   0.00683  -0.21043
   D50        0.09617  -0.00071   0.00014  -0.03647  -0.03634   0.05983
   D51        2.95386  -0.00027  -0.00007  -0.01804  -0.01811   2.93575
   D52       -3.06167  -0.00092   0.00078  -0.04466  -0.04383  -3.10550
   D53       -0.03974   0.00015   0.00006   0.00293   0.00295  -0.03679
   D54        3.14015   0.00002   0.00004   0.00022   0.00030   3.14045
   D55        0.01448  -0.00015   0.00021  -0.00905  -0.00889   0.00559
   D56       -3.13850  -0.00004  -0.00018  -0.00010  -0.00027  -3.13877
   D57        0.00131   0.00000  -0.00007   0.00098   0.00090   0.00221
   D58       -3.14009   0.00004   0.00001   0.00234   0.00235  -3.13774
   D59        0.00066   0.00006  -0.00001   0.00332   0.00331   0.00397
   D60        0.00319   0.00000  -0.00009   0.00132   0.00124   0.00443
   D61       -3.13924   0.00002  -0.00010   0.00230   0.00220  -3.13705
   D62        3.14040   0.00002  -0.00001   0.00101   0.00102   3.14142
   D63       -0.00134   0.00001   0.00000   0.00061   0.00062  -0.00073
   D64       -0.00043   0.00001   0.00001   0.00014   0.00015  -0.00028
   D65        3.14101   0.00000   0.00001  -0.00026  -0.00025   3.14076
   D66       -3.13978  -0.00003   0.00000  -0.00103  -0.00103  -3.14081
   D67        0.00079  -0.00003   0.00003  -0.00173  -0.00169  -0.00090
   D68        0.00097  -0.00001  -0.00002  -0.00004  -0.00006   0.00090
   D69        3.14153  -0.00001   0.00001  -0.00074  -0.00072   3.14081
   D70       -0.00019   0.00000   0.00000  -0.00003  -0.00003  -0.00022
   D71       -3.14141  -0.00001   0.00001  -0.00040  -0.00039   3.14138
   D72        3.14155   0.00001   0.00000   0.00038   0.00038  -3.14125
   D73        0.00033   0.00000   0.00000   0.00001   0.00001   0.00034
   D74        0.00030  -0.00001   0.00000  -0.00019  -0.00019   0.00011
   D75       -3.14116   0.00000   0.00000  -0.00006  -0.00006  -3.14123
   D76        3.14152   0.00000  -0.00001   0.00019   0.00018  -3.14149
   D77        0.00005   0.00001  -0.00001   0.00031   0.00031   0.00036
   D78        0.00023   0.00001  -0.00001   0.00029   0.00028   0.00051
   D79       -3.14143   0.00001   0.00000   0.00028   0.00028  -3.14115
   D80       -3.14148   0.00000  -0.00001   0.00016   0.00015  -3.14133
   D81        0.00004   0.00000   0.00000   0.00015   0.00015   0.00019
   D82       -0.00089   0.00000   0.00002  -0.00017  -0.00015  -0.00103
   D83       -3.14145   0.00001  -0.00001   0.00055   0.00055  -3.14090
   D84        3.14078   0.00000   0.00001  -0.00016  -0.00015   3.14063
   D85        0.00022   0.00001  -0.00001   0.00056   0.00055   0.00077
   D86        3.11285   0.00029  -0.00026   0.01949   0.01924   3.13209
   D87       -0.02976   0.00028  -0.00023   0.01879   0.01855  -0.01120
   D88        3.13579   0.00029   0.00007   0.00826   0.00833  -3.13906
   D89       -0.00556   0.00019   0.00024   0.00268   0.00293  -0.00264
   D90       -0.02246   0.00005   0.00006   0.00285   0.00292  -0.01954
   D91        3.12650  -0.00003   0.00011  -0.00111  -0.00100   3.12550
   D92        3.11891   0.00015  -0.00011   0.00816   0.00805   3.12696
   D93       -0.01533   0.00007  -0.00006   0.00419   0.00414  -0.01119
   D94       -3.13434  -0.00011   0.00008  -0.00521  -0.00513  -3.13948
   D95        0.00823  -0.00010   0.00006  -0.00480  -0.00474   0.00348
   D96       -0.00018  -0.00003   0.00003  -0.00121  -0.00118  -0.00136
   D97       -3.14080  -0.00002   0.00001  -0.00080  -0.00079  -3.14159
   D98        3.13539   0.00007  -0.00006   0.00396   0.00391   3.13929
   D99       -0.00431   0.00004  -0.00001   0.00199   0.00199  -0.00232
   D100       0.00057   0.00001  -0.00001   0.00032   0.00031   0.00088
   D101      -3.13912  -0.00003   0.00004  -0.00165  -0.00161  -3.14073
   D102       0.00002   0.00003  -0.00003   0.00126   0.00123   0.00125
   D103       3.14106   0.00003  -0.00003   0.00144   0.00142  -3.14071
   D104       3.14061   0.00002  -0.00001   0.00084   0.00083   3.14144
   D105      -0.00153   0.00002  -0.00001   0.00102   0.00102  -0.00052
   D106      -3.11213  -0.00019   0.00021  -0.00863  -0.00842  -3.12055
   D107       0.03046  -0.00018   0.00019  -0.00822  -0.00802   0.02243
   D108      -0.00022  -0.00001   0.00001  -0.00038  -0.00037  -0.00059
   D109       3.14113   0.00000   0.00000   0.00009   0.00008   3.14122
   D110      -3.14126  -0.00001   0.00001  -0.00057  -0.00056   3.14137
   D111       0.00010   0.00000  -0.00001  -0.00010  -0.00011  -0.00001
   D112       0.00059  -0.00001   0.00001  -0.00052  -0.00051   0.00008
   D113       3.14110   0.00001  -0.00003   0.00086   0.00083  -3.14125
   D114      -3.14076  -0.00002   0.00002  -0.00099  -0.00097   3.14146
   D115      -0.00026   0.00001  -0.00001   0.00039   0.00038   0.00012
   D116      -0.00078   0.00001  -0.00001   0.00054   0.00054  -0.00025
   D117       3.13889   0.00005  -0.00006   0.00254   0.00248   3.14137
   D118      -3.14129  -0.00002   0.00003  -0.00083  -0.00080   3.14109
   D119      -0.00162   0.00002  -0.00002   0.00117   0.00114  -0.00048
   D120       3.10324  -0.00062   0.00104  -0.03769  -0.03665   3.06659
   D121       0.24915  -0.00106   0.00120  -0.05604  -0.05485   0.19430
   D122       3.13863  -0.00027   0.00010  -0.01141  -0.01131   3.12732
   D123      -0.01489   0.00017   0.00029   0.00568   0.00598  -0.00891
   D124       3.14110   0.00035   0.00037   0.01250   0.01287  -3.12921
   D125       0.00463   0.00018   0.00044   0.00418   0.00461   0.00924
   D126       0.01100  -0.00009   0.00019  -0.00398  -0.00379   0.00721
   D127      -3.12547  -0.00025   0.00026  -0.01230  -0.01204  -3.13752
   D128      -3.13626  -0.00020   0.00000  -0.00914  -0.00913   3.13779
   D129       0.00442  -0.00012   0.00002  -0.00623  -0.00621  -0.00178
   D130       0.00037  -0.00004  -0.00006  -0.00106  -0.00113  -0.00076
   D131       3.14105   0.00003  -0.00004   0.00184   0.00180  -3.14033
   D132       3.13443   0.00023   0.00003   0.01036   0.01039  -3.13837
   D133      -0.00888   0.00037   0.00015   0.01521   0.01536   0.00648
   D134      -0.00208   0.00007   0.00009   0.00209   0.00219   0.00011
   D135       3.13780   0.00020   0.00021   0.00694   0.00716  -3.13823
   D136       0.00112  -0.00001  -0.00001  -0.00035  -0.00036   0.00077
   D137      -3.14131   0.00002   0.00001   0.00087   0.00088  -3.14043
   D138      -3.13954  -0.00008  -0.00002  -0.00331  -0.00333   3.14031
   D139       0.00120  -0.00005  -0.00001  -0.00209  -0.00209  -0.00089
   D140      -0.00090   0.00003   0.00004   0.00074   0.00078  -0.00012
   D141      -3.14141  -0.00001   0.00001  -0.00035  -0.00034   3.14144
   D142       3.14154  -0.00001   0.00002  -0.00048  -0.00046   3.14108
   D143       0.00103  -0.00004  -0.00001  -0.00157  -0.00158  -0.00055
   D144      -0.00083   0.00000  -0.00001   0.00032   0.00031  -0.00052
   D145      -3.13972  -0.00008  -0.00006  -0.00269  -0.00275   3.14072
   D146       3.13968   0.00004   0.00002   0.00140   0.00142   3.14110
   D147       0.00079  -0.00004  -0.00003  -0.00161  -0.00163  -0.00084
   D148       0.00233  -0.00005  -0.00006  -0.00174  -0.00180   0.00052
   D149      -3.13763  -0.00018  -0.00017  -0.00638  -0.00656   3.13899
   D150       3.14130   0.00003  -0.00001   0.00117   0.00116  -3.14073
   D151       0.00134  -0.00010  -0.00013  -0.00347  -0.00360  -0.00226
   D152      -0.00914   0.00040   0.00003   0.01333   0.01337   0.00423
   D153       3.13076   0.00053   0.00015   0.01813   0.01827  -3.13415
         Item               Value     Threshold  Converged?
 Maximum Force            0.017033     0.000450     NO 
 RMS     Force            0.001579     0.000300     NO 
 Maximum Displacement     0.693743     0.001800     NO 
 RMS     Displacement     0.179794     0.001200     NO 
 Predicted change in Energy=-1.756854D-03
 GradGradGradGradGradGradGradGradGradGradGradGradGradGradGradGradGradGrad

 Leave Link  103 at Thu Oct 13 22:47:58 2016, MaxMem= 1342177280 cpu:     161.9
 (Enter /opt/software/g09/l202.exe)
 Stoichiometry    C27H26N6O7
 Framework group  C1[X(C27H26N6O7)]
 Deg. of freedom   192
 Full point group                 C1      NOp   1
 Largest Abelian subgroup         C1      NOp   1
 Largest concise Abelian subgroup C1      NOp   1
                         Standard orientation:                         
 ---------------------------------------------------------------------
 Center     Atomic      Atomic             Coordinates (Angstroms)
 Number     Number       Type             X           Y           Z
 ---------------------------------------------------------------------
      1          8           0        0.820617   -1.456933   -0.558551
      2          6           0        0.822572   -0.239021    0.179104
      3          6           0        2.279475    0.148791    0.539121
      4          6           0        0.262586    0.933570   -0.671239
      5          6           0        0.075308   -0.435564    1.527430
      6          8           0        2.520734    1.103368    1.272130
      7          6           0       -1.074856    0.616056   -1.307784
      8          6           0       -1.382032   -0.849720    1.390768
      9          8           0       -2.325167   -0.095817    1.601048
     10          8           0       -1.317462   -0.513114   -1.769053
     11          7           0       -2.006939    1.598756   -1.401491
     12          7           0        3.207689   -0.652094   -0.043535
     13          7           0        4.543784   -0.438856    0.171069
     14          6           0        5.341461   -1.255863   -0.427241
     15          6           0        6.799302   -1.226976   -0.345607
     16          6           0        7.497331   -2.208354   -1.081012
     17          6           0        8.885583   -2.284508   -1.084208
     18          6           0        9.619654   -1.360069   -0.335618
     19          6           0        8.960674   -0.377658    0.402003
     20          6           0        7.563443   -0.302926    0.404687
     21          7           0       -1.821141    2.846873   -0.875016
     22          6           0       -2.807661    3.664682   -1.003874
     23          6           0       -2.821316    5.041370   -0.520084
     24          6           0       -1.763531    5.675049    0.181145
     25          6           0       -1.901091    7.005669    0.595782
     26          6           0       -3.067815    7.719238    0.329700
     27          6           0       -4.122038    7.112464   -0.359366
     28          6           0       -3.987725    5.792006   -0.772518
     29          8           0       -0.630014    4.972637    0.436178
     30          7           0       -1.540473   -2.164013    1.010980
     31          7           0       -2.787610   -2.661348    0.785190
     32          6           0       -2.905263   -3.871181    0.349265
     33          6           0       -4.218367   -4.448063    0.111523
     34          6           0       -4.318155   -5.775193   -0.349838
     35          6           0       -5.552067   -6.367872   -0.585945
     36          6           0       -6.721191   -5.627337   -0.360467
     37          6           0       -6.654143   -4.313821    0.094533
     38          6           0       -5.412491   -3.708481    0.336033
     39          8           0       -5.400377   -2.431239    0.773801
     40          1           0        0.122249   -1.354748   -1.249440
     41          1           0        0.956684    1.103218   -1.503965
     42          1           0        0.223048    1.849087   -0.085205
     43          1           0        0.110401    0.490258    2.101508
     44          1           0        0.616408   -1.206896    2.085707
     45          1           0       -2.893498    1.339159   -1.836620
     46          1           0        2.858519   -1.409590   -0.633399
     47          1           0        4.942149   -2.058260   -1.062260
     48          1           0        9.388557   -3.053048   -1.661630
     49          1           0       10.704525   -1.399419   -0.322872
     50          1           0        9.530220    0.342139    0.984272
     51          1           0       -3.726693    3.349100   -1.512684
     52          1           0       -1.081322    7.478027    1.131550
     53          1           0       -3.149563    8.749576    0.662246
     54          1           0       -5.033547    7.661462   -0.570649
     55          1           0       -4.801661    5.311429   -1.308623
     56          1           0       -0.016671    5.532789    0.934244
     57          1           0       -0.724298   -2.674699    0.679374
     58          1           0       -2.029550   -4.497571    0.151148
     59          1           0       -3.402169   -6.335609   -0.518397
     60          1           0       -5.609138   -7.391743   -0.940225
     61          1           0       -7.692370   -6.078829   -0.541284
     62          1           0       -7.553283   -3.731946    0.271346
     63          1           0       -4.457730   -2.151413    0.888187
     64          8           0        6.915545    0.649726    1.118594
     65          1           0        7.576286    1.190881    1.577928
     66          1           0        6.918380   -2.925326   -1.661581
 ---------------------------------------------------------------------
 Rotational constants (GHZ):      0.0700260      0.0429858      0.0278413
 Leave Link  202 at Thu Oct 13 22:47:58 2016, MaxMem= 1342177280 cpu:       0.8
 (Enter /opt/software/g09/l301.exe)
 Basis read from rwf:  (5D, 7F)
 Pseudo-potential data read from rwf file.
 There are   690 symmetry adapted basis functions of A   symmetry.
 Integral buffers will be    131072 words long.
 Raffenetti 2 integral format.
 Two-electron integral symmetry is turned on.
   690 basis functions,  1302 primitive gaussians,   730 cartesian basis functions
   143 alpha electrons      143 beta electrons
       nuclear repulsion energy      4150.4765746034 Hartrees.
 IExCor=  402 DFT=T Ex+Corr=B3LYP ExCW=0 ScaHFX=  0.200000
 ScaDFX=  0.800000  0.720000  1.000000  0.810000 ScalE2=  1.000000  1.000000
 IRadAn=      0 IRanWt=     -1 IRanGd=            0 ICorTp=0
 NAtoms=   66 NActive=   66 NUniq=   66 SFac= 1.00D+00 NAtFMM=   50 NAOKFM=T Big=T
 No density basis found on file   724.
 ------------------------------------------------------------------------------
 Polarizable Continuum Model (PCM)
 =================================
 Model                : PCM.
 Atomic radii         : UFF (Universal Force Field).
 Polarization charges : Total charges.
 Charge compensation  : None.
 Solution method      : Matrix inversion.
 Cavity type          : Scaled VdW (van der Waals Surface) (Alpha=1.100).
 Cavity algorithm     : GePol (No added spheres)
                        Default sphere list used, NSphG=   66.
                        Lebedev-Laikov grids with approx.  5.0 points / Ang**2.
                        Smoothing algorithm: Karplus/York (Gamma=1.0000).
                        Polarization charges: spherical gaussians, with
                                              point-specific exponents (IZeta= 3).
                        Self-potential: point-specific (ISelfS= 7).
                        Self-field    : sphere-specific E.n sum rule (ISelfD= 2).
 1st derivatives      : Analytical E(r).r(x)/FMM algorithm (CHGder, D1EAlg=3).
                        Cavity 1st derivative terms included.
 Solvent              : Water, Eps=  78.355300 Eps(inf)=   1.777849
 ------------------------------------------------------------------------------
 GePol: Number of generator spheres                  =      66
 GePol: Total number of spheres                      =      66
 GePol: Number of exposed spheres                    =      66 (100.00%)
 GePol: Number of points                             =    4973
 GePol: Average weight of points                     =       0.13
 GePol: Minimum weight of points                     =   0.37D-10
 GePol: Maximum weight of points                     =    0.20577
 GePol: Number of points with low weight             =     307
 GePol: Fraction of low-weight points (<1% of avg)   =       6.17%
 GePol: Cavity surface area                          =    643.468 Ang**2
 GePol: Cavity volume                                =    713.806 Ang**3
 Leave Link  301 at Thu Oct 13 22:47:59 2016, MaxMem= 1342177280 cpu:       1.9
 (Enter /opt/software/g09/linda-exe/l302.exel)
 NPDir=0 NMtPBC=     1 NCelOv=     1 NCel=       1 NClECP=     1 NCelD=      1
         NCelK=      1 NCelE2=     1 NClLst=     1 CellRange=     0.0.
 One-electron integrals computed using PRISM.
   1 Symmetry operations used in ECPInt.
 ECPInt:  NShTT=   28441 NPrTT=  163533 LenC2=   15421 LenP2D=   47411.
 LDataN:  DoStor=T MaxTD1= 4 Len=   56
 NBasis=   690 RedAO= T  NBF=   690
 NBsUse=   690 1.00D-06 NBFU=   690
 Precomputing XC quadrature grid using
 IXCGrd= 2 IRadAn=           0 IRanWt=          -1 IRanGd=           0 AccXCQ= 0.00D+00.
 NRdTot=    4293 NPtTot=      549392 NUsed=      580314 NTot=      580346
 NSgBfM=   602   602   605   612   612 NAtAll=    66    66.
 Leave Link  302 at Thu Oct 13 22:48:04 2016, MaxMem= 1342177280 cpu:      90.9
 (Enter /opt/software/g09/l303.exe)
 DipDrv:  MaxL=1.
 Leave Link  303 at Thu Oct 13 22:48:04 2016, MaxMem= 1342177280 cpu:       3.9
 (Enter /opt/software/g09/linda-exe/l401.exel)
 Initial guess read from the read-write file.
 B after Tr=     0.000000    0.000000    0.000000
         Rot=    1.000000    0.000000    0.000000    0.000000 Ang=   0.00 deg.
 Guess basis will be translated and rotated to current coordinates.
 Initial guess orbital symmetries:
 Alpha Orbitals:
       Occupied  (A) (A) (A) (A) (A) (A) (A) (A) (A) (A) (A) (A)
                 (A) (A) (A) (A) (A) (A) (A) (A) (A) (A) (A) (A)
                 (A) (A) (A) (A) (A) (A) (A) (A) (A) (A) (A) (A)
                 (A) (A) (A) (A) (A) (A) (A) (A) (A) (A) (A) (A)
                 (A) (A) (A) (A) (A) (A) (A) (A) (A) (A) (A) (A)
                 (A) (A) (A) (A) (A) (A) (A) (A) (A) (A) (A) (A)
                 (A) (A) (A) (A) (A) (A) (A) (A) (A) (A) (A) (A)
                 (A) (A) (A) (A) (A) (A) (A) (A) (A) (A) (A) (A)
                 (A) (A) (A) (A) (A) (A) (A) (A) (A) (A) (A) (A)
                 (A) (A) (A) (A) (A) (A) (A) (A) (A) (A) (A) (A)
                 (A) (A) (A) (A) (A) (A) (A) (A) (A) (A) (A) (A)
                 (A) (A) (A) (A) (A) (A) (A) (A) (A) (A) (A)
       Virtual   (A) (A) (A) (A) (A) (A) (A) (A) (A) (A) (A) (A)
                 (A) (A) (A) (A) (A) (A) (A) (A) (A) (A) (A) (A)
                 (A) (A) (A) (A) (A) (A) (A) (A) (A) (A) (A) (A)
                 (A) (A) (A) (A) (A) (A) (A) (A) (A) (A) (A) (A)
                 (A) (A) (A) (A) (A) (A) (A) (A) (A) (A) (A) (A)
                 (A) (A) (A) (A) (A) (A) (A) (A) (A) (A) (A) (A)
                 (A) (A) (A) (A) (A) (A) (A) (A) (A) (A) (A) (A)
                 (A) (A) (A) (A) (A) (A) (A) (A) (A) (A) (A) (A)
                 (A) (A) (A) (A) (A) (A) (A) (A) (A) (A) (A) (A)
                 (A) (A) (A) (A) (A) (A) (A) (A) (A) (A) (A) (A)
                 (A) (A) (A) (A) (A) (A) (A) (A) (A) (A) (A) (A)
                 (A) (A) (A) (A) (A) (A) (A) (A) (A) (A) (A) (A)
                 (A) (A) (A) (A) (A) (A) (A) (A) (A) (A) (A) (A)
                 (A) (A) (A) (A) (A) (A) (A) (A) (A) (A) (A) (A)
                 (A) (A) (A) (A) (A) (A) (A) (A) (A) (A) (A) (A)
                 (A) (A) (A) (A) (A) (A) (A) (A) (A) (A) (A) (A)
                 (A) (A) (A) (A) (A) (A) (A) (A) (A) (A) (A) (A)
                 (A) (A) (A) (A) (A) (A) (A) (A) (A) (A) (A) (A)
                 (A) (A) (A) (A) (A) (A) (A) (A) (A) (A) (A) (A)
                 (A) (A) (A) (A) (A) (A) (A) (A) (A) (A) (A) (A)
                 (A) (A) (A) (A) (A) (A) (A) (A) (A) (A) (A) (A)
                 (A) (A) (A) (A) (A) (A) (A) (A) (A) (A) (A) (A)
                 (A) (A) (A) (A) (A) (A) (A) (A) (A) (A) (A) (A)
                 (A) (A) (A) (A) (A) (A) (A) (A) (A) (A) (A) (A)
                 (A) (A) (A) (A) (A) (A) (A) (A) (A) (A) (A) (A)
                 (A) (A) (A) (A) (A) (A) (A) (A) (A) (A) (A) (A)
                 (A) (A) (A) (A) (A) (A) (A) (A) (A) (A) (A) (A)
                 (A) (A) (A) (A) (A) (A) (A) (A) (A) (A) (A) (A)
                 (A) (A) (A) (A) (A) (A) (A) (A) (A) (A) (A) (A)
                 (A) (A) (A) (A) (A) (A) (A) (A) (A) (A) (A) (A)
                 (A) (A) (A) (A) (A) (A) (A) (A) (A) (A) (A) (A)
                 (A) (A) (A) (A) (A) (A) (A) (A) (A) (A) (A) (A)
                 (A) (A) (A) (A) (A) (A) (A) (A) (A) (A) (A) (A)
                 (A) (A) (A) (A) (A) (A) (A) (A) (A) (A) (A) (A)
                 (A) (A) (A) (A) (A) (A) (A) (A) (A) (A) (A) (A)
                 (A) (A) (A) (A) (A) (A) (A) (A) (A) (A) (A) (A)
                 (A) (A) (A) (A) (A) (A) (A) (A) (A) (A) (A) (A)
                 (A) (A) (A) (A) (A) (A) (A) (A) (A) (A) (A) (A)
                 (A) (A) (A) (A) (A) (A) (A) (A) (A) (A) (A) (A)
                 (A) (A) (A) (A) (A) (A) (A) (A) (A) (A) (A) (A)
                 (A) (A) (A) (A) (A) (A) (A) (A) (A) (A) (A) (A)
                 (A) (A) (A) (A) (A) (A) (A) (A) (A) (A) (A) (A)
                 (A) (A) (A) (A) (A) (A) (A) (A) (A) (A) (A) (A)
                 (A) (A) (A) (A) (A) (A) (A) (A) (A) (A) (A) (A)
                 (A) (A) (A) (A) (A) (A) (A) (A) (A) (A) (A) (A)
                 (A) (A) (A) (A) (A) (A) (A)
 Beta  Orbitals:
       Occupied  (A) (A) (A) (A) (A) (A) (A) (A) (A) (A) (A) (A)
                 (A) (A) (A) (A) (A) (A) (A) (A) (A) (A) (A) (A)
                 (A) (A) (A) (A) (A) (A) (A) (A) (A) (A) (A) (A)
                 (A) (A) (A) (A) (A) (A) (A) (A) (A) (A) (A) (A)
                 (A) (A) (A) (A) (A) (A) (A) (A) (A) (A) (A) (A)
                 (A) (A) (A) (A) (A) (A) (A) (A) (A) (A) (A) (A)
                 (A) (A) (A) (A) (A) (A) (A) (A) (A) (A) (A) (A)
                 (A) (A) (A) (A) (A) (A) (A) (A) (A) (A) (A) (A)
                 (A) (A) (A) (A) (A) (A) (A) (A) (A) (A) (A) (A)
                 (A) (A) (A) (A) (A) (A) (A) (A) (A) (A) (A) (A)
                 (A) (A) (A) (A) (A) (A) (A) (A) (A) (A) (A) (A)
                 (A) (A) (A) (A) (A) (A) (A) (A) (A) (A) (A)
       Virtual   (A) (A) (A) (A) (A) (A) (A) (A) (A) (A) (A) (A)
                 (A) (A) (A) (A) (A) (A) (A) (A) (A) (A) (A) (A)
                 (A) (A) (A) (A) (A) (A) (A) (A) (A) (A) (A) (A)
                 (A) (A) (A) (A) (A) (A) (A) (A) (A) (A) (A) (A)
                 (A) (A) (A) (A) (A) (A) (A) (A) (A) (A) (A) (A)
                 (A) (A) (A) (A) (A) (A) (A) (A) (A) (A) (A) (A)
                 (A) (A) (A) (A) (A) (A) (A) (A) (A) (A) (A) (A)
                 (A) (A) (A) (A) (A) (A) (A) (A) (A) (A) (A) (A)
                 (A) (A) (A) (A) (A) (A) (A) (A) (A) (A) (A) (A)
                 (A) (A) (A) (A) (A) (A) (A) (A) (A) (A) (A) (A)
                 (A) (A) (A) (A) (A) (A) (A) (A) (A) (A) (A) (A)
                 (A) (A) (A) (A) (A) (A) (A) (A) (A) (A) (A) (A)
                 (A) (A) (A) (A) (A) (A) (A) (A) (A) (A) (A) (A)
                 (A) (A) (A) (A) (A) (A) (A) (A) (A) (A) (A) (A)
                 (A) (A) (A) (A) (A) (A) (A) (A) (A) (A) (A) (A)
                 (A) (A) (A) (A) (A) (A) (A) (A) (A) (A) (A) (A)
                 (A) (A) (A) (A) (A) (A) (A) (A) (A) (A) (A) (A)
                 (A) (A) (A) (A) (A) (A) (A) (A) (A) (A) (A) (A)
                 (A) (A) (A) (A) (A) (A) (A) (A) (A) (A) (A) (A)
                 (A) (A) (A) (A) (A) (A) (A) (A) (A) (A) (A) (A)
                 (A) (A) (A) (A) (A) (A) (A) (A) (A) (A) (A) (A)
                 (A) (A) (A) (A) (A) (A) (A) (A) (A) (A) (A) (A)
                 (A) (A) (A) (A) (A) (A) (A) (A) (A) (A) (A) (A)
                 (A) (A) (A) (A) (A) (A) (A) (A) (A) (A) (A) (A)
                 (A) (A) (A) (A) (A) (A) (A) (A) (A) (A) (A) (A)
                 (A) (A) (A) (A) (A) (A) (A) (A) (A) (A) (A) (A)
                 (A) (A) (A) (A) (A) (A) (A) (A) (A) (A) (A) (A)
                 (A) (A) (A) (A) (A) (A) (A) (A) (A) (A) (A) (A)
                 (A) (A) (A) (A) (A) (A) (A) (A) (A) (A) (A) (A)
                 (A) (A) (A) (A) (A) (A) (A) (A) (A) (A) (A) (A)
                 (A) (A) (A) (A) (A) (A) (A) (A) (A) (A) (A) (A)
                 (A) (A) (A) (A) (A) (A) (A) (A) (A) (A) (A) (A)
                 (A) (A) (A) (A) (A) (A) (A) (A) (A) (A) (A) (A)
                 (A) (A) (A) (A) (A) (A) (A) (A) (A) (A) (A) (A)
                 (A) (A) (A) (A) (A) (A) (A) (A) (A) (A) (A) (A)
                 (A) (A) (A) (A) (A) (A) (A) (A) (A) (A) (A) (A)
                 (A) (A) (A) (A) (A) (A) (A) (A) (A) (A) (A) (A)
                 (A) (A) (A) (A) (A) (A) (A) (A) (A) (A) (A) (A)
                 (A) (A) (A) (A) (A) (A) (A) (A) (A) (A) (A) (A)
                 (A) (A) (A) (A) (A) (A) (A) (A) (A) (A) (A) (A)
                 (A) (A) (A) (A) (A) (A) (A) (A) (A) (A) (A) (A)
                 (A) (A) (A) (A) (A) (A) (A) (A) (A) (A) (A) (A)
                 (A) (A) (A) (A) (A) (A) (A) (A) (A) (A) (A) (A)
                 (A) (A) (A) (A) (A) (A) (A) (A) (A) (A) (A) (A)
                 (A) (A) (A) (A) (A) (A) (A) (A) (A) (A) (A) (A)
                 (A) (A) (A) (A) (A) (A) (A)
 The electronic state of the initial guess is 1-A.
 Initial guess <Sx>= 0.0000 <Sy>= 0.0000 <Sz>= 0.0000 <S**2>= 0.0000 S= 0.0000
 Generating alternative initial guess.
 Harris functional with IExCor=  402 diagonalized for initial guess.
 ExpMin= 1.61D-01 ExpMax= 5.48D+03 ExpMxC= 8.25D+02 IAcc=1 IRadAn=         1 AccDes= 0.00D+00
 HarFok:  IExCor=  402 AccDes= 0.00D+00 IRadAn=         1 IDoV= 1
 ScaDFX=  1.000000  1.000000  1.000000  1.000000
 FoFCou: FMM=F IPFlag=           0 FMFlag=      100000 FMFlg1=        2001
         NFxFlg=           0 DoJE=T BraDBF=F KetDBF=T FulRan=T
         Omega=  0.000000  0.000000  1.000000  0.000000  0.000000 ICntrl=     500 IOpCl=  0
         NMat0=    1 NMatS0=    1 NMatT0=    0 NMatD0=    1 NMtDS0=    0 NMtDT0=    0
         I1Cent=           4 NGrid=           0.
 Petite list used in FoFCou.
 Harris En= -1899.42677441009    
 Leave Link  401 at Thu Oct 13 22:48:17 2016, MaxMem= 1342177280 cpu:     221.4
 (Enter /opt/software/g09/linda-exe/l502.exel)
 UHF open shell SCF:
 Requested convergence on RMS density matrix=1.00D-08 within 600 cycles.
 Requested convergence on MAX density matrix=1.00D-06.
 Requested convergence on             energy=1.00D-06.
 No special actions if energy rises.
 Using DIIS extrapolation, IDIIS=  1040.
 Integral symmetry usage will be decided dynamically.
       579707 words used for storage of precomputed grid.
 IEnd=     2562569 IEndB=     2562569 NGot=  1342177280 MDV=  1340509542
 LenX=  1340509542 LenY=  1339975912
 Fock matrices will be formed incrementally for  20 cycles.

 Cycle   1  Pass 1  IDiag  1:
 FoFCou: FMM=T IPFlag=           0 FMFlag=      100000 FMFlg1=        2001
         NFxFlg=           0 DoJE=F BraDBF=F KetDBF=F FulRan=T
         Omega=  0.000000  0.000000  1.000000  0.000000  0.000000 ICntrl=       0 IOpCl=  1
         NMat0=    1 NMatS0=    1 NMatT0=    0 NMatD0=    1 NMtDS0=    0 NMtDT0=    0
         I1Cent=           0 NGrid=           0.
 Symmetry not used in FoFCou.
 FMM levels:  10  Number of levels for PrismC:   9
 E= -1857.54728606082    
 DIIS: error= 7.04D-02 at cycle   1 NSaved=   1.
 NSaved= 1 IEnMin= 1 EnMin= -1857.54728606082     IErMin= 1 ErrMin= 7.04D-02
 ErrMax= 7.04D-02 EMaxC= 1.00D-01 BMatC= 5.66D+01 BMatP= 5.66D+01
 IDIUse=3 WtCom= 2.96D-01 WtEn= 7.04D-01
 Coeff-Com:  0.100D+01
 Coeff-En:   0.100D+01
 Coeff:      0.100D+01
 Recover alternate guess density for next cycle.
 RMSDP=1.41D-02 MaxDP=6.35D-01              OVMax= 0.00D+00

 Cycle   2  Pass 1  IDiag  1:
 RMSU=  7.11D-03    CP:  4.48D-01
 E= -1898.82687855428     Delta-E=      -41.279592493461 Rises=F Damp=F
 DIIS: error= 2.41D-02 at cycle   2 NSaved=   2.
 NSaved= 2 IEnMin= 2 EnMin= -1898.82687855428     IErMin= 2 ErrMin= 2.41D-02
 ErrMax= 2.41D-02 EMaxC= 1.00D-01 BMatC= 3.16D+00 BMatP= 5.66D+01
 IDIUse=3 WtCom= 7.59D-01 WtEn= 2.41D-01
 Coeff-Com:  0.174D-01 0.983D+00
 Coeff-En:   0.000D+00 0.100D+01
 Coeff:      0.132D-01 0.987D+00
 Gap=     0.198 Goal=   None    Shift=    0.000
 Gap=     0.198 Goal=   None    Shift=    0.000
 RMSDP=3.10D-03 MaxDP=2.28D-01 DE=-4.13D+01 OVMax= 2.46D-01

 Cycle   3  Pass 1  IDiag  1:
 RMSU=  2.18D-03    CP:  4.41D-01  9.70D-01
 E= -1898.16953299602     Delta-E=        0.657345558264 Rises=F Damp=F
 DIIS: error= 3.34D-02 at cycle   3 NSaved=   3.
 NSaved= 3 IEnMin= 2 EnMin= -1898.82687855428     IErMin= 2 ErrMin= 2.41D-02
 ErrMax= 3.34D-02 EMaxC= 1.00D-01 BMatC= 6.62D+00 BMatP= 3.16D+00
 IDIUse=2 WtCom= 0.00D+00 WtEn= 1.00D+00
 Coeff-En:   0.000D+00 0.642D+00 0.358D+00
 Coeff:      0.000D+00 0.642D+00 0.358D+00
 Gap=     0.169 Goal=   None    Shift=    0.000
 Gap=     0.169 Goal=   None    Shift=    0.000
 RMSDP=1.88D-03 MaxDP=1.66D-01 DE= 6.57D-01 OVMax= 1.78D-01

 Cycle   4  Pass 1  IDiag  1:
 RMSU=  5.81D-04    CP:  4.40D-01  9.76D-01  4.54D-01
 E= -1899.53293471423     Delta-E=       -1.363401718211 Rises=F Damp=F
 DIIS: error= 5.58D-03 at cycle   4 NSaved=   4.
 NSaved= 4 IEnMin= 4 EnMin= -1899.53293471423     IErMin= 4 ErrMin= 5.58D-03
 ErrMax= 5.58D-03 EMaxC= 1.00D-01 BMatC= 2.60D-01 BMatP= 3.16D+00
 IDIUse=3 WtCom= 9.44D-01 WtEn= 5.58D-02
 Coeff-Com:  0.565D-03 0.286D+00 0.190D+00 0.524D+00
 Coeff-En:   0.000D+00 0.000D+00 0.000D+00 0.100D+01
 Coeff:      0.534D-03 0.270D+00 0.179D+00 0.551D+00
 Gap=     0.161 Goal=   None    Shift=    0.000
 Gap=     0.161 Goal=   None    Shift=    0.000
 RMSDP=4.64D-04 MaxDP=3.18D-02 DE=-1.36D+00 OVMax= 3.87D-02

 Cycle   5  Pass 1  IDiag  1:
 RMSU=  2.22D-04    CP:  4.42D-01  9.79D-01  4.42D-01  5.90D-01
 E= -1899.58734651153     Delta-E=       -0.054411797297 Rises=F Damp=F
 DIIS: error= 2.84D-03 at cycle   5 NSaved=   5.
 NSaved= 5 IEnMin= 5 EnMin= -1899.58734651153     IErMin= 5 ErrMin= 2.84D-03
 ErrMax= 2.84D-03 EMaxC= 1.00D-01 BMatC= 3.77D-02 BMatP= 2.60D-01
 IDIUse=3 WtCom= 9.72D-01 WtEn= 2.84D-02
 Coeff-Com: -0.527D-03 0.625D-01 0.314D-01 0.287D+00 0.620D+00
 Coeff-En:   0.000D+00 0.000D+00 0.000D+00 0.669D-01 0.933D+00
 Coeff:     -0.512D-03 0.607D-01 0.305D-01 0.280D+00 0.629D+00
 Gap=     0.160 Goal=   None    Shift=    0.000
 Gap=     0.160 Goal=   None    Shift=    0.000
 RMSDP=1.48D-04 MaxDP=1.27D-02 DE=-5.44D-02 OVMax= 1.69D-02

 Cycle   6  Pass 1  IDiag  1:
 RMSU=  6.83D-05    CP:  4.42D-01  9.79D-01  4.33D-01  6.69D-01  7.26D-01
 E= -1899.59418964221     Delta-E=       -0.006843130683 Rises=F Damp=F
 DIIS: error= 8.55D-04 at cycle   6 NSaved=   6.
 NSaved= 6 IEnMin= 6 EnMin= -1899.59418964221     IErMin= 6 ErrMin= 8.55D-04
 ErrMax= 8.55D-04 EMaxC= 1.00D-01 BMatC= 4.24D-03 BMatP= 3.77D-02
 IDIUse=3 WtCom= 9.91D-01 WtEn= 8.55D-03
 Coeff-Com: -0.111D-03 0.102D-01 0.117D-03 0.113D+00 0.354D+00 0.522D+00
 Coeff-En:   0.000D+00 0.000D+00 0.000D+00 0.000D+00 0.467D-01 0.953D+00
 Coeff:     -0.110D-03 0.101D-01 0.116D-03 0.112D+00 0.352D+00 0.526D+00
 Gap=     0.160 Goal=   None    Shift=    0.000
 Gap=     0.160 Goal=   None    Shift=    0.000
 RMSDP=5.66D-05 MaxDP=3.52D-03 DE=-6.84D-03 OVMax= 7.12D-03

 Cycle   7  Pass 1  IDiag  1:
 RMSU=  2.15D-05    CP:  4.42D-01  9.79D-01  4.34D-01  6.75D-01  7.55D-01
                    CP:  5.20D-01
 E= -1899.59516086882     Delta-E=       -0.000971226613 Rises=F Damp=F
 DIIS: error= 2.84D-04 at cycle   7 NSaved=   7.
 NSaved= 7 IEnMin= 7 EnMin= -1899.59516086882     IErMin= 7 ErrMin= 2.84D-04
 ErrMax= 2.84D-04 EMaxC= 1.00D-01 BMatC= 3.13D-04 BMatP= 4.24D-03
 IDIUse=3 WtCom= 9.97D-01 WtEn= 2.84D-03
 Coeff-Com: -0.301D-05 0.479D-03-0.268D-02 0.375D-01 0.132D+00 0.283D+00
 Coeff-Com:  0.549D+00
 Coeff-En:   0.000D+00 0.000D+00 0.000D+00 0.000D+00 0.000D+00 0.000D+00
 Coeff-En:   0.100D+01
 Coeff:     -0.300D-05 0.478D-03-0.267D-02 0.374D-01 0.132D+00 0.283D+00
 Coeff:      0.550D+00
 Gap=     0.160 Goal=   None    Shift=    0.000
 Gap=     0.160 Goal=   None    Shift=    0.000
 RMSDP=1.47D-05 MaxDP=1.01D-03 DE=-9.71D-04 OVMax= 2.07D-03

 Cycle   8  Pass 1  IDiag  1:
 RMSU=  5.94D-06    CP:  4.42D-01  9.79D-01  4.34D-01  6.76D-01  7.59D-01
                    CP:  5.84D-01  6.66D-01
 E= -1899.59523352439     Delta-E=       -0.000072655565 Rises=F Damp=F
 DIIS: error= 6.18D-05 at cycle   8 NSaved=   8.
 NSaved= 8 IEnMin= 8 EnMin= -1899.59523352439     IErMin= 8 ErrMin= 6.18D-05
 ErrMax= 6.18D-05 EMaxC= 1.00D-01 BMatC= 2.88D-05 BMatP= 3.13D-04
 IDIUse=1 WtCom= 1.00D+00 WtEn= 0.00D+00
 Coeff-Com: -0.786D-05-0.418D-03-0.161D-02 0.131D-01 0.478D-01 0.124D+00
 Coeff-Com:  0.314D+00 0.504D+00
 Coeff:     -0.786D-05-0.418D-03-0.161D-02 0.131D-01 0.478D-01 0.124D+00
 Coeff:      0.314D+00 0.504D+00
 Gap=     0.160 Goal=   None    Shift=    0.000
 Gap=     0.160 Goal=   None    Shift=    0.000
 RMSDP=4.20D-06 MaxDP=3.91D-04 DE=-7.27D-05 OVMax= 5.31D-04

 Cycle   9  Pass 1  IDiag  1:
 RMSU=  1.78D-06    CP:  4.42D-01  9.79D-01  4.34D-01  6.76D-01  7.59D-01
                    CP:  5.85D-01  6.93D-01  6.15D-01
 E= -1899.59523919906     Delta-E=       -0.000005674674 Rises=F Damp=F
 DIIS: error= 2.42D-05 at cycle   9 NSaved=   9.
 NSaved= 9 IEnMin= 9 EnMin= -1899.59523919906     IErMin= 9 ErrMin= 2.42D-05
 ErrMax= 2.42D-05 EMaxC= 1.00D-01 BMatC= 3.47D-06 BMatP= 2.88D-05
 IDIUse=1 WtCom= 1.00D+00 WtEn= 0.00D+00
 Coeff-Com: -0.140D-05-0.337D-03-0.839D-03 0.490D-02 0.177D-01 0.528D-01
 Coeff-Com:  0.148D+00 0.309D+00 0.469D+00
 Coeff:     -0.140D-05-0.337D-03-0.839D-03 0.490D-02 0.177D-01 0.528D-01
 Coeff:      0.148D+00 0.309D+00 0.469D+00
 Gap=     0.160 Goal=   None    Shift=    0.000
 Gap=     0.160 Goal=   None    Shift=    0.000
 RMSDP=1.36D-06 MaxDP=1.50D-04 DE=-5.67D-06 OVMax= 1.89D-04

 Cycle  10  Pass 1  IDiag  1:
 RMSU=  6.07D-07    CP:  4.42D-01  9.79D-01  4.34D-01  6.77D-01  7.59D-01
                    CP:  5.86D-01  6.95D-01  6.57D-01  6.30D-01
 E= -1899.59523988799     Delta-E=       -0.000000688933 Rises=F Damp=F
 DIIS: error= 8.35D-06 at cycle  10 NSaved=  10.
 NSaved=10 IEnMin=10 EnMin= -1899.59523988799     IErMin=10 ErrMin= 8.35D-06
 ErrMax= 8.35D-06 EMaxC= 1.00D-01 BMatC= 2.27D-07 BMatP= 3.47D-06
 IDIUse=1 WtCom= 1.00D+00 WtEn= 0.00D+00
 Coeff-Com:  0.104D-05-0.921D-04-0.180D-03 0.429D-03 0.107D-02 0.696D-02
 Coeff-Com:  0.229D-01 0.655D-01 0.220D+00 0.683D+00
 Coeff:      0.104D-05-0.921D-04-0.180D-03 0.429D-03 0.107D-02 0.696D-02
 Coeff:      0.229D-01 0.655D-01 0.220D+00 0.683D+00
 Gap=     0.160 Goal=   None    Shift=    0.000
 Gap=     0.160 Goal=   None    Shift=    0.000
 RMSDP=4.20D-07 MaxDP=3.09D-05 DE=-6.89D-07 OVMax= 7.22D-05

 Cycle  11  Pass 1  IDiag  1:
 RMSU=  2.13D-07    CP:  4.42D-01  9.79D-01  4.34D-01  6.77D-01  7.59D-01
                    CP:  5.87D-01  6.96D-01  6.61D-01  7.05D-01  7.98D-01
 E= -1899.59523993157     Delta-E=       -0.000000043575 Rises=F Damp=F
 DIIS: error= 3.47D-06 at cycle  11 NSaved=  11.
 NSaved=11 IEnMin=11 EnMin= -1899.59523993157     IErMin=11 ErrMin= 3.47D-06
 ErrMax= 3.47D-06 EMaxC= 1.00D-01 BMatC= 4.36D-08 BMatP= 2.27D-07
 IDIUse=1 WtCom= 1.00D+00 WtEn= 0.00D+00
 Coeff-Com:  0.494D-06-0.234D-04-0.332D-04-0.149D-03-0.884D-03-0.434D-03
 Coeff-Com:  0.373D-03 0.930D-02 0.800D-01 0.397D+00 0.515D+00
 Coeff:      0.494D-06-0.234D-04-0.332D-04-0.149D-03-0.884D-03-0.434D-03
 Coeff:      0.373D-03 0.930D-02 0.800D-01 0.397D+00 0.515D+00
 Gap=     0.160 Goal=   None    Shift=    0.000
 Gap=     0.160 Goal=   None    Shift=    0.000
 RMSDP=1.65D-07 MaxDP=1.09D-05 DE=-4.36D-08 OVMax= 1.93D-05

 Cycle  12  Pass 1  IDiag  1:
 RMSU=  7.12D-08    CP:  4.42D-01  9.79D-01  4.34D-01  6.77D-01  7.59D-01
                    CP:  5.87D-01  6.96D-01  6.62D-01  7.10D-01  8.81D-01
                    CP:  6.63D-01
 E= -1899.59523994091     Delta-E=       -0.000000009346 Rises=F Damp=F
 DIIS: error= 9.70D-07 at cycle  12 NSaved=  12.
 NSaved=12 IEnMin=12 EnMin= -1899.59523994091     IErMin=12 ErrMin= 9.70D-07
 ErrMax= 9.70D-07 EMaxC= 1.00D-01 BMatC= 3.49D-09 BMatP= 4.36D-08
 IDIUse=1 WtCom= 1.00D+00 WtEn= 0.00D+00
 Coeff-Com: -0.154D-06-0.102D-05 0.650D-05-0.137D-03-0.614D-03-0.114D-02
 Coeff-Com: -0.284D-02-0.424D-02 0.921D-02 0.112D+00 0.266D+00 0.622D+00
 Coeff:     -0.154D-06-0.102D-05 0.650D-05-0.137D-03-0.614D-03-0.114D-02
 Coeff:     -0.284D-02-0.424D-02 0.921D-02 0.112D+00 0.266D+00 0.622D+00
 Gap=     0.160 Goal=   None    Shift=    0.000
 Gap=     0.160 Goal=   None    Shift=    0.000
 RMSDP=5.29D-08 MaxDP=4.93D-06 DE=-9.35D-09 OVMax= 9.10D-06

 Cycle  13  Pass 1  IDiag  1:
 RMSU=  2.48D-08    CP:  4.42D-01  9.79D-01  4.34D-01  6.77D-01  7.59D-01
                    CP:  5.87D-01  6.96D-01  6.63D-01  7.14D-01  8.89D-01
                    CP:  7.32D-01  7.16D-01
 E= -1899.59523994162     Delta-E=       -0.000000000705 Rises=F Damp=F
 DIIS: error= 4.37D-07 at cycle  13 NSaved=  13.
 NSaved=13 IEnMin=13 EnMin= -1899.59523994162     IErMin=13 ErrMin= 4.37D-07
 ErrMax= 4.37D-07 EMaxC= 1.00D-01 BMatC= 6.34D-10 BMatP= 3.49D-09
 IDIUse=1 WtCom= 1.00D+00 WtEn= 0.00D+00
 Coeff-Com:  0.354D-07 0.194D-05 0.762D-05-0.661D-04-0.278D-03-0.630D-03
 Coeff-Com: -0.168D-02-0.328D-02-0.256D-02 0.272D-01 0.106D+00 0.370D+00
 Coeff-Com:  0.505D+00
 Coeff:      0.354D-07 0.194D-05 0.762D-05-0.661D-04-0.278D-03-0.630D-03
 Coeff:     -0.168D-02-0.328D-02-0.256D-02 0.272D-01 0.106D+00 0.370D+00
 Coeff:      0.505D+00
 Gap=     0.160 Goal=   None    Shift=    0.000
 Gap=     0.160 Goal=   None    Shift=    0.000
 RMSDP=2.16D-08 MaxDP=2.27D-06 DE=-7.05D-10 OVMax= 3.79D-06

 Cycle  14  Pass 1  IDiag  1:
 RMSU=  8.88D-09    CP:  4.42D-01  9.79D-01  4.34D-01  6.77D-01  7.59D-01
                    CP:  5.87D-01  6.96D-01  6.63D-01  7.14D-01  8.94D-01
                    CP:  7.39D-01  7.72D-01  5.62D-01
 E= -1899.59523994180     Delta-E=       -0.000000000179 Rises=F Damp=F
 DIIS: error= 9.31D-08 at cycle  14 NSaved=  14.
 NSaved=14 IEnMin=14 EnMin= -1899.59523994180     IErMin=14 ErrMin= 9.31D-08
 ErrMax= 9.31D-08 EMaxC= 1.00D-01 BMatC= 4.37D-11 BMatP= 6.34D-10
 IDIUse=1 WtCom= 1.00D+00 WtEn= 0.00D+00
 Coeff-Com: -0.163D-07 0.955D-06 0.287D-05-0.139D-04-0.533D-04-0.158D-03
 Coeff-Com: -0.436D-03-0.102D-02-0.259D-02-0.170D-02 0.149D-01 0.940D-01
 Coeff-Com:  0.251D+00 0.646D+00
 Coeff:     -0.163D-07 0.955D-06 0.287D-05-0.139D-04-0.533D-04-0.158D-03
 Coeff:     -0.436D-03-0.102D-02-0.259D-02-0.170D-02 0.149D-01 0.940D-01
 Coeff:      0.251D+00 0.646D+00
 Gap=     0.160 Goal=   None    Shift=    0.000
 Gap=     0.160 Goal=   None    Shift=    0.000
 RMSDP=5.87D-09 MaxDP=5.06D-07 DE=-1.79D-10 OVMax= 8.18D-07

 Error on total polarization charges =  0.01338
 SCF Done:  E(UB3LYP) =  -1899.59523994     A.U. after   14 cycles
             Convg  =    0.5865D-08             -V/T =  2.0068
 <Sx>= 0.0000 <Sy>= 0.0000 <Sz>= 0.0000 <S**2>= 0.0000 S= 0.0000
 <L.S>= 0.000000000000E+00
 KE= 1.886807783318D+03 PE=-1.273621212145D+04 EE= 4.799332523587D+03
 Annihilation of the first spin contaminant:
 S**2 before annihilation     0.0000,   after     0.0000
 Leave Link  502 at Thu Oct 13 22:55:50 2016, MaxMem= 1342177280 cpu:    8567.2
 (Enter /opt/software/g09/linda-exe/l701.exel)
 Compute integral first derivatives.
 ... and contract with generalized density number  0.
   1 Symmetry operations used in ECPInt.
 ECPInt:  NShTT=   28441 NPrTT=  163533 LenC2=   15421 LenP2D=   47411.
 LDataN:  DoStor=T MaxTD1= 5 Len=  102
 D1PCM: PCM CHGder 1st derivatives, ID1Alg=3 FixD1E=F DoIter=F DoCFld=F I1PDM=0.
 GePol: Maximum number of non-zero 1st derivatives   =     198
 Leave Link  701 at Thu Oct 13 22:56:00 2016, MaxMem= 1342177280 cpu:     194.1
 (Enter /opt/software/g09/l702.exe)
 L702 exits ... SP integral derivatives will be done elsewhere.
 Leave Link  702 at Thu Oct 13 22:56:01 2016, MaxMem= 1342177280 cpu:       0.3
 (Enter /opt/software/g09/linda-exe/l703.exel)
 Compute integral first derivatives, UseDBF=F ICtDFT=           0.
 Integral derivatives from FoFDir, PRISM(SPDF).
 Calling FoFJK, ICntrl=      2127 FMM=T ISym2X=0 I1Cent= 0 IOpClX= 1 NMat=1 NMatS=1 NMatT=0.
 FoFCou: FMM=T IPFlag=           0 FMFlag=      100000 FMFlg1=        2001
         NFxFlg=           0 DoJE=F BraDBF=F KetDBF=F FulRan=T
         Omega=  0.000000  0.000000  1.000000  0.000000  0.000000 ICntrl=    2127 IOpCl=  1
         NMat0=    1 NMatS0=    1 NMatT0=    0 NMatD0=    1 NMtDS0=    0 NMtDT0=    0
         I1Cent=           0 NGrid=           0.
 Symmetry not used in FoFCou.
 FMM levels:  10  Number of levels for PrismC:   9
 Leave Link  703 at Thu Oct 13 22:56:23 2016, MaxMem= 1342177280 cpu:     392.9
 (Enter /opt/software/g09/l716.exe)
 Dipole        = 2.04794561D+00 1.05696545D-01-1.69002615D+00
 ***** Axes restored to original set *****
 -------------------------------------------------------------------
 Center     Atomic                   Forces (Hartrees/Bohr)
 Number     Number              X              Y              Z
 -------------------------------------------------------------------
      1        8           0.001108505    0.002005986   -0.001839106
      2        6          -0.000001105    0.000374540    0.001603670
      3        6          -0.002620315   -0.000384489    0.002070330
      4        6          -0.000027641    0.000041281   -0.000329199
      5        6          -0.000281510   -0.000559500    0.000101876
      6        8          -0.000387157   -0.000065249   -0.000474778
      7        6          -0.000952390   -0.001089667    0.000071798
      8        6          -0.000327984    0.001701227   -0.002091878
      9        8          -0.000065473   -0.000821113    0.000823393
     10        8          -0.000667775    0.002877001    0.000396494
     11        7          -0.000161416   -0.000700439   -0.001210130
     12        7           0.002962543    0.000450783   -0.001846565
     13        7           0.000592822    0.000323440   -0.001064225
     14        6          -0.002068470   -0.000018115   -0.000598351
     15        6          -0.000199752    0.000660630   -0.003260811
     16        6          -0.001158764    0.000060095   -0.000838433
     17        6          -0.000325515    0.000036191   -0.000252611
     18        6          -0.000582626   -0.000168008    0.000815936
     19        6           0.001565686    0.000318920   -0.002032243
     20        6          -0.000064410   -0.000006699    0.000988678
     21        7           0.000517238    0.000004492    0.000645538
     22        6           0.000329091    0.000414866   -0.000099918
     23        6           0.000040371   -0.000258401   -0.000019716
     24        6          -0.000044966    0.000204510    0.000025616
     25        6          -0.000197869   -0.000025536    0.000099578
     26        6           0.000111579   -0.000065698   -0.000165116
     27        6           0.000134035   -0.000047778   -0.000216722
     28        6          -0.000053218    0.000024864    0.000197975
     29        8          -0.000091889   -0.000094392    0.000164873
     30        7          -0.000809571   -0.000777230    0.000690832
     31        7           0.000612149   -0.000313435    0.000468529
     32        6          -0.000196872   -0.000002371    0.000298144
     33        6           0.000036992    0.000009172   -0.000048438
     34        6          -0.000119780   -0.000023680    0.000155622
     35        6          -0.000164466    0.000047592    0.000153579
     36        6           0.000170270   -0.000060123   -0.000145854
     37        6           0.000205279    0.000059386    0.000327012
     38        6          -0.000029314    0.000349789   -0.000111588
     39        8          -0.000853878    0.000061295   -0.000003912
     40        1          -0.000233725   -0.003298061    0.000286727
     41        1           0.000262663    0.000387066    0.000657963
     42        1           0.000025068   -0.000165449    0.000168601
     43        1          -0.000032610    0.000032870   -0.000019747
     44        1           0.000137988   -0.000196756    0.000230306
     45        1           0.000246325    0.000530547    0.000123527
     46        1           0.001758889   -0.000203662    0.000724233
     47        1          -0.000136370   -0.000090636    0.000523029
     48        1           0.000102799    0.000002319    0.000027512
     49        1           0.000077941    0.000006792   -0.000033713
     50        1           0.000036429   -0.000092268    0.000250188
     51        1          -0.000022452   -0.000117424   -0.000265765
     52        1          -0.000096813    0.000001422    0.000093640
     53        1          -0.000014307    0.000012831    0.000022740
     54        1           0.000008823   -0.000009216    0.000051273
     55        1          -0.000017272   -0.000027905   -0.000011841
     56        1           0.000120760    0.000144047   -0.000229803
     57        1           0.000058649   -0.000206207   -0.000064203
     58        1           0.000084285    0.000092302   -0.000027600
     59        1           0.000009467    0.000050198   -0.000057861
     60        1          -0.000001633    0.000008861   -0.000045730
     61        1          -0.000016960   -0.000003484    0.000007852
     62        1           0.000033377   -0.000010932   -0.000069807
     63        1           0.001075001   -0.000542678   -0.000476401
     64        8           0.001424508   -0.000751847    0.003281308
     65        1          -0.001699858    0.000086140    0.000054431
     66        1           0.000876594   -0.000183009    0.001349261
 -------------------------------------------------------------------
 Cartesian Forces:  Max     0.003298061 RMS     0.000804107
 Leave Link  716 at Thu Oct 13 22:56:29 2016, MaxMem= 1342177280 cpu:       0.4
 (Enter /opt/software/g09/l103.exe)

 GradGradGradGradGradGradGradGradGradGradGradGradGradGradGradGradGradGrad
 Berny optimization.
 Using GEDIIS/GDIIS optimizer.
 Internal  Forces:  Max     0.004645205 RMS     0.000733029
 Search for a local minimum.
 Step number   3 out of a maximum of  339
 All quantities printed in internal units (Hartrees-Bohrs-Radians)
 RMS Force = .73303D-03 SwitMx=.10000D-02 MixMth= 2
 Mixed Optimization -- En-DIIS/RFO-DIIS
 Update second derivatives using D2CorX and points    1    2    3
 DE= -1.01D-03 DEPred=-1.76D-03 R= 5.72D-01
 SS=  1.41D+00  RLast= 2.67D-01 DXNew= 8.4853D-01 8.0223D-01
 Trust test= 5.72D-01 RLast= 2.67D-01 DXMaxT set to 8.02D-01
 ITU=  1  1  0
 Use linear search instead of GDIIS.
     Eigenvalues ---    0.00229   0.00230   0.00453   0.00581   0.00622
     Eigenvalues ---    0.01044   0.01061   0.01231   0.01238   0.01280
     Eigenvalues ---    0.01308   0.01393   0.01406   0.01618   0.01708
     Eigenvalues ---    0.01735   0.01744   0.01786   0.01817   0.01862
     Eigenvalues ---    0.01880   0.01904   0.01919   0.01937   0.01941
     Eigenvalues ---    0.01983   0.01992   0.02012   0.02022   0.02033
     Eigenvalues ---    0.02062   0.02086   0.02089   0.02093   0.02099
     Eigenvalues ---    0.02101   0.02108   0.02116   0.02129   0.02130
     Eigenvalues ---    0.02134   0.02146   0.02159   0.02160   0.02163
     Eigenvalues ---    0.02166   0.02166   0.02184   0.02186   0.02188
     Eigenvalues ---    0.02189   0.02225   0.02260   0.02467   0.03137
     Eigenvalues ---    0.03156   0.03216   0.03851   0.04068   0.05113
     Eigenvalues ---    0.05355   0.05788   0.06004   0.07159   0.07255
     Eigenvalues ---    0.08678   0.09405   0.09535   0.12781   0.12980
     Eigenvalues ---    0.14316   0.15785   0.15987   0.16000   0.16000
     Eigenvalues ---    0.16000   0.16000   0.16000   0.16000   0.16000
     Eigenvalues ---    0.16000   0.16000   0.16000   0.16000   0.16000
     Eigenvalues ---    0.16000   0.16000   0.16000   0.16018   0.16145
     Eigenvalues ---    0.16393   0.16462   0.16873   0.17778   0.19491
     Eigenvalues ---    0.22000   0.22000   0.22000   0.22006   0.22007
     Eigenvalues ---    0.22016   0.22086   0.22342   0.22453   0.22484
     Eigenvalues ---    0.22657   0.22822   0.24160   0.24469   0.24473
     Eigenvalues ---    0.24687   0.24812   0.24998   0.24998   0.25000
     Eigenvalues ---    0.25000   0.25000   0.25000   0.25000   0.25000
     Eigenvalues ---    0.25000   0.25000   0.25428   0.27119   0.27360
     Eigenvalues ---    0.27417   0.30012   0.30476   0.33387   0.33791
     Eigenvalues ---    0.33948   0.33965   0.34123   0.34815   0.34970
     Eigenvalues ---    0.34974   0.35020   0.35077   0.35151   0.35178
     Eigenvalues ---    0.35221   0.35267   0.35288   0.35377   0.35379
     Eigenvalues ---    0.35391   0.35408   0.36300   0.37075   0.37272
     Eigenvalues ---    0.37376   0.38327   0.38938   0.40703   0.41043
     Eigenvalues ---    0.41216   0.41546   0.41588   0.42013   0.43731
     Eigenvalues ---    0.44192   0.44370   0.44440   0.44500   0.44950
     Eigenvalues ---    0.45499   0.45537   0.45802   0.46299   0.46359
     Eigenvalues ---    0.46476   0.46884   0.46956   0.47241   0.48033
     Eigenvalues ---    0.48964   0.49066   0.52101   0.52557   0.52792
     Eigenvalues ---    0.53045   0.53285   0.53585   0.54031   0.55543
     Eigenvalues ---    0.56255   0.70150   0.71609   0.72260   0.86787
     Eigenvalues ---    0.91571   0.95330
 RFO step:  Lambda=-1.39577661D-03 EMin= 2.29169736D-03
 Quartic linear search produced a step of -0.28379.
 Iteration  1 RMS(Cart)=  0.10992365 RMS(Int)=  0.00441056
 Iteration  2 RMS(Cart)=  0.01525508 RMS(Int)=  0.00055108
 Iteration  3 RMS(Cart)=  0.00011567 RMS(Int)=  0.00055036
 Iteration  4 RMS(Cart)=  0.00000027 RMS(Int)=  0.00055036
 Variable       Old X    -DE/DX   Delta X   Delta X   Delta X     New X
                                 (Linear)    (Quad)   (Total)
    R1        2.69075   0.00101   0.00095   0.00012   0.00059   2.69134
    R2        1.86642  -0.00045  -0.00016  -0.00299  -0.00128   1.86514
    R3        2.92912   0.00006   0.00108  -0.00269  -0.00161   2.92751
    R4        2.93464   0.00057   0.00158   0.00220   0.00185   2.93649
    R5        2.93670   0.00118   0.00090   0.00077   0.00168   2.93837
    R6        2.31962  -0.00054   0.00001  -0.00050  -0.00049   2.31913
    R7        2.56508   0.00353  -0.00074   0.00642   0.00568   2.57076
    R8        2.86264  -0.00003   0.00058   0.00229   0.00133   2.86397
    R9        2.07353   0.00030  -0.00003   0.00066   0.00064   2.07416
   R10        2.05552   0.00018   0.00000   0.00033   0.00033   2.05585
   R11        2.87465   0.00038   0.00068  -0.00093  -0.00025   2.87439
   R12        2.05967  -0.00002   0.00002  -0.00010  -0.00008   2.05959
   R13        2.06959   0.00013   0.00004   0.00012   0.00016   2.06975
   R14        2.35015  -0.00029  -0.00065   0.00122   0.00092   2.35106
   R15        2.56562  -0.00106   0.00082  -0.00363  -0.00281   2.56281
   R16        2.31604   0.00053  -0.00117   0.00361   0.00245   2.31849
   R17        2.60255  -0.00075   0.00123  -0.00459  -0.00336   2.59920
   R18        3.30087   0.00169  -0.00261   0.00237   0.00191   3.30278
   R19        2.58381   0.00040  -0.00138   0.00428   0.00290   2.58671
   R20        1.92966  -0.00017   0.00004  -0.00036  -0.00033   1.92934
   R21        2.58877  -0.00166  -0.00370   0.00680   0.00311   2.59188
   R22        1.93054  -0.00137  -0.00062  -0.00011  -0.00073   1.92981
   R23        2.43604  -0.00151  -0.00344   0.00714   0.00370   2.43974
   R24        2.75977   0.00006   0.00176  -0.00454  -0.00278   2.75700
   R25        2.07573  -0.00043  -0.00052   0.00089   0.00037   2.07610
   R26        2.66657  -0.00071  -0.00083   0.00115   0.00032   2.66689
   R27        2.67296   0.00314  -0.00022   0.00578   0.00557   2.67853
   R28        2.62737  -0.00035   0.00044  -0.00178  -0.00134   2.62603
   R29        2.05824  -0.00162  -0.00169   0.00204   0.00035   2.05859
   R30        2.64145   0.00007  -0.00031   0.00081   0.00050   2.64195
   R31        2.05020   0.00002  -0.00001   0.00006   0.00004   2.05025
   R32        2.63444  -0.00073  -0.00033  -0.00025  -0.00058   2.63385
   R33        2.05160   0.00008   0.00001   0.00011   0.00012   2.05172
   R34        2.64416   0.00133  -0.00150   0.00596   0.00446   2.64862
   R35        2.05410   0.00024  -0.00002   0.00045   0.00044   2.05453
   R36        2.56124   0.00318   0.00902  -0.02060  -0.01157   2.54967
   R37        2.43374  -0.00029  -0.00052   0.00117   0.00065   2.43439
   R38        2.75765  -0.00002   0.00060  -0.00156  -0.00096   2.75669
   R39        2.07276   0.00012   0.00030  -0.00061  -0.00031   2.07245
   R40        2.68060  -0.00007   0.00087  -0.00227  -0.00140   2.67920
   R41        2.66424   0.00000  -0.00044   0.00123   0.00079   2.66503
   R42        2.64656   0.00010  -0.00016   0.00061   0.00046   2.64701
   R43        2.56564   0.00003  -0.00015   0.00045   0.00030   2.56594
   R44        2.63292  -0.00023  -0.00003  -0.00025  -0.00029   2.63263
   R45        2.05467  -0.00002   0.00012  -0.00040  -0.00028   2.05440
   R46        2.64182  -0.00013  -0.00021   0.00038   0.00017   2.64199
   R47        2.05178   0.00002   0.00001   0.00003   0.00003   2.05182
   R48        2.62688  -0.00024   0.00005  -0.00051  -0.00046   2.62643
   R49        2.05006   0.00001   0.00002  -0.00003  -0.00001   2.05004
   R50        2.05351   0.00002   0.00011  -0.00026  -0.00015   2.05336
   R51        1.83024  -0.00011  -0.00009   0.00017   0.00008   1.83031
   R52        2.57286  -0.00092  -0.00051   0.00017  -0.00034   2.57252
   R53        1.92428   0.00006  -0.00007   0.00023   0.00017   1.92445
   R54        2.44029  -0.00010  -0.00029   0.00072   0.00043   2.44072
   R55        3.30564  -0.00060   0.00413  -0.01716  -0.01301   3.29263
   R56        2.74730   0.00025   0.00024  -0.00013   0.00009   2.74739
   R57        2.06879   0.00008   0.00034  -0.00082  -0.00048   2.06831
   R58        2.66182  -0.00006  -0.00011   0.00020   0.00009   2.66191
   R59        2.68801   0.00003   0.00030  -0.00082  -0.00055   2.68747
   R60        2.62499   0.00001  -0.00008   0.00030   0.00022   2.62521
   R61        2.05408   0.00004   0.00009  -0.00019  -0.00010   2.05398
   R62        2.64972  -0.00022   0.00007  -0.00049  -0.00041   2.64931
   R63        2.05023   0.00004   0.00000   0.00007   0.00007   2.05030
   R64        2.62994   0.00000  -0.00034   0.00096   0.00062   2.63057
   R65        2.05253   0.00001   0.00007  -0.00016  -0.00009   2.05244
   R66        2.64997  -0.00032   0.00043  -0.00166  -0.00123   2.64874
   R67        2.05128  -0.00007   0.00000  -0.00012  -0.00012   2.05116
   R68        2.55157  -0.00037  -0.00146   0.00350   0.00204   2.55361
   R69        1.87070   0.00035  -0.00031   0.00136   0.00107   1.87177
   R70        1.83256  -0.00119  -0.00117   0.00186   0.00070   1.83326
    A1        1.84925  -0.00149   0.00015   0.00223   0.00044   1.84969
    A2        1.91306   0.00066   0.00293  -0.01316  -0.00929   1.90377
    A3        1.94087  -0.00012   0.00092   0.01324   0.01197   1.95284
    A4        1.91840  -0.00054  -0.00046   0.00121   0.00123   1.91963
    A5        1.85167  -0.00085  -0.00229  -0.00409  -0.00564   1.84603
    A6        1.85677  -0.00047  -0.00288   0.00094  -0.00265   1.85412
    A7        1.97925   0.00130   0.00166   0.00031   0.00272   1.98197
    A8        2.11532  -0.00028  -0.00127   0.00278   0.00150   2.11682
    A9        1.97732  -0.00008   0.00051  -0.00150  -0.00099   1.97633
   A10        2.19047   0.00035   0.00076  -0.00125  -0.00049   2.18998
   A11        1.97164   0.00189   0.00249   0.01983   0.01661   1.98825
   A12        1.87989   0.00033  -0.00024   0.00132   0.00214   1.88203
   A13        1.93224  -0.00129  -0.00101  -0.00861  -0.00762   1.92461
   A14        1.84627  -0.00165  -0.00128  -0.00379  -0.00399   1.84228
   A15        1.95058   0.00057   0.00008  -0.00361  -0.00122   1.94936
   A16        1.87731   0.00005  -0.00020  -0.00594  -0.00687   1.87044
   A17        2.00111   0.00274   0.00202   0.00465   0.00666   2.00777
   A18        1.91142  -0.00093  -0.00112  -0.00091  -0.00202   1.90940
   A19        1.86897  -0.00052  -0.00002   0.00015   0.00013   1.86910
   A20        1.88539  -0.00082  -0.00056  -0.00146  -0.00202   1.88337
   A21        1.90433  -0.00081  -0.00015  -0.00083  -0.00098   1.90334
   A22        1.89004   0.00025  -0.00027  -0.00193  -0.00220   1.88784
   A23        2.11577  -0.00019   0.00064   0.00678   0.00376   2.11953
   A24        2.07536   0.00017  -0.00043  -0.00375  -0.00306   2.07230
   A25        2.09170  -0.00001  -0.00043  -0.00433  -0.00361   2.08808
   A26        2.15837  -0.00092   0.00021  -0.00330  -0.00337   2.15499
   A27        1.97666   0.00093  -0.00008   0.00276   0.00239   1.97905
   A28        2.14815  -0.00001  -0.00025   0.00037  -0.00017   2.14798
   A29        2.14225   0.00009  -0.00050   0.00180   0.00116   2.14341
   A30        2.02802   0.00013  -0.00105   0.00358   0.00238   2.03039
   A31        2.11078  -0.00019   0.00053  -0.00218  -0.00180   2.10898
   A32        2.10349   0.00312   0.01403  -0.03005  -0.01601   2.08748
   A33        2.03937  -0.00027  -0.00302   0.00896   0.00594   2.04531
   A34        2.14031  -0.00284  -0.01104   0.02112   0.01009   2.15039
   A35        2.01767  -0.00465  -0.01345   0.01967   0.00622   2.02390
   A36        2.18857   0.00032  -0.00339   0.01069   0.00730   2.19587
   A37        2.10174  -0.00051   0.00075  -0.00445  -0.00370   2.09804
   A38        1.99287   0.00019   0.00265  -0.00624  -0.00360   1.98928
   A39        2.03859  -0.00080  -0.00293   0.00514   0.00220   2.04079
   A40        2.19180   0.00034   0.00492  -0.01192  -0.00700   2.18480
   A41        2.05279   0.00046  -0.00199   0.00679   0.00479   2.05759
   A42        2.13320   0.00017   0.00067  -0.00151  -0.00084   2.13237
   A43        2.06311  -0.00014   0.00035  -0.00152  -0.00117   2.06194
   A44        2.08687  -0.00003  -0.00103   0.00303   0.00201   2.08888
   A45        2.07935   0.00006   0.00035  -0.00134  -0.00099   2.07836
   A46        2.09778   0.00008  -0.00022   0.00123   0.00101   2.09879
   A47        2.10605  -0.00014  -0.00013   0.00011  -0.00002   2.10603
   A48        2.09576   0.00049  -0.00076   0.00303   0.00227   2.09803
   A49        2.10261  -0.00027   0.00068  -0.00239  -0.00172   2.10089
   A50        2.08482  -0.00022   0.00008  -0.00063  -0.00055   2.08426
   A51        2.10677   0.00045  -0.00038   0.00237   0.00199   2.10875
   A52        2.09717  -0.00010   0.00025  -0.00079  -0.00055   2.09662
   A53        2.07925  -0.00035   0.00014  -0.00158  -0.00144   2.07781
   A54        2.09850  -0.00163   0.00211  -0.00933  -0.00722   2.09128
   A55        2.07183   0.00129   0.00331  -0.00558  -0.00227   2.06956
   A56        2.11285   0.00034  -0.00542   0.01492   0.00950   2.12235
   A57        2.02310  -0.00174   0.00034  -0.00607  -0.00573   2.01737
   A58        2.18103   0.00064   0.00070   0.00044   0.00114   2.18217
   A59        2.10079  -0.00059  -0.00057  -0.00078  -0.00136   2.09943
   A60        2.00135  -0.00005  -0.00012   0.00036   0.00023   2.00158
   A61        2.18750   0.00025   0.00053  -0.00042   0.00010   2.18760
   A62        2.03831  -0.00023  -0.00026  -0.00024  -0.00050   2.03781
   A63        2.05738  -0.00002  -0.00028   0.00068   0.00040   2.05778
   A64        2.09156  -0.00004  -0.00014   0.00033   0.00019   2.09175
   A65        2.07639  -0.00021   0.00110  -0.00337  -0.00227   2.07411
   A66        2.11524   0.00025  -0.00095   0.00303   0.00208   2.11732
   A67        2.10866  -0.00003   0.00022  -0.00067  -0.00045   2.10821
   A68        2.07669   0.00014   0.00000   0.00061   0.00061   2.07730
   A69        2.09783  -0.00012  -0.00022   0.00007  -0.00016   2.09767
   A70        2.09823   0.00004  -0.00012   0.00043   0.00032   2.09855
   A71        2.08354   0.00000   0.00007  -0.00019  -0.00011   2.08342
   A72        2.10142  -0.00004   0.00005  -0.00025  -0.00020   2.10122
   A73        2.07822   0.00004   0.00003  -0.00001   0.00002   2.07824
   A74        2.10593  -0.00007  -0.00001  -0.00020  -0.00021   2.10572
   A75        2.09903   0.00003  -0.00002   0.00021   0.00019   2.09923
   A76        2.13232   0.00001   0.00029  -0.00076  -0.00048   2.13184
   A77        2.06298  -0.00001  -0.00016   0.00038   0.00022   2.06320
   A78        2.08789   0.00001  -0.00013   0.00039   0.00026   2.08814
   A79        1.90297   0.00035  -0.00010   0.00179   0.00168   1.90465
   A80        2.09406  -0.00048  -0.00154   0.00250   0.00097   2.09503
   A81        2.06712   0.00020   0.00038  -0.00081  -0.00042   2.06670
   A82        2.09093   0.00025  -0.00012   0.00094   0.00083   2.09176
   A83        2.07335   0.00056  -0.00012   0.00172   0.00160   2.07495
   A84        2.10512   0.00016   0.00130  -0.00311  -0.00185   2.10326
   A85        2.12265  -0.00012  -0.00087   0.00193   0.00107   2.12372
   A86        2.05540  -0.00003  -0.00044   0.00121   0.00079   2.05619
   A87        2.08451   0.00007   0.00009   0.00006   0.00019   2.08470
   A88        2.12482   0.00013   0.00006   0.00006   0.00007   2.12489
   A89        2.07385  -0.00019  -0.00016  -0.00012  -0.00026   2.07359
   A90        2.11835   0.00005   0.00033  -0.00074  -0.00043   2.11792
   A91        2.06787   0.00001  -0.00019   0.00059   0.00040   2.06827
   A92        2.09696  -0.00006  -0.00013   0.00016   0.00003   2.09699
   A93        2.08057   0.00002  -0.00013   0.00045   0.00032   2.08090
   A94        2.10005  -0.00001   0.00010  -0.00035  -0.00024   2.09980
   A95        2.10257  -0.00001   0.00002  -0.00010  -0.00008   2.10249
   A96        2.10699  -0.00002  -0.00002  -0.00005  -0.00007   2.10692
   A97        2.09351   0.00002  -0.00005   0.00026   0.00020   2.09371
   A98        2.08269   0.00000   0.00007  -0.00021  -0.00013   2.08256
   A99        2.10178  -0.00002   0.00023  -0.00078  -0.00056   2.10122
   A100       2.11680  -0.00003   0.00042  -0.00127  -0.00084   2.11596
   A101       2.06460   0.00005  -0.00065   0.00205   0.00141   2.06601
   A102       2.08483   0.00017  -0.00025   0.00124   0.00099   2.08582
   A103       2.13587  -0.00009   0.00040  -0.00162  -0.00126   2.13461
   A104       2.06249  -0.00008  -0.00015   0.00039   0.00027   2.06276
   A105       1.88956  -0.00092  -0.00092  -0.00208  -0.00302   1.88654
   A106       1.89233   0.00222  -0.01001   0.03489   0.02488   1.91721
    D1       -2.46986  -0.00175  -0.00579  -0.06351  -0.06925  -2.53912
    D2       -0.42798  -0.00247  -0.00623  -0.06874  -0.07484  -0.50283
    D3        1.77845  -0.00127  -0.00373  -0.05768  -0.06138   1.71707
    D4       -3.03230   0.00010  -0.00332   0.01735   0.01323  -3.01907
    D5        0.12172   0.00007  -0.00290   0.01477   0.01107   0.13279
    D6        1.15372   0.00038  -0.00466   0.01106   0.00723   1.16095
    D7       -1.97545   0.00035  -0.00425   0.00849   0.00507  -1.97038
    D8       -0.95892  -0.00045  -0.00397   0.01233   0.00832  -0.95060
    D9        2.19510  -0.00047  -0.00356   0.00976   0.00617   2.20126
   D10        0.89147  -0.00169  -0.01321  -0.05813  -0.07233   0.81914
   D11       -1.14100  -0.00095  -0.01290  -0.06557  -0.07836  -1.21935
   D12        3.09413  -0.00049  -0.01197  -0.05442  -0.06716   3.02697
   D13        2.97045  -0.00147  -0.01057  -0.06920  -0.08044   2.89001
   D14        0.93799  -0.00073  -0.01027  -0.07664  -0.08647   0.85152
   D15       -1.11007  -0.00027  -0.00933  -0.06549  -0.07527  -1.18534
   D16       -1.28102  -0.00188  -0.01461  -0.07046  -0.08574  -1.36676
   D17        2.96971  -0.00113  -0.01431  -0.07790  -0.09177   2.87794
   D18        0.92165  -0.00067  -0.01337  -0.06675  -0.08057   0.84108
   D19       -1.05314  -0.00004  -0.00604   0.02156   0.01646  -1.03668
   D20        3.10781  -0.00019  -0.00587   0.02090   0.01597   3.12378
   D21        1.06207   0.00030  -0.00495   0.02358   0.01957   1.08164
   D22       -3.12302  -0.00028  -0.00763   0.03602   0.02835  -3.09467
   D23        1.03794  -0.00042  -0.00746   0.03536   0.02786   1.06579
   D24       -1.00780   0.00006  -0.00654   0.03804   0.03146  -0.97635
   D25        1.13145   0.00035  -0.00394   0.04024   0.03541   1.16686
   D26       -0.99078   0.00021  -0.00377   0.03958   0.03492  -0.95586
   D27       -3.03652   0.00069  -0.00285   0.04226   0.03852  -2.99800
   D28        3.13811  -0.00005   0.00142  -0.00513  -0.00371   3.13439
   D29       -0.00984  -0.00010  -0.00113   0.00050  -0.00062  -0.01046
   D30        0.00957  -0.00008   0.00188  -0.00787  -0.00600   0.00357
   D31       -3.13838  -0.00012  -0.00067  -0.00224  -0.00290  -3.14128
   D32       -0.67558  -0.00117  -0.01937  -0.03974  -0.05846  -0.73404
   D33        2.49492   0.00006  -0.01304   0.01230  -0.00024   2.49468
   D34        1.37672  -0.00079  -0.01912  -0.02980  -0.04932   1.32740
   D35       -1.73596   0.00044  -0.01279   0.02224   0.00890  -1.72706
   D36       -2.86841  -0.00140  -0.02007  -0.04101  -0.06047  -2.92888
   D37        0.30209  -0.00017  -0.01374   0.01104  -0.00225   0.29984
   D38       -1.85191  -0.00021  -0.00049  -0.01469  -0.01515  -1.86707
   D39        1.29430   0.00075   0.00665   0.02399   0.03061   1.32491
   D40        0.28448  -0.00017  -0.00099  -0.01381  -0.01477   0.26971
   D41       -2.85249   0.00079   0.00615   0.02487   0.03099  -2.82150
   D42        2.33557  -0.00077  -0.00170  -0.01738  -0.01905   2.31652
   D43       -0.80140   0.00019   0.00543   0.02130   0.02671  -0.77469
   D44       -0.06859  -0.00033  -0.00414  -0.01375  -0.01772  -0.08632
   D45       -3.14052  -0.00085   0.00845  -0.06570  -0.05711   3.08556
   D46        3.10151   0.00089   0.00207   0.03737   0.03930   3.14080
   D47        0.02958   0.00037   0.01466  -0.01458  -0.00008   0.02949
   D48       -3.08636  -0.00054   0.00323  -0.04068  -0.03747  -3.12383
   D49       -0.21043  -0.00065  -0.00194  -0.02954  -0.03151  -0.24194
   D50        0.05983   0.00041   0.01031  -0.00225   0.00809   0.06792
   D51        2.93575   0.00030   0.00514   0.00889   0.01406   2.94981
   D52       -3.10550  -0.00010   0.01244  -0.03734  -0.02489  -3.13039
   D53       -0.03679   0.00045  -0.00084   0.01724   0.01639  -0.02041
   D54        3.14045   0.00003  -0.00009   0.00133   0.00124  -3.14150
   D55        0.00559   0.00006   0.00252  -0.00457  -0.00203   0.00356
   D56       -3.13877   0.00014   0.00008   0.00324   0.00332  -3.13545
   D57        0.00221   0.00009  -0.00026   0.00245   0.00219   0.00441
   D58       -3.13774  -0.00002  -0.00067   0.00136   0.00069  -3.13704
   D59        0.00397   0.00002  -0.00094   0.00387   0.00293   0.00690
   D60        0.00443   0.00002  -0.00035   0.00211   0.00176   0.00619
   D61       -3.13705   0.00007  -0.00062   0.00462   0.00399  -3.13306
   D62        3.14142   0.00004  -0.00029   0.00250   0.00221  -3.13956
   D63       -0.00073   0.00004  -0.00017   0.00210   0.00193   0.00121
   D64       -0.00028   0.00000  -0.00004   0.00019   0.00015  -0.00014
   D65        3.14076   0.00000   0.00007  -0.00020  -0.00013   3.14062
   D66       -3.14081  -0.00008   0.00029  -0.00365  -0.00335   3.13902
   D67       -0.00090  -0.00003   0.00048  -0.00230  -0.00182  -0.00273
   D68        0.00090  -0.00003   0.00002  -0.00112  -0.00110  -0.00020
   D69        3.14081   0.00002   0.00021   0.00023   0.00043   3.14124
   D70       -0.00022   0.00002   0.00001   0.00067   0.00068   0.00046
   D71        3.14138   0.00000   0.00011  -0.00027  -0.00016   3.14122
   D72       -3.14125   0.00002  -0.00011   0.00107   0.00097  -3.14028
   D73        0.00034   0.00000   0.00000   0.00013   0.00012   0.00047
   D74        0.00011  -0.00001   0.00005  -0.00062  -0.00057  -0.00046
   D75       -3.14123  -0.00002   0.00002  -0.00083  -0.00081   3.14115
   D76       -3.14149   0.00000  -0.00005   0.00033   0.00028  -3.14120
   D77        0.00036   0.00000  -0.00009   0.00013   0.00004   0.00040
   D78        0.00051  -0.00001  -0.00008  -0.00030  -0.00039   0.00013
   D79       -3.14115  -0.00003  -0.00008  -0.00062  -0.00070   3.14133
   D80       -3.14133  -0.00001  -0.00004  -0.00010  -0.00014  -3.14147
   D81        0.00019  -0.00002  -0.00004  -0.00041  -0.00046  -0.00027
   D82       -0.00103   0.00004   0.00004   0.00120   0.00124   0.00020
   D83       -3.14090  -0.00002  -0.00016  -0.00017  -0.00033  -3.14123
   D84        3.14063   0.00005   0.00004   0.00151   0.00155  -3.14100
   D85        0.00077  -0.00001  -0.00016   0.00014  -0.00002   0.00075
   D86        3.13209   0.00011  -0.00546   0.02142   0.01596  -3.13514
   D87       -0.01120   0.00016  -0.00527   0.02276   0.01750   0.00630
   D88       -3.13906   0.00000  -0.00236   0.00465   0.00229  -3.13678
   D89       -0.00264   0.00026  -0.00083   0.00918   0.00835   0.00571
   D90       -0.01954   0.00033  -0.00083   0.01629   0.01546  -0.00408
   D91        3.12550   0.00031   0.00028   0.01230   0.01258   3.13808
   D92        3.12696   0.00008  -0.00228   0.01199   0.00970   3.13666
   D93       -0.01119   0.00005  -0.00117   0.00800   0.00682  -0.00436
   D94       -3.13948   0.00003   0.00146  -0.00315  -0.00169  -3.14117
   D95        0.00348   0.00006   0.00135  -0.00192  -0.00058   0.00291
   D96       -0.00136   0.00005   0.00034   0.00088   0.00122  -0.00015
   D97       -3.14159   0.00008   0.00022   0.00210   0.00233  -3.13926
   D98        3.13929  -0.00001  -0.00111   0.00266   0.00155   3.14085
   D99       -0.00232   0.00002  -0.00056   0.00211   0.00155  -0.00078
   D100       0.00088  -0.00004  -0.00009  -0.00102  -0.00110  -0.00022
   D101      -3.14073  -0.00001   0.00046  -0.00157  -0.00111   3.14134
   D102       0.00125  -0.00004  -0.00035  -0.00022  -0.00057   0.00067
   D103      -3.14071  -0.00003  -0.00040   0.00024  -0.00016  -3.14087
   D104       3.14144  -0.00006  -0.00023  -0.00148  -0.00172   3.13973
   D105      -0.00052  -0.00006  -0.00029  -0.00102  -0.00131  -0.00182
   D106      -3.12055  -0.00019   0.00239  -0.01235  -0.00996  -3.13051
   D107       0.02243  -0.00016   0.00228  -0.01111  -0.00883   0.01360
   D108      -0.00059   0.00000   0.00010  -0.00035  -0.00025  -0.00084
   D109       3.14122   0.00001  -0.00002   0.00037   0.00035   3.14156
   D110       3.14137  -0.00001   0.00016  -0.00082  -0.00066   3.14071
   D111      -0.00001   0.00000   0.00003  -0.00010  -0.00007  -0.00008
   D112       0.00008   0.00002   0.00014   0.00024   0.00038   0.00047
   D113      -3.14125   0.00000  -0.00024   0.00070   0.00046  -3.14079
   D114       3.14146   0.00001   0.00027  -0.00049  -0.00022   3.14124
   D115       0.00012  -0.00001  -0.00011  -0.00003  -0.00014  -0.00002
   D116      -0.00025   0.00000  -0.00015   0.00046   0.00031   0.00006
   D117       3.14137  -0.00003  -0.00070   0.00102   0.00032  -3.14150
   D118       3.14109   0.00002   0.00023   0.00001   0.00023   3.14133
   D119      -0.00048  -0.00001  -0.00032   0.00057   0.00024  -0.00023
   D120       3.06659  -0.00076   0.01040  -0.05650  -0.04610   3.02049
   D121       0.19430  -0.00064   0.01557  -0.06752  -0.05195   0.14234
   D122       3.12732   0.00036   0.00321   0.00216   0.00538   3.13270
   D123      -0.00891  -0.00020  -0.00170  -0.00315  -0.00485  -0.01375
   D124      -3.12921  -0.00063  -0.00365  -0.01552  -0.01917   3.13480
   D125       0.00924  -0.00050  -0.00131  -0.01686  -0.01817  -0.00892
   D126       0.00721  -0.00009   0.00108  -0.01040  -0.00933  -0.00212
   D127      -3.13752   0.00004   0.00342  -0.01174  -0.00832   3.13734
   D128       3.13779   0.00019   0.00259  -0.00024   0.00235   3.14014
   D129      -0.00178   0.00009   0.00176  -0.00122   0.00055  -0.00124
   D130      -0.00076   0.00006   0.00032   0.00105   0.00137   0.00061
   D131      -3.14033  -0.00004  -0.00051   0.00008  -0.00043  -3.14076
   D132      -3.13837  -0.00021  -0.00295   0.00046  -0.00249  -3.14086
   D133       0.00648  -0.00041  -0.00436  -0.00260  -0.00696  -0.00048
   D134       0.00011  -0.00007  -0.00062  -0.00087  -0.00149  -0.00139
   D135      -3.13823  -0.00027  -0.00203  -0.00393  -0.00596   3.13900
   D136       0.00077  -0.00001   0.00010  -0.00059  -0.00049   0.00028
   D137      -3.14043  -0.00004  -0.00025  -0.00063  -0.00088  -3.14131
   D138       3.14031   0.00009   0.00095   0.00040   0.00135  -3.14153
   D139      -0.00089   0.00006   0.00059   0.00036   0.00096   0.00007
   D140      -0.00012  -0.00002  -0.00022  -0.00007  -0.00029  -0.00041
   D141       3.14144   0.00001   0.00010  -0.00010   0.00000   3.14143
   D142       3.14108   0.00001   0.00013  -0.00003   0.00010   3.14118
   D143      -0.00055   0.00003   0.00045  -0.00006   0.00039  -0.00016
   D144      -0.00052   0.00000  -0.00009   0.00023   0.00014  -0.00038
   D145       3.14072   0.00008   0.00078   0.00050   0.00128  -3.14118
   D146       3.14110  -0.00002  -0.00040   0.00026  -0.00014   3.14096
   D147      -0.00084   0.00005   0.00046   0.00054   0.00100   0.00016
   D148       0.00052   0.00004   0.00051   0.00025   0.00076   0.00128
   D149       3.13899   0.00024   0.00186   0.00318   0.00504  -3.13915
   D150      -3.14073  -0.00003  -0.00033  -0.00002  -0.00035  -3.14108
   D151      -0.00226   0.00016   0.00102   0.00291   0.00393   0.00168
   D152       0.00423  -0.00037  -0.00379   0.00078  -0.00301   0.00121
   D153      -3.13415  -0.00057  -0.00519  -0.00224  -0.00743  -3.14157
         Item               Value     Threshold  Converged?
 Maximum Force            0.004645     0.000450     NO 
 RMS     Force            0.000733     0.000300     NO 
 Maximum Displacement     0.620457     0.001800     NO 
 RMS     Displacement     0.115605     0.001200     NO 
 Predicted change in Energy=-1.039266D-03
 GradGradGradGradGradGradGradGradGradGradGradGradGradGradGradGradGradGrad

 Leave Link  103 at Thu Oct 13 22:56:37 2016, MaxMem= 1342177280 cpu:     128.5
 (Enter /opt/software/g09/l202.exe)
 Stoichiometry    C27H26N6O7
 Framework group  C1[X(C27H26N6O7)]
 Deg. of freedom   192
 Full point group                 C1      NOp   1
 Largest Abelian subgroup         C1      NOp   1
 Largest concise Abelian subgroup C1      NOp   1
                         Standard orientation:                         
 ---------------------------------------------------------------------
 Center     Atomic      Atomic             Coordinates (Angstroms)
 Number     Number       Type             X           Y           Z
 ---------------------------------------------------------------------
      1          8           0       -0.836857   -1.407566    0.622496
      2          6           0       -0.826808   -0.201727   -0.135258
      3          6           0       -2.281593    0.167123   -0.519288
      4          6           0       -0.291476    0.998819    0.693466
      5          6           0       -0.066332   -0.421375   -1.473617
      6          8           0       -2.522928    1.097687   -1.282111
      7          6           0        0.984844    0.699954    1.454104
      8          6           0        1.382740   -0.859648   -1.326180
      9          8           0        2.338435   -0.123905   -1.551112
     10          8           0        1.145287   -0.377903    2.054390
     11          7           0        1.923587    1.672946    1.560283
     12          7           0       -3.211825   -0.625300    0.078534
     13          7           0       -4.544099   -0.407320   -0.163774
     14          6           0       -5.365360   -1.199914    0.439668
     15          6           0       -6.819876   -1.165845    0.331366
     16          6           0       -7.539141   -2.121043    1.080963
     17          6           0       -8.926940   -2.188231    1.056890
     18          6           0       -9.637517   -1.281592    0.264644
     19          6           0       -8.958007   -0.325401   -0.488069
     20          6           0       -7.558357   -0.255269   -0.465229
     21          7           0        1.813603    2.881853    0.927718
     22          6           0        2.792119    3.698621    1.114596
     23          6           0        2.884570    5.038691    0.545660
     24          6           0        1.917319    5.639529   -0.299024
     25          6           0        2.124065    6.937865   -0.782398
     26          6           0        3.272398    7.650379   -0.444079
     27          6           0        4.238051    7.075713    0.387729
     28          6           0        4.034907    5.787749    0.868926
     29          8           0        0.801060    4.936326   -0.620266
     30          7           0        1.520154   -2.182642   -0.975999
     31          7           0        2.759919   -2.712424   -0.787593
     32          6           0        2.861173   -3.915521   -0.328826
     33          6           0        4.167522   -4.520021   -0.124546
     34          6           0        4.252053   -5.830654    0.384688
     35          6           0        5.479353   -6.447046    0.593665
     36          6           0        6.656574   -5.748391    0.291170
     37          6           0        6.604384   -4.452094   -0.213463
     38          6           0        5.369917   -3.823814   -0.427925
     39          8           0        5.371138   -2.566054   -0.921972
     40          1           0       -0.107375   -1.320378    1.281587
     41          1           0       -1.040592    1.239712    1.458661
     42          1           0       -0.185737    1.876886    0.059929
     43          1           0       -0.080056    0.501363   -2.053459
     44          1           0       -0.615620   -1.185220   -2.034356
     45          1           0        2.745840    1.449504    2.122721
     46          1           0       -2.868853   -1.365631    0.692659
     47          1           0       -4.985474   -1.988243    1.103897
     48          1           0       -9.448279   -2.935806    1.645484
     49          1           0      -10.722153   -1.315529    0.229892
     50          1           0       -9.511891    0.378861   -1.103905
     51          1           0        3.643582    3.407498    1.741488
     52          1           0        1.373316    7.385826   -1.428602
     53          1           0        3.409160    8.655298   -0.831813
     54          1           0        5.134374    7.624796    0.656026
     55          1           0        4.779402    5.332221    1.516153
     56          1           0        0.246426    5.471756   -1.206613
     57          1           0        0.698863   -2.683100   -0.641177
     58          1           0        1.977966   -4.511055   -0.077392
     59          1           0        3.329992   -6.358450    0.614108
     60          1           0        5.524827   -7.457403    0.986449
     61          1           0        7.622537   -6.218804    0.450067
     62          1           0        7.510451   -3.903616   -0.450886
     63          1           0        4.430162   -2.270590   -1.013375
     64          8           0       -6.884655    0.664104   -1.187237
     65          1           0       -7.509981    1.221132   -1.676946
     66          1           0       -6.975586   -2.823471    1.693905
 ---------------------------------------------------------------------
 Rotational constants (GHZ):      0.0691776      0.0427773      0.0277724
 Leave Link  202 at Thu Oct 13 22:56:37 2016, MaxMem= 1342177280 cpu:       0.5
 (Enter /opt/software/g09/l301.exe)
 Basis read from rwf:  (5D, 7F)
 Pseudo-potential data read from rwf file.
 There are   690 symmetry adapted basis functions of A   symmetry.
 Integral buffers will be    131072 words long.
 Raffenetti 2 integral format.
 Two-electron integral symmetry is turned on.
   690 basis functions,  1302 primitive gaussians,   730 cartesian basis functions
   143 alpha electrons      143 beta electrons
       nuclear repulsion energy      4136.7985806184 Hartrees.
 IExCor=  402 DFT=T Ex+Corr=B3LYP ExCW=0 ScaHFX=  0.200000
 ScaDFX=  0.800000  0.720000  1.000000  0.810000 ScalE2=  1.000000  1.000000
 IRadAn=      0 IRanWt=     -1 IRanGd=            0 ICorTp=0
 NAtoms=   66 NActive=   66 NUniq=   66 SFac= 1.00D+00 NAtFMM=   50 NAOKFM=T Big=T
 No density basis found on file   724.
 ------------------------------------------------------------------------------
 Polarizable Continuum Model (PCM)
 =================================
 Model                : PCM.
 Atomic radii         : UFF (Universal Force Field).
 Polarization charges : Total charges.
 Charge compensation  : None.
 Solution method      : Matrix inversion.
 Cavity type          : Scaled VdW (van der Waals Surface) (Alpha=1.100).
 Cavity algorithm     : GePol (No added spheres)
                        Default sphere list used, NSphG=   66.
                        Lebedev-Laikov grids with approx.  5.0 points / Ang**2.
                        Smoothing algorithm: Karplus/York (Gamma=1.0000).
                        Polarization charges: spherical gaussians, with
                                              point-specific exponents (IZeta= 3).
                        Self-potential: point-specific (ISelfS= 7).
                        Self-field    : sphere-specific E.n sum rule (ISelfD= 2).
 1st derivatives      : Analytical E(r).r(x)/FMM algorithm (CHGder, D1EAlg=3).
                        Cavity 1st derivative terms included.
 Solvent              : Water, Eps=  78.355300 Eps(inf)=   1.777849
 ------------------------------------------------------------------------------
 GePol: Number of generator spheres                  =      66
 GePol: Total number of spheres                      =      66
 GePol: Number of exposed spheres                    =      66 (100.00%)
 GePol: Number of points                             =    5007
 GePol: Average weight of points                     =       0.13
 GePol: Minimum weight of points                     =   0.25D-11
 GePol: Maximum weight of points                     =    0.20577
 GePol: Number of points with low weight             =     346
 GePol: Fraction of low-weight points (<1% of avg)   =       6.91%
 GePol: Cavity surface area                          =    646.856 Ang**2
 GePol: Cavity volume                                =    715.221 Ang**3
 Leave Link  301 at Thu Oct 13 22:56:37 2016, MaxMem= 1342177280 cpu:       1.9
 (Enter /opt/software/g09/linda-exe/l302.exel)
 NPDir=0 NMtPBC=     1 NCelOv=     1 NCel=       1 NClECP=     1 NCelD=      1
         NCelK=      1 NCelE2=     1 NClLst=     1 CellRange=     0.0.
 One-electron integrals computed using PRISM.
   1 Symmetry operations used in ECPInt.
 ECPInt:  NShTT=   28441 NPrTT=  163533 LenC2=   15367 LenP2D=   47214.
 LDataN:  DoStor=T MaxTD1= 4 Len=   56
 NBasis=   690 RedAO= T  NBF=   690
 NBsUse=   690 1.00D-06 NBFU=   690
 Precomputing XC quadrature grid using
 IXCGrd= 2 IRadAn=           0 IRanWt=          -1 IRanGd=           0 AccXCQ= 0.00D+00.
 NRdTot=    4293 NPtTot=      549246 NUsed=      580168 NTot=      580200
 NSgBfM=   589   593   599   602   607 NAtAll=    66    66.
 Leave Link  302 at Thu Oct 13 22:56:42 2016, MaxMem= 1342177280 cpu:      91.2
 (Enter /opt/software/g09/l303.exe)
 DipDrv:  MaxL=1.
 Leave Link  303 at Thu Oct 13 22:56:43 2016, MaxMem= 1342177280 cpu:       4.4
 (Enter /opt/software/g09/linda-exe/l401.exel)
 Initial guess read from the read-write file.
 B after Tr=     0.000000    0.000000    0.000000
         Rot=    1.000000    0.000000    0.000000    0.000000 Ang=   0.00 deg.
 Guess basis will be translated and rotated to current coordinates.
 Initial guess orbital symmetries:
 Alpha Orbitals:
       Occupied  (A) (A) (A) (A) (A) (A) (A) (A) (A) (A) (A) (A)
                 (A) (A) (A) (A) (A) (A) (A) (A) (A) (A) (A) (A)
                 (A) (A) (A) (A) (A) (A) (A) (A) (A) (A) (A) (A)
                 (A) (A) (A) (A) (A) (A) (A) (A) (A) (A) (A) (A)
                 (A) (A) (A) (A) (A) (A) (A) (A) (A) (A) (A) (A)
                 (A) (A) (A) (A) (A) (A) (A) (A) (A) (A) (A) (A)
                 (A) (A) (A) (A) (A) (A) (A) (A) (A) (A) (A) (A)
                 (A) (A) (A) (A) (A) (A) (A) (A) (A) (A) (A) (A)
                 (A) (A) (A) (A) (A) (A) (A) (A) (A) (A) (A) (A)
                 (A) (A) (A) (A) (A) (A) (A) (A) (A) (A) (A) (A)
                 (A) (A) (A) (A) (A) (A) (A) (A) (A) (A) (A) (A)
                 (A) (A) (A) (A) (A) (A) (A) (A) (A) (A) (A)
       Virtual   (A) (A) (A) (A) (A) (A) (A) (A) (A) (A) (A) (A)
                 (A) (A) (A) (A) (A) (A) (A) (A) (A) (A) (A) (A)
                 (A) (A) (A) (A) (A) (A) (A) (A) (A) (A) (A) (A)
                 (A) (A) (A) (A) (A) (A) (A) (A) (A) (A) (A) (A)
                 (A) (A) (A) (A) (A) (A) (A) (A) (A) (A) (A) (A)
                 (A) (A) (A) (A) (A) (A) (A) (A) (A) (A) (A) (A)
                 (A) (A) (A) (A) (A) (A) (A) (A) (A) (A) (A) (A)
                 (A) (A) (A) (A) (A) (A) (A) (A) (A) (A) (A) (A)
                 (A) (A) (A) (A) (A) (A) (A) (A) (A) (A) (A) (A)
                 (A) (A) (A) (A) (A) (A) (A) (A) (A) (A) (A) (A)
                 (A) (A) (A) (A) (A) (A) (A) (A) (A) (A) (A) (A)
                 (A) (A) (A) (A) (A) (A) (A) (A) (A) (A) (A) (A)
                 (A) (A) (A) (A) (A) (A) (A) (A) (A) (A) (A) (A)
                 (A) (A) (A) (A) (A) (A) (A) (A) (A) (A) (A) (A)
                 (A) (A) (A) (A) (A) (A) (A) (A) (A) (A) (A) (A)
                 (A) (A) (A) (A) (A) (A) (A) (A) (A) (A) (A) (A)
                 (A) (A) (A) (A) (A) (A) (A) (A) (A) (A) (A) (A)
                 (A) (A) (A) (A) (A) (A) (A) (A) (A) (A) (A) (A)
                 (A) (A) (A) (A) (A) (A) (A) (A) (A) (A) (A) (A)
                 (A) (A) (A) (A) (A) (A) (A) (A) (A) (A) (A) (A)
                 (A) (A) (A) (A) (A) (A) (A) (A) (A) (A) (A) (A)
                 (A) (A) (A) (A) (A) (A) (A) (A) (A) (A) (A) (A)
                 (A) (A) (A) (A) (A) (A) (A) (A) (A) (A) (A) (A)
                 (A) (A) (A) (A) (A) (A) (A) (A) (A) (A) (A) (A)
                 (A) (A) (A) (A) (A) (A) (A) (A) (A) (A) (A) (A)
                 (A) (A) (A) (A) (A) (A) (A) (A) (A) (A) (A) (A)
                 (A) (A) (A) (A) (A) (A) (A) (A) (A) (A) (A) (A)
                 (A) (A) (A) (A) (A) (A) (A) (A) (A) (A) (A) (A)
                 (A) (A) (A) (A) (A) (A) (A) (A) (A) (A) (A) (A)
                 (A) (A) (A) (A) (A) (A) (A) (A) (A) (A) (A) (A)
                 (A) (A) (A) (A) (A) (A) (A) (A) (A) (A) (A) (A)
                 (A) (A) (A) (A) (A) (A) (A) (A) (A) (A) (A) (A)
                 (A) (A) (A) (A) (A) (A) (A) (A) (A) (A) (A) (A)
                 (A) (A) (A) (A) (A) (A) (A) (A) (A) (A) (A) (A)
                 (A) (A) (A) (A) (A) (A) (A) (A) (A) (A) (A) (A)
                 (A) (A) (A) (A) (A) (A) (A) (A) (A) (A) (A) (A)
                 (A) (A) (A) (A) (A) (A) (A) (A) (A) (A) (A) (A)
                 (A) (A) (A) (A) (A) (A) (A) (A) (A) (A) (A) (A)
                 (A) (A) (A) (A) (A) (A) (A) (A) (A) (A) (A) (A)
                 (A) (A) (A) (A) (A) (A) (A) (A) (A) (A) (A) (A)
                 (A) (A) (A) (A) (A) (A) (A) (A) (A) (A) (A) (A)
                 (A) (A) (A) (A) (A) (A) (A) (A) (A) (A) (A) (A)
                 (A) (A) (A) (A) (A) (A) (A) (A) (A) (A) (A) (A)
                 (A) (A) (A) (A) (A) (A) (A) (A) (A) (A) (A) (A)
                 (A) (A) (A) (A) (A) (A) (A) (A) (A) (A) (A) (A)
                 (A) (A) (A) (A) (A) (A) (A)
 Beta  Orbitals:
       Occupied  (A) (A) (A) (A) (A) (A) (A) (A) (A) (A) (A) (A)
                 (A) (A) (A) (A) (A) (A) (A) (A) (A) (A) (A) (A)
                 (A) (A) (A) (A) (A) (A) (A) (A) (A) (A) (A) (A)
                 (A) (A) (A) (A) (A) (A) (A) (A) (A) (A) (A) (A)
                 (A) (A) (A) (A) (A) (A) (A) (A) (A) (A) (A) (A)
                 (A) (A) (A) (A) (A) (A) (A) (A) (A) (A) (A) (A)
                 (A) (A) (A) (A) (A) (A) (A) (A) (A) (A) (A) (A)
                 (A) (A) (A) (A) (A) (A) (A) (A) (A) (A) (A) (A)
                 (A) (A) (A) (A) (A) (A) (A) (A) (A) (A) (A) (A)
                 (A) (A) (A) (A) (A) (A) (A) (A) (A) (A) (A) (A)
                 (A) (A) (A) (A) (A) (A) (A) (A) (A) (A) (A) (A)
                 (A) (A) (A) (A) (A) (A) (A) (A) (A) (A) (A)
       Virtual   (A) (A) (A) (A) (A) (A) (A) (A) (A) (A) (A) (A)
                 (A) (A) (A) (A) (A) (A) (A) (A) (A) (A) (A) (A)
                 (A) (A) (A) (A) (A) (A) (A) (A) (A) (A) (A) (A)
                 (A) (A) (A) (A) (A) (A) (A) (A) (A) (A) (A) (A)
                 (A) (A) (A) (A) (A) (A) (A) (A) (A) (A) (A) (A)
                 (A) (A) (A) (A) (A) (A) (A) (A) (A) (A) (A) (A)
                 (A) (A) (A) (A) (A) (A) (A) (A) (A) (A) (A) (A)
                 (A) (A) (A) (A) (A) (A) (A) (A) (A) (A) (A) (A)
                 (A) (A) (A) (A) (A) (A) (A) (A) (A) (A) (A) (A)
                 (A) (A) (A) (A) (A) (A) (A) (A) (A) (A) (A) (A)
                 (A) (A) (A) (A) (A) (A) (A) (A) (A) (A) (A) (A)
                 (A) (A) (A) (A) (A) (A) (A) (A) (A) (A) (A) (A)
                 (A) (A) (A) (A) (A) (A) (A) (A) (A) (A) (A) (A)
                 (A) (A) (A) (A) (A) (A) (A) (A) (A) (A) (A) (A)
                 (A) (A) (A) (A) (A) (A) (A) (A) (A) (A) (A) (A)
                 (A) (A) (A) (A) (A) (A) (A) (A) (A) (A) (A) (A)
                 (A) (A) (A) (A) (A) (A) (A) (A) (A) (A) (A) (A)
                 (A) (A) (A) (A) (A) (A) (A) (A) (A) (A) (A) (A)
                 (A) (A) (A) (A) (A) (A) (A) (A) (A) (A) (A) (A)
                 (A) (A) (A) (A) (A) (A) (A) (A) (A) (A) (A) (A)
                 (A) (A) (A) (A) (A) (A) (A) (A) (A) (A) (A) (A)
                 (A) (A) (A) (A) (A) (A) (A) (A) (A) (A) (A) (A)
                 (A) (A) (A) (A) (A) (A) (A) (A) (A) (A) (A) (A)
                 (A) (A) (A) (A) (A) (A) (A) (A) (A) (A) (A) (A)
                 (A) (A) (A) (A) (A) (A) (A) (A) (A) (A) (A) (A)
                 (A) (A) (A) (A) (A) (A) (A) (A) (A) (A) (A) (A)
                 (A) (A) (A) (A) (A) (A) (A) (A) (A) (A) (A) (A)
                 (A) (A) (A) (A) (A) (A) (A) (A) (A) (A) (A) (A)
                 (A) (A) (A) (A) (A) (A) (A) (A) (A) (A) (A) (A)
                 (A) (A) (A) (A) (A) (A) (A) (A) (A) (A) (A) (A)
                 (A) (A) (A) (A) (A) (A) (A) (A) (A) (A) (A) (A)
                 (A) (A) (A) (A) (A) (A) (A) (A) (A) (A) (A) (A)
                 (A) (A) (A) (A) (A) (A) (A) (A) (A) (A) (A) (A)
                 (A) (A) (A) (A) (A) (A) (A) (A) (A) (A) (A) (A)
                 (A) (A) (A) (A) (A) (A) (A) (A) (A) (A) (A) (A)
                 (A) (A) (A) (A) (A) (A) (A) (A) (A) (A) (A) (A)
                 (A) (A) (A) (A) (A) (A) (A) (A) (A) (A) (A) (A)
                 (A) (A) (A) (A) (A) (A) (A) (A) (A) (A) (A) (A)
                 (A) (A) (A) (A) (A) (A) (A) (A) (A) (A) (A) (A)
                 (A) (A) (A) (A) (A) (A) (A) (A) (A) (A) (A) (A)
                 (A) (A) (A) (A) (A) (A) (A) (A) (A) (A) (A) (A)
                 (A) (A) (A) (A) (A) (A) (A) (A) (A) (A) (A) (A)
                 (A) (A) (A) (A) (A) (A) (A) (A) (A) (A) (A) (A)
                 (A) (A) (A) (A) (A) (A) (A) (A) (A) (A) (A) (A)
                 (A) (A) (A) (A) (A) (A) (A) (A) (A) (A) (A) (A)
                 (A) (A) (A) (A) (A) (A) (A)
 The electronic state of the initial guess is 1-A.
 Initial guess <Sx>= 0.0000 <Sy>= 0.0000 <Sz>= 0.0000 <S**2>= 0.0000 S= 0.0000
 Generating alternative initial guess.
 Harris functional with IExCor=  402 diagonalized for initial guess.
 ExpMin= 1.61D-01 ExpMax= 5.48D+03 ExpMxC= 8.25D+02 IAcc=1 IRadAn=         1 AccDes= 0.00D+00
 HarFok:  IExCor=  402 AccDes= 0.00D+00 IRadAn=         1 IDoV= 1
 ScaDFX=  1.000000  1.000000  1.000000  1.000000
 FoFCou: FMM=F IPFlag=           0 FMFlag=      100000 FMFlg1=        2001
         NFxFlg=           0 DoJE=T BraDBF=F KetDBF=T FulRan=T
         Omega=  0.000000  0.000000  1.000000  0.000000  0.000000 ICntrl=     500 IOpCl=  0
         NMat0=    1 NMatS0=    1 NMatT0=    0 NMatD0=    1 NMtDS0=    0 NMtDT0=    0
         I1Cent=           4 NGrid=           0.
 Petite list used in FoFCou.
 Harris En= -1899.42785393939    
 Leave Link  401 at Thu Oct 13 22:56:54 2016, MaxMem= 1342177280 cpu:     191.5
 (Enter /opt/software/g09/linda-exe/l502.exel)
 UHF open shell SCF:
 Requested convergence on RMS density matrix=1.00D-08 within 600 cycles.
 Requested convergence on MAX density matrix=1.00D-06.
 Requested convergence on             energy=1.00D-06.
 No special actions if energy rises.
 Using DIIS extrapolation, IDIIS=  1040.
 Integral symmetry usage will be decided dynamically.
       579561 words used for storage of precomputed grid.
 IEnd=     2562423 IEndB=     2562423 NGot=  1342177280 MDV=  1340509688
 LenX=  1340509688 LenY=  1339976058
 Fock matrices will be formed incrementally for  20 cycles.

 Cycle   1  Pass 1  IDiag  1:
 FoFCou: FMM=T IPFlag=           0 FMFlag=      100000 FMFlg1=        2001
         NFxFlg=           0 DoJE=F BraDBF=F KetDBF=F FulRan=T
         Omega=  0.000000  0.000000  1.000000  0.000000  0.000000 ICntrl=       0 IOpCl=  1
         NMat0=    1 NMatS0=    1 NMatT0=    0 NMatD0=    1 NMtDS0=    0 NMtDT0=    0
         I1Cent=           0 NGrid=           0.
 Symmetry not used in FoFCou.
 FMM levels:  10  Number of levels for PrismC:   9
 E= -1856.41294649157    
 DIIS: error= 7.18D-02 at cycle   1 NSaved=   1.
 NSaved= 1 IEnMin= 1 EnMin= -1856.41294649157     IErMin= 1 ErrMin= 7.18D-02
 ErrMax= 7.18D-02 EMaxC= 1.00D-01 BMatC= 5.74D+01 BMatP= 5.74D+01
 IDIUse=3 WtCom= 2.82D-01 WtEn= 7.18D-01
 Coeff-Com:  0.100D+01
 Coeff-En:   0.100D+01
 Coeff:      0.100D+01
 Recover alternate guess density for next cycle.
 RMSDP=1.43D-02 MaxDP=6.28D-01              OVMax= 0.00D+00

 Cycle   2  Pass 1  IDiag  1:
 RMSU=  7.16D-03    CP:  4.40D-01
 E= -1898.82428704649     Delta-E=      -42.411340554920 Rises=F Damp=F
 DIIS: error= 2.52D-02 at cycle   2 NSaved=   2.
 NSaved= 2 IEnMin= 2 EnMin= -1898.82428704649     IErMin= 2 ErrMin= 2.52D-02
 ErrMax= 2.52D-02 EMaxC= 1.00D-01 BMatC= 3.17D+00 BMatP= 5.74D+01
 IDIUse=3 WtCom= 7.48D-01 WtEn= 2.52D-01
 Coeff-Com:  0.159D-01 0.984D+00
 Coeff-En:   0.000D+00 0.100D+01
 Coeff:      0.119D-01 0.988D+00
 Gap=     0.199 Goal=   None    Shift=    0.000
 Gap=     0.199 Goal=   None    Shift=    0.000
 RMSDP=3.11D-03 MaxDP=2.34D-01 DE=-4.24D+01 OVMax= 2.52D-01

 Cycle   3  Pass 1  IDiag  1:
 RMSU=  2.19D-03    CP:  4.33D-01  9.70D-01
 E= -1898.14703917482     Delta-E=        0.677247871665 Rises=F Damp=F
 DIIS: error= 3.53D-02 at cycle   3 NSaved=   3.
 NSaved= 3 IEnMin= 2 EnMin= -1898.82428704649     IErMin= 2 ErrMin= 2.52D-02
 ErrMax= 3.53D-02 EMaxC= 1.00D-01 BMatC= 6.72D+00 BMatP= 3.17D+00
 IDIUse=2 WtCom= 0.00D+00 WtEn= 1.00D+00
 Coeff-En:   0.000D+00 0.644D+00 0.356D+00
 Coeff:      0.000D+00 0.644D+00 0.356D+00
 Gap=     0.168 Goal=   None    Shift=    0.000
 Gap=     0.168 Goal=   None    Shift=    0.000
 RMSDP=1.89D-03 MaxDP=1.71D-01 DE= 6.77D-01 OVMax= 1.76D-01

 Cycle   4  Pass 1  IDiag  1:
 RMSU=  5.85D-04    CP:  4.32D-01  9.77D-01  4.53D-01
 E= -1899.53128016858     Delta-E=       -1.384240993757 Rises=F Damp=F
 DIIS: error= 6.11D-03 at cycle   4 NSaved=   4.
 NSaved= 4 IEnMin= 4 EnMin= -1899.53128016858     IErMin= 4 ErrMin= 6.11D-03
 ErrMax= 6.11D-03 EMaxC= 1.00D-01 BMatC= 2.65D-01 BMatP= 3.17D+00
 IDIUse=3 WtCom= 9.39D-01 WtEn= 6.11D-02
 Coeff-Com:  0.533D-03 0.287D+00 0.188D+00 0.524D+00
 Coeff-En:   0.000D+00 0.000D+00 0.000D+00 0.100D+01
 Coeff:      0.500D-03 0.270D+00 0.177D+00 0.553D+00
 Gap=     0.161 Goal=   None    Shift=    0.000
 Gap=     0.161 Goal=   None    Shift=    0.000
 RMSDP=4.70D-04 MaxDP=3.25D-02 DE=-1.38D+00 OVMax= 3.77D-02

 Cycle   5  Pass 1  IDiag  1:
 RMSU=  2.24D-04    CP:  4.34D-01  9.79D-01  4.40D-01  5.86D-01
 E= -1899.58657394042     Delta-E=       -0.055293771847 Rises=F Damp=F
 DIIS: error= 3.05D-03 at cycle   5 NSaved=   5.
 NSaved= 5 IEnMin= 5 EnMin= -1899.58657394042     IErMin= 5 ErrMin= 3.05D-03
 ErrMax= 3.05D-03 EMaxC= 1.00D-01 BMatC= 3.96D-02 BMatP= 2.65D-01
 IDIUse=3 WtCom= 9.69D-01 WtEn= 3.05D-02
 Coeff-Com: -0.547D-03 0.631D-01 0.307D-01 0.290D+00 0.617D+00
 Coeff-En:   0.000D+00 0.000D+00 0.000D+00 0.718D-01 0.928D+00
 Coeff:     -0.530D-03 0.612D-01 0.297D-01 0.283D+00 0.627D+00
 Gap=     0.160 Goal=   None    Shift=    0.000
 Gap=     0.160 Goal=   None    Shift=    0.000
 RMSDP=1.51D-04 MaxDP=1.32D-02 DE=-5.53D-02 OVMax= 1.67D-02

 Cycle   6  Pass 1  IDiag  1:
 RMSU=  6.90D-05    CP:  4.33D-01  9.79D-01  4.31D-01  6.68D-01  7.23D-01
 E= -1899.59379954165     Delta-E=       -0.007225601231 Rises=F Damp=F
 DIIS: error= 8.63D-04 at cycle   6 NSaved=   6.
 NSaved= 6 IEnMin= 6 EnMin= -1899.59379954165     IErMin= 6 ErrMin= 8.63D-04
 ErrMax= 8.63D-04 EMaxC= 1.00D-01 BMatC= 4.33D-03 BMatP= 3.96D-02
 IDIUse=3 WtCom= 9.91D-01 WtEn= 8.63D-03
 Coeff-Com: -0.113D-03 0.103D-01-0.212D-03 0.115D+00 0.353D+00 0.522D+00
 Coeff-En:   0.000D+00 0.000D+00 0.000D+00 0.000D+00 0.429D-01 0.957D+00
 Coeff:     -0.112D-03 0.102D-01-0.210D-03 0.114D+00 0.351D+00 0.526D+00
 Gap=     0.160 Goal=   None    Shift=    0.000
 Gap=     0.160 Goal=   None    Shift=    0.000
 RMSDP=5.71D-05 MaxDP=3.47D-03 DE=-7.23D-03 OVMax= 7.02D-03

 Cycle   7  Pass 1  IDiag  1:
 RMSU=  2.15D-05    CP:  4.33D-01  9.79D-01  4.32D-01  6.74D-01  7.53D-01
                    CP:  5.19D-01
 E= -1899.59479597019     Delta-E=       -0.000996428540 Rises=F Damp=F
 DIIS: error= 2.84D-04 at cycle   7 NSaved=   7.
 NSaved= 7 IEnMin= 7 EnMin= -1899.59479597019     IErMin= 7 ErrMin= 2.84D-04
 ErrMax= 2.84D-04 EMaxC= 1.00D-01 BMatC= 3.12D-04 BMatP= 4.33D-03
 IDIUse=3 WtCom= 9.97D-01 WtEn= 2.84D-03
 Coeff-Com: -0.432D-05 0.505D-03-0.278D-02 0.379D-01 0.131D+00 0.282D+00
 Coeff-Com:  0.551D+00
 Coeff-En:   0.000D+00 0.000D+00 0.000D+00 0.000D+00 0.000D+00 0.000D+00
 Coeff-En:   0.100D+01
 Coeff:     -0.431D-05 0.503D-03-0.277D-02 0.378D-01 0.131D+00 0.281D+00
 Coeff:      0.552D+00
 Gap=     0.160 Goal=   None    Shift=    0.000
 Gap=     0.160 Goal=   None    Shift=    0.000
 RMSDP=1.46D-05 MaxDP=9.97D-04 DE=-9.96D-04 OVMax= 2.00D-03

 Cycle   8  Pass 1  IDiag  1:
 RMSU=  5.90D-06    CP:  4.33D-01  9.79D-01  4.32D-01  6.75D-01  7.56D-01
                    CP:  5.84D-01  6.68D-01
 E= -1899.59486875487     Delta-E=       -0.000072784675 Rises=F Damp=F
 DIIS: error= 7.53D-05 at cycle   8 NSaved=   8.
 NSaved= 8 IEnMin= 8 EnMin= -1899.59486875487     IErMin= 8 ErrMin= 7.53D-05
 ErrMax= 7.53D-05 EMaxC= 1.00D-01 BMatC= 2.74D-05 BMatP= 3.12D-04
 IDIUse=1 WtCom= 1.00D+00 WtEn= 0.00D+00
 Coeff-Com: -0.640D-05-0.407D-03-0.162D-02 0.130D-01 0.466D-01 0.121D+00
 Coeff-Com:  0.310D+00 0.511D+00
 Coeff:     -0.640D-05-0.407D-03-0.162D-02 0.130D-01 0.466D-01 0.121D+00
 Coeff:      0.310D+00 0.511D+00
 Gap=     0.160 Goal=   None    Shift=    0.000
 Gap=     0.160 Goal=   None    Shift=    0.000
 RMSDP=4.09D-06 MaxDP=3.30D-04 DE=-7.28D-05 OVMax= 4.76D-04

 Cycle   9  Pass 1  IDiag  1:
 RMSU=  1.73D-06    CP:  4.33D-01  9.79D-01  4.32D-01  6.75D-01  7.57D-01
                    CP:  5.84D-01  6.95D-01  6.24D-01
 E= -1899.59487418805     Delta-E=       -0.000005433178 Rises=F Damp=F
 DIIS: error= 3.14D-05 at cycle   9 NSaved=   9.
 NSaved= 9 IEnMin= 9 EnMin= -1899.59487418805     IErMin= 9 ErrMin= 3.14D-05
 ErrMax= 3.14D-05 EMaxC= 1.00D-01 BMatC= 3.29D-06 BMatP= 2.74D-05
 IDIUse=1 WtCom= 1.00D+00 WtEn= 0.00D+00
 Coeff-Com: -0.166D-05-0.328D-03-0.840D-03 0.488D-02 0.173D-01 0.517D-01
 Coeff-Com:  0.146D+00 0.312D+00 0.469D+00
 Coeff:     -0.166D-05-0.328D-03-0.840D-03 0.488D-02 0.173D-01 0.517D-01
 Coeff:      0.146D+00 0.312D+00 0.469D+00
 Gap=     0.160 Goal=   None    Shift=    0.000
 Gap=     0.160 Goal=   None    Shift=    0.000
 RMSDP=1.33D-06 MaxDP=1.49D-04 DE=-5.43D-06 OVMax= 1.81D-04

 Cycle  10  Pass 1  IDiag  1:
 RMSU=  6.01D-07    CP:  4.33D-01  9.79D-01  4.32D-01  6.75D-01  7.57D-01
                    CP:  5.85D-01  6.97D-01  6.65D-01  6.32D-01
 E= -1899.59487483559     Delta-E=       -0.000000647541 Rises=F Damp=F
 DIIS: error= 6.59D-06 at cycle  10 NSaved=  10.
 NSaved=10 IEnMin=10 EnMin= -1899.59487483559     IErMin=10 ErrMin= 6.59D-06
 ErrMax= 6.59D-06 EMaxC= 1.00D-01 BMatC= 2.31D-07 BMatP= 3.29D-06
 IDIUse=1 WtCom= 1.00D+00 WtEn= 0.00D+00
 Coeff-Com:  0.108D-05-0.886D-04-0.175D-03 0.404D-03 0.955D-03 0.658D-02
 Coeff-Com:  0.222D-01 0.645D-01 0.225D+00 0.681D+00
 Coeff:      0.108D-05-0.886D-04-0.175D-03 0.404D-03 0.955D-03 0.658D-02
 Coeff:      0.222D-01 0.645D-01 0.225D+00 0.681D+00
 Gap=     0.160 Goal=   None    Shift=    0.000
 Gap=     0.160 Goal=   None    Shift=    0.000
 RMSDP=4.19D-07 MaxDP=3.25D-05 DE=-6.48D-07 OVMax= 7.01D-05

 Cycle  11  Pass 1  IDiag  1:
 RMSU=  2.11D-07    CP:  4.33D-01  9.79D-01  4.32D-01  6.75D-01  7.57D-01
                    CP:  5.86D-01  6.98D-01  6.70D-01  7.10D-01  7.95D-01
 E= -1899.59487487971     Delta-E=       -0.000000044121 Rises=F Damp=F
 DIIS: error= 2.81D-06 at cycle  11 NSaved=  11.
 NSaved=11 IEnMin=11 EnMin= -1899.59487487971     IErMin=11 ErrMin= 2.81D-06
 ErrMax= 2.81D-06 EMaxC= 1.00D-01 BMatC= 4.34D-08 BMatP= 2.31D-07
 IDIUse=1 WtCom= 1.00D+00 WtEn= 0.00D+00
 Coeff-Com:  0.444D-06-0.228D-04-0.312D-04-0.159D-03-0.905D-03-0.517D-03
 Coeff-Com:  0.219D-03 0.880D-02 0.828D-01 0.397D+00 0.513D+00
 Coeff:      0.444D-06-0.228D-04-0.312D-04-0.159D-03-0.905D-03-0.517D-03
 Coeff:      0.219D-03 0.880D-02 0.828D-01 0.397D+00 0.513D+00
 Gap=     0.160 Goal=   None    Shift=    0.000
 Gap=     0.160 Goal=   None    Shift=    0.000
 RMSDP=1.64D-07 MaxDP=9.64D-06 DE=-4.41D-08 OVMax= 1.92D-05

 Cycle  12  Pass 1  IDiag  1:
 RMSU=  7.04D-08    CP:  4.33D-01  9.79D-01  4.32D-01  6.75D-01  7.57D-01
                    CP:  5.86D-01  6.98D-01  6.71D-01  7.15D-01  8.77D-01
                    CP:  6.60D-01
 E= -1899.59487488913     Delta-E=       -0.000000009418 Rises=F Damp=F
 DIIS: error= 8.06D-07 at cycle  12 NSaved=  12.
 NSaved=12 IEnMin=12 EnMin= -1899.59487488913     IErMin=12 ErrMin= 8.06D-07
 ErrMax= 8.06D-07 EMaxC= 1.00D-01 BMatC= 3.32D-09 BMatP= 4.34D-08
 IDIUse=1 WtCom= 1.00D+00 WtEn= 0.00D+00
 Coeff-Com: -0.141D-06-0.104D-05 0.707D-05-0.138D-03-0.603D-03-0.113D-02
 Coeff-Com: -0.281D-02-0.436D-02 0.973D-02 0.111D+00 0.262D+00 0.626D+00
 Coeff:     -0.141D-06-0.104D-05 0.707D-05-0.138D-03-0.603D-03-0.113D-02
 Coeff:     -0.281D-02-0.436D-02 0.973D-02 0.111D+00 0.262D+00 0.626D+00
 Gap=     0.160 Goal=   None    Shift=    0.000
 Gap=     0.160 Goal=   None    Shift=    0.000
 RMSDP=5.21D-08 MaxDP=4.82D-06 DE=-9.42D-09 OVMax= 8.88D-06

 Cycle  13  Pass 1  IDiag  1:
 RMSU=  2.48D-08    CP:  4.33D-01  9.79D-01  4.32D-01  6.75D-01  7.57D-01
                    CP:  5.86D-01  6.98D-01  6.71D-01  7.19D-01  8.85D-01
                    CP:  7.29D-01  7.18D-01
 E= -1899.59487488967     Delta-E=       -0.000000000538 Rises=F Damp=F
 DIIS: error= 3.87D-07 at cycle  13 NSaved=  13.
 NSaved=13 IEnMin=13 EnMin= -1899.59487488967     IErMin=13 ErrMin= 3.87D-07
 ErrMax= 3.87D-07 EMaxC= 1.00D-01 BMatC= 6.42D-10 BMatP= 3.32D-09
 IDIUse=1 WtCom= 1.00D+00 WtEn= 0.00D+00
 Coeff-Com:  0.346D-07 0.187D-05 0.779D-05-0.663D-04-0.272D-03-0.620D-03
 Coeff-Com: -0.166D-02-0.333D-02-0.252D-02 0.273D-01 0.105D+00 0.376D+00
 Coeff-Com:  0.500D+00
 Coeff:      0.346D-07 0.187D-05 0.779D-05-0.663D-04-0.272D-03-0.620D-03
 Coeff:     -0.166D-02-0.333D-02-0.252D-02 0.273D-01 0.105D+00 0.376D+00
 Coeff:      0.500D+00
 Gap=     0.160 Goal=   None    Shift=    0.000
 Gap=     0.160 Goal=   None    Shift=    0.000
 RMSDP=2.17D-08 MaxDP=2.03D-06 DE=-5.38D-10 OVMax= 3.85D-06

 Cycle  14  Pass 1  IDiag  1:
 RMSU=  8.83D-09    CP:  4.33D-01  9.79D-01  4.32D-01  6.75D-01  7.57D-01
                    CP:  5.86D-01  6.98D-01  6.71D-01  7.19D-01  8.90D-01
                    CP:  7.35D-01  7.75D-01  5.57D-01
 E= -1899.59487488981     Delta-E=       -0.000000000140 Rises=F Damp=F
 DIIS: error= 1.03D-07 at cycle  14 NSaved=  14.
 NSaved=14 IEnMin=14 EnMin= -1899.59487488981     IErMin=14 ErrMin= 1.03D-07
 ErrMax= 1.03D-07 EMaxC= 1.00D-01 BMatC= 4.27D-11 BMatP= 6.42D-10
 IDIUse=1 WtCom= 1.00D+00 WtEn= 0.00D+00
 Coeff-Com: -0.161D-07 0.912D-06 0.285D-05-0.138D-04-0.513D-04-0.153D-03
 Coeff-Com: -0.426D-03-0.101D-02-0.263D-02-0.156D-02 0.145D-01 0.953D-01
 Coeff-Com:  0.248D+00 0.648D+00
 Coeff:     -0.161D-07 0.912D-06 0.285D-05-0.138D-04-0.513D-04-0.153D-03
 Coeff:     -0.426D-03-0.101D-02-0.263D-02-0.156D-02 0.145D-01 0.953D-01
 Coeff:      0.248D+00 0.648D+00
 Gap=     0.160 Goal=   None    Shift=    0.000
 Gap=     0.160 Goal=   None    Shift=    0.000
 RMSDP=5.82D-09 MaxDP=4.69D-07 DE=-1.40D-10 OVMax= 7.90D-07

 Error on total polarization charges =  0.01339
 SCF Done:  E(UB3LYP) =  -1899.59487489     A.U. after   14 cycles
             Convg  =    0.5819D-08             -V/T =  2.0068
 <Sx>= 0.0000 <Sy>= 0.0000 <Sz>= 0.0000 <S**2>= 0.0000 S= 0.0000
 <L.S>= 0.000000000000E+00
 KE= 1.886785850678D+03 PE=-1.270876847110D+04 EE= 4.785589164916D+03
 Annihilation of the first spin contaminant:
 S**2 before annihilation     0.0000,   after     0.0000
 Leave Link  502 at Thu Oct 13 23:04:47 2016, MaxMem= 1342177280 cpu:    8802.2
 (Enter /opt/software/g09/linda-exe/l701.exel)
 Compute integral first derivatives.
 ... and contract with generalized density number  0.
   1 Symmetry operations used in ECPInt.
 ECPInt:  NShTT=   28441 NPrTT=  163533 LenC2=   15367 LenP2D=   47214.
 LDataN:  DoStor=T MaxTD1= 5 Len=  102
 D1PCM: PCM CHGder 1st derivatives, ID1Alg=3 FixD1E=F DoIter=F DoCFld=F I1PDM=0.
 GePol: Maximum number of non-zero 1st derivatives   =     200
 Leave Link  701 at Thu Oct 13 23:04:58 2016, MaxMem= 1342177280 cpu:     204.8
 (Enter /opt/software/g09/l702.exe)
 L702 exits ... SP integral derivatives will be done elsewhere.
 Leave Link  702 at Thu Oct 13 23:04:58 2016, MaxMem= 1342177280 cpu:       0.3
 (Enter /opt/software/g09/linda-exe/l703.exel)
 Compute integral first derivatives, UseDBF=F ICtDFT=           0.
 Integral derivatives from FoFDir, PRISM(SPDF).
 Calling FoFJK, ICntrl=      2127 FMM=T ISym2X=0 I1Cent= 0 IOpClX= 1 NMat=1 NMatS=1 NMatT=0.
 FoFCou: FMM=T IPFlag=           0 FMFlag=      100000 FMFlg1=        2001
         NFxFlg=           0 DoJE=F BraDBF=F KetDBF=F FulRan=T
         Omega=  0.000000  0.000000  1.000000  0.000000  0.000000 ICntrl=    2127 IOpCl=  1
         NMat0=    1 NMatS0=    1 NMatT0=    0 NMatD0=    1 NMtDS0=    0 NMtDT0=    0
         I1Cent=           0 NGrid=           0.
 Symmetry not used in FoFCou.
 FMM levels:  10  Number of levels for PrismC:   9
 Leave Link  703 at Thu Oct 13 23:05:21 2016, MaxMem= 1342177280 cpu:     411.6
 (Enter /opt/software/g09/l716.exe)
 Dipole        =-1.91074193D+00 1.74078103D-01 1.59111287D+00
 ***** Axes restored to original set *****
 -------------------------------------------------------------------
 Center     Atomic                   Forces (Hartrees/Bohr)
 Number     Number              X              Y              Z
 -------------------------------------------------------------------
      1        8          -0.002276472   -0.000279636   -0.000485567
      2        6           0.001698039   -0.000867856    0.000713797
      3        6          -0.002228913   -0.000709216    0.000064558
      4        6          -0.000626130   -0.001548381    0.000232752
      5        6           0.000061059    0.001465377    0.000036208
      6        8          -0.000616635    0.000244597   -0.000793546
      7        6           0.002169255    0.004249530   -0.001392436
      8        6          -0.000979506   -0.002798801    0.002944891
      9        8           0.000725629    0.001286799   -0.001124586
     10        8          -0.001456771   -0.003733786    0.000458247
     11        7          -0.000761235   -0.001426821    0.000570335
     12        7           0.004463619    0.000154381    0.001967302
     13        7           0.002229953    0.000569701   -0.003231792
     14        6          -0.005893151    0.000003986   -0.000931621
     15        6           0.000482870    0.000132539   -0.000389952
     16        6          -0.001892279   -0.000035331   -0.000320512
     17        6           0.000091976   -0.000000341   -0.000059986
     18        6          -0.000481838   -0.000093369    0.000510533
     19        6           0.000140796    0.000053846   -0.000392569
     20        6           0.003504227    0.001112598   -0.004538735
     21        7          -0.000227899    0.000559374   -0.000059263
     22        6           0.000512676   -0.000289553    0.000060553
     23        6          -0.000667492    0.000117658   -0.000036821
     24        6           0.000456736    0.000032924    0.000072204
     25        6          -0.000046486   -0.000146469   -0.000138871
     26        6           0.000084610   -0.000026921   -0.000116231
     27        6           0.000096686   -0.000027923   -0.000089428
     28        6           0.000173799   -0.000068455    0.000091246
[truncated: 1,795,220 more chars]
